# Supplementary material
Source: publisher figshare collection journal article supplement (https://gsapubs.figshare.com/articles/dataset/_/12542714)
Supplement: Supplementary file 1 [file 2]

## Sheet: Alico Land Dev Co 19-2
Table _____. U-Pb geochronologic analyses.
							Isotope ratios						Apparent ages (Ma)
Analysis	U	206Pb	U/Th	206Pb*	±	207Pb*	±	206Pb*	±	error	206Pb*	±	207Pb*	±	206Pb*	±	Best age	±	Conc
	(ppm)	204Pb		207Pb*	(%)	235U*	(%)	238U	(%)	corr.	238U*	(Ma)	235U	(Ma)	207Pb*	(Ma)	(Ma)	(Ma)	(%)
-Spot 243	71.5869	7317	1.60686	19.9004	2.18577	0.216133	2.4534	0.0312082	1.11427	0.454173	198.106	2.17386	198.686	4.42732	205.554	50.7069	198.106	2.17386	NA
-Spot 271	121.115	18038.4	1.93644	19.8032	1.0441	0.219786	1.43262	0.0315809	0.98095	0.684724	200.435	1.93591	201.732	2.62107	216.941	24.156	200.435	1.93591	NA
-Spot 118	172.594	37273.6	1.40105	19.1198	1.0383	0.229553	1.55537	0.0318459	1.15806	0.744556	202.091	2.30403	209.83	2.9485	297.634	23.7118	202.091	2.30403	NA
-Spot 44	58.3553	16177.5	1.93593	20.2104	1.15524	0.218672	1.99633	0.0320668	1.62811	0.815554	203.471	3.26099	200.804	3.63722	169.575	26.9885	203.471	3.26099	NA
-Spot 302	90.4184	11807.4	1.77141	19.2337	1.3911	0.229867	1.86992	0.0320794	1.24958	0.668253	203.549	2.50377	210.089	3.54872	284.074	31.7959	203.549	2.50377	NA
-Spot 81	410.363	8494.07	1.24192	15.6839	1.08244	0.4519	5.87984	0.0514262	5.77935	0.982909	323.272	18.2223	378.609	18.5844	732.762	22.9101	323.272	18.2223	NA
-Spot 230	747.25	1939.78	1.35471	12.3658	0.627547	0.580199	1.10749	0.0520579	0.912538	0.823967	327.144	2.91083	464.59	4.12894	1217.39	12.3411	327.144	2.91083	NA
-Spot 182	287.413	65480.3	6.63063	17.2684	0.572709	0.655381	1.23063	0.0821172	1.08925	0.885112	508.748	5.32849	511.785	4.94717	525.396	12.5495	508.748	5.32849	96.8314
-Spot 38	272.442	31208.9	12.3389	16.9116	0.636456	0.678391	1.37142	0.0832441	1.21479	0.88579	515.457	6.01792	525.801	5.62848	570.969	13.8547	515.457	6.01792	90.2777
-Spot 13	244.169	35116.4	1.24377	17.0335	0.60652	0.675981	1.08863	0.0835459	0.904014	0.830417	517.253	4.49336	524.342	4.45838	555.355	13.252	517.253	4.49336	93.1393
-Spot 112	160.107	76520.7	1.40099	16.8025	0.735052	0.687779	1.33938	0.0838513	1.11966	0.835953	519.07	5.58398	531.465	5.54205	585.067	15.934	519.07	5.58398	88.7198
-Spot 184	182.41	30927.3	1.12996	17.0368	0.780083	0.686059	1.39534	0.0848083	1.15691	0.829124	524.759	5.83045	530.43	5.76504	554.921	17.0311	524.759	5.83045	94.5646
-Spot 191	37.4717	29709.9	0.842887	17.1133	1.06005	0.687087	1.60524	0.0853168	1.20544	0.750943	527.78	6.10863	531.049	6.6382	545.124	23.1864	527.78	6.10863	96.8183
-Spot 286	75.68	18149.1	2.06771	17.103	0.782822	0.689871	1.41234	0.0856108	1.17554	0.832336	529.526	5.97601	532.723	5.8545	546.419	17.0821	529.526	5.97601	96.9085
-Spot 128	29.5403	442968	1.11295	16.6646	1.30692	0.710476	1.68668	0.0859079	1.06623	0.632146	531.29	5.43761	545.029	7.11381	602.877	28.2836	531.29	5.43761	88.1258
-Spot 94	211.533	76409.1	1.64591	17.0837	0.867132	0.693212	1.54392	0.0859283	1.27741	0.827379	531.411	6.51602	534.729	6.41823	548.911	18.9367	531.411	6.51602	96.812
-Spot 235	127.279	30072.2	2.0194	17.0558	0.885785	0.694536	1.66736	0.0859515	1.41261	0.847215	531.549	7.20749	535.522	6.93921	552.483	19.322	531.549	7.20749	96.2109
-Spot 65	111.154	19016.3	15.9635	17.3732	0.841452	0.682932	1.50761	0.0860885	1.25094	0.829749	532.362	6.39196	528.545	6.21206	512.114	18.508	532.362	6.39196	103.954
-Spot 312	23.0079	116210	1.17285	16.794	1.0813	0.707816	1.34842	0.0862507	0.805637	0.597465	533.325	4.12373	543.449	5.67467	586.131	23.4659	533.325	4.12373	90.9908
-Spot 277	9.75205	5081.83	0.512524	16.7561	3.12343	0.71035	3.37047	0.0863639	1.26658	0.375788	533.997	6.49095	544.954	14.2146	591.031	67.7417	533.997	6.49095	90.35
-Spot 288	120.622	22322.6	1.88587	16.8556	0.750997	0.708473	1.37419	0.0866475	1.15082	0.837457	535.679	5.91553	543.839	5.78622	578.185	16.3398	535.679	5.91553	92.6485
-Spot 34	175.422	102790	0.601767	16.841	0.764119	0.709119	1.45341	0.086651	1.23633	0.850643	535.7	6.35531	544.223	6.12307	580.097	16.6063	535.7	6.35531	92.3466
-Spot 61	116.206	19452.6	0.950772	16.7621	0.802225	0.71282	1.45315	0.0866956	1.21165	0.833805	535.965	6.23137	546.42	6.14065	590.28	17.3862	535.965	6.23137	90.7983
-Spot 21	64.0603	156246	1.62142	16.2655	0.787009	0.734813	1.84822	0.0867226	1.67228	0.904808	536.125	8.60283	559.374	7.94907	655.148	16.873	536.125	8.60283	81.8326
-Spot 187	66.9047	34631.1	1.58404	16.5488	0.741934	0.723361	1.47027	0.0868577	1.26935	0.86334	536.926	6.53934	552.649	6.26632	617.958	16.0361	536.926	6.53934	86.8871
-Spot 162	77.7183	631858	1.27227	16.9366	0.975158	0.70712	1.54764	0.0868972	1.20177	0.776519	537.161	6.1938	543.034	6.5093	567.787	21.2397	537.161	6.1938	94.606
-Spot 19	44.9964	6703.89	1.60197	17.3465	1.97433	0.691821	2.29018	0.0870748	1.16058	0.506763	538.214	5.99276	533.894	9.50938	515.457	43.3621	538.214	5.99276	104.415
-Spot 256	58.0339	45118.4	2.05804	16.8107	0.940923	0.714519	1.45723	0.0871538	1.11274	0.763597	538.682	5.7505	547.426	6.16644	584.007	20.4276	538.682	5.7505	92.239
-Spot 141	69.8391	10529.8	0.745563	16.5406	1.1476	0.727405	1.83783	0.0873004	1.43549	0.78108	539.552	7.42996	555.029	7.85826	619.015	24.7888	539.552	7.42996	87.1629
-Spot 255	181.309	27945.5	1.38873	17.0339	0.685232	0.706516	1.38399	0.0873219	1.20245	0.868828	539.679	6.22514	542.676	5.81806	555.302	14.9467	539.679	6.22514	97.1866
-Spot 123	20.966	6058.47	1.01062	17.1992	1.13714	0.701056	1.68916	0.0874879	1.24908	0.739465	540.663	6.47785	539.421	7.06875	534.175	24.8935	540.663	6.47785	101.214
-Spot 5	42.8559	179161	1.53719	16.9238	0.964777	0.714063	1.60051	0.0876841	1.27704	0.797896	541.826	6.63652	547.156	6.77023	569.434	20.975	541.826	6.63652	95.1516
-Spot 193	42.7374	115508	2.84523	16.6299	0.98588	0.726786	1.57424	0.0876969	1.2273	0.779616	541.902	6.37892	554.665	6.72784	607.387	21.3053	541.902	6.37892	89.2185
-Spot 285	277.63	116347	0.825294	17.1673	0.848107	0.704135	1.43233	0.0877092	1.15425	0.805852	541.975	5.99997	541.258	6.00939	538.218	18.5756	541.975	5.99997	100.698
-Spot 292	77.3841	114973	1.03711	16.9011	0.68289	0.715642	1.23997	0.0877604	1.03498	0.834682	542.278	5.38289	548.091	5.25186	572.304	14.8672	542.278	5.38289	94.7535
-Spot 212	48.3366	10973	1.28691	17.1282	0.892953	0.706832	1.53044	0.0878445	1.24294	0.812141	542.777	6.47016	542.863	6.43544	543.214	19.5203	542.777	6.47016	99.9194
-Spot 186	97.1652	93064.6	0.888961	16.8177	0.689192	0.720761	1.35624	0.087952	1.16808	0.861261	543.414	6.08734	551.116	5.76824	583.055	14.9549	543.414	6.08734	93.2012
-Spot 282	252.313	516147	1.8021	17.0981	0.725038	0.710019	1.25196	0.0880856	1.02065	0.815242	544.205	5.32645	544.757	5.2783	547.049	15.8183	544.205	5.32645	99.4802
-Spot 138	68.0615	8080.85	2.7412	17.0205	1.03992	0.7133	1.48666	0.0880909	1.06241	0.71463	544.236	5.54467	546.704	6.2847	556.98	22.6722	544.236	5.54467	97.7121
-Spot 92	137.464	24011.9	12.1809	17.018	0.983642	0.713625	1.64682	0.0881182	1.32079	0.80202	544.398	6.8951	546.896	6.96367	557.331	21.4491	544.398	6.8951	97.6795
-Spot 167	41.6508	346737	2.18245	17.172	0.946783	0.708171	1.4821	0.088236	1.14027	0.769362	545.096	5.96003	543.659	6.23905	537.644	20.7373	545.096	5.96003	101.386
-Spot 95	256.58	30782.2	83.331	17.1092	0.563882	0.710787	2.23906	0.0882382	2.1669	0.967769	545.109	11.3263	545.214	9.4461	545.63	12.3088	545.109	11.3263	99.9045
-Spot 225	91.0383	27021.7	1.24777	16.7986	0.892313	0.724015	1.45704	0.0882489	1.15184	0.790537	545.173	6.02134	553.034	6.21317	585.56	19.3466	545.173	6.02134	93.1028
-Spot 211	186.193	637724	1.08451	16.8485	0.712485	0.721929	1.19564	0.088256	0.960164	0.803056	545.215	5.01969	551.805	5.08994	579.077	15.4917	545.215	5.01969	94.1523
-Spot 4	15.88	7944.97	1.36492	16.5508	1.70917	0.734936	2.12319	0.0882584	1.25962	0.593269	545.229	6.5854	559.446	9.13262	617.692	36.9067	545.229	6.5854	88.2688
-Spot 210	325.826	39286.8	12.7319	17.0261	0.702183	0.714836	1.99298	0.0883098	1.86518	0.935876	545.533	9.75654	547.614	8.4358	556.257	15.2969	545.533	9.75654	98.0722
-Spot 88	74.3146	32026.2	1.83643	16.9373	0.704755	0.718606	1.31656	0.0883126	1.11204	0.844661	545.55	5.81714	549.844	5.5897	567.693	15.3393	545.55	5.81714	96.0995
-Spot 264	153.947	44937.9	16.4089	16.9405	0.794654	0.719464	1.63075	0.0884347	1.42403	0.873238	546.273	7.45863	550.35	6.92851	567.281	17.3	546.273	7.45863	96.2968
-Spot 203	144.514	15461	0.811669	17.1918	0.870135	0.708987	1.47752	0.0884396	1.19412	0.808193	546.302	6.25473	544.145	6.22397	535.097	19.0464	546.302	6.25473	102.094
-Spot 144	56.2972	10312.6	1.5849	17.0961	0.945626	0.713372	1.34877	0.0884913	0.961756	0.713061	546.608	5.04033	546.746	5.70213	547.344	20.6564	546.608	5.04033	99.8655
-Spot 248	47.7651	9283.2	2.45765	17.1623	1.35207	0.710936	1.79634	0.0885305	1.18268	0.658384	546.841	6.20067	545.302	7.57919	538.856	29.5851	546.841	6.20067	101.482
-Spot 246	52.9411	5853.38	1.33918	17.2696	1.51122	0.706818	1.82651	0.0885684	1.02584	0.561638	547.065	5.38046	542.855	7.68034	525.197	33.1387	547.065	5.38046	104.164
-Spot 241	32.0804	9656.21	1.37586	17.255	1.13359	0.708508	1.58149	0.0887047	1.10276	0.697291	547.872	5.79208	543.86	6.65931	527.104	24.8448	547.872	5.79208	103.94
-Spot 310	104.682	10542.7	2.51391	17.2802	0.930933	0.707476	1.39858	0.0887053	1.04374	0.746286	547.876	5.48215	543.247	5.8841	523.851	20.4232	547.876	5.48215	104.586
-Spot 303	156.58	149321	1.34438	17.0926	0.720375	0.715436	1.33106	0.0887292	1.11928	0.840891	548.017	5.88034	547.969	5.63675	547.791	15.7144	548.017	5.88034	100.041
-Spot 40	120.982	45606.6	0.896396	16.4834	0.802658	0.742562	1.64454	0.0888113	1.43536	0.872802	548.503	7.54734	563.9	7.11583	626.487	17.3229	548.503	7.54734	87.5522
-Spot 53	82.6367	9807.84	2.9915	17.1882	0.876618	0.712135	1.59508	0.0888141	1.3326	0.835444	548.52	7.00723	546.014	6.73664	535.589	19.2086	548.52	7.00723	102.414
-Spot 156	39.669	19654.6	1.54022	17.0711	0.86907	0.7179	1.26206	0.0889229	0.915162	0.725132	549.164	4.81762	549.427	5.35527	550.513	18.9623	549.164	4.81762	99.7549
-Spot 283	53.721	12567.7	1.41126	16.8269	0.980502	0.729008	1.68698	0.0890069	1.37277	0.813748	549.661	7.23286	555.971	7.2224	581.89	21.294	549.661	7.23286	94.4613
-Spot 221	58.3301	21983.1	2.57585	16.9173	0.812459	0.725265	1.38956	0.0890256	1.12729	0.811257	549.772	5.94059	553.77	5.93133	570.227	17.6763	549.772	5.94059	96.4128
-Spot 83	36.3689	9319.31	1.24854	16.6876	0.940918	0.735426	1.66514	0.0890475	1.37382	0.825044	549.901	7.24139	559.733	7.16508	599.891	20.3516	549.901	7.24139	91.6669
-Spot 97	30.752	7630.27	2.82441	17.2736	1.92995	0.711833	2.36373	0.0892171	1.36473	0.577365	550.906	7.2061	545.834	9.98063	524.697	42.3242	550.906	7.2061	104.995
-Spot 200	75.9915	142273	2.32311	17.0152	0.721362	0.722811	1.32879	0.0892376	1.11593	0.839815	551.027	5.89362	552.325	5.66078	557.679	15.7241	551.027	5.89362	98.8071
-Spot 169	35.9449	38387.8	1.76668	17.0452	1.12174	0.721962	1.73955	0.0892901	1.32957	0.764316	551.338	7.02569	551.824	7.4057	553.835	24.4711	551.338	7.02569	99.549
-Spot 250	87.5014	30940.9	1.52315	16.6155	0.74133	0.740733	1.22766	0.0893025	0.978556	0.797092	551.411	5.17153	562.833	5.30445	609.258	16.0151	551.411	5.17153	90.5053
-Spot 204	86.2687	51115.4	1.96247	16.8542	0.976189	0.730486	1.494	0.0893323	1.13098	0.757009	551.587	5.97888	556.838	6.40371	578.382	21.2083	551.587	5.97888	95.3674
-Spot 201	69.1187	24722.1	1.82815	17.0263	0.799453	0.723649	1.28364	0.0893995	1.00429	0.782379	551.985	5.31283	552.819	5.47212	556.236	17.4469	551.985	5.31283	99.2357
-Spot 265	124.372	9134.92	3.62878	16.5903	1.02127	0.742664	1.66791	0.0893996	1.31869	0.790621	551.985	6.97602	563.959	7.21753	612.537	22.0681	551.985	6.97602	90.1147
-Spot 262	79.8507	11867.3	1.86361	17.2061	0.838968	0.71631	1.2401	0.0894276	0.913224	0.736412	552.151	4.83246	548.486	5.25527	533.296	18.387	552.151	4.83246	103.536
-Spot 59	76.8773	13628.8	1.79036	17.1958	0.736156	0.718867	1.58651	0.089693	1.40538	0.88583	553.721	7.45702	549.998	6.73729	534.606	16.1347	553.721	7.45702	103.576
-Spot 242	272.702	196055	1.99141	16.9892	0.730589	0.727942	1.38232	0.0897339	1.17348	0.848918	553.963	6.22915	555.344	5.91304	561.004	15.9159	553.963	6.22915	98.745
-Spot 30	87.7012	330808	1.95814	16.9128	1.02112	0.731602	1.70081	0.0897798	1.36017	0.799719	554.235	7.22358	557.493	7.2966	570.796	22.22	554.235	7.22358	97.0985
-Spot 149	129.697	21858.7	1.05085	17.0566	0.621756	0.725658	1.25719	0.0898074	1.09268	0.869144	554.398	5.80462	554.001	5.36801	552.355	13.5904	554.398	5.80462	100.37
-Spot 1	32.0401	8472.49	1.66695	17.184	1.16366	0.720568	1.752	0.0898436	1.30974	0.747566	554.612	6.96026	551.002	7.45034	536.13	25.4473	554.612	6.96026	103.447
-Spot 124	55.3798	22640.5	1.4501	16.9091	0.831658	0.732573	1.4134	0.0898794	1.14282	0.808562	554.824	6.07544	558.062	6.06819	571.274	18.0981	554.824	6.07544	97.1205
-Spot 177	118.075	39988.6	1.77578	16.8288	0.783588	0.73629	1.29768	0.0899062	1.03439	0.797106	554.982	5.50049	560.238	5.58763	581.636	17.0301	554.982	5.50049	95.4175
-Spot 176	159.878	20951.8	2.51868	16.984	0.649423	0.730941	1.29018	0.0900763	1.11481	0.864077	555.988	5.93847	557.105	5.53203	561.652	14.1302	555.988	5.93847	98.9916
-Spot 63	84.9875	22269.9	0.859438	17.0919	0.956492	0.726462	1.63921	0.0900931	1.33121	0.812107	556.088	7.0924	554.474	7.00368	547.875	20.8916	556.088	7.0924	101.499
-Spot 314	52.9041	22453.1	2.68545	16.6908	0.995205	0.744052	1.54211	0.0901092	1.178	0.763885	556.183	6.27713	564.767	6.6803	599.475	21.5418	556.183	6.27713	92.7784
-Spot 259	57.9536	40164.3	1.49481	17.1481	0.858679	0.724274	1.29398	0.0901168	0.968016	0.748092	556.228	5.15862	553.187	5.51897	540.709	18.7824	556.228	5.15862	102.87
-Spot 196	56.4843	21252.4	1.7674	17.1916	0.843066	0.722565	1.19576	0.0901322	0.847992	0.709164	556.319	4.51972	552.18	5.09308	535.124	18.4559	556.319	4.51972	103.961
-Spot 219	60.4844	263308	2.21878	17.041	0.828259	0.729115	1.49666	0.0901525	1.24658	0.832912	556.439	6.64555	556.033	6.40812	554.353	18.0888	556.439	6.64555	100.376
-Spot 165	139.317	29334.1	3.00589	17.1015	0.737483	0.726545	1.24454	0.0901539	1.00249	0.805515	556.447	5.34437	554.523	5.31774	546.61	16.091	556.447	5.34437	101.8
-Spot 199	113.823	16592.7	7.62288	16.4862	1.15575	0.753676	1.79957	0.0901559	1.37938	0.766507	556.459	7.35375	570.355	7.85313	626.121	24.9144	556.459	7.35375	88.874
-Spot 85	260.899	269851	1.9961	16.7419	0.664635	0.742351	1.15241	0.0901784	0.941444	0.816933	556.592	5.02016	563.777	4.98558	592.897	14.3882	556.592	5.02016	93.8767
-Spot 80	56.0211	32604.1	2.04754	16.7661	0.998473	0.741465	1.53964	0.0902009	1.17198	0.761206	556.725	6.25093	563.26	6.65628	589.722	21.6344	556.725	6.25093	94.4048
-Spot 281	28.1759	34900.7	1.64455	16.7245	0.993237	0.743686	1.48571	0.0902464	1.10491	0.743688	556.994	5.89588	564.554	6.43415	595.118	21.5031	556.994	5.89588	93.5939
-Spot 198	124.366	140800	3.55456	17.0541	0.86049	0.729563	1.48785	0.0902772	1.21378	0.815794	557.176	6.47889	556.297	6.37268	552.71	18.7942	557.176	6.47889	100.808
-Spot 27	49.3154	78956.9	2.39359	16.6407	1.15834	0.747712	1.82658	0.0902806	1.41232	0.773204	557.196	7.53891	566.896	7.93492	605.98	25.0685	557.196	7.53891	91.9496
-Spot 252	43.7137	14788.5	1.26244	16.8056	0.957807	0.740547	1.91492	0.0903013	1.65817	0.86592	557.319	8.85308	562.725	8.27288	584.662	20.7922	557.319	8.85308	95.3232
-Spot 197	30.7107	11536.5	2.21098	16.7997	1.33552	0.741033	1.88878	0.0903288	1.33562	0.707135	557.481	7.13299	563.008	8.16303	585.425	28.9765	557.481	7.13299	95.2268
-Spot 55	56.6115	35288	2.17344	16.8775	0.906827	0.73764	1.56546	0.0903318	1.27606	0.815135	557.499	6.8151	561.027	6.74782	575.346	19.7086	557.499	6.8151	96.8981
-Spot 100	70.1919	705662	1.97549	16.4395	0.920071	0.757591	1.48298	0.0903673	1.16306	0.78427	557.709	6.21381	572.62	6.49066	632.282	19.8209	557.709	6.21381	88.2058
-Spot 299	182.254	21832.9	0.913227	17.1475	0.62357	0.726438	1.12366	0.0903829	0.934762	0.831888	557.801	4.9949	554.46	4.80084	540.76	13.6152	557.801	4.9949	103.151
-Spot 157	81.6349	10578.7	1.16548	17.1582	0.887347	0.726184	1.47063	0.0904077	1.17276	0.797454	557.948	6.2682	554.311	6.282	539.421	19.4242	557.948	6.2682	103.435
-Spot 49	30.8414	18113.9	1.7205	16.3283	1.02559	0.763375	1.80455	0.0904411	1.48478	0.822797	558.145	7.93858	575.956	7.93233	646.884	22.0391	558.145	7.93858	86.2821
-Spot 84	90.9757	29236.7	1.74874	17.1863	0.989116	0.725975	1.44877	0.0905299	1.05858	0.730674	558.67	5.66495	554.188	6.18761	535.817	21.6527	558.67	5.66495	104.265
-Spot 98	39.1328	9274.17	1.42179	17.1638	1.03437	0.727207	1.5661	0.0905647	1.1759	0.750846	558.876	6.29499	554.913	6.69528	538.663	22.628	558.876	6.29499	103.752
-Spot 253	76.9665	15112.4	1.57674	16.9606	0.825318	0.736566	1.60877	0.0906442	1.38094	0.858381	559.346	7.39859	560.399	6.92868	564.66	17.9757	559.346	7.39859	99.0589
-Spot 87	98.3552	22287.3	2.39599	17.1255	0.910956	0.729695	1.37951	0.0906719	1.03596	0.750961	559.509	5.55188	556.374	5.90925	543.564	19.9127	559.509	5.55188	102.933
-Spot 223	65.2657	10215.7	1.77034	16.6831	0.965973	0.74932	1.46782	0.0907051	1.10516	0.752929	559.706	5.92472	567.83	6.38418	600.479	20.8941	559.706	5.92472	93.2099
-Spot 168	42.4456	18892.1	0.499642	16.7945	1.0645	0.744653	1.73747	0.0907423	1.37319	0.790337	559.926	7.36436	565.117	7.53008	586.084	23.1018	559.926	7.36436	95.5368
-Spot 137	122.693	24200.2	5.12994	16.8143	0.642209	0.743873	1.30173	0.090754	1.13229	0.869831	559.995	6.07315	564.663	5.63819	583.492	13.9532	559.995	6.07315	95.973
-Spot 155	99.9942	31406.1	5.20182	16.7434	0.90568	0.747985	1.37991	0.0908706	1.0411	0.754472	560.684	5.59066	567.054	5.99572	592.707	19.6139	560.684	5.59066	94.5972
-Spot 228	29.0856	11642.1	1.71598	17.1529	1.22245	0.730366	1.60898	0.0909003	1.04616	0.6502	560.859	5.61949	556.768	6.8959	540.079	26.7528	560.859	5.61949	103.848
-Spot 268	106.739	35482	5.40045	16.9753	0.733025	0.738989	1.21592	0.0910212	0.970125	0.797851	561.574	5.21742	561.816	5.24664	562.773	15.9804	561.574	5.21742	99.7869
-Spot 110	42.6677	23781.5	1.65795	16.9825	0.980701	0.738784	1.50446	0.0910349	1.14089	0.758338	561.655	6.13665	561.696	6.49066	561.841	21.3598	561.655	6.13665	99.9669
-Spot 136	98.9939	12448.4	1.83957	16.8267	0.785882	0.74563	1.51838	0.0910356	1.29918	0.855636	561.659	6.98813	565.686	6.5855	581.902	17.0775	561.659	6.98813	96.5212
-Spot 180	88.6407	23647.1	1.28277	17.1616	0.863176	0.731334	1.23695	0.0910669	0.885981	0.716265	561.844	4.76708	557.336	5.30542	538.946	18.8993	561.844	4.76708	104.249
-Spot 300	212.451	33883.6	2.19643	16.9544	0.621314	0.740658	1.47423	0.0911146	1.3369	0.906851	562.126	7.19675	562.79	6.36949	565.495	13.5282	562.126	7.19675	99.4041
-Spot 217	68.039	15824.9	2.96219	16.8232	1.12241	0.746847	1.5589	0.0911649	1.08184	0.693974	562.423	5.82664	566.393	6.76757	582.347	24.374	562.423	5.82664	96.5787
-Spot 237	68.2777	24843.4	5.5845	17.1065	0.986081	0.734858	1.21083	0.0912122	0.702675	0.580326	562.702	3.78631	559.4	5.20782	545.969	21.5662	562.702	3.78631	103.065
-Spot 82	70.2678	17429	1.89738	16.9188	1.03012	0.743127	1.7572	0.0912266	1.42359	0.810147	562.787	7.67204	564.229	7.60667	570.043	22.4166	562.787	7.67204	98.7272
-Spot 109	43.2623	12370.6	1.01847	16.9137	1.04651	0.7434	1.45281	0.0912322	1.00771	0.693626	562.82	5.43104	564.388	6.29028	570.69	22.7494	562.82	5.43104	98.6211
-Spot 35	49.8673	43377.3	1.46465	16.6635	0.981201	0.754792	1.56667	0.0912602	1.22136	0.779586	562.986	6.58437	571.001	6.84253	603.021	21.2227	562.986	6.58437	93.361
-Spot 261	43.2501	5030.87	1.98559	16.5926	1.95654	0.758152	2.21393	0.0912761	1.03608	0.46798	563.08	5.58641	572.943	9.69409	612.249	42.2976	563.08	5.58641	91.9692
-Spot 113	171.635	22565.8	1.82076	17.0108	0.834945	0.739538	1.41355	0.0912795	1.14061	0.806911	563.1	6.15024	562.136	6.10201	558.216	18.2146	563.1	6.15024	100.875
-Spot 11	48.9627	151579	1.14922	16.5486	1.13761	0.760378	1.60693	0.0913015	1.13493	0.706271	563.23	6.12097	574.228	7.04786	617.981	24.5756	563.23	6.12097	91.1404
-Spot 266	81.2519	33394.8	1.8487	16.9719	0.9521	0.741422	1.39284	0.0913025	1.01662	0.729888	563.236	5.48294	563.235	6.02141	563.211	20.7418	563.236	5.48294	100.004
-Spot 62	89.6781	31296	6.1399	16.8483	0.941328	0.747492	1.42709	0.0913796	1.07261	0.751605	563.691	5.78939	566.768	6.19838	579.115	20.4421	563.691	5.78939	97.3367
-Spot 32	85.6455	35768.1	3.64462	16.95	0.708377	0.743484	1.53479	0.0914384	1.36154	0.887116	564.038	7.35322	564.436	6.64568	566.063	15.4242	564.038	7.35322	99.6424
-Spot 42	233.421	86712.6	1.64327	16.9036	0.726078	0.74607	1.30481	0.0915055	1.08413	0.830871	564.435	5.85894	565.941	5.66106	572.005	15.812	564.435	5.85894	98.6765
-Spot 181	49.8595	16151.3	2.08532	17.121	0.901445	0.737307	1.28431	0.0915937	0.91479	0.712283	564.956	4.94817	560.833	5.53445	544.116	19.7022	564.956	4.94817	103.83
-Spot 108	47.9876	11705.2	1.92643	17.1005	1.22676	0.738411	1.58559	0.0916209	1.00456	0.63356	565.116	5.43524	561.478	6.83868	546.74	26.8221	565.116	5.43524	103.361
-Spot 263	59.1297	11533	0.836955	16.8182	1.0468	0.75177	1.55399	0.0917388	1.14852	0.739079	565.812	6.22147	569.251	6.77164	582.988	22.7188	565.812	6.22147	97.0539
-Spot 68	43.1553	21180.6	1.82642	16.9022	1.00565	0.748358	2.15614	0.0917786	1.90725	0.884567	566.047	10.3355	567.271	9.37127	572.162	21.8774	566.047	10.3355	98.9314
-Spot 272	26.4815	24538.8	1.42474	16.7258	1.20718	0.75785	1.87485	0.0919726	1.43449	0.765123	567.193	7.78864	572.769	8.20741	594.939	26.1382	567.193	7.78864	95.3364
-Spot 172	98.8534	28362.1	3.35389	17.0155	0.864514	0.746096	1.60314	0.0921145	1.35007	0.842138	568.031	7.34064	565.957	6.95561	557.643	18.8726	568.031	7.34064	101.863
-Spot 106	48.6404	100553	1.82954	16.5633	1.11731	0.766867	1.79685	0.0921629	1.40723	0.783163	568.316	7.6551	577.964	7.91893	616.055	24.1471	568.316	7.6551	92.2508
-Spot 116	166.101	37984	1.79472	16.5853	0.672188	0.766027	1.38717	0.0921841	1.21343	0.87475	568.441	6.60226	577.481	6.10959	613.191	14.5116	568.441	6.60226	92.7022
-Spot 72	85.0004	52607.4	1.04668	16.7156	0.713458	0.760614	1.50462	0.0922515	1.32471	0.880429	568.839	7.21256	574.364	6.60028	596.309	15.4365	568.839	7.21256	95.3934
-Spot 140	97.9428	13771.2	1.22296	17.1209	0.764471	0.742683	3.2702	0.0922609	3.17959	0.972292	568.895	17.3134	563.97	14.152	544.153	16.6914	568.895	17.3134	104.547
-Spot 12	64.1921	14865.2	1.71186	17.0458	0.899747	0.745982	1.57054	0.0922644	1.28726	0.819631	568.915	7.00956	565.89	6.81354	553.76	19.6391	568.915	7.00956	102.737
-Spot 161	60.727	54335.2	1.20626	16.9839	1.10027	0.749089	1.55823	0.0923122	1.10341	0.708114	569.197	6.01127	567.696	6.77626	561.664	23.9781	569.197	6.01127	101.341
-Spot 46	21.6277	4600.18	0.900804	16.9987	2.35487	0.749837	2.66465	0.0924847	1.24697	0.467969	570.215	6.80502	568.13	11.5947	559.771	51.3268	570.215	6.80502	101.866
-Spot 301	67.4806	208486	1.8085	16.7273	0.703255	0.762131	1.33349	0.0925001	1.13297	0.84963	570.306	6.18385	575.239	5.8562	594.789	15.2184	570.306	6.18385	95.8838
-Spot 290	148.048	296399	2.43301	16.7856	0.935024	0.759715	1.5935	0.0925283	1.29034	0.80975	570.473	7.04471	573.846	6.98549	587.249	20.2679	570.473	7.04471	97.1433
-Spot 132	160.703	1.40191e+06	4.02047	16.9875	0.529038	0.751358	1.00394	0.0926112	0.853234	0.849888	570.962	4.66213	569.012	4.37332	561.206	11.5094	570.962	4.66213	101.738
-Spot 70	64.4844	41612.6	1.20163	16.654	0.949559	0.766539	1.53225	0.0926279	1.20255	0.784826	571.06	6.57188	577.776	6.75112	604.25	20.5449	571.06	6.57188	94.5072
-Spot 151	110.339	26752.7	3.93764	17.0227	0.765979	0.75207	1.25404	0.092891	0.992924	0.791779	572.613	5.44041	569.425	5.46579	556.695	16.719	572.613	5.44041	102.859
-Spot 17	43.9803	46629.5	1.56036	16.6322	1.08314	0.770037	1.77375	0.0929283	1.40463	0.7919	572.832	7.69905	579.784	7.83538	607.097	23.4439	572.832	7.69905	94.356
-Spot 133	91.5862	12145.8	0.857936	17.0003	0.904711	0.755127	1.28951	0.0931461	0.918872	0.712576	574.117	5.04731	571.195	5.63339	559.581	19.7324	574.117	5.04731	102.598
-Spot 22	56.8634	9087.04	3.2588	16.632	1.35842	0.772751	1.95631	0.0932552	1.40777	0.719607	574.76	7.74109	581.34	8.65903	607.112	29.3765	574.76	7.74109	94.6712
-Spot 3	34.9738	14536.5	1.98653	17.0348	1.36346	0.754904	2.0645	0.0933075	1.55021	0.750889	575.069	8.52873	571.066	9.0177	555.183	29.7451	575.069	8.52873	103.582
-Spot 99	210.966	22350.3	0.926257	16.2223	0.815376	0.79283	1.32299	0.0933212	1.04185	0.7875	575.149	5.73267	592.776	5.94061	660.814	17.4548	575.149	5.73267	87.0365
-Spot 126	234.936	108611	2.61395	16.9134	0.64725	0.760688	1.33701	0.0933526	1.1699	0.875011	575.335	6.4392	574.407	5.86534	570.717	14.1022	575.335	6.4392	100.809
-Spot 215	28.5561	45660.7	1.52589	16.3605	1.26538	0.786624	1.6178	0.0933794	1.00802	0.623079	575.493	5.54967	589.255	7.23263	642.645	27.2125	575.493	5.54967	89.5507
-Spot 121	205.597	77701.7	6.82703	17.045	0.77788	0.755828	1.32636	0.0934775	1.0743	0.809964	576.071	5.92027	571.601	5.79743	553.855	16.9729	576.071	5.92027	104.011
-Spot 208	214.257	34519.1	1.194	16.247	0.833015	0.796879	1.2165	0.0939404	0.886539	0.728763	578.799	4.90766	595.066	5.47796	657.577	17.8443	578.799	4.90766	88.02
-Spot 52	20.6164	6920.53	0.844958	16.7816	1.24682	0.771631	1.60357	0.0939571	1.0084	0.628847	578.898	5.58318	580.698	7.09189	587.749	27.0415	578.898	5.58318	98.494
-Spot 14	79.2036	30771.5	5.81237	16.7533	0.903088	0.775228	1.66593	0.0942362	1.39991	0.840318	580.542	7.77186	582.758	7.38701	591.398	19.581	580.542	7.77186	98.1644
-Spot 58	55.0783	99386.2	1.36225	16.6626	0.773234	0.779451	1.18053	0.0942364	0.892053	0.755638	580.543	4.95241	585.17	5.25065	603.146	16.7139	580.543	4.95241	96.2525
-Spot 101	82.5883	12280.3	1.37046	16.7615	1.03013	0.77531	1.76005	0.0942923	1.4271	0.810827	580.872	7.92711	582.805	7.80486	590.361	22.3191	580.872	7.92711	98.3928
-Spot 297	129.689	211236	1.62512	16.9907	0.887129	0.76663	1.64396	0.0945116	1.38406	0.841904	582.164	7.70438	577.828	7.24386	560.809	19.332	582.164	7.70438	103.808
-Spot 56	154.306	135738	1.45927	16.8601	0.748985	0.774997	1.43643	0.0948089	1.2257	0.853299	583.915	6.8425	582.625	6.36828	577.605	16.288	583.915	6.8425	101.092
-Spot 257	76.0949	23574	1.40238	16.8638	1.00416	0.775505	1.66006	0.0948915	1.32192	0.796306	584.402	7.38549	582.916	7.36249	577.131	21.8142	584.402	7.38549	101.26
-Spot 226	50.849	15334.1	1.0978	16.9614	1.03125	0.774318	1.70662	0.0952946	1.3598	0.796782	586.774	7.62662	582.237	7.56246	564.558	22.4613	586.774	7.62662	103.935
-Spot 213	126.396	143157	1.62681	16.4788	0.878219	0.797466	1.41664	0.0953511	1.11158	0.784657	587.107	6.23778	595.398	6.38186	627.095	18.9494	587.107	6.23778	93.6232
-Spot 147	298.773	28040.1	1.6602	16.5028	0.639376	0.802021	1.4066	0.0960352	1.25289	0.89072	591.132	7.07681	597.968	6.35673	623.96	13.8092	591.132	7.07681	94.7388
-Spot 36	18.8626	23011.8	1.70853	16.0735	1.58361	0.824322	2.20041	0.0961378	1.52773	0.694295	591.735	8.63763	610.457	10.0958	680.535	33.8312	591.735	8.63763	86.9515
-Spot 207	150.815	430579	1.66487	16.9294	0.682535	0.785506	1.51084	0.0964893	1.34788	0.89214	593.802	7.64616	588.619	6.74904	568.703	14.8484	593.802	7.64616	104.413
-Spot 287	41.6145	19295.6	1.29	16.1942	0.851531	0.825702	1.24479	0.0970222	0.907958	0.729409	596.934	5.17654	611.224	5.7164	664.564	18.2393	596.934	5.17654	89.8234
-Spot 309	21.4195	5414.32	1.70002	16.4172	1.24641	0.815935	1.67985	0.0971949	1.12622	0.670425	597.949	6.43132	605.778	7.66417	635.196	26.8282	597.949	6.43132	94.1361
-Spot 39	232.389	101055	0.912221	16.6749	0.709232	0.805857	1.56752	0.097501	1.3979	0.891788	599.747	8.00567	600.127	7.10273	601.541	15.3512	599.747	8.00567	99.7018
-Spot 267	45.3162	174729	1.418	16.3127	0.832583	0.824669	1.43822	0.0976097	1.17273	0.8154	600.385	6.72295	610.65	6.6002	648.891	17.8613	600.385	6.72295	92.5248
-Spot 275	67.1382	7596.03	1.14324	15.6128	1.44233	0.865736	1.92258	0.0980742	1.27121	0.661201	603.113	7.31911	633.249	9.05858	742.339	30.5041	603.113	7.31911	81.245
-Spot 305	55.0205	12010.9	1.9606	16.7392	1.13336	0.8077	1.66253	0.098101	1.21634	0.731622	603.27	7.00495	601.163	7.54276	593.211	24.5466	603.27	7.00495	101.696
-Spot 251	37.0522	45558.7	1.28965	16.0913	1.07857	0.841885	1.64853	0.098295	1.24673	0.756267	604.409	7.19289	620.185	7.65113	678.167	23.0552	604.409	7.19289	89.124
-Spot 103	204.034	128700	3.17455	16.6506	0.717176	0.818765	1.23639	0.0989183	1.00713	0.814576	608.067	5.84409	607.359	5.65162	604.701	15.5009	608.067	5.84409	100.557
-Spot 175	39.1736	7701.17	1.44754	16.8209	1.13883	0.81252	1.57399	0.099168	1.08651	0.69029	609.532	6.31916	603.867	7.16457	582.641	24.7287	609.532	6.31916	104.615
-Spot 71	80.649	76016	1.51954	16.1611	0.960599	0.849941	1.4613	0.0996662	1.10121	0.753579	612.453	6.43391	624.617	6.81723	668.933	20.5688	612.453	6.43391	91.5567
-Spot 28	121.184	160427	1.07974	16.1965	0.82618	0.849926	1.44181	0.0998823	1.18163	0.819546	613.719	6.91741	624.608	6.72624	664.27	17.6767	613.719	6.91741	92.39
-Spot 216	205.607	31275.1	10.4817	16.6409	0.592939	0.827503	1.03116	0.099916	0.84363	0.818138	613.916	4.94021	612.226	4.741	605.954	12.8096	613.916	4.94021	101.314
-Spot 249	75.2583	27853.1	4.05271	16.5342	0.880739	0.833583	1.61572	0.100004	1.35457	0.838367	614.434	7.9386	615.598	7.45852	619.861	19.0264	614.434	7.9386	99.1245
-Spot 152	124.565	114125	1.68059	16.4302	0.765704	0.841786	1.40459	0.100353	1.17753	0.838343	616.48	6.92295	620.131	6.51852	633.496	16.4986	616.48	6.92295	97.3139
-Spot 75	98.0208	33487.5	1.5937	16.4019	0.824307	0.844282	1.30076	0.100478	1.00623	0.77357	617.208	5.92249	621.506	6.04635	637.206	17.7566	617.208	5.92249	96.8616
-Spot 102	70.2515	193640	1.2428	16.4615	0.683444	0.841385	1.05456	0.100497	0.803118	0.761568	617.32	4.72783	619.91	4.89277	629.396	14.7457	617.32	4.72783	98.0813
-Spot 115	90.5348	46501.4	5.25379	16.4633	0.763872	0.84196	1.39547	0.100576	1.16783	0.836875	617.784	6.87976	620.227	6.4769	629.168	16.479	617.784	6.87976	98.1907
-Spot 18	110.631	12422.3	1.03496	16.7239	1.03202	0.82914	1.62388	0.100613	1.25376	0.772078	617.998	7.38842	613.135	7.47433	595.216	22.3539	617.998	7.38842	103.828
-Spot 245	100.915	113346	1.7585	16.4095	0.60808	0.845359	1.13779	0.100652	0.961666	0.845206	618.231	5.66913	622.099	5.29243	636.211	13.0957	618.231	5.66913	97.1739
-Spot 145	67.437	32464.9	3.37673	16.4348	0.808824	0.858378	1.57385	0.10236	1.35011	0.857841	628.227	8.08158	629.237	7.38151	632.891	17.4179	628.227	8.08158	99.2631
-Spot 214	265.762	16878.4	1.54849	16.0266	0.785297	0.882554	1.3375	0.102629	1.08268	0.809486	629.798	6.49622	642.361	6.36681	686.77	16.7596	629.798	6.49622	91.7043
-Spot 190	113.486	30500	2.04904	16.5254	0.772185	0.859271	1.35308	0.103031	1.11111	0.821168	632.149	6.69045	629.725	6.34961	621.009	16.6797	632.149	6.69045	101.794
-Spot 23	112.579	27647.9	0.87457	16.4196	0.763352	0.864945	1.28184	0.103048	1.02976	0.803346	632.244	6.20151	632.819	6.03658	634.893	16.4409	632.244	6.20151	99.5828
-Spot 170	208.534	138771	2.74413	16.5856	0.758609	0.858867	1.52839	0.103358	1.32683	0.868125	634.058	8.01238	629.504	7.17048	613.16	16.4089	634.058	8.01238	103.408
-Spot 8	67.0463	33339	5.06506	16.4623	0.820932	0.871302	1.41043	0.104075	1.1469	0.813157	638.246	6.96934	636.274	6.66825	629.299	17.7075	638.246	6.96934	101.422
-Spot 43	202.467	286271	1.8041	16.3378	0.702524	0.88029	1.54468	0.104354	1.37568	0.890592	639.872	8.3798	641.14	7.34304	645.627	15.0747	639.872	8.3798	99.1087
-Spot 143	11.1982	29628.3	2.0811	16.2555	1.24831	0.889151	1.97003	0.104873	1.52406	0.773621	642.905	9.3255	645.913	9.41508	656.421	26.7749	642.905	9.3255	97.941
-Spot 178	101.339	19583.8	2.20713	15.1046	0.910365	0.992204	1.70138	0.108742	1.43734	0.844805	665.438	9.08748	699.844	8.60417	811.975	19.0447	665.438	9.08748	81.953
-Spot 107	14.72	5118.12	2.75934	15.781	1.47245	1.01904	1.87482	0.116685	1.16054	0.619013	711.456	7.81741	713.433	9.60838	719.638	31.2368	711.456	7.81741	98.8631
-Spot 134	110.609	58038.5	2.25271	15.272	0.961798	1.12726	2.00785	0.124913	1.7625	0.877805	758.78	12.6164	766.446	10.8039	788.841	20.1887	758.78	12.6164	96.1892
-Spot 54	213.113	203977	2.19144	15.2117	0.621434	1.1587	1.17597	0.12789	0.998366	0.848969	775.817	7.29756	781.343	6.40932	797.14	13.0465	775.817	7.29756	97.3251
-Spot 15	54.0967	65462.2	1.63793	15.101	0.734609	1.18649	1.38682	0.130004	1.17627	0.84818	787.89	8.72377	794.333	7.64144	812.476	15.372	787.89	8.72377	96.9739
-Spot 26	226.852	496027	2.50387	15.2392	0.856931	1.1875	1.54403	0.131305	1.2844	0.831852	795.308	9.60997	794.799	8.51098	793.349	17.995	795.308	9.60997	100.247
-Spot 89	112.462	40566.4	3.31372	13.6593	0.601815	1.78696	1.19633	0.177105	1.03393	0.864256	1051.14	10.0283	1040.72	7.78884	1018.88	12.1867	1018.88	12.1867	103.167
-Spot 60	8.24609	91321.9	137041	13.5679	2.95263	1.64115	4.50292	0.161566	3.39974	0.755008	965.474	30.4841	986.155	28.4179	1032.45	59.6999	1032.45	59.6999	93.5126
-Spot 78	44.9886	23897.4	2.33238	13.4889	0.800475	1.61455	1.27967	0.158022	0.998401	0.7802	945.773	8.7826	975.877	8.02404	1044.29	16.1668	1044.29	16.1668	90.5663
-Spot 202	179.643	84575.6	1.53873	13.0656	0.788046	1.95696	1.33646	0.185524	1.0794	0.807657	1097.08	10.889	1100.84	8.98117	1108.26	15.7453	1108.26	15.7453	98.9914
-Spot 111	91.9571	31167.9	2.49998	12.6933	0.735782	2.15195	1.17587	0.198197	0.917221	0.780036	1165.63	9.7805	1165.68	8.15177	1165.77	14.5972	1165.77	14.5972	99.9877
-Spot 86	76.5381	35262.8	3.57338	12.5282	0.823997	1.87574	1.51242	0.17051	1.26824	0.838552	1014.92	11.9095	1072.56	10.017	1191.66	16.2553	1191.66	16.2553	85.1683
-Spot 25	242.039	138001	1.81574	12.4602	0.650463	2.20478	1.39395	0.199332	1.23288	0.884451	1171.73	13.2092	1182.56	9.7377	1202.4	12.8095	1202.4	12.8095	97.4496
-Spot 117	74.2819	38478.5	2.18792	8.91249	0.676372	4.0017	1.2871	0.25878	1.09505	0.850792	1483.6	14.5122	1634.54	10.4564	1834.58	12.2549	1834.58	12.2549	80.8684
-Spot 192	83.3265	33638.3	2.69724	8.70312	0.68133	5.21721	1.25546	0.329459	1.05449	0.839929	1835.76	16.8457	1855.43	10.6977	1877.54	12.2807	1877.54	12.2807	97.7747
-Spot 73	144.971	74577.2	5.80249	8.24316	0.83544	6.27141	1.47829	0.375099	1.21958	0.824995	2053.35	21.4458	2014.47	12.9467	1974.83	14.8841	1974.83	14.8841	103.976
-Spot 127	29.3542	12623.4	1.88187	8.17253	0.787965	5.57683	1.63877	0.330698	1.4369	0.876816	1841.76	23.0197	1912.53	14.1107	1990.15	14.013	1990.15	14.013	92.544
-Spot 74	29.9011	21142.4	1.54638	8.13409	0.998361	6.09163	1.5842	0.359526	1.23002	0.776432	1979.93	20.9689	1989.05	13.8182	1998.53	17.7382	1998.53	17.7382	99.0692
-Spot 188	32.6817	30363.8	1.95562	8.06311	0.836295	6.12644	1.48188	0.358426	1.22334	0.825536	1974.71	20.808	1994.02	12.936	2014.08	14.8316	2014.08	14.8316	98.0448
-Spot 304	425.801	362066	1.75021	8.04286	0.675024	6.18191	1.40959	0.360762	1.23745	0.87788	1985.78	21.1488	2001.89	12.3204	2018.55	11.9669	2018.55	11.9669	98.3769
-Spot 296	341.016	39189.2	3.61791	8.04113	0.853568	6.13058	1.60323	0.35769	1.35712	0.84649	1971.21	23.0485	1994.61	13.9968	2018.93	15.1316	2018.93	15.1316	97.6368
-Spot 298	180.269	162323	1.31593	8.02416	0.740523	6.16631	1.20963	0.359015	0.956473	0.790713	1977.5	16.2885	1999.69	10.5689	2022.67	13.1218	2022.67	13.1218	97.7669
-Spot 130	265.73	52914.1	1.25644	8.00851	0.63187	6.11376	1.18243	0.355261	0.999435	0.845241	1959.67	16.8888	1992.21	10.3188	2026.13	11.1899	2026.13	11.1899	96.7201
-Spot 7	231.91	337985	1.41666	7.9579	0.749924	6.19374	1.30402	0.357635	1.06681	0.818092	1970.95	18.116	2003.57	11.4007	2037.35	13.2639	2037.35	13.2639	96.7412
-Spot 139	56.6003	250450	1.10455	7.88847	0.831878	5.79293	2.16645	0.331573	2.00037	0.923341	1846	32.1105	1945.35	18.7616	2052.83	14.6898	2052.83	14.6898	89.9245
-Spot 236	167.335	107372	2.02093	7.88146	0.544975	6.24236	1.11107	0.356979	0.968239	0.871444	1967.84	16.4199	2010.4	9.72422	2054.4	9.6217	2054.4	9.6217	95.7865
-Spot 29	137.573	181925	0.778173	7.87305	0.786164	5.40413	1.51423	0.308714	1.29416	0.854664	1734.38	19.6798	1885.51	12.9752	2056.29	13.8771	2056.29	13.8771	84.3451
-Spot 150	180.928	775658	4.1695	7.836	0.759168	5.7927	1.42067	0.329354	1.20082	0.845249	1835.25	19.1787	1945.32	12.3022	2064.61	13.3856	2064.61	13.3856	88.8909
-Spot 16	96.3639	66805.3	0.914783	7.83198	0.797482	6.17479	1.50271	0.350899	1.27364	0.847563	1938.89	21.3269	2000.89	13.1324	2065.52	14.0599	2065.52	14.0599	93.8694
-Spot 20	178.382	189984	2.37408	7.82995	0.671951	6.04136	1.34282	0.343227	1.1626	0.865792	1902.18	19.1506	1981.83	11.6989	2065.97	11.8457	2065.97	11.8457	92.0717
-Spot 6	64.378	30076	1.6051	7.82781	0.722952	6.01188	1.77311	0.341459	1.61903	0.913102	1893.69	26.5666	1977.57	15.4374	2066.45	12.7443	2066.45	12.7443	91.6394
-Spot 10	144.823	5.55573e+06	2.46483	7.75723	0.809875	6.71346	1.56046	0.377869	1.33384	0.854775	2066.32	23.5807	2074.39	13.7913	2082.4	14.2512	2082.4	14.2512	99.2277
-Spot 274	126.074	70562.4	2.01888	7.72185	0.574811	6.637	1.19629	0.371861	1.04914	0.876998	2038.15	18.3326	2064.28	10.5568	2090.45	10.1071	2090.45	10.1071	97.4984
-Spot 104	286.814	185935	4.40434	7.63366	0.55374	6.28776	1.27748	0.34827	1.15123	0.901172	1926.33	19.17	2016.75	11.1919	2110.62	9.71224	2110.62	9.71224	91.2686
-Spot 24	69.2072	34924.2	4.09664	7.56632	0.696338	6.65295	1.33333	0.365247	1.13705	0.85279	2007	19.6099	2066.4	11.7699	2126.15	12.195	2126.15	12.195	94.3958
-Spot 37	94.7681	982113	1.93656	7.52713	0.642133	7.2207	1.31512	0.394363	1.14769	0.872692	2143.03	20.925	2139.06	11.7296	2135.24	11.2342	2135.24	11.2342	100.365
-Spot 173	222.984	165890	1.74781	7.43692	0.645718	7.11324	1.33262	0.383838	1.16573	0.874764	2094.19	20.8439	2125.7	11.8639	2156.3	11.2684	2156.3	11.2684	97.1195
-Spot 154	183.934	224675	2.89084	7.38215	0.629948	7.41361	1.28764	0.397101	1.12302	0.872157	2155.68	20.577	2162.61	11.521	2169.19	10.9797	2169.19	10.9797	99.3768
-Spot 244	114.314	38850.2	1.59268	7.27344	0.644628	7.4771	1.02473	0.394603	0.796574	0.777349	2144.14	14.5297	2170.25	9.17779	2195.01	11.2015	2195.01	11.2015	97.6826
-Spot 146	124.628	588039	1.35701	6.91938	0.753226	8.27989	1.36014	0.4157	1.13254	0.83266	2240.93	21.4378	2262.12	12.323	2281.33	12.9699	2281.33	12.9699	98.2292
-Spot 93	374.68	153009	5.87625	6.13886	0.521422	10.2547	1.24468	0.456769	1.1302	0.908023	2425.28	22.8444	2458.02	11.5158	2485.2	8.79133	2485.2	8.79133	97.5887
-Spot 47	220.128	430503	5.75429	6.07039	0.690988	8.5273	1.50532	0.375592	1.33736	0.888421	2055.66	23.5394	2288.84	13.6813	2504.1	11.6254	2504.1	11.6254	82.0919
-Spot 269	83.2019	383867	0.935093	5.26086	0.614418	12.9988	1.30532	0.496191	1.15168	0.882292	2597.41	24.6214	2679.57	12.3078	2742.15	10.1033	2742.15	10.1033	94.7217
-Spot 114	258.25	141154	1.2456	5.21819	0.563331	12.7752	1.20655	0.483701	1.06697	0.884313	2543.36	22.4234	2663.22	11.3622	2755.54	9.25481	2755.54	9.25481	92.3002
-Spot 57	300.664	103204	3.44295	5.20094	0.689062	12.4494	1.17432	0.469806	0.950907	0.80975	2482.71	19.5937	2638.92	11.0377	2760.97	11.3147	2760.97	11.3147	89.9215
-Spot 153	186.96	32082.6	1.78951	4.04217	0.86468	20.0976	1.38885	0.58945	1.08684	0.78255	2987.19	25.9829	3096.07	13.4345	3167.45	13.7066	3167.45	13.7066	94.309

## Sheet: Amoco Stumberg
Table _____. U-Pb geochronologic analyses.
							Isotope ratios						Apparent ages (Ma)
Analysis	U	206Pb	U/Th	206Pb*	±	207Pb*	±	206Pb*	±	error	206Pb*	±	207Pb*	±	206Pb*	±	Best age	±	Conc
	(ppm)	204Pb		207Pb*	(%)	235U*	(%)	238U	(%)	corr.	238U*	(Ma)	235U	(Ma)	207Pb*	(Ma)	(Ma)	(Ma)	(%)
-GBDS-35 Spot 301	2726.01	38242.9	3.44279	18.1138	0.62931	0.339991	1.2018	0.0446853	1.02386	0.851941	281.809	2.82319	297.165	3.09621	419.606	14.0524	281.809	2.82319	NA
-GBDS-35 Spot 281	372.463	38843.9	1.86573	19.0024	1.08147	0.337628	1.79921	0.0465517	1.43791	0.799191	293.316	4.12312	295.373	4.61125	311.643	24.6135	293.316	4.12312	NA
-GBDS-35 Spot 103	2427.42	106066	4.96739	18.1464	0.804727	0.368568	1.59354	0.0485284	1.37542	0.863123	305.481	4.10363	318.592	4.35759	415.588	17.9823	305.481	4.10363	NA
-GBDS-35 Spot 200	1324.32	392430	1.58726	18.7837	0.765396	0.376058	1.50741	0.0512537	1.29863	0.861501	322.214	4.08153	324.134	4.18294	337.928	17.3284	322.214	4.08153	NA
-GBDS-35 Spot 160	251.509	16008.8	1.55284	17.9928	0.921231	0.409506	1.55233	0.0534623	1.24942	0.80487	335.743	4.08748	348.519	4.57941	434.545	20.5181	335.743	4.08748	NA
-GBDS-35 Spot 43	309.889	36091.7	5.21463	18.8212	1.03007	0.395604	1.64631	0.0540251	1.28424	0.780074	339.187	4.24336	338.455	4.73851	333.437	23.3533	339.187	4.24336	NA
-GBDS-35 Spot 34	330.468	34386.7	0.60471	18.5539	0.926863	0.404974	1.38108	0.0545192	1.02387	0.741355	342.207	3.41239	345.249	4.04213	365.748	20.8819	342.207	3.41239	NA
-GBDS-35 Spot 99	195.032	21424.9	0.805918	18.4319	0.846468	0.418948	1.43275	0.0560297	1.15596	0.806817	351.435	3.95371	355.299	4.29532	380.6	19.0314	351.435	3.95371	NA
-GBDS-35 Spot 238	118.49	33683.5	0.35039	18.1449	1.02284	0.433404	1.57879	0.0570603	1.20265	0.761757	357.723	4.18497	365.591	4.84708	415.779	22.8549	357.723	4.18497	NA
-GBDS-35 Spot 183	696.718	136484	60.3469	18.3819	0.558532	0.428248	1.65018	0.057118	1.55278	0.940978	358.075	5.40851	361.932	5.02407	386.702	12.5443	358.075	5.40851	NA
-GBDS-35 Spot 270	453.71	35200.9	0.914323	18.5745	0.762127	0.424116	1.59458	0.0571596	1.40066	0.878388	358.328	4.88202	358.99	4.8219	363.246	17.1809	358.328	4.88202	NA
-GBDS-35 Spot 12	628.151	52707.3	2.42822	18.5038	0.68881	0.430551	1.34845	0.057806	1.15925	0.859691	362.269	4.08379	363.568	4.12088	371.841	15.51	362.269	4.08379	NA
-GBDS-35 Spot 292	859.365	116667	4.33546	18.4398	0.71255	0.434134	1.54202	0.0580855	1.36751	0.886833	363.972	4.83946	366.108	4.73976	379.634	16.0229	363.972	4.83946	NA
-GBDS-35 Spot 248	278.022	23494.5	2.84679	18.2922	1.11891	0.439175	1.59628	0.0582895	1.13849	0.713212	365.215	4.04233	369.671	4.94614	397.682	25.0817	365.215	4.04233	NA
-GBDS-35 Spot 9	4394.16	91680.7	0.855025	16.7706	0.506418	0.484935	1.06518	0.0590092	0.937097	0.879754	369.597	3.36607	401.453	3.53209	589.164	10.976	369.597	3.36607	NA
-GBDS-35 Spot 304	1854.84	178823	4.43088	18.6989	0.588482	0.435574	1.2588	0.0590972	1.11277	0.883995	370.133	4.00271	367.127	3.87814	348.209	13.3069	370.133	4.00271	NA
-GBDS-35 Spot 151	2553.64	87466.9	5.05167	18.0099	0.843781	0.453887	1.54997	0.0593125	1.30017	0.838836	371.443	4.6929	379.998	4.91331	432.438	18.7995	371.443	4.6929	NA
-GBDS-35 Spot 185	264.687	53323.5	6.40384	18.6413	0.758378	0.4424	1.53037	0.0598382	1.32924	0.868577	374.641	4.83795	371.943	4.76604	355.169	17.127	374.641	4.83795	NA
-GBDS-35 Spot 158	369.701	55976	0.917568	18.3684	0.920527	0.452424	1.52851	0.0602983	1.22024	0.798317	377.439	4.47342	378.975	4.83453	388.351	20.6683	377.439	4.47342	NA
-GBDS-35 Spot 81	1265.57	1.41338e+06	5.03118	18.4907	0.836573	0.454019	1.499	0.0609138	1.24384	0.829782	381.18	4.60383	380.09	4.75268	373.429	18.8222	381.18	4.60383	NA
-GBDS-35 Spot 55	593.772	98183	130.235	18.31	0.84816	0.458594	1.57459	0.0609262	1.32664	0.842528	381.255	4.91122	383.28	5.02685	395.502	19.0184	381.255	4.91122	NA
-GBDS-35 Spot 215	260.829	74088.8	0.795099	18.3955	0.879102	0.465665	1.46017	0.0621545	1.16588	0.798456	388.715	4.39803	388.19	4.7106	385.041	19.7497	388.715	4.39803	NA
-GBDS-35 Spot 155	2969.2	70204	9.75517	17.2071	0.827899	0.502385	1.88649	0.0627237	1.69512	0.898557	392.169	6.44955	413.316	6.40538	533.147	18.1291	392.169	6.44955	NA
-GBDS-35 Spot 207	116.302	27543.7	12.3812	18.1931	1.2223	0.475289	1.70255	0.0627411	1.18519	0.696124	392.274	4.51055	394.835	5.56948	409.842	27.341	392.274	4.51055	NA
-GBDS-35 Spot 240	338.245	270594	2.56432	17.8146	0.984179	0.488666	1.63155	0.063165	1.30129	0.797578	394.845	4.98389	404.001	5.43813	456.67	21.8357	394.845	4.98389	NA
-GBDS-35 Spot 177	729.853	123154	9.73979	18.3691	0.894278	0.474385	1.72479	0.0632277	1.47485	0.855087	395.225	5.65387	394.213	5.63496	388.261	20.0789	395.225	5.65387	NA
-GBDS-35 Spot 214	604.99	46133.4	0.972195	18.1667	0.819323	0.489737	1.37324	0.0645546	1.10204	0.802513	403.265	4.308	404.731	4.58387	413.086	18.3161	403.265	4.308	97.6225
-GBDS-35 Spot 289	665.396	51611.7	10.418	17.9052	0.68223	0.497236	1.1557	0.0645996	0.932845	0.80717	403.538	3.64898	409.829	3.89716	445.406	15.1665	403.538	3.64898	90.5999
-GBDS-35 Spot 66	297.678	64699.9	1.98795	18.1658	0.781541	0.496394	1.3089	0.0654286	1.04996	0.802169	408.556	4.15656	409.259	4.4088	413.204	17.4705	408.556	4.15656	98.8752
-GBDS-35 Spot 148	294.607	70221.1	2.11958	18.0719	0.757563	0.501364	1.33101	0.0657424	1.09439	0.822224	410.454	4.35193	412.625	4.51316	424.769	16.9008	410.454	4.35193	96.6298
-GBDS-35 Spot 300	405.014	168455	2.4412	18.18	0.566791	0.499074	1.29217	0.0658334	1.16123	0.898665	411.004	4.62373	411.075	4.36811	411.453	12.6749	411.004	4.62373	99.8909
-GBDS-35 Spot 233	1286.1	266011	3.65844	18.0926	1.00288	0.501739	1.84377	0.0658666	1.54716	0.83913	411.205	6.16334	412.879	6.25496	422.223	22.384	411.205	6.16334	97.3905
-GBDS-35 Spot 112	169.558	17392.9	1.3703	18.1396	0.973111	0.503142	1.26168	0.0662226	0.803054	0.636495	413.357	3.2153	413.827	4.28818	416.427	21.7418	413.357	3.2153	99.2629
-GBDS-35 Spot 212	748.898	111225	3.15372	18.1302	0.75932	0.504742	1.49549	0.0663987	1.28838	0.861511	414.423	5.17135	414.907	5.09361	417.581	16.9614	414.423	5.17135	99.2435
-GBDS-35 Spot 118	342.654	47920.6	0.970559	17.7918	0.852731	0.515953	1.59779	0.0666067	1.35122	0.845678	415.68	5.43947	422.444	5.52177	459.52	18.9099	415.68	5.43947	90.4594
-GBDS-35 Spot 253	310.032	83167.8	3.6953	18.1976	0.987074	0.504904	1.58611	0.0666671	1.24154	0.78276	416.044	5.00222	415.017	5.4034	409.285	22.0807	416.044	5.00222	101.651
-GBDS-35 Spot 232	385.443	38547.3	0.854878	17.7128	0.763152	0.525581	1.31504	0.0675484	1.07095	0.814385	421.368	4.36832	428.873	4.6002	469.374	16.9052	421.368	4.36832	89.7725
-GBDS-35 Spot 245	645.798	40685.6	1.81273	18.1628	0.640046	0.519046	1.2933	0.0684034	1.12381	0.868953	426.53	4.63827	424.514	4.48711	413.562	14.3066	426.53	4.63827	103.136
-GBDS-35 Spot 40	222.816	38775.4	1.69535	17.6216	1.09918	0.538927	1.42047	0.0689071	0.899744	0.633413	429.568	3.73905	437.717	5.051	480.789	24.299	429.568	3.73905	89.3464
-GBDS-35 Spot 8	99.4749	58905	0.96961	17.8451	1.10562	0.532767	1.4836	0.0689833	0.989272	0.666807	430.027	4.11535	433.644	5.23613	452.879	24.5465	430.027	4.11535	94.9541
-GBDS-35 Spot 28	352.16	202386	1.73215	17.5545	0.895816	0.551326	1.52388	0.0702237	1.23278	0.80897	437.503	5.21449	445.865	5.4991	489.255	19.7635	437.503	5.21449	89.4223
-GBDS-35 Spot 197	249.572	47211.5	3.51198	17.9603	0.985003	0.545001	1.61433	0.0710229	1.27899	0.792276	442.315	5.46747	441.716	5.78222	438.575	21.9223	442.315	5.46747	100.853
-GBDS-35 Spot 100	344.758	171648	2.71798	17.7133	0.924919	0.552844	1.57485	0.071054	1.27463	0.809366	442.503	5.45106	446.858	5.69311	469.319	20.487	442.503	5.45106	94.2861
-GBDS-35 Spot 147	196.468	30707.6	2.61938	17.839	0.969686	0.548958	1.47116	0.0710555	1.10635	0.752027	442.511	4.73147	444.314	5.2941	453.679	21.5311	442.511	4.73147	97.5385
-GBDS-35 Spot 234	131.341	17458.6	0.911173	17.8013	0.844676	0.551198	1.39035	0.0711946	1.10435	0.794298	443.349	4.73156	445.781	5.01646	458.33	18.7354	443.349	4.73156	96.7315
-GBDS-35 Spot 95	403.316	66636.3	1.47291	17.7833	0.820188	0.551836	1.63692	0.0712048	1.41661	0.865415	443.41	6.07025	446.199	5.91052	460.579	18.1853	443.41	6.07025	96.2724
-GBDS-35 Spot 91	935.169	146829	2.08896	17.9655	0.627406	0.54949	1.2055	0.0716286	1.02936	0.853889	445.96	4.43535	444.663	4.34079	437.934	13.9647	445.96	4.43535	101.833
-GBDS-35 Spot 149	229.388	62911.9	1.67048	17.9674	0.881718	0.550365	1.56242	0.0717502	1.28985	0.825549	446.692	5.56657	445.236	5.63181	437.698	19.6368	446.692	5.56657	102.055
-GBDS-35 Spot 57	693.204	78425.9	3.92731	17.8436	0.668321	0.555823	1.48033	0.0719627	1.32088	0.892287	447.97	5.71622	448.804	5.36993	453.063	14.8472	447.97	5.71622	98.8758
-GBDS-35 Spot 26	231.193	92519.7	2.37824	17.8739	0.961423	0.557725	1.4824	0.0723315	1.12835	0.761163	450.187	4.90636	450.045	5.38925	449.296	21.3686	450.187	4.90636	100.198
-GBDS-35 Spot 141	412.867	52862.6	1.94523	18.0169	1.00096	0.553935	1.64376	0.0724148	1.30386	0.793214	450.687	5.6756	447.571	5.94977	431.568	22.3129	450.687	5.6756	104.43
-GBDS-35 Spot 132	110.371	83994.6	1.41093	17.791	1.58504	0.564721	1.90636	0.0728991	1.05917	0.5556	453.598	4.63925	454.595	6.98615	459.634	35.1584	453.598	4.63925	98.6869
-GBDS-35 Spot 37	334.36	4.04651e+06	1.35282	17.7588	0.952623	0.570871	1.50799	0.0735597	1.16899	0.775198	457.566	5.16348	458.577	5.56454	463.641	21.1146	457.566	5.16348	98.6899
-GBDS-35 Spot 164	1086.58	540602	2.39267	17.7827	0.789312	0.57497	1.46821	0.0741876	1.238	0.843199	461.335	5.51174	461.224	5.44247	460.647	17.4992	461.335	5.51174	100.15
-GBDS-35 Spot 258	566.703	119612	3.2351	17.7687	0.794818	0.582128	1.6694	0.0750521	1.46805	0.879386	466.521	6.60681	465.828	6.23696	462.433	17.6167	466.521	6.60681	100.884
-GBDS-35 Spot 288	195.72	41421.7	8.39867	17.5683	0.794269	0.607514	1.4786	0.0774416	1.24715	0.843469	480.834	5.77853	481.991	5.67395	487.522	17.5282	480.834	5.77853	98.6282
-GBDS-35 Spot 250	435.689	4.86717e+06	1.2354	17.238	0.769908	0.644826	1.63917	0.0806523	1.44711	0.88283	500.015	6.96226	505.289	6.52503	529.261	16.8493	500.015	6.96226	94.4742
-GBDS-35 Spot 119	104.468	29157.6	2.08095	16.7248	1.25723	0.700193	1.96604	0.0849702	1.51152	0.768813	525.721	7.63098	538.906	8.22151	595.089	27.2226	525.721	7.63098	88.3433
-GBDS-35 Spot 180	415.006	294893	0.631488	16.7961	0.83102	0.707537	1.50488	0.0862276	1.25462	0.8337	533.188	6.42028	543.283	6.33163	585.879	18.015	533.188	6.42028	91.0065
-GBDS-35 Spot 153	435.674	142465	4.3545	17.1497	1.00874	0.707195	1.46999	0.088	1.06926	0.727393	543.698	5.57512	543.079	6.18308	540.489	22.0617	543.698	5.57512	100.594
-GBDS-35 Spot 85	398.628	102513	1.04227	16.8579	0.861874	0.719872	1.26991	0.0880537	0.932656	0.734426	544.016	4.86561	550.591	5.39717	577.907	18.733	544.016	4.86561	94.1356
-GBDS-35 Spot 120	49.6827	27616	1.04643	16.9948	1.24054	0.72073	1.56553	0.0888741	0.954954	0.609987	548.875	5.02456	551.098	6.65821	560.281	27.0489	548.875	5.02456	97.9642
-GBDS-35 Spot 296	118.104	60031	1.61854	16.3588	1.23893	0.758458	1.75146	0.0900266	1.238	0.706842	555.694	6.59134	573.12	7.67073	642.865	26.6424	555.694	6.59134	86.4403
-GBDS-35 Spot 279	188.766	298148	15.652	17.0076	1.11053	0.729784	1.96038	0.0900589	1.6155	0.824072	555.885	8.60402	556.427	8.39815	558.636	24.2032	555.885	8.60402	99.5075
-GBDS-35 Spot 64	442.015	281477	1.29707	16.72	0.730226	0.742996	1.65949	0.0901388	1.49019	0.897983	556.358	7.94312	564.152	7.18293	595.707	15.8163	556.358	7.94312	93.3946
-GBDS-35 Spot 282	493.001	110739	1.56742	16.5691	0.839874	0.788007	1.54242	0.0947362	1.2937	0.83875	583.487	7.21705	590.041	6.90239	615.308	18.1491	583.487	7.21705	94.8284
-GBDS-35 Spot 173	155.769	186343	1.86595	16.4943	1.13518	0.792722	1.69344	0.0948728	1.25663	0.742057	584.291	7.01946	592.715	7.60355	625.073	24.4884	584.291	7.01946	93.4758
-GBDS-35 Spot 222	511.555	1.51157e+06	17.1487	16.2941	0.651137	0.811296	1.21785	0.0959173	1.02917	0.845067	590.438	5.80661	603.181	5.53883	651.356	13.9769	590.438	5.80661	90.6476
-GBDS-35 Spot 257	117.101	82370.6	0.294417	16.4907	1.08321	0.810575	1.66327	0.0969887	1.26219	0.758861	596.737	7.19386	602.776	7.56096	625.532	23.3531	596.737	7.19386	95.3967
-GBDS-35 Spot 309	1250.47	334736	3.20786	16.9004	0.820407	0.795728	1.51851	0.0975773	1.27782	0.841492	600.196	7.3232	594.416	6.83249	572.441	17.8663	600.196	7.3232	104.848
-GBDS-35 Spot 255	156.322	62542.1	1.0859	16.4034	1.05434	0.824796	1.64474	0.0981675	1.26236	0.767509	603.661	7.27443	610.72	7.54863	637.014	22.7072	603.661	7.27443	94.7641
-GBDS-35 Spot 196	40.4691	21160	1.98713	16.5998	1.63934	0.820732	2.00731	0.0988535	1.15838	0.57708	607.687	6.7177	608.457	9.18779	611.306	35.4276	607.687	6.7177	99.408
-GBDS-35 Spot 163	89.1833	13244.2	1.21458	16.2035	1.18292	0.84092	1.77245	0.0988673	1.31995	0.744705	607.767	7.65568	619.653	8.22115	663.332	25.3226	607.767	7.65568	91.6234
-GBDS-35 Spot 23	121.642	26565.8	0.633933	16.7215	0.926018	0.815745	1.43916	0.098973	1.10167	0.765494	608.388	6.39585	605.672	6.56514	595.512	20.0643	608.388	6.39585	102.162
-GBDS-35 Spot 69	57.3359	40321.4	1.58817	16.5473	1.34856	0.828801	1.73318	0.0995098	1.0887	0.628154	611.536	6.35176	612.946	7.97563	618.142	29.1194	611.536	6.35176	98.9312
-GBDS-35 Spot 313	256.767	148078	2.00341	16.2482	0.831127	0.854464	1.47299	0.100736	1.21612	0.825609	618.723	7.17459	627.096	6.89149	657.406	17.823	618.723	7.17459	94.1158
-GBDS-35 Spot 254	100.718	16339.6	1.19459	16.4853	0.975379	0.842714	1.66179	0.100801	1.34543	0.809627	619.1	7.94209	620.642	7.7168	626.25	21.0466	619.1	7.94209	98.8583
-GBDS-35 Spot 128	45.0299	25688.8	2.40191	16.4797	1.3271	0.845649	1.80864	0.101118	1.22882	0.679413	620.957	7.27444	622.258	8.41461	626.974	28.6101	620.957	7.27444	99.0404
-GBDS-35 Spot 181	246.425	69008.5	3.11433	15.8477	0.631709	0.886587	1.12317	0.101947	0.928686	0.826842	625.811	5.53863	644.534	5.3595	710.715	13.4086	625.811	5.53863	88.0537
-GBDS-35 Spot 311	144.678	17379.8	2.22221	16.6043	0.962342	0.854345	1.66497	0.10293	1.35868	0.816041	631.557	8.17392	627.031	7.7891	610.718	20.8073	631.557	8.17392	103.412
-GBDS-35 Spot 61	83.4566	35022.8	1.4354	16.4439	1.18204	0.862956	1.73273	0.102963	1.26694	0.731181	631.748	7.62419	631.735	8.14998	631.709	25.4689	631.748	7.62419	100.006
-GBDS-35 Spot 2	108.499	147238	1.42626	16.0145	1.07422	0.914492	1.48086	0.106263	1.01932	0.688326	651.009	6.31177	659.443	7.18254	688.402	22.9272	651.009	6.31177	94.5681
-GBDS-35 Spot 206	106.636	25932.9	2.41048	15.4885	0.828589	0.99962	1.36013	0.112339	1.07861	0.793018	686.32	7.02226	703.617	6.90406	759.223	17.4756	686.32	7.02226	90.3977
-GBDS-35 Spot 303	174.184	47344.1	5.21179	14.5316	0.894257	1.1744	1.55859	0.123828	1.27652	0.819023	752.557	9.067	788.702	8.54768	892.296	18.4617	752.557	9.067	84.3394
-GBDS-35 Spot 209	692.138	348183	9.79126	14.433	0.920525	1.18958	1.6101	0.124577	1.32101	0.82045	756.854	9.4335	795.766	8.88234	906.345	18.9743	756.854	9.4335	83.5061
-GBDS-35 Spot 4	1422.02	370376	0.959703	15.3101	1.05881	1.13773	1.77136	0.126388	1.42008	0.801689	767.227	10.2719	771.433	9.57273	783.609	22.2435	767.227	10.2719	97.9094
-GBDS-35 Spot 94	72.9748	144181	0.750223	14.4572	1.08792	1.36529	1.83023	0.143218	1.47179	0.804156	862.832	11.8859	874.143	10.7273	902.885	22.4156	862.832	11.8859	95.5639
-GBDS-35 Spot 46	685.32	162404	2.64088	14.2693	0.852272	1.38874	1.63598	0.143785	1.39645	0.853584	866.031	11.3165	884.163	9.6577	929.835	17.4966	866.031	11.3165	93.1382
-GBDS-35 Spot 286	147.144	88336.2	2.47414	14.2374	0.76739	1.57772	1.36764	0.162985	1.13206	0.827745	973.344	10.2273	961.471	8.49975	934.403	15.7327	934.403	15.7327	104.168
-GBDS-35 Spot 166	249.245	104189	0.667324	14.1802	0.982004	1.4646	2.15072	0.150692	1.91344	0.889675	904.84	16.1534	915.907	12.9781	942.648	20.12	942.648	20.12	95.9891
-GBDS-35 Spot 224	205.306	34032.7	6.43494	14.1148	1.08262	1.40728	1.58534	0.144126	1.15812	0.730516	867.951	9.40458	892.01	9.41064	952.132	22.1485	952.132	22.1485	91.1587
-GBDS-35 Spot 47	164.475	128218	3.41914	14.0903	0.841427	1.42094	1.43627	0.145272	1.16399	0.810425	874.405	9.51788	897.756	8.55987	955.669	17.1848	955.669	17.1848	91.4966
-GBDS-35 Spot 113	395.193	440026	1.40755	14.0247	0.64321	1.54483	1.51979	0.157203	1.37697	0.906026	941.217	12.0586	948.433	9.36804	965.221	13.1201	965.221	13.1201	97.5131
-GBDS-35 Spot 280	116.247	34335.2	2.88341	14.0086	0.954664	1.56458	1.47391	0.159031	1.12295	0.761888	951.389	9.93268	956.284	9.13049	967.544	19.4722	967.544	19.4722	98.3303
-GBDS-35 Spot 231	246.557	119579	3.41542	14.0008	0.828675	1.58228	1.67612	0.160741	1.45694	0.869234	960.891	13.0062	963.268	10.4287	968.698	16.911	968.698	16.911	99.1941
-GBDS-35 Spot 122	32.7783	27225.9	2.48617	13.9816	1.27468	1.6561	1.73151	0.168008	1.17189	0.676802	1001.13	10.8665	991.886	10.9626	971.524	26.0009	971.524	26.0009	103.047
-GBDS-35 Spot 83	18.0828	10807.6	2.67904	13.9644	1.2982	1.59694	1.6791	0.161807	1.06493	0.634225	966.813	9.561	969.016	10.4846	973.997	26.4585	973.997	26.4585	99.2624
-GBDS-35 Spot 168	192.636	90746.6	2.82228	13.9487	0.735946	1.64778	1.2763	0.166771	1.04275	0.817009	994.296	9.60801	988.698	8.06508	976.283	14.9916	976.283	14.9916	101.845
-GBDS-35 Spot 302	71.7437	118065	3.92023	13.9002	0.902818	1.62064	1.27914	0.163454	0.906157	0.708411	975.944	8.2067	978.239	8.03224	983.39	18.3801	983.39	18.3801	99.2429
-GBDS-35 Spot 194	66.4228	91861.4	2.64043	13.8452	1.16126	1.52284	1.62477	0.152982	1.13637	0.699407	917.659	9.71981	939.619	9.95862	991.447	23.6146	991.447	23.6146	92.5576
-GBDS-35 Spot 159	125.098	28720.5	3.22298	13.8393	0.723379	1.68658	1.21532	0.169359	0.976586	0.803564	1008.58	9.11779	1003.47	7.74703	992.35	14.7079	992.35	14.7079	101.635
-GBDS-35 Spot 7	125.231	28621.3	5.35688	13.8107	0.702985	1.67314	1.52029	0.167662	1.348	0.886671	999.216	12.4775	998.379	9.66231	996.522	14.2803	996.522	14.2803	100.27
-GBDS-35 Spot 246	110.159	514745	2.3332	13.7999	1.03251	1.67889	1.35676	0.168107	0.880176	0.648735	1001.67	8.16566	1000.56	8.63396	998.105	20.9752	998.105	20.9752	100.357
-GBDS-35 Spot 102	85.7138	157074	4.1196	13.766	0.91605	1.70897	1.42573	0.170698	1.0925	0.766275	1015.96	10.2689	1011.9	9.13289	1003.1	18.576	1003.1	18.576	101.282
-GBDS-35 Spot 39	708.947	666515	3.46285	13.7569	0.824125	1.73465	1.36207	0.173149	1.08446	0.796186	1029.44	10.3181	1021.48	8.77307	1004.45	16.7256	1004.45	16.7256	102.488
-GBDS-35 Spot 121	104.413	95220.9	2.1979	13.7545	0.813506	1.69989	1.18909	0.16965	0.867269	0.729352	1010.18	8.10904	1008.49	7.60202	1004.79	16.4908	1004.79	16.4908	100.536
-GBDS-35 Spot 135	219.316	188000	5.10628	13.743	0.71803	1.69333	1.37795	0.168854	1.17608	0.853504	1005.79	10.9523	1006.02	8.79681	1006.5	14.5681	1006.5	14.5681	99.93
-GBDS-35 Spot 205	75.6444	40644.1	2.79317	13.7418	0.811894	1.71709	1.38855	0.171209	1.12646	0.811246	1018.77	10.6151	1014.94	8.91033	1006.67	16.4619	1006.67	16.4619	101.202
-GBDS-35 Spot 236	94.0762	25228.3	3.91204	13.7331	1.03372	1.71991	1.63275	0.171381	1.26383	0.774054	1019.71	11.9199	1015.99	10.4837	1007.96	20.9622	1007.96	20.9622	101.166
-GBDS-35 Spot 65	58.3026	45235.4	2.42636	13.7188	0.838455	1.68773	1.44504	0.167999	1.17691	0.814451	1001.08	10.9126	1003.91	9.21378	1010.08	16.9934	1010.08	16.9934	99.109
-GBDS-35 Spot 1	324.379	127647	3.12508	13.7127	0.705351	1.72027	1.17654	0.171162	0.941665	0.800366	1018.51	8.87166	1016.12	7.55492	1010.97	14.3013	1010.97	14.3013	100.746
-GBDS-35 Spot 36	30.6957	8173.78	2.12814	13.7117	1.20209	1.64715	2.01929	0.163874	1.6225	0.8035	978.27	14.7268	988.458	12.7587	1011.12	24.3601	1011.12	24.3601	96.7508
-GBDS-35 Spot 161	170.742	76354.3	2.79007	13.6975	0.932396	1.726	1.32803	0.171542	0.945668	0.712086	1020.6	8.92625	1018.26	8.53811	1013.22	18.8913	1013.22	18.8913	100.728
-GBDS-35 Spot 271	138.484	30234.5	3.06974	13.6925	0.945587	1.70003	1.45462	0.168899	1.10535	0.759886	1006.04	10.296	1008.54	9.29995	1013.96	19.1592	1013.96	19.1592	99.2187
-GBDS-35 Spot 285	48.0023	49047.2	1.50642	13.6912	0.91529	1.61887	1.33909	0.16082	0.977448	0.729935	961.333	8.72947	977.553	8.40519	1014.15	18.5486	1014.15	18.5486	94.7916
-GBDS-35 Spot 45	329.196	97580.3	3.93791	13.6822	0.698656	1.69559	1.51676	0.16833	1.34627	0.887596	1002.91	12.504	1006.87	9.68785	1015.49	14.1556	1015.49	14.1556	98.7608
-GBDS-35 Spot 63	764.346	168404	14.7764	13.6783	0.736095	1.67431	1.52249	0.166171	1.33272	0.875354	990.978	12.2419	998.823	9.67878	1016.07	14.9123	1016.07	14.9123	97.5308
-GBDS-35 Spot 54	72.8122	29064.3	2.26722	13.671	0.876831	1.6899	1.28033	0.167629	0.932959	0.728686	999.033	8.63425	1004.73	8.16744	1017.14	17.7603	1017.14	17.7603	98.2193
-GBDS-35 Spot 17	179.44	390484	2.97589	13.6602	0.669806	1.72025	1.3116	0.170505	1.12767	0.859771	1014.89	10.5892	1016.12	8.42213	1018.74	13.5647	1018.74	13.5647	99.6223
-GBDS-35 Spot 60	236.487	107724	1.65648	13.6514	0.816006	1.64202	1.37336	0.162646	1.10465	0.80434	971.467	9.96181	986.488	8.66694	1020.04	16.5221	1020.04	16.5221	95.238
-GBDS-35 Spot 259	131.893	24985.7	2.41824	13.6472	0.928289	1.60788	1.60416	0.159216	1.30828	0.815556	952.418	11.5835	973.284	10.0428	1020.67	18.7937	1020.67	18.7937	93.3131
-GBDS-35 Spot 129	137.344	45405.1	1.24681	13.6469	0.894505	1.70796	1.7513	0.169121	1.50562	0.859719	1007.27	14.0402	1011.52	11.2161	1020.72	18.1094	1020.72	18.1094	98.682
-GBDS-35 Spot 193	128.443	210929	1.93185	13.64	0.751636	1.68354	1.27922	0.16662	1.03511	0.809172	993.459	9.53022	1002.32	8.14894	1021.74	15.2152	1021.74	15.2152	97.2325
-GBDS-35 Spot 144	165.475	115344	1.50765	13.6387	0.665903	1.65228	1.16101	0.16351	0.951063	0.819168	976.254	8.61593	990.426	7.3441	1021.94	13.4787	1021.94	13.4787	95.5298
-GBDS-35 Spot 307	94.1221	2.24726e+06	2.63948	13.6379	0.891762	1.69254	1.48178	0.167484	1.1834	0.798633	998.231	10.9439	1005.72	9.45807	1022.06	18.0492	1022.06	18.0492	97.6689
-GBDS-35 Spot 157	287.676	106163	1.60459	13.6372	0.930907	1.69928	1.27726	0.168142	0.874538	0.684696	1001.87	8.11481	1008.26	8.16463	1022.15	18.8416	1022.15	18.8416	98.0155
-GBDS-35 Spot 184	153.793	213114	4.41075	13.6366	0.803094	1.71896	1.45238	0.170082	1.21014	0.833213	1012.57	11.3396	1015.64	9.32362	1022.25	16.2549	1022.25	16.2549	99.0525
-GBDS-35 Spot 108	62.7132	106862	2.46739	13.6129	1.05106	1.77256	1.51693	0.175081	1.09377	0.721044	1040.05	10.5055	1035.46	9.84754	1025.77	21.2819	1025.77	21.2819	101.392
-GBDS-35 Spot 297	91.3326	69602	3.69043	13.6078	1.12102	1.83415	1.5747	0.181097	1.10588	0.702284	1072.96	10.9308	1057.77	10.348	1026.53	22.6943	1026.53	22.6943	104.524
-GBDS-35 Spot 230	59.2144	24949	0.923846	13.5966	0.967798	1.65425	1.51871	0.1632	1.1704	0.770656	974.534	10.5857	991.177	9.61115	1028.18	19.5897	1028.18	19.5897	94.7823
-GBDS-35 Spot 146	437.246	108297	2.80336	13.5963	0.552995	1.78952	1.16267	0.176541	1.02274	0.879648	1048.05	9.89284	1041.65	7.57358	1028.24	11.1828	1028.24	11.1828	101.927
-GBDS-35 Spot 199	91.0335	37023.3	5.27043	13.58	1.04145	1.7456	1.62873	0.172002	1.25225	0.768853	1023.13	11.8472	1025.54	10.5148	1030.66	21.0714	1030.66	21.0714	99.2697
-GBDS-35 Spot 30	78.3236	19342.6	0.807413	13.5758	1.25408	1.69263	1.76395	0.166731	1.24049	0.703243	994.075	11.4276	1005.76	11.2595	1031.28	25.3673	1031.28	25.3673	96.3921
-GBDS-35 Spot 276	193.244	65888.7	1.45817	13.5663	0.873154	1.80093	1.48467	0.177274	1.20077	0.808779	1052.06	11.6559	1045.79	9.69321	1032.7	17.6637	1032.7	17.6637	101.875
-GBDS-35 Spot 249	777.693	195820	2.11855	13.5645	0.871792	1.83123	1.37884	0.180233	1.06826	0.774753	1068.25	10.5163	1056.72	9.05572	1032.97	17.6355	1032.97	17.6355	103.415
-GBDS-35 Spot 244	289.207	245119	3.5857	13.5638	0.72685	1.7345	1.05017	0.170704	0.757982	0.721774	1015.99	7.12482	1021.42	6.7638	1033.07	14.7063	1033.07	14.7063	98.3468
-GBDS-35 Spot 190	193.267	47382.2	3.32843	13.5581	0.702313	1.76671	1.51166	0.1738	1.33861	0.885523	1033.02	12.7771	1033.31	9.80168	1033.92	14.2089	1033.92	14.2089	99.9126
-GBDS-35 Spot 52	132.873	106268	2.37103	13.5538	0.882508	1.62908	1.80146	0.160211	1.57049	0.871787	957.947	13.98	981.503	11.3347	1034.56	17.8487	1034.56	17.8487	92.5949
-GBDS-35 Spot 308	72.557	234026	1.5266	13.5431	0.92023	1.77952	1.51456	0.174867	1.20294	0.794252	1038.87	11.5421	1038	9.84607	1036.16	18.6043	1036.16	18.6043	100.262
-GBDS-35 Spot 98	301.815	117866	9.69345	13.5393	0.824288	1.73434	1.33199	0.17038	1.0463	0.785518	1014.21	9.819	1021.36	8.57873	1036.72	16.6666	1036.72	16.6666	97.8286
-GBDS-35 Spot 107	321.403	454616	2.51896	13.5347	0.680296	1.64872	1.54073	0.161914	1.38241	0.897241	967.405	12.4184	989.063	9.73827	1037.41	13.7568	1037.41	13.7568	93.2522
-GBDS-35 Spot 89	225.697	115902	2.37491	13.532	0.66246	1.7041	1.07195	0.167318	0.842744	0.786181	997.317	7.78696	1010.07	6.85934	1037.82	13.396	1037.82	13.396	96.0977
-GBDS-35 Spot 252	129.788	193801	2.96266	13.5136	1.04816	1.77765	1.73206	0.174302	1.37892	0.796112	1035.77	13.1941	1037.32	11.2559	1040.56	21.1753	1040.56	21.1753	99.5398
-GBDS-35 Spot 174	462.874	325454	5.07522	13.5119	0.726846	1.8165	1.25787	0.17809	1.02662	0.816153	1056.53	10.0044	1051.42	8.23763	1040.8	14.6891	1040.8	14.6891	101.511
-GBDS-35 Spot 110	44.0476	40531.5	4.67304	13.4959	1.28642	1.78688	1.7556	0.174979	1.19468	0.680494	1039.48	11.469	1040.69	11.4301	1043.23	25.9754	1043.23	25.9754	99.6407
-GBDS-35 Spot 20	117.083	701884	2.33342	13.4956	0.804735	1.77319	1.17969	0.173634	0.862597	0.731206	1032.1	8.22675	1035.69	7.65918	1043.28	16.2555	1043.28	16.2555	98.9282
-GBDS-35 Spot 219	64.8845	55976.9	1.41886	13.4851	0.9454	1.72721	1.49414	0.169	1.15701	0.774366	1006.6	10.7828	1018.71	9.60862	1044.85	19.088	1044.85	19.088	96.3395
-GBDS-35 Spot 191	59.6059	1.10117e+06	1.21852	13.4809	1.07483	1.70908	1.55757	0.167174	1.12729	0.723747	996.52	10.4085	1011.94	9.97775	1045.48	21.6976	1045.48	21.6976	95.3166
-GBDS-35 Spot 284	213.33	108735	3.13778	13.4784	0.640532	1.73341	1.33535	0.169522	1.1717	0.877447	1009.48	10.9484	1021.02	8.59867	1045.86	12.9369	1045.86	12.9369	96.5212
-GBDS-35 Spot 294	247.953	115619	2.82577	13.4746	0.918513	1.72341	1.74683	0.168497	1.48584	0.850597	1003.82	13.812	1017.3	11.2246	1046.42	18.542	1046.42	18.542	95.929
-GBDS-35 Spot 265	427.594	230210	2.26963	13.4667	0.814647	1.79466	1.5306	0.17536	1.2958	0.846594	1041.58	12.4628	1043.52	9.98068	1047.61	16.4448	1047.61	16.4448	99.4242
-GBDS-35 Spot 243	189.025	48187.7	1.62068	13.4659	0.709913	1.73011	1.18768	0.169043	0.952163	0.801698	1006.84	8.87558	1019.79	7.64244	1047.72	14.3324	1047.72	14.3324	96.0977
-GBDS-35 Spot 49	373.373	1.34987e+06	3.26372	13.4564	1.01443	1.72339	2.03034	0.168267	1.75875	0.866235	1002.56	16.3298	1017.29	13.0466	1049.15	20.4682	1049.15	20.4682	95.5586
-GBDS-35 Spot 22	455.817	151760	0.947822	13.4381	0.670296	1.72306	1.5862	0.168006	1.43761	0.906325	1001.11	13.3303	1017.17	10.1916	1051.9	13.5255	1051.9	13.5255	95.1719
-GBDS-35 Spot 11	203.46	110728	1.87283	13.4216	0.634539	1.83443	1.41323	0.178646	1.26276	0.893532	1059.57	12.3381	1057.87	9.2873	1054.37	12.8	1054.37	12.8	100.493
-GBDS-35 Spot 202	230.229	277846	0.911249	13.4188	0.689797	1.76286	1.28378	0.171641	1.08272	0.84338	1021.15	10.2249	1031.9	8.31743	1054.78	13.9125	1054.78	13.9125	96.8112
-GBDS-35 Spot 79	224.368	103580	3.05883	13.4105	0.877938	1.78815	1.36907	0.173995	1.05052	0.76732	1034.08	10.0367	1041.15	8.91569	1056.03	17.6975	1056.03	17.6975	97.9216
-GBDS-35 Spot 210	1008.49	214883	4.91468	13.4083	0.961438	1.7518	1.64075	0.170431	1.32954	0.810329	1014.48	12.4803	1027.83	10.6061	1056.36	19.3737	1056.36	19.3737	96.0359
-GBDS-35 Spot 92	82.8636	138613	2.11779	13.3993	0.881611	1.78587	1.70833	0.173628	1.46327	0.856549	1032.07	13.9551	1040.32	11.1201	1057.72	17.7529	1057.72	17.7529	97.5744
-GBDS-35 Spot 73	88.8308	46470.1	1.49743	13.3865	0.717062	1.83717	1.21707	0.178446	0.983403	0.808008	1058.48	9.59944	1058.85	8.00237	1059.64	14.432	1059.64	14.432	99.8907
-GBDS-35 Spot 275	193.319	237031	2.64299	13.3861	0.876104	1.76048	1.40633	0.17099	1.1001	0.782245	1017.56	10.3554	1031.02	9.10701	1059.71	17.6455	1059.71	17.6455	96.0231
-GBDS-35 Spot 312	160.034	298992	3.28492	13.3839	0.691804	1.76973	1.34764	0.171861	1.15652	0.858182	1022.36	10.9338	1034.42	8.74346	1060.03	13.923	1060.03	13.923	96.4458
-GBDS-35 Spot 145	71.8529	47471.7	1.74568	13.375	1.00485	1.79454	1.77556	0.174155	1.46386	0.82445	1034.96	13.9968	1043.48	11.5778	1061.37	20.2191	1061.37	20.2191	97.5122
-GBDS-35 Spot 241	128.27	55573.9	4.01953	13.332	0.661239	1.72275	1.30595	0.166649	1.12618	0.862342	993.622	10.3702	1017.05	8.39037	1067.85	13.2736	1067.85	13.2736	93.0486
-GBDS-35 Spot 277	422.24	413363	1.93974	13.3276	0.693733	1.88179	1.33759	0.181975	1.14362	0.854989	1077.75	11.3502	1074.69	8.86893	1068.51	13.9441	1068.51	13.9441	100.866
-GBDS-35 Spot 31	487.881	615128	4.20122	13.3207	0.719346	1.92188	1.657	0.185755	1.49272	0.900853	1098.34	15.0744	1088.72	11.0671	1069.55	14.4549	1069.55	14.4549	102.691
-GBDS-35 Spot 16	229.948	210050	1.555	13.3041	0.736605	1.80144	1.2866	0.173897	1.05487	0.819889	1033.55	10.0735	1045.98	8.40081	1072.06	14.7966	1072.06	14.7966	96.408
-GBDS-35 Spot 293	202.15	180457	1.62707	13.2882	0.678294	1.78765	1.22152	0.17236	1.01589	0.83166	1025.1	9.62812	1040.97	7.954	1074.46	13.6023	1074.46	13.6023	95.4057
-GBDS-35 Spot 198	47.4266	31720	0.725855	13.2871	1.07961	1.76214	1.6683	0.169886	1.27187	0.762377	1011.48	11.9063	1031.63	10.8073	1074.63	21.6704	1074.63	21.6704	94.1241
-GBDS-35 Spot 51	125.416	83170.4	2.01129	13.2868	0.774124	1.89387	1.31639	0.182582	1.06471	0.808812	1081.07	10.5969	1078.94	8.74774	1074.66	15.5273	1074.66	15.5273	100.596
-GBDS-35 Spot 111	338.198	1.21909e+06	2.70993	13.2602	0.88495	1.87472	1.84204	0.180374	1.61554	0.877039	1069.02	15.9144	1072.2	12.1981	1078.7	17.7511	1078.7	17.7511	99.1027
-GBDS-35 Spot 21	290.2	333247	1.63588	13.2294	0.653772	1.7135	1.48924	0.16448	1.33806	0.898488	981.625	12.1836	1013.6	9.54907	1083.35	13.0922	1083.35	13.0922	90.6099
-GBDS-35 Spot 140	82.3263	47887.8	2.03903	13.2101	0.689553	1.8985	1.27357	0.181972	1.07075	0.840744	1077.74	10.6268	1080.57	8.47035	1086.27	13.8229	1086.27	13.8229	99.2146
-GBDS-35 Spot 239	105.662	81713.8	0.761303	13.1974	1.10653	1.81357	1.50145	0.173663	1.01486	0.675922	1032.26	9.68035	1050.37	9.82723	1088.18	22.1573	1088.18	22.1573	94.8614
-GBDS-35 Spot 35	55.1117	82538.8	0.947509	13.1881	1.12124	1.80762	1.67584	0.172972	1.24549	0.743204	1028.47	11.8399	1048.22	10.9559	1089.59	22.4474	1089.59	22.4474	94.3903
-GBDS-35 Spot 278	192.314	45764	1.9663	13.1645	1.0274	1.88141	1.79682	0.179711	1.47412	0.820402	1065.39	14.476	1074.56	11.9133	1093.22	20.5737	1093.22	20.5737	97.4549
-GBDS-35 Spot 97	44.9377	51182.1	1.94088	13.1557	0.876544	1.97658	1.5574	0.188677	1.2873	0.826575	1114.2	13.1721	1107.56	10.5013	1094.51	17.5429	1094.51	17.5429	101.799
-GBDS-35 Spot 171	180.211	161810	2.12436	13.1373	1.0385	1.86675	1.83824	0.177944	1.51678	0.825129	1055.73	14.7707	1069.38	12.1548	1097.35	20.7916	1097.35	20.7916	96.2075
-GBDS-35 Spot 42	72.5623	74201.1	2.14838	13.1304	1.14578	1.88035	1.78681	0.179145	1.37109	0.767337	1062.3	13.4283	1074.18	11.8446	1098.37	22.9285	1098.37	22.9285	96.7163
-GBDS-35 Spot 33	1323.38	355736	7.79697	13.0927	0.719186	1.75471	1.51715	0.166695	1.33585	0.880504	993.875	12.3039	1028.9	9.81297	1104.14	14.397	1104.14	14.397	90.0134
-GBDS-35 Spot 223	513.615	237919	3.40019	13.0716	0.679946	2.00957	1.63356	0.190599	1.48532	0.909257	1124.62	15.3284	1118.75	11.0759	1107.34	13.5863	1107.34	13.5863	101.561
-GBDS-35 Spot 269	191.056	94731.5	2.78171	13.0329	0.609262	1.97178	1.11771	0.186461	0.937052	0.838371	1102.18	9.4933	1105.92	7.53022	1113.26	12.1724	1113.26	12.1724	99.0042
-GBDS-35 Spot 220	265.097	239906	1.4808	13.0294	0.759548	1.93468	1.3816	0.182904	1.15408	0.835323	1082.82	11.5035	1093.16	9.24853	1113.83	15.1799	1113.83	15.1799	97.2156
-GBDS-35 Spot 310	546.404	381431	4.81949	13.0217	0.693223	2.06784	1.40815	0.195376	1.22569	0.870428	1150.43	12.9142	1138.22	9.63774	1115.02	13.8375	1115.02	13.8375	103.176
-GBDS-35 Spot 195	102.56	20971	3.04936	12.9587	1.71192	1.67741	2.66856	0.157721	2.04708	0.76711	944.097	17.9779	1000	16.9774	1124.66	34.1246	1124.66	34.1246	83.9453
-GBDS-35 Spot 272	92.5559	175120	3.40036	12.9221	0.856345	1.9529	1.32076	0.183106	1.00552	0.761322	1083.92	10.032	1099.44	8.86942	1130.28	17.055	1130.28	17.055	95.898
-GBDS-35 Spot 115	313.993	948507	2.90831	12.9191	0.666243	2.00957	1.29092	0.188374	1.10571	0.856528	1112.56	11.2986	1118.75	8.7526	1130.78	13.2662	1130.78	13.2662	98.3892
-GBDS-35 Spot 208	210.252	51942.6	2.13487	12.9061	0.845174	1.97023	1.33157	0.184502	1.02896	0.772742	1091.52	10.3319	1105.39	8.96874	1132.75	16.8074	1132.75	16.8074	96.36
-GBDS-35 Spot 136	539.209	132617	1.9767	12.9058	0.683849	2.08913	1.5026	0.195631	1.33796	0.890435	1151.81	14.1125	1145.24	10.3185	1132.8	13.6149	1132.8	13.6149	101.677
-GBDS-35 Spot 150	769.747	938584	4.54439	12.9019	1.02691	2.09225	1.58428	0.195864	1.20639	0.761479	1153.06	12.7374	1146.26	10.8847	1133.41	20.4423	1133.41	20.4423	101.734
-GBDS-35 Spot 186	100.015	115214	2.44591	12.8874	0.933829	2.01094	1.51303	0.188041	1.19047	0.786812	1110.75	12.1467	1119.21	10.261	1135.68	18.5656	1135.68	18.5656	97.8048
-GBDS-35 Spot 178	143.075	7.88445e+06	3.54483	12.8868	0.838309	1.91313	1.28902	0.178886	0.979184	0.759637	1060.89	9.57828	1085.68	8.59574	1135.78	16.6645	1135.78	16.6645	93.4064
-GBDS-35 Spot 6	29.438	9822.14	1.82791	12.8557	1.05655	2.05607	1.78191	0.191788	1.43489	0.805254	1131.05	14.8854	1134.31	12.1734	1140.58	20.997	1140.58	20.997	99.1646
-GBDS-35 Spot 133	395.168	160573	4.01681	12.8274	0.808937	2.1001	1.40305	0.195464	1.14637	0.817058	1150.91	12.083	1148.84	9.65119	1144.95	16.057	1144.95	16.057	100.52
-GBDS-35 Spot 237	472.658	5.71761e+06	2.3897	12.826	0.689545	2.05054	1.67491	0.19083	1.52639	0.911324	1125.87	15.7682	1132.48	11.4323	1145.15	13.7026	1145.15	13.7026	98.316
-GBDS-35 Spot 314	267.697	73792.8	4.79153	12.8233	0.741306	2.10994	1.40876	0.196316	1.19794	0.850354	1155.5	12.6726	1152.06	9.70506	1145.56	14.7116	1145.56	14.7116	100.867
-GBDS-35 Spot 169	104.004	35995.2	1.01455	12.7828	1.98409	1.93317	2.23296	0.179301	1.02444	0.458783	1063.16	10.0407	1092.64	14.9443	1151.84	39.4053	1151.84	39.4053	92.3006
-GBDS-35 Spot 101	942.743	5.5645e+06	5.57837	12.7743	0.822715	2.10287	1.32764	0.194912	1.04201	0.784854	1147.93	10.957	1149.75	9.13634	1153.15	16.3411	1153.15	16.3411	99.547
-GBDS-35 Spot 295	727.057	1.05168e+06	1.6799	12.7723	0.807283	2.13458	1.66555	0.197819	1.45683	0.874684	1163.59	15.5097	1160.07	11.517	1153.48	16.0372	1153.48	16.0372	100.877
-GBDS-35 Spot 29	201.609	202549	7.00019	12.7605	0.783779	2.0725	1.2818	0.19189	1.01424	0.791268	1131.6	10.5263	1139.76	8.77935	1155.3	15.558	1155.3	15.558	97.9487
-GBDS-35 Spot 137	293.391	96775.9	2.69845	12.7597	0.769995	2.12476	1.58886	0.196715	1.38982	0.874725	1157.65	14.7273	1156.89	10.9705	1155.43	15.2803	1155.43	15.2803	100.192
-GBDS-35 Spot 264	100.347	38879.8	2.23969	12.7527	0.804309	2.12527	1.35937	0.196655	1.09589	0.806175	1157.33	11.6098	1157.05	9.38657	1156.51	15.9632	1156.51	15.9632	100.07
-GBDS-35 Spot 13	295.744	222351	1.43586	12.7406	0.730954	2.0646	1.22782	0.190859	0.986531	0.803483	1126.03	10.1925	1137.14	8.39916	1158.4	14.5078	1158.4	14.5078	97.2054
-GBDS-35 Spot 290	377.612	368796	4.31293	12.7402	0.672426	2.19372	1.77051	0.202789	1.63785	0.925072	1190.28	17.8012	1179.05	12.3491	1158.47	13.3455	1158.47	13.3455	102.746
-GBDS-35 Spot 218	623.783	488098	4.99564	12.7291	0.919516	2.22349	1.5743	0.205362	1.27785	0.811695	1204.06	14.0346	1188.47	11.0266	1160.2	18.252	1160.2	18.252	103.781
-GBDS-35 Spot 88	78.3531	21011	3.3347	12.7162	1.6331	1.8305	2.0237	0.168895	1.19514	0.590571	1006.02	11.1321	1056.46	13.2895	1162.2	32.3737	1162.2	32.3737	86.5617
-GBDS-35 Spot 62	1490.1	139643	8.99887	12.7146	0.699856	1.71337	1.31124	0.158067	1.10886	0.845652	946.024	9.75664	1013.55	8.40747	1162.46	13.8847	1162.46	13.8847	81.3814
-GBDS-35 Spot 216	244.304	57568.3	2.77206	12.6923	0.686697	2.08567	1.43692	0.192076	1.26221	0.878417	1132.61	13.1106	1144.1	9.86216	1165.93	13.624	1165.93	13.624	97.1424
-GBDS-35 Spot 50	137.643	88937.1	2.78628	12.685	0.851993	2.09834	1.25553	0.193133	0.922205	0.734515	1138.32	9.62306	1148.26	8.63405	1167.06	16.8958	1167.06	16.8958	97.5373
-GBDS-35 Spot 3	772.771	927850	2.53474	12.6847	0.841868	2.15464	1.51967	0.198309	1.26518	0.832531	1166.23	13.4972	1166.55	10.5395	1167.12	16.6934	1167.12	16.6934	99.9237
-GBDS-35 Spot 104	387.18	138472	2.94353	12.6782	0.561721	2.18823	1.34947	0.201297	1.227	0.909248	1182.28	13.2541	1177.3	9.40475	1168.17	11.1425	1168.17	11.1425	101.208
-GBDS-35 Spot 58	331.72	100983	1.53589	12.6717	0.671384	1.98787	1.23917	0.182772	1.04152	0.840505	1082.1	10.3752	1111.4	8.37134	1169.19	13.3128	1169.19	13.3128	92.5515
-GBDS-35 Spot 80	308.256	165363	2.95964	12.6678	0.654938	2.05839	1.18927	0.189199	0.992689	0.834701	1117.03	10.1811	1135.09	8.12749	1169.79	12.9866	1169.79	12.9866	95.4898
-GBDS-35 Spot 67	159.348	61657.3	3.05548	12.6472	0.910126	2.08215	1.33718	0.191071	0.979648	0.732625	1127.17	10.1308	1142.94	9.17252	1173.02	18.0241	1173.02	18.0241	96.0917
-GBDS-35 Spot 84	232.117	81234.1	3.09513	12.6452	0.707912	2.07044	1.61771	0.189967	1.4546	0.899169	1121.2	14.9694	1139.08	11.0767	1173.32	14.029	1173.32	14.029	95.5573
-GBDS-35 Spot 182	180.98	108996	2.44574	12.6406	0.669584	2.12625	1.23185	0.195015	1.03397	0.839369	1148.49	10.8774	1157.37	8.50721	1174.06	13.2683	1174.06	13.2683	97.8221
-GBDS-35 Spot 18	1024.78	1.10381e+06	4.87881	12.639	0.725194	1.9858	1.2906	0.182111	1.06759	0.827203	1078.5	10.6024	1110.7	8.71583	1174.3	14.3495	1174.3	14.3495	91.8419
-GBDS-35 Spot 170	239.959	157085	2.05388	12.6207	0.739652	2.16918	1.34104	0.19864	1.11861	0.83414	1168.01	11.9502	1171.22	9.32032	1177.17	14.6492	1177.17	14.6492	99.2221
-GBDS-35 Spot 251	182.514	132597	2.61493	12.6175	0.804536	2.0727	1.36808	0.189756	1.10651	0.808805	1120.05	11.3766	1139.83	9.37065	1177.68	15.9121	1177.68	15.9121	95.1072
-GBDS-35 Spot 90	161.63	120387	2.12764	12.6065	0.842476	2.13887	1.35838	0.195643	1.06557	0.78444	1151.87	11.24	1161.46	9.39887	1179.4	16.6698	1179.4	16.6698	97.6662
-GBDS-35 Spot 221	125.179	139731	2.09349	12.6019	0.840657	2.02857	1.33119	0.185488	1.03216	0.775368	1096.88	10.4108	1125.14	9.05384	1180.11	16.6305	1180.11	16.6305	92.9475
-GBDS-35 Spot 138	290.788	362188	2.20174	12.5562	0.722543	2.22185	1.37132	0.202423	1.16553	0.84993	1188.32	12.6486	1187.95	9.60264	1187.29	14.252	1187.29	14.252	100.087
-GBDS-35 Spot 131	163.031	109720	0.688553	12.5515	0.832914	2.17372	1.42141	0.197964	1.1518	0.810326	1164.38	12.2699	1172.67	9.88546	1188.03	16.449	1188.03	16.449	98.0089
-GBDS-35 Spot 71	1081.19	426557	3.53406	12.5414	0.886136	2.14137	1.61591	0.194861	1.35127	0.836228	1147.65	14.2059	1162.27	11.185	1189.6	17.4844	1189.6	17.4844	96.4741
-GBDS-35 Spot 27	95.9347	371990	4.53571	12.5289	1.12246	2.11904	1.78043	0.192637	1.38204	0.776238	1135.65	14.3903	1155.02	12.2827	1191.57	22.1442	1191.57	22.1442	95.3068
-GBDS-35 Spot 189	80.7484	36106.2	2.4087	12.511	0.881705	2.1086	1.22474	0.191414	0.850044	0.694063	1129.03	8.80381	1151.62	8.43552	1194.41	17.3766	1194.41	17.3766	94.5259
-GBDS-35 Spot 211	400.033	796155	1.16331	12.4972	0.710813	2.22454	1.70429	0.201717	1.54898	0.908873	1184.53	16.7612	1188.8	11.9389	1196.55	14.0022	1196.55	14.0022	98.996
-GBDS-35 Spot 263	512.603	276266	2.17093	12.4741	0.726366	2.37665	1.52152	0.215112	1.33694	0.878688	1255.99	15.2573	1235.6	10.8743	1200.21	14.312	1200.21	14.312	104.648
-GBDS-35 Spot 226	250.845	1.00211e+06	2.87514	12.4541	0.811699	2.12843	1.44838	0.192335	1.19956	0.82821	1134.01	12.4739	1158.08	10.006	1203.37	15.9754	1203.37	15.9754	94.2365
-GBDS-35 Spot 201	83.4407	96445.6	1.14643	12.3865	0.798969	2.23744	1.35638	0.201088	1.09609	0.8081	1181.16	11.8298	1192.85	9.5186	1214.11	15.7194	1214.11	15.7194	97.2866
-GBDS-35 Spot 44	352.114	117332	3.20809	12.3862	0.708058	2.12364	1.50674	0.190857	1.33	0.882704	1126.02	13.741	1156.52	10.4017	1214.14	13.9484	1214.14	13.9484	92.7419
-GBDS-35 Spot 126	216.284	167978	2.84978	12.3806	0.832902	2.27443	1.51314	0.204315	1.26328	0.834872	1198.46	13.8159	1204.39	10.6724	1215.02	16.3966	1215.02	16.3966	98.6368
-GBDS-35 Spot 123	127.579	942793	1.76122	12.2941	0.785361	2.2863	1.19655	0.203947	0.902743	0.754453	1196.49	9.85809	1208.06	8.45274	1228.83	15.4092	1228.83	15.4092	97.3681
-GBDS-35 Spot 217	407.277	830646	0.869619	12.2727	0.718916	2.37903	1.80778	0.21185	1.65868	0.917524	1238.67	18.6923	1236.32	12.9243	1232.24	14.1	1232.24	14.1	100.521
-GBDS-35 Spot 130	28.2226	16191	1.66339	12.1681	1.01046	2.43681	1.37866	0.215145	0.937916	0.680309	1256.17	10.705	1253.53	9.92584	1249	19.781	1249	19.781	100.574
-GBDS-35 Spot 76	1117.96	95696.6	6.59561	12.1073	0.80731	2.05075	1.31687	0.180156	1.04039	0.790044	1067.83	10.2382	1132.55	8.98859	1258.8	15.7633	1258.8	15.7633	84.8293
-GBDS-35 Spot 106	391.819	655363	5.28188	12.0789	0.742066	2.46323	1.49173	0.215884	1.29406	0.86749	1260.09	14.8116	1261.31	10.7736	1263.37	14.4872	1263.37	14.4872	99.7404
-GBDS-35 Spot 14	17.6286	14567.4	1.04369	12.026	2.90259	2.01514	3.1078	0.175839	1.11059	0.357357	1044.2	10.7063	1120.62	21.0933	1271.95	56.6445	1271.95	56.6445	82.0946
-GBDS-35 Spot 172	1560.56	278966	13.2522	12.0225	0.579718	2.02848	1.1966	0.176951	1.04679	0.874806	1050.29	10.1455	1125.11	8.13829	1272.52	11.2923	1272.52	11.2923	82.5366
-GBDS-35 Spot 229	1310.98	303557	5.15316	11.9915	0.560195	2.12048	1.13391	0.184499	0.985864	0.869439	1091.51	9.8991	1155.49	7.824	1277.55	10.9023	1277.55	10.9023	85.4378
-GBDS-35 Spot 74	1722.16	424891	4.75174	11.9339	0.775878	2.0498	1.4148	0.177493	1.18307	0.836215	1053.26	11.4962	1132.23	9.65556	1286.93	15.1071	1286.93	15.1071	81.8429
-GBDS-35 Spot 114	1448.95	458344	5.26764	11.8792	0.770802	2.2789	1.25444	0.196427	0.989693	0.78895	1156.1	10.4745	1205.78	8.85298	1295.86	14.9891	1295.86	14.9891	89.2145
-GBDS-35 Spot 134	175.311	74199.6	2.68973	11.8632	0.851801	2.53581	1.45441	0.218276	1.17887	0.810551	1272.76	13.6159	1282.37	10.5916	1298.5	16.5583	1298.5	16.5583	98.0179
-GBDS-35 Spot 227	92.8135	150536	2.62987	11.7778	0.970944	2.5816	1.76295	0.220619	1.47149	0.834671	1285.14	17.145	1295.43	12.9035	1312.51	18.836	1312.51	18.836	97.9149
-GBDS-35 Spot 175	104.763	70789.3	2.33224	11.7377	0.737712	2.6286	1.35787	0.22387	1.13999	0.839547	1302.29	13.4425	1308.67	9.98819	1319.13	14.2981	1319.13	14.2981	98.7232
-GBDS-35 Spot 192	234.511	123308	2.02295	11.7168	0.857622	2.64956	1.34815	0.225252	1.04019	0.771567	1309.57	12.3275	1314.52	9.93836	1322.59	16.6153	1322.59	16.6153	99.0155
-GBDS-35 Spot 287	183.879	584533	2.59475	11.693	0.793975	2.65521	1.45802	0.225275	1.22287	0.838723	1309.69	14.4937	1316.09	10.7546	1326.52	15.3732	1326.52	15.3732	98.7308
-GBDS-35 Spot 266	223.508	302740	2.56585	11.681	0.863305	2.60114	1.41537	0.22046	1.12159	0.792439	1284.31	13.0605	1300.96	10.381	1328.52	16.7108	1328.52	16.7108	96.6723
-GBDS-35 Spot 127	107.527	121294	3.35566	11.651	0.78807	2.75871	1.33051	0.233214	1.072	0.805711	1351.32	13.0687	1344.44	9.91579	1333.49	15.2433	1333.49	15.2433	101.337
-GBDS-35 Spot 32	177.397	483019	6.03143	11.5618	0.670218	2.63192	1.42801	0.220794	1.26096	0.883019	1286.07	14.7016	1309.6	10.5078	1348.33	12.9367	1348.33	12.9367	95.3825
-GBDS-35 Spot 260	919.757	909434	1.70851	11.5243	0.92516	2.5635	1.49387	0.214357	1.17292	0.785152	1251.99	13.3468	1290.29	10.9123	1354.6	17.8435	1354.6	17.8435	92.4251
-GBDS-35 Spot 24	109.744	115265	2.90348	11.4536	0.766032	2.7439	1.31494	0.228033	1.06877	0.812788	1324.18	12.7935	1340.44	9.78574	1366.46	14.7495	1366.46	14.7495	96.906
-GBDS-35 Spot 5	191.483	215202	1.42177	11.3839	0.772783	2.74454	1.50101	0.226697	1.2868	0.857286	1317.17	15.3298	1340.61	11.1713	1378.21	14.8543	1378.21	14.8543	95.5704
-GBDS-35 Spot 25	528.941	209481	1.19192	11.3579	0.73115	3.0605	1.4203	0.252218	1.21765	0.857319	1449.91	15.8102	1422.86	10.8703	1382.61	14.0455	1382.61	14.0455	104.868
-GBDS-35 Spot 154	112.356	43992.9	2.59776	11.3557	0.747792	2.85147	1.05646	0.234947	0.746273	0.706388	1360.37	9.15246	1369.2	7.94211	1382.97	14.3645	1382.97	14.3645	98.3657
-GBDS-35 Spot 228	1153.07	1.15647e+06	2.7553	11.3358	0.666836	2.47275	1.17477	0.203385	0.967167	0.823283	1193.48	10.5374	1264.1	8.49374	1386.34	12.8035	1386.34	12.8035	86.0886
-GBDS-35 Spot 82	183.491	149618	2.53979	11.3284	0.720773	2.75205	1.23828	0.226211	1.00688	0.813133	1314.61	11.9742	1342.64	9.22247	1387.59	13.8368	1387.59	13.8368	94.7405
-GBDS-35 Spot 176	103.996	28820	1.98545	11.1275	2.77427	2.53808	3.08804	0.204923	1.35624	0.439193	1201.72	14.8693	1283.02	22.4968	1421.86	53.0195	1421.86	53.0195	84.5171
-GBDS-35 Spot 117	79.7042	82222.2	2.84694	11.0093	1.02604	2.93422	1.43272	0.234391	0.999974	0.697953	1357.47	12.2404	1390.78	10.8503	1442.24	19.5515	1442.24	19.5515	94.1223
-GBDS-35 Spot 38	113.549	49180.5	1.75891	10.9442	0.894345	3.0576	1.60933	0.242801	1.33794	0.831366	1401.24	16.8502	1422.14	12.3142	1453.54	17.0161	1453.54	17.0161	96.4022
-GBDS-35 Spot 283	171.478	103394	2.52813	10.9254	0.708909	3.22467	1.00501	0.25563	0.712387	0.708835	1467.44	9.34941	1463.11	7.78936	1456.8	13.4819	1456.8	13.4819	100.731
-GBDS-35 Spot 124	262.753	114181	3.75067	10.9224	0.545302	3.30669	1.16046	0.26206	1.02436	0.882719	1500.37	13.7117	1482.63	9.04736	1457.32	10.3696	1457.32	10.3696	102.954
-GBDS-35 Spot 273	290.052	1.17752e+07	5.44691	10.8958	0.678354	3.2937	1.63032	0.260394	1.48249	0.909325	1491.86	19.7441	1479.56	12.6992	1461.96	12.8918	1461.96	12.8918	102.045
-GBDS-35 Spot 87	183.426	129677	8.60933	10.8805	0.881968	3.09098	1.51	0.244024	1.22565	0.811692	1407.58	15.4985	1430.46	11.5849	1464.63	16.7555	1464.63	16.7555	96.1047
-GBDS-35 Spot 225	340.169	230991	2.32471	10.8591	0.696351	3.2035	1.26166	0.25241	1.05208	0.833888	1450.89	13.6687	1458.01	9.76334	1468.38	13.2224	1468.38	13.2224	98.8093
-GBDS-35 Spot 179	151.672	118961	2.25962	10.8355	0.744376	3.25086	1.0846	0.255585	0.788829	0.727303	1467.21	10.3512	1469.38	8.42227	1472.5	14.1265	1472.5	14.1265	99.6406
-GBDS-35 Spot 142	90.4364	88001.6	1.96733	10.8282	0.97078	3.39062	1.58514	0.266392	1.2531	0.790529	1522.46	16.9925	1502.23	12.4301	1473.78	18.4202	1473.78	18.4202	103.303
-GBDS-35 Spot 75	130.587	220825	2.40315	10.8018	0.772124	3.16819	1.55239	0.24831	1.34675	0.867533	1429.75	17.2694	1449.44	11.9816	1478.41	14.6415	1478.41	14.6415	96.7085
-GBDS-35 Spot 187	105.131	113585	1.95514	10.7927	0.763276	3.28176	1.36151	0.256994	1.12744	0.82808	1474.45	14.8594	1476.74	10.5962	1480.01	14.4707	1480.01	14.4707	99.6239
-GBDS-35 Spot 139	67.5858	100549	0.792261	10.6907	0.69785	3.40357	1.76795	0.264015	1.62439	0.9188	1510.35	21.8719	1505.22	13.8757	1497.99	13.1985	1497.99	13.1985	100.825
-GBDS-35 Spot 96	126.745	197326	0.647327	10.6243	1.01373	3.32621	1.66561	0.256412	1.32159	0.79346	1471.46	17.3869	1487.22	13.0037	1509.76	19.1413	1509.76	19.1413	97.4635
-GBDS-35 Spot 291	127.897	5.99379e+06	1.19306	10.5494	0.785913	3.41219	1.70161	0.261185	1.50924	0.886951	1495.9	20.1488	1507.21	13.3627	1523.11	14.813	1523.11	14.813	98.2136
-GBDS-35 Spot 70	63.6714	37737.1	2.10154	10.4679	0.863106	3.50557	1.42704	0.266259	1.13644	0.796359	1521.79	15.4044	1528.47	11.2744	1537.72	16.2383	1537.72	16.2383	98.9639
-GBDS-35 Spot 77	220.115	145957	2.736	10.3552	0.729669	3.66421	1.45605	0.275313	1.26002	0.865372	1567.71	17.5351	1563.61	11.6152	1558.05	13.691	1558.05	13.691	100.62
-GBDS-35 Spot 116	268.08	200616	1.01748	10.0183	0.791992	3.93796	1.58806	0.286254	1.37647	0.866765	1622.78	19.7475	1621.52	12.8601	1619.86	14.7397	1619.86	14.7397	100.181
-GBDS-35 Spot 162	44.0414	59919.3	3.73068	9.9408	0.871945	4.03258	1.32105	0.290866	0.99241	0.75123	1645.85	14.4152	1640.79	10.7487	1634.29	16.1977	1634.29	16.1977	100.707
-GBDS-35 Spot 68	710.189	425939	2.0105	9.59951	0.925124	3.93559	1.36414	0.274124	1.0025	0.734899	1561.7	13.904	1621.03	11.0452	1698.93	17.0446	1698.93	17.0446	91.9228
-GBDS-35 Spot 48	640.725	2.94648e+06	2.03903	9.46313	1.0821	4.01019	1.85855	0.275352	1.51105	0.813026	1567.91	21.0308	1636.26	15.1059	1725.24	19.8712	1725.24	19.8712	90.8805
-GBDS-35 Spot 105	267.574	318910	5.97882	9.10148	0.631002	4.99705	1.46266	0.33	1.31955	0.902157	1838.38	21.1061	1818.82	12.3757	1796.48	11.4862	1796.48	11.4862	102.332
-GBDS-35 Spot 261	416.365	6.73508e+06	5.77023	9.10089	0.721812	5.04496	1.73669	0.333142	1.57959	0.909536	1853.59	25.4458	1826.9	14.718	1796.6	13.1391	1796.6	13.1391	103.172
-GBDS-35 Spot 203	203.444	96212.2	0.532761	8.91155	0.828925	5.14021	1.41766	0.33237	1.15006	0.81124	1849.86	18.4943	1842.78	12.0509	1834.77	15.0186	1834.77	15.0186	100.822
-GBDS-35 Spot 305	764.119	488926	3.84347	8.90431	0.576522	4.5837	1.23633	0.296145	1.09367	0.884617	1672.16	16.1086	1746.31	10.3056	1836.25	10.4436	1836.25	10.4436	91.0642
-GBDS-35 Spot 15	112.967	160995	0.618497	8.84039	0.853077	5.0328	1.58877	0.322826	1.34032	0.84362	1803.52	21.086	1824.86	13.4588	1849.29	15.4271	1849.29	15.4271	97.5251
-GBDS-35 Spot 125	510.681	255844	6.78819	8.33669	0.992851	5.52756	2.03996	0.334361	1.78204	0.873568	1859.48	28.786	1904.89	17.5419	1954.71	17.7308	1954.71	17.7308	95.1284
-GBDS-35 Spot 152	73.986	3.64518e+06	1.03743	8.20624	0.757218	5.95544	1.17584	0.354606	0.899564	0.765041	1956.55	15.1804	1969.36	10.2231	1982.82	13.4797	1982.82	13.4797	98.6752
-GBDS-35 Spot 19	183.549	185493	1.82601	7.79628	0.629202	6.31045	1.33283	0.356973	1.17497	0.881557	1967.81	19.9255	2019.91	11.6826	2073.57	11.0824	2073.57	11.0824	94.8998
-GBDS-35 Spot 262	52.3307	180164	1.23641	7.7139	0.779483	6.80916	1.34149	0.381114	1.09179	0.813862	2081.49	19.4215	2086.91	11.8775	2092.26	13.7031	2092.26	13.7031	99.4853
-GBDS-35 Spot 165	32.5537	44145.2	1.39693	7.61146	0.765542	7.29617	1.46352	0.40295	1.24733	0.852281	2182.61	23.0946	2148.34	13.0698	2115.72	13.4204	2115.72	13.4204	103.161
-GBDS-35 Spot 41	635.065	88464.7	15.2397	7.44781	0.656912	6.59237	1.20884	0.356252	1.01477	0.839457	1964.39	17.1831	2058.33	10.658	2153.75	11.467	2153.75	11.467	91.2078
-GBDS-35 Spot 306	201.277	226022	1.40768	5.8105	0.832268	11.1561	1.48146	0.470342	1.22558	0.827281	2485.06	25.2731	2536.26	13.8059	2577.45	13.9053	2577.45	13.9053	96.4154
-GBDS-35 Spot 242	113.113	81778.7	2.39719	5.36168	0.559841	13.8598	1.22359	0.539194	1.088	0.889189	2780.08	24.5698	2740.17	11.5885	2710.88	9.23551	2710.88	9.23551	102.552
-GBDS-35 Spot 235	267.242	247904	3.10693	5.06302	0.787075	12.0424	1.63559	0.442397	1.43375	0.8766	2361.36	28.348	2607.72	15.3353	2805.01	12.8725	2805.01	12.8725	84.1836
-GBDS-35 Spot 267	71.968	84183.7	0.998375	4.9546	0.854228	13.9646	1.80405	0.502024	1.58899	0.880791	2622.49	34.2366	2747.31	17.0955	2840.35	13.923	2840.35	13.923	92.3298

## Sheet: Cecil Pate
Table _____. U-Pb geochronologic analyses.
							Isotope ratios						Apparent ages (Ma)
Analysis	U	206Pb	U/Th	206Pb*	±	207Pb*	±	206Pb*	±	error	206Pb*	±	207Pb*	±	206Pb*	±	Best age	±	Conc
	(ppm)	204Pb		207Pb*	(%)	235U*	(%)	238U	(%)	corr.	238U*	(Ma)	235U	(Ma)	207Pb*	(Ma)	(Ma)	(Ma)	(%)
GBDS-18-Spot 303	2731.1	37034.6	3.5784	16.8062	0.713382	0.257187	1.64061	0.0313622	1.4774	0.900514	199.068	2.89608	232.398	3.4079	584.583	15.4651	199.068	2.89608	NA
GBDS-18-Spot 37	2255.27	14735.3	3.28466	14.7541	2.61781	0.346808	2.98296	0.037127	1.43007	0.479414	235	3.30015	302.317	7.79955	860.84	54.3512	235	3.30015	NA
GBDS-18-Spot 161	477.4	64456.4	2.2679	19.3719	0.838327	0.293403	1.25315	0.0412406	0.931445	0.743283	260.518	2.3782	261.235	2.88645	267.643	19.235	260.518	2.3782	NA
GBDS-18-Spot 22	2712.12	235771	2.4944	19.1938	0.806205	0.296147	1.37937	0.0412436	1.11924	0.811412	260.537	2.85788	263.386	3.20011	288.798	18.4369	260.537	2.85788	NA
GBDS-18-Spot 120	1192.51	1.10415e+06	2.47304	19.1165	0.731391	0.30496	1.19067	0.0422998	0.939549	0.789096	267.072	2.45801	270.267	2.82531	298.011	16.6788	267.072	2.45801	NA
GBDS-18-Spot 279	1386.12	403906	2.14961	19.0737	0.727574	0.307402	1.17616	0.0425432	0.924112	0.785704	268.578	2.43097	272.165	2.80798	303.127	16.6045	268.578	2.43097	NA
GBDS-18-Spot 258	259.76	190089	1.69834	19.4922	0.706133	0.301014	1.40176	0.0425731	1.21091	0.863852	268.763	3.18758	267.192	3.29314	253.46	16.2254	268.763	3.18758	NA
GBDS-18-Spot 150	1567.26	376129	2.17431	19.4986	0.69558	0.306681	1.10806	0.043389	0.862534	0.778419	273.805	2.31221	271.605	2.64066	252.711	15.9929	273.805	2.31221	NA
GBDS-18-Spot 88	967.04	283450	8.64022	19.2333	0.732519	0.311648	1.00217	0.0434915	0.683925	0.682447	274.439	1.83757	275.457	2.41778	284.104	16.776	274.439	1.83757	NA
GBDS-18-Spot 162	205.971	50701.9	1.40891	19.6782	0.872051	0.304878	1.33403	0.043531	1.00954	0.756757	274.683	2.71478	270.203	3.16486	231.542	20.1575	274.683	2.71478	NA
GBDS-18-Spot 200	1069.82	31337.9	1.34435	17.3101	0.855966	0.346797	1.34298	0.0435575	1.03485	0.770563	274.846	2.78447	302.309	3.51135	520.06	18.7737	274.846	2.78447	NA
GBDS-18-Spot 52	98.9381	50443.1	0.917317	19.1719	1.1149	0.339022	1.51912	0.0471608	1.03185	0.679242	297.067	2.99572	296.43	3.90537	291.439	25.4508	297.067	2.99572	NA
GBDS-18-Spot 166	1631.02	127283	39.9055	18.3637	0.709615	0.354795	1.22362	0.0472745	0.996844	0.814667	297.767	2.90076	308.322	3.25374	388.921	15.9313	297.767	2.90076	NA
GBDS-18-Spot 255	486.869	102227	0.936753	19.1102	0.53691	0.343446	1.11357	0.0476224	0.975581	0.876087	299.908	2.85883	299.78	2.89058	298.759	12.2375	299.908	2.85883	NA
GBDS-18-Spot 209	770.492	1.12418e+06	65.12	18.8676	0.859807	0.348731	1.56492	0.0477412	1.30756	0.835543	300.639	3.84078	303.766	4.10856	327.875	19.4898	300.639	3.84078	NA
GBDS-18-Spot 81	458.967	43712.2	1.7165	19.2695	0.781348	0.344717	1.30838	0.0481969	1.04945	0.802102	303.442	3.1107	300.739	3.40563	279.838	17.884	303.442	3.1107	NA
GBDS-18-Spot 39	764.872	209799	4.17974	18.658	0.763153	0.357914	1.27714	0.0484542	1.02405	0.801833	305.024	3.05087	310.656	3.41804	353.148	17.2268	305.024	3.05087	NA
GBDS-18-Spot 7	407.23	1.08534e+06	1.19377	19.3128	0.737709	0.34646	1.75447	0.0485498	1.59184	0.907305	305.612	4.75135	302.055	4.58395	274.644	16.9014	305.612	4.75135	NA
GBDS-18-Spot 82	435.685	91254.8	1.05775	18.8463	1.02886	0.355185	1.99265	0.0485701	1.70649	0.856393	305.737	5.09559	308.614	5.303	330.429	23.3276	305.737	5.09559	NA
GBDS-18-Spot 195	277.517	67698	0.833504	18.5976	0.849032	0.360115	1.49335	0.0485942	1.22851	0.822653	305.885	3.67006	312.301	4.01475	360.446	19.1514	305.885	3.67006	NA
GBDS-18-Spot 183	266.602	59400.1	5.80227	19.1076	0.951631	0.351006	1.44373	0.0486642	1.08571	0.752014	306.316	3.24791	305.478	3.8087	299.064	21.7066	306.316	3.24791	NA
GBDS-18-Spot 12	433.877	92083.4	0.981935	18.8725	0.977953	0.357041	1.75483	0.0488917	1.45706	0.830316	307.714	4.37826	310.003	4.68806	327.256	22.2012	307.714	4.37826	NA
GBDS-18-Spot 13	2497.57	111754	7.75898	17.6731	0.636466	0.381745	1.24081	0.0489523	1.06514	0.858423	308.086	3.20438	328.321	3.48084	474.344	14.0962	308.086	3.20438	NA
GBDS-18-Spot 29	103.895	28778.4	1.74436	19.5512	1.43518	0.34547	1.63821	0.0490084	0.78993	0.482192	308.431	2.37902	301.308	4.27108	246.516	33.0491	308.431	2.37902	NA
GBDS-18-Spot 201	603.25	88924.4	1.62053	19.0016	0.707803	0.355483	1.21179	0.0490114	0.983594	0.811685	308.45	2.96245	308.837	3.22689	311.741	16.126	308.45	2.96245	NA
GBDS-18-Spot 160	339.231	67804	0.542391	18.279	1.00481	0.369857	1.66793	0.049054	1.3313	0.798175	308.711	4.01302	319.548	4.57267	399.296	22.5164	308.711	4.01302	NA
GBDS-18-Spot 111	227.179	97238.7	1.26589	19.0138	0.964929	0.355681	1.54244	0.0490701	1.20334	0.780155	308.81	3.62844	308.985	4.10907	310.309	21.9774	308.81	3.62844	NA
GBDS-18-Spot 71	489.905	97377.2	0.83533	18.9691	0.603609	0.357325	1.39424	0.0491812	1.25681	0.901427	309.493	3.79783	310.216	3.72691	315.634	13.7152	309.493	3.79783	NA
GBDS-18-Spot 6	295.72	76907.1	1.12507	19.1504	0.838107	0.354859	1.24506	0.0493086	0.920739	0.739511	310.275	2.78916	308.369	3.3112	293.989	19.1472	310.275	2.78916	NA
GBDS-18-Spot 78	166.474	6408.05	1.68216	14.0955	4.48029	0.482611	4.64659	0.0493587	1.23198	0.265137	310.583	3.73562	399.862	15.3591	954.917	91.6615	310.583	3.73562	NA
GBDS-18-Spot 48	315.088	46829.9	0.614461	18.7586	0.869189	0.363224	1.44116	0.0494381	1.14954	0.797651	311.071	3.49098	314.619	3.89898	340.993	19.6575	311.071	3.49098	NA
GBDS-18-Spot 292	443.809	68548.5	2.49039	18.8125	0.909859	0.362802	2.4575	0.0495226	2.28286	0.928937	311.59	6.94399	314.305	6.64303	334.506	20.6271	311.59	6.94399	NA
GBDS-18-Spot 35	279.833	49698.1	0.678126	19.2439	0.988433	0.354696	1.58002	0.0495264	1.23267	0.780158	311.613	3.74979	308.247	4.20058	282.876	22.5991	311.613	3.74979	NA
GBDS-18-Spot 175	1647.02	695367	1.78858	18.7146	0.741008	0.365627	1.12725	0.0496485	0.849465	0.753576	312.363	2.59015	316.407	3.06448	346.289	16.7614	312.363	2.59015	NA
GBDS-18-Spot 301	116.826	117108	1.45909	18.1482	1.78005	0.377714	1.91673	0.0497376	0.710834	0.370857	312.911	2.17115	325.354	5.3358	415.361	39.7913	312.911	2.17115	NA
GBDS-18-Spot 242	314.606	224629	0.864493	18.9639	0.847937	0.362093	1.25149	0.0498236	0.920457	0.735486	313.439	2.81605	313.776	3.37811	316.262	19.27	313.439	2.81605	NA
GBDS-18-Spot 168	298.284	199182	5.96703	19.19	0.915234	0.358262	1.27165	0.0498842	0.882855	0.694261	313.811	2.70414	310.916	3.40577	289.254	20.9362	313.811	2.70414	NA
GBDS-18-Spot 204	185.56	43426.5	0.746565	19.2999	1.05944	0.356646	1.38743	0.0499436	0.895854	0.645692	314.175	2.74707	309.708	3.70352	276.228	24.2665	314.175	2.74707	NA
GBDS-18-Spot 119	597.254	140922	0.647259	18.4797	0.914819	0.375174	1.47007	0.0503055	1.15075	0.782783	316.397	3.55303	323.481	4.07236	374.769	20.5676	316.397	3.55303	NA
GBDS-18-Spot 179	1035.12	170569	1.76797	18.5832	0.907942	0.373465	1.53873	0.0503568	1.24231	0.80736	316.712	3.83944	322.218	4.24841	362.19	20.4665	316.712	3.83944	NA
GBDS-18-Spot 193	344.914	82110.2	1.65003	18.8219	1.14788	0.368869	2.19704	0.0503759	1.87333	0.85266	316.829	5.79176	318.815	6.0115	333.346	26.0248	316.829	5.79176	NA
GBDS-18-Spot 263	923.155	786312	0.98885	19.2116	0.700778	0.362868	1.0328	0.0505826	0.758674	0.73458	318.097	2.35475	314.354	2.79217	286.669	16.0201	318.097	2.35475	NA
GBDS-18-Spot 237	251.617	40124.9	3.23918	19.2352	0.748896	0.362643	1.25316	0.0506131	1.00477	0.801788	318.285	3.12035	314.186	3.38636	283.879	17.1349	318.285	3.12035	NA
GBDS-18-Spot 94	423.903	14228	0.864767	15.7141	1.44149	0.444228	1.92808	0.0506505	1.28048	0.664119	318.514	3.97938	373.23	6.02186	728.689	30.548	318.514	3.97938	NA
GBDS-18-Spot 163	246.688	58785.8	0.404816	18.2987	1.08098	0.38149	1.45187	0.0506513	0.969231	0.667574	318.519	3.01216	328.134	4.07095	396.884	24.2342	318.519	3.01216	NA
GBDS-18-Spot 155	303.432	67265.4	1.4284	17.9866	1.29228	0.388486	1.68165	0.0507005	1.07608	0.639895	318.821	3.3473	333.263	4.77751	435.317	28.7855	318.821	3.3473	NA
GBDS-18-Spot 262	482.145	56334.5	0.853883	18.5805	0.823532	0.37614	1.26045	0.0507102	0.954211	0.757042	318.88	2.96876	324.194	3.49818	362.511	18.5749	318.88	2.96876	NA
GBDS-18-Spot 299	765.069	489262	11.0651	18.9648	0.889112	0.36942	1.33056	0.0508342	0.989882	0.74396	319.641	3.08691	319.223	3.6446	316.153	20.2225	319.641	3.08691	NA
GBDS-18-Spot 122	613.113	381676	0.575148	18.5949	1.04513	0.378028	1.52322	0.0510041	1.1081	0.727474	320.683	3.46656	325.586	4.24288	360.768	23.5799	320.683	3.46656	NA
GBDS-18-Spot 174	841.311	224611	6.82367	18.7173	0.792757	0.376153	1.10112	0.0510853	0.7642	0.694021	321.181	2.39433	324.204	3.05608	345.961	17.9155	321.181	2.39433	NA
GBDS-18-Spot 90	503.891	88663.6	1.54997	19.045	0.51068	0.371638	1.06166	0.0513556	0.930772	0.87671	322.839	2.93089	320.866	2.92078	306.578	11.6183	322.839	2.93089	NA
GBDS-18-Spot 142	473.566	195029	1.83942	18.8222	0.756174	0.377514	1.08137	0.0515575	0.773022	0.714854	324.077	2.44326	325.207	3.00914	333.298	17.166	324.077	2.44326	NA
GBDS-18-Spot 252	167.631	44310.5	0.583827	19.3107	1.11497	0.369771	1.58539	0.0518105	1.12708	0.710916	325.628	3.57894	319.484	4.34565	274.899	25.5615	325.628	3.57894	NA
GBDS-18-Spot 107	1106.68	453752	26.9325	18.7514	0.851687	0.38108	1.47865	0.0518487	1.20874	0.817458	325.862	3.84092	327.832	4.14282	341.827	19.2579	325.862	3.84092	NA
GBDS-18-Spot 222	675.021	53673.9	15.8764	18.0243	1.12665	0.396518	1.62932	0.0518571	1.17701	0.722393	325.913	3.74068	339.12	4.69739	430.658	25.1262	325.913	3.74068	NA
GBDS-18-Spot 293	205.225	113240	0.946283	18.9149	1.08361	0.378343	1.76252	0.0519251	1.39006	0.788678	326.33	4.42328	325.818	4.91243	322.188	24.6271	326.33	4.42328	NA
GBDS-18-Spot 125	191.932	13348.9	0.54904	14.2079	5.2251	0.504682	5.36576	0.0520277	1.22054	0.227468	326.959	3.89115	414.867	18.276	938.689	107.195	326.959	3.89115	NA
GBDS-18-Spot 178	222.009	19522.4	0.974009	15.943	2.30022	0.451252	3.29963	0.0522006	2.36571	0.716962	328.018	7.56584	378.155	10.4181	697.96	48.9975	328.018	7.56584	NA
GBDS-18-Spot 261	93.3975	37957.2	1.06375	19.4999	0.997639	0.370498	1.27686	0.0524211	0.796922	0.624127	329.369	2.55888	320.022	3.50495	252.559	22.9483	329.369	2.55888	NA
GBDS-18-Spot 100	843.959	124348	0.924796	18.8644	0.73472	0.383508	1.28736	0.0524936	1.05711	0.821147	329.813	3.39881	329.616	3.62348	328.236	16.6828	329.813	3.39881	NA
GBDS-18-Spot 249	280.593	15276.7	1.57579	16.9329	1.85196	0.430559	2.12621	0.0528995	1.04451	0.491254	332.298	3.38294	363.573	6.49783	568.26	40.294	332.298	3.38294	NA
GBDS-18-Spot 75	465.35	134284	1.37428	19.0576	0.638639	0.384885	1.1068	0.0532213	0.903961	0.816734	334.269	2.94465	330.626	3.12333	305.08	14.5737	334.269	2.94465	NA
GBDS-18-Spot 281	373.129	35928.6	1.21803	17.2048	0.83445	0.426524	1.60089	0.0532451	1.36621	0.853408	334.414	4.45231	360.705	4.86024	533.463	18.2739	334.414	4.45231	NA
GBDS-18-Spot 169	349.387	150872	1.01033	18.9611	0.716232	0.387703	1.49061	0.0533397	1.30726	0.876998	334.993	4.26741	332.69	4.22863	316.592	16.2696	334.993	4.26741	NA
GBDS-18-Spot 60	856.47	442793	1.12053	18.3429	0.973474	0.404234	1.43071	0.0538007	1.04846	0.732827	337.814	3.45065	344.714	4.18193	391.472	21.8444	337.814	3.45065	NA
GBDS-18-Spot 253	621.476	116006	95.6209	18.2763	0.984943	0.415659	1.50532	0.0551204	1.13837	0.756229	345.881	3.83364	352.942	4.48787	399.631	22.0703	345.881	3.83364	NA
GBDS-18-Spot 308	413.846	622961	7.46392	18.3823	0.876717	0.419451	1.47284	0.055946	1.18347	0.803535	350.924	4.04208	355.658	4.41924	386.65	19.6903	350.924	4.04208	NA
GBDS-18-Spot 24	453.784	191378	1.46668	18.3047	0.821146	0.422466	1.38673	0.0561102	1.11747	0.805831	351.926	3.82724	357.813	4.1819	396.15	18.4111	351.926	3.82724	NA
GBDS-18-Spot 134	1351.09	278240	0.266681	18.2348	0.80161	0.42466	1.90252	0.0561864	1.7254	0.906902	352.391	5.91696	359.378	5.7583	404.713	17.9468	352.391	5.91696	NA
GBDS-18-Spot 182	1087.18	575154	3.82414	18.5091	0.920341	0.419207	1.53514	0.056299	1.22867	0.800363	353.078	4.2215	355.484	4.6043	371.198	20.7103	353.078	4.2215	NA
GBDS-18-Spot 167	1100.05	859561	13.8582	18.7223	0.494789	0.417913	0.868539	0.0567717	0.713823	0.821866	355.962	2.47206	354.557	2.5993	345.374	11.1717	355.962	2.47206	NA
GBDS-18-Spot 108	476.568	262080	71.647	17.5187	0.849329	0.451241	2.41864	0.0573585	2.26461	0.936316	359.541	7.91931	378.148	7.63621	493.758	18.7033	359.541	7.91931	NA
GBDS-18-Spot 173	194.611	102638	1.5246	18.904	0.715552	0.421937	1.42209	0.0578748	1.22896	0.864189	362.688	4.33421	357.435	4.28478	323.464	16.2539	362.688	4.33421	NA
GBDS-18-Spot 4	258.347	202675	0.747344	18.6631	0.655255	0.427573	1.17085	0.0579004	0.970323	0.828735	362.844	3.42351	361.452	3.56077	352.547	14.8054	362.844	3.42351	NA
GBDS-18-Spot 141	219.602	2.73407e+06	8.60817	18.5331	1.13159	0.431353	1.51591	0.0580055	1.00871	0.665414	363.484	3.56504	364.137	4.63866	368.271	25.4754	363.484	3.56504	NA
GBDS-18-Spot 153	660.836	124317	1.02818	18.2265	0.781559	0.442321	1.19586	0.0584963	0.905128	0.756882	366.474	3.22454	371.888	3.72383	405.741	17.4943	366.474	3.22454	NA
GBDS-18-Spot 30	152.159	30939.6	1.29449	18.921	1.12735	0.426348	1.50667	0.0585323	0.99956	0.663424	366.694	3.56303	360.58	4.57287	321.454	25.6158	366.694	3.56303	NA
GBDS-18-Spot 79	97.9506	75552.7	1.00086	18.9916	0.960774	0.424955	1.40456	0.0585589	1.02455	0.729447	366.855	3.65368	359.588	4.2532	312.943	21.8423	366.855	3.65368	NA
GBDS-18-Spot 185	590.506	167106	162.072	18.6801	0.616566	0.432811	1.25233	0.058663	1.09003	0.870405	367.49	3.89372	365.171	3.84114	350.492	13.9262	367.49	3.89372	NA
GBDS-18-Spot 45	676.143	152280	11.2832	18.2251	0.620533	0.44482	1.20276	0.0588223	1.03032	0.856633	368.459	3.68986	373.645	3.75993	405.908	13.8891	368.459	3.68986	NA
GBDS-18-Spot 259	143.615	25139.8	1.55421	18.1524	1.81148	0.450724	2.21504	0.0593654	1.27474	0.575491	371.765	4.60497	377.786	6.98786	414.843	40.4948	371.765	4.60497	NA
GBDS-18-Spot 278	1112.77	28800.5	1.85298	15.4574	1.04755	0.530713	5.98628	0.0595229	5.89391	0.98457	372.723	21.345	432.283	21.0773	763.462	22.0794	372.723	21.345	NA
GBDS-18-Spot 227	944.226	185912	36.7457	15.9803	2.02439	0.514079	2.22506	0.0596078	0.923438	0.415017	373.24	3.34876	421.188	7.67116	692.979	43.1532	373.24	3.34876	NA
GBDS-18-Spot 1	2272.68	883462	2.64729	18.3447	0.692301	0.451789	1.22517	0.060136	1.01082	0.825047	376.453	3.6963	378.531	3.87134	391.245	15.5357	376.453	3.6963	NA
GBDS-18-Spot 65	76.9376	12387.2	1.39229	18.7292	1.38665	0.44851	1.85168	0.0609507	1.22716	0.662727	381.405	4.54467	376.235	5.82172	344.524	31.376	381.405	4.54467	NA
GBDS-18-Spot 180	1565.75	183013	2.5409	17.8264	0.651799	0.471488	1.04004	0.0609848	0.810456	0.779256	381.612	3.00303	392.216	3.38372	455.249	14.4651	381.612	3.00303	NA
GBDS-18-Spot 288	197.635	346539	30.0784	18.663	0.806335	0.450383	1.29617	0.060989	1.01483	0.782946	381.637	3.76056	377.548	4.0869	352.559	18.2016	381.637	3.76056	NA
GBDS-18-Spot 232	2731.1	26850.7	1.25176	16.4241	1.30297	0.512835	1.59682	0.0611149	0.923094	0.578082	382.402	3.42727	420.354	5.49638	634.299	28.05	382.402	3.42727	NA
GBDS-18-Spot 158	1445.17	657277	6.7982	18.238	0.614924	0.464635	1.20927	0.061486	1.04125	0.861056	384.656	3.88807	387.476	3.89526	404.328	13.768	384.656	3.88807	NA
GBDS-18-Spot 172	305.581	98290.7	1.46253	18.4957	0.844943	0.458997	1.48591	0.0615982	1.22229	0.822588	385.337	4.57192	383.56	4.74657	372.827	19.0116	385.337	4.57192	NA
GBDS-18-Spot 41	364	112424	0.926737	18.3919	0.593135	0.462168	1.05033	0.0616756	0.866825	0.825288	385.808	3.24617	385.765	3.37101	385.487	13.3232	385.808	3.24617	NA
GBDS-18-Spot 62	194.631	167933	1.10552	18.593	0.93431	0.457509	1.58609	0.0617216	1.28169	0.808085	386.087	4.80318	382.524	5.05533	361.001	21.0567	386.087	4.80318	NA
GBDS-18-Spot 133	45.3404	9437.32	0.977753	18.8906	1.91986	0.450726	2.2904	0.0617799	1.24904	0.545336	386.441	4.68497	377.788	7.22565	325.07	43.571	386.441	4.68497	NA
GBDS-18-Spot 300	372.951	148116	0.810653	18.3468	0.921383	0.464345	1.49112	0.0618142	1.17238	0.786246	386.649	4.39975	387.275	4.80112	390.998	20.6779	386.649	4.39975	NA
GBDS-18-Spot 203	118.75	246964	0.898716	18.7876	1.03784	0.453899	1.75558	0.0618754	1.41596	0.806549	387.021	5.3188	380.006	5.56518	337.462	23.501	387.021	5.3188	NA
GBDS-18-Spot 265	1372.21	889327	1.41622	18.2885	0.587933	0.466817	1.03182	0.0619459	0.847926	0.821781	387.449	3.1885	388.988	3.33429	398.128	13.1781	387.449	3.1885	NA
GBDS-18-Spot 198	1038	358266	3.76579	18.1789	0.726473	0.470086	1.5719	0.0620058	1.39395	0.886795	387.813	5.24653	391.249	5.10379	411.59	16.2442	387.813	5.24653	NA
GBDS-18-Spot 21	688.71	271254	11.7154	18.2389	0.734707	0.468673	1.2717	0.0620237	1.038	0.816225	387.921	3.90784	390.272	4.12062	404.209	16.4501	387.921	3.90784	NA
GBDS-18-Spot 275	237.386	31505	0.82631	18.6588	1.04729	0.459298	1.81304	0.0621823	1.47997	0.816292	388.884	5.58522	383.769	5.7942	353.027	23.6611	388.884	5.58522	NA
GBDS-18-Spot 208	2157.03	125192	1.1622	17.7349	0.692368	0.484525	1.29649	0.0623495	1.09613	0.845463	389.898	4.14712	401.173	4.29665	466.615	15.3561	389.898	4.14712	NA
GBDS-18-Spot 11	179.012	212250	2.28223	18.4766	0.917397	0.465286	1.27638	0.0623776	0.887425	0.695268	390.069	3.35892	387.927	4.11537	375.156	20.6438	390.069	3.35892	NA
GBDS-18-Spot 302	711.243	564988	3.61242	18.2798	0.83824	0.470572	1.1733	0.0624144	0.820962	0.699705	390.292	3.10908	391.584	3.81223	399.2	18.7842	390.292	3.10908	NA
GBDS-18-Spot 130	738.9	1.25191e+07	5.77167	17.8982	0.721381	0.484246	1.29396	0.0628873	1.07422	0.830178	393.161	4.09718	400.982	4.2866	446.279	16.0549	393.161	4.09718	NA
GBDS-18-Spot 286	255.359	250507	1.526	18.3595	0.855678	0.473567	1.33407	0.0630857	1.0235	0.767202	394.364	3.91533	393.65	4.35333	389.435	19.2081	394.364	3.91533	NA
GBDS-18-Spot 192	1731.12	137484	21.3842	17.903	0.989332	0.486711	1.3028	0.0632245	0.847649	0.650637	395.205	3.24934	402.667	4.33067	445.683	21.9912	395.205	3.24934	NA
GBDS-18-Spot 217	102.473	64282.2	0.892	18.6479	0.963063	0.468248	1.49677	0.063357	1.14579	0.765507	396.009	4.40086	389.978	4.84691	354.372	21.743	396.009	4.40086	NA
GBDS-18-Spot 10	811.742	48610.4	1.50799	16.8468	0.936955	0.519067	1.37637	0.0634496	1.00823	0.732524	396.57	3.87783	424.528	4.77547	579.342	20.3368	396.57	3.87783	NA
GBDS-18-Spot 106	295.718	71310.4	1.79087	18.4877	0.758893	0.474333	1.32851	0.0636288	1.09042	0.820786	397.657	4.20511	394.178	4.33996	373.8	17.0821	397.657	4.20511	NA
GBDS-18-Spot 282	495.786	150582	9.29949	18.2507	0.841408	0.484392	1.43586	0.0641451	1.16349	0.810313	400.785	4.5211	401.082	4.75765	402.769	18.8434	400.785	4.5211	99.5073
GBDS-18-Spot 56	383.107	96777.7	3.11848	18.3512	0.730726	0.48372	1.31389	0.0644091	1.09195	0.831079	402.384	4.2595	400.622	4.34944	390.449	16.4003	402.384	4.2595	103.057
GBDS-18-Spot 73	325.655	119438	2.05001	18.3209	0.783072	0.485467	1.28733	0.0645348	1.02177	0.793712	403.145	3.99304	401.817	4.27187	394.163	17.5634	403.145	3.99304	102.279
GBDS-18-Spot 307	595.008	406815	2.62871	18.1086	0.623622	0.492912	1.25144	0.0647654	1.08499	0.866992	404.542	4.25435	406.893	4.19545	420.24	13.9239	404.542	4.25435	96.2644
GBDS-18-Spot 18	236.076	119997	1.69628	17.9255	1.36246	0.500325	1.73541	0.0650745	1.07487	0.619377	406.413	4.23357	411.922	5.8763	442.892	30.3008	406.413	4.23357	91.7634
GBDS-18-Spot 51	462.247	317171	1.30654	18.1517	0.627735	0.494853	1.49311	0.0651751	1.35475	0.907329	407.021	5.34363	408.212	5.01884	414.93	14.0282	407.021	5.34363	98.094
GBDS-18-Spot 47	77.6449	101017	0.569425	18.2696	1.38802	0.492286	1.89851	0.0652581	1.29528	0.68226	407.524	5.11518	406.467	6.35937	400.446	31.099	407.524	5.11518	101.768
GBDS-18-Spot 225	1335.04	267071	1.65333	17.8559	0.719734	0.50581	1.16829	0.0655325	0.920261	0.7877	409.184	3.64854	415.628	3.98473	451.534	15.9912	409.184	3.64854	90.621
GBDS-18-Spot 9	263.153	127612	0.60405	18.0959	1.0388	0.499433	1.51186	0.0655759	1.09846	0.726561	409.447	4.35774	411.319	5.11322	421.815	23.188	409.447	4.35774	97.0678
GBDS-18-Spot 297	789.182	144512	0.835512	17.7704	0.778685	0.51143	1.3423	0.0659433	1.09335	0.814535	411.669	4.36026	419.411	4.61189	462.231	17.2596	411.669	4.36026	89.0612
GBDS-18-Spot 234	407.023	6.20464e+06	0.969201	17.9452	0.818114	0.506642	1.32419	0.0659686	1.04123	0.786317	411.822	4.15392	416.189	4.52141	440.448	18.2241	411.822	4.15392	93.5006
GBDS-18-Spot 199	1152.52	918438	1.73827	18.1521	0.590794	0.501021	1.10812	0.0659888	0.937495	0.846022	411.944	3.74115	412.393	3.75568	414.886	13.203	411.944	3.74115	99.2908
GBDS-18-Spot 186	305.274	267905	2.0763	18.2593	0.841277	0.500206	1.44713	0.0662707	1.17748	0.813661	413.649	4.71764	411.842	4.89937	401.706	18.8438	413.649	4.71764	102.973
GBDS-18-Spot 76	379.297	238698	3.0021	18.2726	0.907613	0.500718	1.37146	0.0663867	1.02818	0.749694	414.35	4.12622	412.188	4.64634	400.083	20.3361	414.35	4.12622	103.566
GBDS-18-Spot 211	666.418	286194	1.56462	18.0298	0.86478	0.507826	1.31071	0.0664345	0.984949	0.75146	414.639	3.95541	416.986	4.48233	429.972	19.2753	414.639	3.95541	96.4338
GBDS-18-Spot 124	334.841	93358.2	1.15576	18.2201	0.982763	0.502905	1.56378	0.066485	1.21638	0.777847	414.944	4.88829	413.667	5.31329	406.526	21.9952	414.944	4.88829	102.071
GBDS-18-Spot 26	459.054	276204	3.24778	18.1216	0.791986	0.506803	1.34574	0.0666382	1.08802	0.808488	415.87	4.38187	416.297	4.59597	418.64	17.6878	415.87	4.38187	99.3383
GBDS-18-Spot 213	225.676	71019.4	2.94473	18.0391	0.784234	0.513076	1.13573	0.067156	0.821497	0.723322	418.999	3.33259	420.515	3.91046	428.818	17.4837	418.999	3.33259	97.7101
GBDS-18-Spot 285	131.937	64188	0.605004	18.0932	0.999775	0.512396	1.36928	0.067268	0.935614	0.68329	419.675	3.80146	420.059	4.71048	422.145	22.3151	419.675	3.80146	99.415
GBDS-18-Spot 283	468.737	1.30487e+06	2.48551	18.2152	0.624142	0.509927	1.03332	0.0673954	0.823527	0.796972	420.445	3.35198	418.4	3.54339	407.124	13.967	420.445	3.35198	103.272
GBDS-18-Spot 270	553.112	180641	0.67361	17.9521	0.679428	0.520326	1.19776	0.0677765	0.986412	0.823547	422.746	4.03623	425.369	4.16238	439.587	15.1285	422.746	4.03623	96.169
GBDS-18-Spot 157	1107.89	1.70132e+06	2.51506	17.8052	0.811169	0.53291	1.4933	0.0688474	1.25377	0.839599	429.208	5.20605	433.739	5.27129	457.872	17.9964	429.208	5.20605	93.7397
GBDS-18-Spot 309	491.779	282066	1.21937	18.0437	0.739709	0.528056	1.1865	0.0691342	0.92769	0.781872	430.937	3.86707	430.519	4.16333	428.258	16.4929	430.937	3.86707	100.626
GBDS-18-Spot 143	487.05	2.86327e+06	2.44316	18.026	0.958215	0.53239	1.48426	0.0696335	1.13351	0.763688	433.947	4.75694	433.395	5.23606	430.438	21.3559	433.947	4.75694	100.815
GBDS-18-Spot 277	481.787	232970	2.00382	17.9492	0.878705	0.538564	1.31624	0.0701408	0.979988	0.744534	437.004	4.14065	437.477	4.67833	439.947	19.5666	437.004	4.14065	99.3309
GBDS-18-Spot 159	498.576	202355	1.71995	18.0548	0.683244	0.536613	1.2271	0.0702979	1.01928	0.830648	437.95	4.3157	436.189	4.35119	426.882	15.2368	437.95	4.3157	102.593
GBDS-18-Spot 313	159.042	181472	1.14423	18.0896	0.871067	0.536587	1.52837	0.07043	1.25585	0.821691	438.746	5.32665	436.172	5.41932	422.584	19.4406	438.746	5.32665	103.825
GBDS-18-Spot 33	183.229	50881.3	0.907788	18.0874	0.815287	0.543038	1.32732	0.071268	1.04742	0.789122	443.79	4.49194	440.426	4.7431	422.858	18.1943	443.79	4.49194	104.95
GBDS-18-Spot 64	191.69	102546	1.60741	17.7833	1.0829	0.552613	1.6326	0.0713052	1.22176	0.748354	444.014	5.2422	446.707	5.90029	460.576	24.0252	444.014	5.2422	96.4042
GBDS-18-Spot 5	294.613	91340.4	1.01193	17.7462	0.861846	0.560763	1.62157	0.0722058	1.37358	0.847066	449.431	5.96301	452.023	5.9158	465.243	19.114	449.431	5.96301	96.6013
GBDS-18-Spot 32	53.8866	47308.4	2.49089	17.8935	1.17186	0.561001	1.56724	0.0728363	1.04066	0.664008	453.221	4.5545	452.178	5.71912	446.856	26.0541	453.221	4.5545	101.424
GBDS-18-Spot 83	318.388	87714	1.48157	17.8918	0.722378	0.570363	1.02777	0.0740444	0.731086	0.71133	460.476	3.24905	458.249	3.79036	447.076	16.075	460.476	3.24905	102.997
GBDS-18-Spot 218	361.118	109082	1.28957	17.79	0.817054	0.574438	1.26011	0.0741493	0.95932	0.7613	461.106	4.26898	460.881	4.66829	459.747	18.1179	461.106	4.26898	100.295
GBDS-18-Spot 70	284.866	150313	6.13019	17.6635	0.837699	0.597677	1.56801	0.0766005	1.32549	0.845332	475.8	6.07957	475.759	5.95611	475.544	18.5086	475.8	6.07957	100.054
GBDS-18-Spot 114	400.388	3.66244e+06	1.72098	17.1088	0.842315	0.651207	1.19601	0.08084	0.849086	0.709932	501.135	4.09388	509.221	4.78945	545.678	18.3841	501.135	4.09388	91.8371
GBDS-18-Spot 219	125.363	407489	2.62896	17.2712	1.14598	0.649282	2.3318	0.0813663	2.03077	0.870903	504.273	9.85035	508.037	9.32121	524.994	25.122	504.273	9.85035	96.0531
GBDS-18-Spot 220	279.412	300234	1.23285	17.2541	0.801634	0.674897	1.15844	0.0844922	0.83628	0.721903	522.881	4.20011	523.685	4.73975	527.215	17.5712	522.881	4.20011	99.1778
GBDS-18-Spot 197	181.155	80229	0.772359	16.2942	1.00216	0.721694	1.68078	0.0853245	1.34933	0.802801	527.826	6.83835	551.667	7.15394	651.346	21.4991	527.826	6.83835	81.0361
GBDS-18-Spot 72	319.446	569539	1.59581	17.1228	0.895238	0.693299	1.3331	0.0861358	0.987783	0.740965	532.643	5.04986	534.781	5.54224	543.93	19.5677	532.643	5.04986	97.9249
GBDS-18-Spot 69	218.611	68955.3	1.70176	17.1066	0.802226	0.697006	1.35196	0.086514	1.08822	0.804921	534.888	5.58581	537.001	5.63833	545.966	17.5076	534.888	5.58581	97.9709
GBDS-18-Spot 38	225.207	71717	1.98029	17.0254	0.795487	0.711938	1.32265	0.0879481	1.0567	0.798922	543.39	5.50663	545.896	5.58513	556.374	17.3338	543.39	5.50663	97.6663
GBDS-18-Spot 50	527.747	416857	1.14299	17.0729	0.69384	0.710234	1.2229	0.0879824	1.00701	0.82346	543.593	5.24957	544.885	5.15667	550.299	15.1695	543.593	5.24957	98.7815
GBDS-18-Spot 127	166.671	47260.8	1.56634	17.1679	0.72085	0.707323	1.38808	0.0881095	1.18622	0.854582	544.347	6.19206	543.155	5.83915	538.144	15.7918	544.347	6.19206	101.153
GBDS-18-Spot 54	481.889	136517	0.934525	16.3564	0.734776	0.74792	1.22767	0.0887626	0.983502	0.801113	548.215	5.16881	567.017	5.33395	643.188	15.8142	548.215	5.16881	85.234
GBDS-18-Spot 126	151.468	64598	2.09249	17.1029	0.959554	0.71539	1.58685	0.0887767	1.26386	0.79646	548.298	6.64322	547.942	6.71973	546.439	20.9641	548.298	6.64322	100.34
GBDS-18-Spot 89	189.766	88417.7	2.77217	17.1284	0.907429	0.7146	1.70609	0.0888111	1.44475	0.846821	548.502	7.59672	547.474	7.22002	543.195	19.8367	548.502	7.59672	100.977
GBDS-18-Spot 91	220.462	191528	1.90009	17.2196	1.09909	0.71578	1.55013	0.0894314	1.09313	0.705182	552.174	5.78468	548.173	6.56634	531.6	24.0726	552.174	5.78468	103.87
GBDS-18-Spot 36	366.589	110610	0.952027	16.4782	1.01999	0.76595	1.65648	0.0915796	1.3052	0.787935	564.872	7.05891	577.437	7.29533	627.17	21.9867	564.872	7.05891	90.0669
GBDS-18-Spot 59	1003.4	66686.5	1.5584	15.9738	0.972037	0.801362	1.36012	0.0928807	0.951356	0.699463	572.551	5.21211	597.597	6.14385	693.823	20.724	572.551	5.21211	82.5212
GBDS-18-Spot 256	592.906	130315	0.832509	16.4911	0.790723	0.777426	1.46244	0.0930241	1.23024	0.841224	573.397	6.74955	584.014	6.49504	625.49	17.0677	573.397	6.74955	91.6717
GBDS-18-Spot 123	769.493	326227	1.2573	16.5596	0.578667	0.794004	1.13722	0.0954025	0.978991	0.86086	587.409	5.49646	593.441	5.11069	616.546	12.4938	587.409	5.49646	95.2743
GBDS-18-Spot 34	538.123	456315	18.5045	16.3876	0.663276	0.807702	1.14229	0.0960407	0.929996	0.81415	591.164	5.25325	601.164	5.18244	639.079	14.2672	591.164	5.25325	92.5025
GBDS-18-Spot 74	669.951	194057	2.17783	16.5346	0.807167	0.803797	1.28647	0.0964333	1.00174	0.778675	593.472	5.67961	598.968	5.82094	619.809	17.4385	593.472	5.67961	95.7509
GBDS-18-Spot 57	418.092	544511	1.75652	16.6132	0.816693	0.801204	1.32061	0.0965793	1.0378	0.785849	594.331	5.89219	597.507	5.96473	609.562	17.6549	594.331	5.89219	97.5013
GBDS-18-Spot 231	108.159	3.37232e+06	0.950086	16.7509	0.940772	0.808595	1.33923	0.0982782	0.953151	0.711713	604.311	5.49826	601.665	6.07969	591.689	20.3798	604.311	5.49826	102.133
GBDS-18-Spot 264	240.332	111039	1.705	16.5856	0.66109	0.819918	1.25372	0.0986713	1.06525	0.849677	606.618	6.1673	608.003	5.73526	613.149	14.2714	606.618	6.1673	98.9348
GBDS-18-Spot 14	676.472	1.06098e+06	2.23505	16.3998	0.681055	0.831878	1.18097	0.0989888	0.964806	0.816962	608.48	5.6021	614.653	5.44547	637.482	14.6579	608.48	5.6021	95.4506
GBDS-18-Spot 228	116.103	440697	0.911947	16.5637	0.817548	0.824947	1.75445	0.0991453	1.55232	0.884792	609.398	9.02645	610.805	8.05295	616.004	17.6565	609.398	9.02645	98.9276
GBDS-18-Spot 104	81.4607	57254.3	1.0454	16.7337	0.678236	0.816831	1.44047	0.0991775	1.27081	0.882217	609.587	7.3917	606.279	6.57596	593.936	14.6999	609.587	7.3917	102.635
GBDS-18-Spot 274	356.73	117769	1.32921	16.2478	0.642515	0.842033	1.41211	0.0992683	1.25747	0.89049	610.119	7.3202	620.267	6.55445	657.45	13.7786	610.119	7.3202	92.8009
GBDS-18-Spot 212	453.911	350857	4.08401	16.651	0.844071	0.822107	1.29556	0.0993247	0.98286	0.758639	610.45	5.72455	609.223	5.93535	604.643	18.2611	610.45	5.72455	100.96
GBDS-18-Spot 190	287.976	227031	1.52885	16.6534	0.803302	0.826744	1.63323	0.0998993	1.42202	0.870681	613.819	8.32596	611.804	7.50549	604.331	17.3754	613.819	8.32596	101.57
GBDS-18-Spot 44	418.54	267715	1.72013	16.4803	0.932254	0.835727	1.27242	0.099935	0.866003	0.680594	614.028	5.07211	616.785	5.88196	626.895	20.114	614.028	5.07211	97.9476
GBDS-18-Spot 77	296.474	258193	0.922377	16.6324	0.710072	0.829143	1.23731	0.100063	1.01328	0.818937	614.776	5.94159	613.137	5.69502	607.066	15.3562	614.776	5.94159	101.27
GBDS-18-Spot 206	2518.92	1.66103e+06	1.68178	16.7729	0.643691	0.82635	1.17946	0.100568	0.988331	0.837949	617.738	5.8219	611.585	5.41874	588.882	13.9632	617.738	5.8219	104.9
GBDS-18-Spot 223	180.674	1.13761e+06	1.34167	16.5594	0.869505	0.837725	1.4795	0.100655	1.19703	0.809077	618.245	7.05676	617.889	6.84812	616.564	18.7739	618.245	7.05676	100.273
GBDS-18-Spot 294	240.438	101385	2.21783	16.2976	0.816969	0.852523	1.36956	0.100813	1.09921	0.802599	619.172	6.48936	626.033	6.3997	650.922	17.5262	619.172	6.48936	95.1223
GBDS-18-Spot 128	163.465	278819	0.63132	16.6173	0.697586	0.839245	1.39537	0.10119	1.20849	0.866067	621.38	7.15874	618.729	6.46511	609.022	15.0662	621.38	7.15874	102.029
GBDS-18-Spot 188	126.175	74296.8	1.86283	16.3085	1.26029	0.867389	1.88172	0.10264	1.39733	0.742581	629.861	8.38494	634.149	8.87514	649.466	27.0741	629.861	8.38494	96.9814
GBDS-18-Spot 19	132.222	37336.8	1.32527	15.9123	1.45478	0.890564	1.77685	0.102822	1.0202	0.574163	630.924	6.13176	646.672	8.49896	702.07	30.9704	630.924	6.13176	89.8663
GBDS-18-Spot 96	130.125	19791	1.00165	15.7623	0.839849	0.906572	1.44608	0.103683	1.1772	0.814064	635.958	7.12908	655.233	6.98198	722.16	17.8206	635.958	7.12908	88.0633
GBDS-18-Spot 191	147.833	134160	1.06524	16.3279	0.643012	0.879434	1.35625	0.104189	1.19413	0.880465	638.909	7.26352	640.677	6.44394	646.937	13.7929	638.909	7.26352	98.7591
GBDS-18-Spot 196	138.29	21526	1.42472	16.3391	0.891277	0.907982	1.42942	0.107645	1.11753	0.781806	659.055	7.00117	655.985	6.90718	645.46	19.1634	659.055	7.00117	102.106
GBDS-18-Spot 189	120.979	175607	1.32417	16.2812	0.720297	0.913473	1.41657	0.107912	1.21977	0.861074	660.611	7.65883	658.902	6.8667	653.048	15.4495	660.611	7.65883	101.158
GBDS-18-Spot 85	333.255	211874	2.07619	16.2156	0.880191	0.938558	1.65506	0.110429	1.4016	0.846858	675.238	8.98533	672.127	8.13644	661.695	18.8421	675.238	8.98533	102.047
GBDS-18-Spot 53	226.418	603934	1.08057	15.7467	1.13953	1.02988	1.74876	0.11767	1.32651	0.758542	717.14	9.00287	718.869	9.00924	724.249	24.1714	717.14	9.00287	99.0184
GBDS-18-Spot 239	97.5519	47105	1.11086	15.8491	0.937029	1.05505	1.42749	0.121329	1.07689	0.754397	738.208	7.51142	731.378	7.44149	710.507	19.9384	738.208	7.51142	103.899
GBDS-18-Spot 272	126.833	126059	1.9903	15.2491	0.614543	1.17119	1.14878	0.129587	0.97058	0.844881	785.508	7.17779	787.202	6.29218	791.987	12.8923	785.508	7.17779	99.1818
GBDS-18-Spot 103	298.069	392001	4.88285	14.0499	1.00139	1.30994	2.00184	0.133541	1.73337	0.86589	808.032	13.164	850.101	11.5273	961.568	20.4557	808.032	13.164	84.0327
GBDS-18-Spot 287	296.755	107994	4.2369	14.0792	0.777213	1.49939	1.55446	0.153173	1.34622	0.866032	918.724	11.5271	930.14	9.469	957.273	15.8931	957.273	15.8931	95.973
GBDS-18-Spot 31	504.899	1.41706e+06	2.23119	13.981	0.833035	1.48628	1.24696	0.150775	0.927879	0.744114	905.304	7.83696	924.798	7.56904	971.599	17.0104	971.599	17.0104	93.1767
GBDS-18-Spot 254	25.7261	64107.9	0.832006	13.8887	0.927732	1.6674	1.3598	0.168031	0.994167	0.731113	1001.25	9.2196	996.197	8.63111	985.084	18.8741	985.084	18.8741	101.641
GBDS-18-Spot 290	110.665	57180.5	2.47549	13.87	0.78113	1.73352	1.38778	0.174459	1.14707	0.82655	1036.63	10.9841	1021.06	8.93651	987.799	15.8787	987.799	15.8787	104.944
GBDS-18-Spot 112	166.806	104928	2.2805	13.8584	0.660909	1.47428	1.22404	0.148245	1.03027	0.841702	891.119	8.57465	919.884	7.40563	989.517	13.4369	989.517	13.4369	90.0559
GBDS-18-Spot 63	122.835	46189.1	2.47373	13.8472	0.986323	1.65977	1.43565	0.166763	1.0432	0.726637	994.252	9.61174	993.29	9.09692	991.17	20.0391	991.17	20.0391	100.311
GBDS-18-Spot 136	48.5113	14052	2.81149	13.8213	0.921947	1.65678	1.37312	0.166151	1.01758	0.741072	990.869	9.34619	992.146	8.69477	994.992	18.7343	994.992	18.7343	99.5856
GBDS-18-Spot 276	82.8402	56484	3.14342	13.7702	0.7789	1.74644	1.28316	0.174494	1.01972	0.79469	1036.82	9.76625	1025.85	8.28524	1002.49	15.8109	1002.49	15.8109	103.425
GBDS-18-Spot 68	174.554	42852.9	4.26912	13.7491	0.90668	1.531	1.71858	0.152735	1.45995	0.849508	916.274	12.4699	942.901	10.556	1005.6	18.398	1005.6	18.398	91.1173
GBDS-18-Spot 306	108.336	113826	2.43688	13.7202	0.889681	1.72665	1.34612	0.171891	1.0102	0.750455	1022.52	9.55198	1018.51	8.65566	1009.86	18.0409	1009.86	18.0409	101.253
GBDS-18-Spot 135	256.805	351396	3.76257	13.7156	0.48513	1.68702	1.10735	0.16789	0.995423	0.898926	1000.47	9.22462	1003.64	7.05943	1010.54	9.83592	1010.54	9.83592	99.0043
GBDS-18-Spot 310	365.327	2.43812e+06	32.2456	13.6988	0.898678	1.60632	1.429	0.159662	1.11104	0.777497	954.9	9.86097	972.676	8.94288	1013.03	18.2121	1013.03	18.2121	94.2621
GBDS-18-Spot 296	637.611	187184	8.28356	13.6935	0.468633	1.67684	1.10397	0.166608	0.999565	0.905429	993.393	9.20237	999.785	7.02204	1013.81	9.49685	1013.81	9.49685	97.9862
GBDS-18-Spot 244	170.159	132102	2.55071	13.6815	0.642241	1.74194	1.1977	0.172924	1.01095	0.844073	1028.2	9.60801	1024.18	7.72614	1015.59	13.012	1015.59	13.012	101.242
GBDS-18-Spot 97	2374.01	244303	4.93344	13.6595	0.728879	1.61535	1.08462	0.160099	0.803204	0.740539	957.328	7.1456	976.188	6.80223	1018.85	14.7595	1018.85	14.7595	93.9618
GBDS-18-Spot 250	32.6561	175913	2.06488	13.6197	1.07734	1.78381	1.54338	0.17628	1.10514	0.716056	1046.62	10.6765	1039.57	10.0421	1024.75	21.8155	1024.75	21.8155	102.134
GBDS-18-Spot 109	225.416	492637	2.96512	13.6023	0.794095	1.71805	1.24597	0.169565	0.960128	0.770589	1009.71	8.97344	1015.3	7.99693	1027.34	16.0798	1027.34	16.0798	98.2844
GBDS-18-Spot 230	541.218	262146	3.88255	13.5997	0.523522	1.69767	1.07732	0.167521	0.941561	0.873987	998.441	8.70909	1007.65	6.88406	1027.72	10.5878	1027.72	10.5878	97.1508
GBDS-18-Spot 98	265.994	1.75657e+06	4.04493	13.5992	0.748684	1.65969	1.42927	0.163767	1.21749	0.851827	977.678	11.0445	993.257	9.05632	1027.81	15.1588	1027.81	15.1588	95.1229
GBDS-18-Spot 238	64.0323	32985.3	2.20892	13.5718	1.08694	1.76407	1.55777	0.173717	1.11589	0.716338	1032.56	10.6468	1032.35	10.0952	1031.87	21.9873	1031.87	21.9873	100.066
GBDS-18-Spot 207	1164.88	234712	4.70276	13.5408	0.585864	1.57833	1.22454	0.155071	1.07529	0.878121	929.324	9.30604	961.711	7.61146	1036.5	11.8518	1036.5	11.8518	89.6601
GBDS-18-Spot 291	461.773	532588	10.3933	13.5386	1.40176	1.52137	2.38236	0.14945	1.92632	0.808575	897.878	16.1456	939.029	14.5971	1036.83	28.3294	1036.83	28.3294	86.5983
GBDS-18-Spot 235	186.091	267707	5.06183	13.5264	0.725069	1.74487	1.23063	0.171251	0.994341	0.807996	1019	9.37212	1025.27	7.9434	1038.65	14.6585	1038.65	14.6585	98.1087
GBDS-18-Spot 80	60.5404	200411	4.94741	13.5219	0.825712	1.5662	2.59228	0.153663	2.45725	0.947913	921.467	21.099	956.922	16.0658	1039.32	16.6883	1039.32	16.6883	88.6603
GBDS-18-Spot 216	501.169	729339	13.9269	13.5083	0.782191	1.65286	1.34826	0.162003	1.09818	0.814512	967.901	9.86978	990.646	8.52975	1041.35	15.8051	1041.35	15.8051	92.947
GBDS-18-Spot 137	270.638	148432	2.00475	13.4891	0.731478	1.76556	1.44358	0.172804	1.24454	0.862116	1027.54	11.821	1032.89	9.358	1044.26	14.775	1044.26	14.775	98.3989
GBDS-18-Spot 58	526.14	566054	5.36795	13.4456	0.772492	1.56657	1.39646	0.152833	1.16334	0.833063	916.826	9.94208	957.069	8.65498	1050.77	15.5871	1050.77	15.5871	87.2531
GBDS-18-Spot 268	581.084	364058	2.66519	13.4047	0.546125	1.74523	1.36057	0.169745	1.24615	0.915905	1010.7	11.6572	1025.4	8.78284	1056.91	10.9961	1056.91	10.9961	95.6284
GBDS-18-Spot 194	1111.26	108877	1.87201	13.3911	0.71331	1.45843	1.17063	0.141706	0.928199	0.792908	854.305	7.42668	913.361	7.05152	1058.95	14.3572	1058.95	14.3572	80.6747
GBDS-18-Spot 164	128.425	825927	1.7791	13.3827	0.906989	1.81475	1.90547	0.176217	1.67577	0.87945	1046.27	16.1843	1050.79	12.4748	1060.22	18.2672	1060.22	18.2672	98.685
GBDS-18-Spot 177	209.287	303235	3.03669	13.3737	0.792977	1.78022	1.36577	0.172748	1.11198	0.814181	1027.23	10.559	1038.26	8.87996	1061.57	15.9363	1061.57	15.9363	96.7658
GBDS-18-Spot 8	347.289	140566	2.22505	13.3604	0.998588	1.79359	1.48304	0.173872	1.09646	0.739333	1033.41	10.4694	1043.13	9.66842	1063.56	20.0796	1063.56	20.0796	97.1651
GBDS-18-Spot 202	764.891	4.23896e+06	2.88074	13.3206	0.690926	1.85805	1.59057	0.179584	1.43267	0.900726	1064.7	14.0606	1066.29	10.4999	1069.57	13.8675	1069.57	13.8675	99.5455
GBDS-18-Spot 20	966.197	845497	6.10589	13.3103	0.681467	1.67511	1.1781	0.161778	0.961001	0.815721	966.651	8.62658	999.127	7.49069	1071.12	13.6907	1071.12	13.6907	90.2471
GBDS-18-Spot 280	459.299	248503	3.66198	13.2826	0.866241	1.86945	1.67814	0.180171	1.43728	0.856473	1067.91	14.1449	1070.34	11.1017	1075.28	17.3938	1075.28	17.3938	99.3143
GBDS-18-Spot 251	204.621	1.14694e+06	6.14245	13.2722	0.784742	1.69087	1.54637	0.162833	1.33245	0.861667	972.499	12.028	1005.09	9.86674	1076.85	15.7529	1076.85	15.7529	90.3095
GBDS-18-Spot 28	90.3111	38180.1	2.05765	13.1166	1.11609	1.73854	1.70733	0.165461	1.29202	0.756748	987.051	11.8245	1022.92	11.006	1100.49	22.3265	1100.49	22.3265	89.6923
GBDS-18-Spot 113	115.155	276153	3.9845	13.0796	0.879262	1.88314	1.44194	0.178717	1.14284	0.792573	1059.96	11.1702	1075.17	9.56329	1106.12	17.5887	1106.12	17.5887	95.8271
GBDS-18-Spot 116	431.91	296453	9.2275	12.9081	1.00484	1.71469	1.62528	0.160596	1.27743	0.785976	960.089	11.3949	1014.04	10.4241	1132.45	20.0068	1132.45	20.0068	84.7795
GBDS-18-Spot 93	682.915	1.12235e+07	19.112	12.8349	0.632696	1.9123	1.38676	0.178089	1.23402	0.889857	1056.52	12.0254	1085.39	9.24622	1143.79	12.575	1143.79	12.575	92.3707
GBDS-18-Spot 139	794.611	965935	4.27389	12.6764	0.778015	1.85995	1.14668	0.171074	0.842355	0.734605	1018.03	7.93255	1066.97	7.5722	1168.45	15.4259	1168.45	15.4259	87.1258
GBDS-18-Spot 221	19.0942	134751	4.49508	12.6023	1.12082	1.78126	1.96476	0.162878	1.61371	0.821326	972.753	14.5705	1038.64	12.7776	1180.05	22.1606	1180.05	22.1606	82.4329
GBDS-18-Spot 170	75.9927	84691.9	1.58099	12.5403	0.902833	2.23378	1.21048	0.203253	0.806317	0.666115	1192.77	8.7802	1191.7	8.49036	1189.75	17.8223	1189.75	17.8223	100.254
GBDS-18-Spot 2	531.524	310658	2.63598	12.5223	0.77468	2.2546	1.30822	0.204852	1.05418	0.805817	1201.33	11.5542	1198.22	9.20224	1192.62	15.2845	1192.62	15.2845	100.731
GBDS-18-Spot 16	55.4409	2.55332e+06	3.75413	12.3743	0.698681	2.36653	1.1564	0.212482	0.921474	0.796845	1242.03	10.4099	1232.56	8.25427	1216.01	13.7606	1216.01	13.7606	102.139
GBDS-18-Spot 3	86.6521	20496.2	1.80758	12.2645	1.01588	2.20254	1.5146	0.196002	1.12339	0.741708	1153.81	11.8681	1181.85	10.5773	1233.57	19.9306	1233.57	19.9306	93.5345
GBDS-18-Spot 101	652.344	2.15062e+06	0.960744	12.2359	0.86226	2.28928	1.30837	0.203247	0.984039	0.752112	1192.74	10.7152	1208.99	9.24634	1238.13	16.9245	1238.13	16.9245	96.3342
GBDS-18-Spot 42	203.3	191912	3.05775	12.2195	0.755251	2.27552	1.43907	0.201755	1.22496	0.851214	1184.74	13.257	1204.73	10.1514	1240.75	14.8194	1240.75	14.8194	95.4857
GBDS-18-Spot 315	220.266	246863	2.6606	12.0522	0.574053	2.48645	1.22918	0.217438	1.08689	0.884245	1268.32	12.5139	1268.1	8.90126	1267.71	11.1894	1267.71	11.1894	100.048
GBDS-18-Spot 129	432.091	342856	3.34813	11.9988	0.730905	2.41082	1.12572	0.209889	0.856164	0.76055	1228.23	9.57459	1245.83	8.07931	1276.36	14.2334	1276.36	14.2334	96.2289
GBDS-18-Spot 138	242.02	285526	1.51263	11.9416	0.596446	2.6473	1.09486	0.229379	0.918137	0.838587	1331.24	11.0432	1313.89	8.0692	1285.67	11.6148	1285.67	11.6148	103.544
GBDS-18-Spot 147	89.5454	61923.8	5.35792	11.6528	0.887475	2.75276	1.37277	0.232748	1.04732	0.762926	1348.89	12.7471	1342.83	10.2249	1333.19	17.1665	1333.19	17.1665	101.178
GBDS-18-Spot 273	605.082	2.42975e+06	2.8753	11.5206	0.792712	2.62827	1.18992	0.219702	0.887428	0.745785	1280.3	10.3046	1308.58	8.75247	1355.22	15.2866	1355.22	15.2866	94.472
GBDS-18-Spot 15	120.158	86873.3	1.30143	11.312	0.549363	2.79375	1.04906	0.229305	0.893712	0.851919	1330.86	10.7466	1353.87	7.84435	1390.38	10.5421	1390.38	10.5421	95.7187
GBDS-18-Spot 86	283.192	179426	3.19443	10.8983	0.811757	3.20202	1.55366	0.253204	1.32473	0.852651	1454.98	17.2542	1457.65	12.0219	1461.53	15.4281	1461.53	15.4281	99.5521
GBDS-18-Spot 171	129.536	187320	1.02683	10.8429	0.647693	3.11554	1.36747	0.245114	1.20435	0.880716	1413.23	15.2838	1436.53	10.5116	1471.2	12.2938	1471.2	12.2938	96.0592
GBDS-18-Spot 152	187.031	710692	1.77572	10.742	0.525966	3.27519	1.28162	0.255276	1.16872	0.91191	1465.63	15.3215	1475.18	9.96977	1488.93	9.95962	1488.93	9.95962	98.4352
GBDS-18-Spot 49	131.647	165112	2.09076	10.6837	0.658131	3.32543	1.06909	0.257785	0.842508	0.78806	1478.5	11.1313	1487.04	8.34589	1499.22	12.4452	1499.22	12.4452	98.6179
GBDS-18-Spot 176	54.5125	99348.9	0.785663	10.6181	0.858495	3.4226	1.30225	0.263689	0.979203	0.751932	1508.69	13.1717	1509.6	10.2333	1510.86	16.2075	1510.86	16.2075	99.8563
GBDS-18-Spot 145	341.452	292545	2.08311	10.3894	0.520059	3.08217	1.71341	0.232345	1.63258	0.952824	1346.78	19.8424	1428.27	13.1365	1551.87	9.76592	1551.87	9.76592	86.7843
GBDS-18-Spot 154	269.906	275396	1.27038	9.78665	0.789313	4.19884	1.81725	0.298161	1.63688	0.900747	1682.18	24.236	1673.79	14.9039	1663.27	14.6081	1663.27	14.6081	101.137
GBDS-18-Spot 110	129.3	657254	1.33446	9.11379	0.701561	4.85178	1.24714	0.320839	1.0311	0.826772	1793.83	16.1457	1793.92	10.4996	1794.02	12.7745	1794.02	12.7745	99.9893
GBDS-18-Spot 184	124.389	109565	1.63126	8.99398	0.691685	4.94666	1.37464	0.322813	1.18795	0.864185	1803.45	18.6883	1810.25	11.6112	1818.08	12.5557	1818.08	12.5557	99.1958
GBDS-18-Spot 87	115.416	98140	0.987162	8.97049	0.871029	4.88493	1.36117	0.317952	1.04599	0.768448	1779.72	16.267	1799.66	11.473	1822.82	15.8027	1822.82	15.8027	97.6354
GBDS-18-Spot 298	99.5476	94793.3	1.03068	8.50343	0.749303	5.17806	1.24338	0.319484	0.992241	0.798018	1787.21	15.4875	1849.02	10.5819	1919.27	13.4369	1919.27	13.4369	93.1193
GBDS-18-Spot 131	107.973	137936	1.1689	8.41297	0.735445	5.79267	1.15916	0.353603	0.895979	0.772954	1951.78	15.0884	1945.32	10.0375	1938.42	13.1585	1938.42	13.1585	100.689
GBDS-18-Spot 245	105.84	134120	0.829426	8.32867	0.770174	5.85233	1.23708	0.353665	0.968086	0.78256	1952.08	16.3047	1954.2	10.7284	1956.43	13.7507	1956.43	13.7507	99.7777
GBDS-18-Spot 27	92.0307	188448	0.850487	8.22479	0.882086	6.00677	1.30184	0.358471	0.957451	0.73546	1974.92	16.2869	1976.83	11.3326	1978.8	15.708	1978.8	15.708	99.8037
GBDS-18-Spot 312	40.2819	343701	2.10921	8.17245	0.734761	5.95213	1.25359	0.352949	1.01568	0.81022	1948.67	17.0808	1968.88	10.8982	1990.17	13.0667	1990.17	13.0667	97.9148
GBDS-18-Spot 66	428.802	248527	6.20247	8.02409	0.70522	5.70396	1.20083	0.332093	0.97194	0.809387	1848.52	15.6201	1931.97	10.3746	2022.69	12.4962	2022.69	12.4962	91.3893
GBDS-18-Spot 260	137.278	4.46486e+06	2.16305	7.80805	0.799273	6.61862	1.58428	0.374971	1.36788	0.86341	2052.75	24.0477	2061.83	13.9759	2070.91	14.0828	2070.91	14.0828	99.123
GBDS-18-Spot 266	257.744	1.06245e+06	3.22447	7.74493	0.736446	6.42612	1.40896	0.361122	1.20117	0.852524	1987.49	20.5438	2035.85	12.3804	2085.2	12.9547	2085.2	12.9547	95.3142
GBDS-18-Spot 25	412.119	51862.8	7.79312	7.73415	0.937083	6.53321	1.40017	0.366629	1.04036	0.743024	2013.52	17.992	2050.38	12.3304	2087.65	16.4803	2087.65	16.4803	96.4492
GBDS-18-Spot 229	621.913	426432	17.2535	7.26799	0.708316	7.1833	1.25444	0.378814	1.03533	0.825331	2070.74	18.3365	2134.43	11.1813	2196.31	12.3067	2196.31	12.3067	94.2826
GBDS-18-Spot 241	131.361	789807	1.59279	4.86108	0.796686	15.5565	1.78038	0.548698	1.59218	0.894294	2819.76	36.3649	2849.96	16.9874	2871.37	12.9485	2871.37	12.9485	98.2024

## Sheet: Creel 1
Table _____. U-Pb geochronologic analyses.
							Isotope ratios						Apparent ages (Ma)
Analysis	U	206Pb	U/Th	206Pb*	±	207Pb*	±	206Pb*	±	error	206Pb*	±	207Pb*	±	206Pb*	±	Best age	±	Conc
	(ppm)	204Pb		207Pb*	(%)	235U*	(%)	238U	(%)	corr.	238U*	(Ma)	235U	(Ma)	207Pb*	(Ma)	(Ma)	(Ma)	(%)
GBDS-15-Spot 192	69.0118	33311.9	1.02971	19.1209	1.20847	0.348305	1.5467	0.0483232	0.965347	0.624133	304.219	2.86855	303.446	4.05705	297.508	27.5883	304.219	2.86855	NA
GBDS-15-Spot 292	2404.18	67270	0.581545	18.3752	0.477127	0.365466	0.87696	0.0487265	0.735805	0.83904	306.698	2.20386	316.287	2.38329	387.525	10.7135	306.698	2.20386	NA
GBDS-15-Spot 289	1207.17	49079.4	30.483	18.1917	0.864879	0.383083	1.37114	0.0505655	1.06395	0.775965	317.992	3.3012	329.304	3.85618	410.013	19.3449	317.992	3.3012	NA
GBDS-15-Spot 146	340.46	38040.4	2.17548	19.0341	0.89723	0.370077	1.32297	0.0511107	0.972226	0.734882	321.337	3.04753	319.71	3.62851	307.854	20.4245	321.337	3.04753	NA
GBDS-15-Spot 248	74.1458	12476.3	0.645421	19.4467	1.1803	0.362227	1.58318	0.0511111	1.05515	0.666476	321.339	3.3075	313.876	4.27459	258.829	27.1195	321.339	3.3075	NA
GBDS-15-Spot 103	265.954	340512	9.19765	18.8503	0.879608	0.374706	1.63577	0.0512504	1.37914	0.843114	322.194	4.33428	323.135	4.52725	329.903	19.9532	322.194	4.33428	NA
GBDS-15-Spot 159	96.1837	39139.6	0.890098	19.2453	0.974194	0.367044	1.48198	0.0512544	1.11679	0.753579	322.219	3.51005	317.46	4.04028	282.704	22.2952	322.219	3.51005	NA
GBDS-15-Spot 174	126.021	40052.2	1.27889	19.1883	0.95488	0.37218	1.56927	0.0518177	1.24532	0.793564	325.672	3.9549	321.268	4.32188	289.471	21.8193	325.672	3.9549	NA
GBDS-15-Spot 304	435.616	65581.8	5.38258	18.6744	0.951557	0.383326	1.86615	0.05194	1.60532	0.860232	326.421	5.10966	329.483	5.2508	351.16	21.5052	326.421	5.10966	NA
GBDS-15-Spot 303	248.386	23619.2	0.479966	19.1709	0.949838	0.374201	1.46418	0.0520516	1.11429	0.761031	327.105	3.55397	322.762	4.04839	291.545	21.713	327.105	3.55397	NA
GBDS-15-Spot 120	637.928	8734.05	0.903269	15.98	3.50277	0.449423	3.75066	0.0521099	1.34094	0.357519	327.462	4.28139	376.875	11.8091	693.017	74.6984	327.462	4.28139	NA
GBDS-15-Spot 29	150.58	184762	9.59344	18.7463	0.772375	0.383713	1.19815	0.0521929	0.915973	0.764488	327.971	2.92898	329.767	3.37368	342.471	17.4637	327.971	2.92898	NA
GBDS-15-Spot 11	270.334	41452.2	6.07113	18.6849	0.752864	0.387652	1.6849	0.0525559	1.50734	0.894618	330.194	4.85182	332.653	4.77933	349.897	17.0069	330.194	4.85182	NA
GBDS-15-Spot 249	176.608	11486.8	4.44734	19.4301	0.908251	0.373065	1.71196	0.0525953	1.45116	0.847664	330.435	4.67434	321.923	4.72302	260.79	20.8735	330.435	4.67434	NA
GBDS-15-Spot 251	169.86	69929.9	1.41838	18.6161	0.884684	0.390203	1.39581	0.052707	1.07964	0.773485	331.12	3.48463	334.518	3.97805	358.193	19.969	331.12	3.48463	NA
GBDS-15-Spot 300	320.463	63425.9	12.5771	18.987	0.694973	0.384431	1.09182	0.0529619	0.842075	0.771256	332.68	2.73036	330.293	3.07844	313.496	15.7897	332.68	2.73036	NA
GBDS-15-Spot 271	2404.18	193728	4.49674	18.7649	0.441577	0.411075	0.830572	0.0559698	0.703462	0.846962	351.069	2.4036	349.649	2.45685	340.248	9.99034	351.069	2.4036	NA
GBDS-15-Spot 310	50.5144	14719.5	1.99461	18.9945	1.14465	0.411313	1.47897	0.0566876	0.936544	0.633242	355.449	3.23883	349.82	4.37663	312.626	26.0474	355.449	3.23883	NA
GBDS-15-Spot 26	822.973	66188.9	3.5897	18.474	0.842243	0.423991	1.47668	0.0568335	1.21294	0.821393	356.339	4.20488	358.901	4.46445	375.47	18.9528	356.339	4.20488	NA
GBDS-15-Spot 224	294.093	249387	25.7056	18.6031	0.772994	0.424161	1.32696	0.0572538	1.07856	0.812808	358.902	3.76519	359.022	4.01291	359.77	17.436	358.902	3.76519	NA
GBDS-15-Spot 78	132.687	19609.9	3.43263	18.7043	0.895905	0.422137	1.34611	0.0572905	1.00468	0.746353	359.126	3.50939	357.578	4.05719	347.522	20.2401	359.126	3.50939	NA
GBDS-15-Spot 267	1108	9.54547e+06	27.3868	18.3784	0.844052	0.431633	1.40543	0.0575585	1.12375	0.799576	360.76	3.94268	364.335	4.30253	387.131	18.9553	360.76	3.94268	NA
GBDS-15-Spot 122	375.097	74516.6	9.05838	18.5945	0.814685	0.427399	1.54044	0.0576643	1.30738	0.848706	361.405	4.59494	361.328	4.68345	360.813	18.3713	361.405	4.59494	NA
GBDS-15-Spot 102	110.661	68933.6	4.37914	18.4856	0.980802	0.42996	1.65099	0.0576701	1.32808	0.804414	361.44	4.66813	363.148	5.0406	374.05	22.0766	361.44	4.66813	NA
GBDS-15-Spot 65	91.7863	23110.6	4.70569	18.8728	0.880667	0.422403	1.37179	0.0578431	1.05178	0.766719	362.495	3.70742	357.768	4.13642	327.233	19.9886	362.495	3.70742	NA
GBDS-15-Spot 195	287.73	67385.9	5.63582	18.5769	0.912195	0.43141	1.41496	0.0581503	1.08167	0.764452	364.367	3.83192	364.177	4.33014	362.948	20.5553	364.367	3.83192	NA
GBDS-15-Spot 130	668.584	57235.7	0.791757	18.0829	0.68665	0.448577	1.3147	0.0588561	1.12113	0.852769	368.665	4.01726	376.282	4.13383	423.421	15.3226	368.665	4.01726	NA
GBDS-15-Spot 275	465.247	50624.5	9.75161	18.6689	0.679596	0.439554	1.3272	0.0595414	1.14	0.858954	372.836	4.12976	369.938	4.11483	351.805	15.3346	372.836	4.12976	NA
GBDS-15-Spot 8	97.8858	11191.8	4.46518	18.7039	1.12648	0.4394	1.42731	0.0596321	0.876507	0.614095	373.388	3.17979	369.829	4.42416	347.565	25.4528	373.388	3.17979	NA
GBDS-15-Spot 279	20.8238	2898.63	251852	21.6879	1.88668	0.403055	2.20674	0.0634263	1.1446	0.518684	396.429	4.40082	343.862	6.43689	2.25887	45.4485	396.429	4.40082	NA
GBDS-15-Spot 253	1308.31	128454	3.39994	17.6182	0.843596	0.507302	1.29815	0.064851	0.986685	0.760068	405.06	3.87369	416.634	4.43634	481.259	18.6372	405.06	3.87369	84.1666
GBDS-15-Spot 147	148.018	23971.2	0.860984	18.239	0.910048	0.491976	1.56429	0.0651077	1.27233	0.813358	406.614	5.01369	406.256	5.23762	404.205	20.3761	406.614	5.01369	100.596
GBDS-15-Spot 296	247.359	61831.8	0.98337	18.0196	0.743317	0.503859	1.21368	0.0658783	0.959423	0.790509	411.276	3.82264	414.311	4.12893	431.23	16.5649	411.276	3.82264	95.3727
GBDS-15-Spot 239	455.423	83156.4	1.75269	17.9957	0.806003	0.512701	1.34577	0.0669452	1.07771	0.800811	417.725	4.35909	420.264	4.63142	434.197	17.9517	417.725	4.35909	96.2063
GBDS-15-Spot 54	284.192	76749	6.21866	18.1517	0.969836	0.513933	1.49362	0.0676882	1.13592	0.760515	422.213	4.6423	421.091	5.14841	414.928	21.6741	422.213	4.6423	101.756
GBDS-15-Spot 56	132.222	33301.2	2.13247	18.2104	0.735347	0.516702	1.41066	0.0682728	1.20384	0.853386	425.741	4.95965	422.946	4.87972	407.713	16.4549	425.741	4.95965	104.422
GBDS-15-Spot 148	285.638	83166.6	1.74051	17.9559	0.778318	0.531388	1.34426	0.0692319	1.09602	0.815332	431.526	4.57478	432.73	4.73634	439.122	17.3206	431.526	4.57478	98.2703
GBDS-15-Spot 283	666.202	259776	3.30559	18.0152	0.62094	0.529717	1.419	0.0692422	1.27593	0.899175	431.588	5.32647	431.622	4.9894	431.779	13.8361	431.588	5.32647	99.956
GBDS-15-Spot 294	243.331	61553.4	2.43951	17.7168	0.701551	0.541275	1.53945	0.0695812	1.37031	0.890126	433.632	5.74664	439.265	5.48957	468.873	15.5259	433.632	5.74664	92.484
GBDS-15-Spot 80	115.907	59907.2	1.40259	18.1131	0.948308	0.534091	1.53136	0.0701934	1.20241	0.785188	437.321	5.08398	434.521	5.41348	419.687	21.1753	437.321	5.08398	104.202
GBDS-15-Spot 62	198.277	236279	0.421378	17.669	0.734947	0.551891	1.24818	0.0707542	1.00886	0.808267	440.698	4.29746	446.234	4.50714	474.895	16.2658	440.698	4.29746	92.7991
GBDS-15-Spot 293	453.408	88048.6	0.59598	17.7417	0.657152	0.550363	1.18618	0.0708487	0.987506	0.832511	441.267	4.21174	445.235	4.27561	465.792	14.5573	441.267	4.21174	94.7346
GBDS-15-Spot 134	437.537	370455	1.25516	17.776	0.747028	0.549461	1.41285	0.0708693	1.19921	0.848786	441.391	5.11606	444.644	5.0873	461.489	16.56	441.391	5.11606	95.6449
GBDS-15-Spot 143	340.305	153131	0.826953	17.8593	0.88999	0.54875	1.52936	0.0711094	1.24372	0.813234	442.836	5.32274	444.177	5.50219	451.11	19.7665	442.836	5.32274	98.1658
GBDS-15-Spot 272	614.749	77121.4	0.706809	17.86	0.688392	0.554214	1.2632	0.0718201	1.05914	0.838462	447.112	4.57506	447.754	4.57373	451.029	15.3092	447.112	4.57506	99.1317
GBDS-15-Spot 165	47.595	162982	2.53391	17.832	1.24489	0.556354	1.66499	0.0719845	1.10563	0.664047	448.101	4.78606	449.151	6.0435	454.511	27.6516	448.101	4.78606	98.5896
GBDS-15-Spot 305	267.831	90327.5	1.6712	17.9776	0.86982	0.55751	1.48848	0.0727231	1.20789	0.811489	452.541	5.27873	449.904	5.41002	436.43	19.3838	452.541	5.27873	103.691
GBDS-15-Spot 55	128.002	94347.6	1.00034	17.7576	0.912369	0.565018	1.4459	0.0728006	1.1217	0.775779	453.007	4.90694	454.788	5.30048	463.82	20.238	453.007	4.90694	97.6687
GBDS-15-Spot 309	198.558	22573.1	13.1918	17.9981	0.740507	0.559736	1.35033	0.0730967	1.12917	0.836222	454.785	4.95836	451.354	4.92044	433.893	16.494	454.785	4.95836	104.815
GBDS-15-Spot 48	152.531	74256.8	1.52174	17.918	0.705495	0.566964	1.65892	0.073711	1.50143	0.905065	458.475	6.64458	456.049	6.09476	443.823	15.6865	458.475	6.64458	103.301
GBDS-15-Spot 166	235.785	189602	2.70146	17.782	0.666013	0.572063	1.22659	0.0738096	1.03003	0.839747	459.066	4.56408	459.348	4.53219	460.734	14.7695	459.066	4.56408	99.6381
GBDS-15-Spot 94	278.7	399358	1.45449	17.8849	0.963362	0.56909	1.59583	0.0738509	1.27224	0.79723	459.315	5.64027	457.426	5.87697	447.926	21.4056	459.315	5.64027	102.543
GBDS-15-Spot 69	345.881	260118	1.48106	17.7095	0.871555	0.578461	1.46777	0.0743307	1.18099	0.804616	462.194	5.26738	463.472	5.46175	469.828	19.2926	462.194	5.26738	98.3752
GBDS-15-Spot 123	303.556	99150.2	3.31808	17.4233	0.820253	0.59271	1.43663	0.0749307	1.17944	0.820979	465.793	5.29997	472.597	5.42855	505.773	18.045	465.793	5.29997	92.0953
GBDS-15-Spot 280	130.568	33527.4	2.00182	17.8746	0.874358	0.580793	1.54364	0.0753261	1.27214	0.824113	468.164	5.74456	464.971	5.75874	449.213	19.4448	468.164	5.74456	104.219
GBDS-15-Spot 213	596.07	72115.9	3.22097	17.5373	0.745595	0.593994	1.34465	0.0755842	1.11901	0.832191	469.711	5.06917	473.415	5.0879	491.425	16.4438	469.711	5.06917	95.5815
GBDS-15-Spot 82	279.17	95598.9	3.52725	17.3613	0.997199	0.601497	1.79825	0.0757713	1.49642	0.832157	470.833	6.7945	478.183	6.85793	513.614	21.9297	470.833	6.7945	91.6704
GBDS-15-Spot 263	405.947	78406.6	1.81416	17.5646	0.721695	0.594755	1.43232	0.0757991	1.23721	0.863783	470.999	5.61947	473.899	5.42398	487.956	15.9248	470.999	5.61947	96.525
GBDS-15-Spot 141	114.977	41647.6	0.891525	17.766	0.92803	0.591437	1.55849	0.0762406	1.25205	0.803378	473.644	5.71766	471.785	5.88107	462.77	20.5894	473.644	5.71766	102.35
GBDS-15-Spot 301	321.573	171735	16.1663	17.7723	0.648444	0.59604	1.18853	0.0768612	0.996052	0.838055	477.361	4.58298	474.717	4.50686	461.985	14.3942	477.361	4.58298	103.328
GBDS-15-Spot 140	216.389	87620.6	1.46287	17.6378	0.872666	0.601017	1.4658	0.0769165	1.17772	0.803464	477.691	5.42245	477.879	5.58726	478.761	19.2866	477.691	5.42245	99.7765
GBDS-15-Spot 139	124.776	22791.5	1.77857	17.7099	0.79035	0.600353	1.45384	0.0771454	1.22025	0.839326	479.062	5.6338	477.458	5.53785	469.738	17.4951	479.062	5.6338	101.985
GBDS-15-Spot 155	188.515	86495.9	6.93128	17.0648	0.586647	0.708837	1.11298	0.0877678	0.945819	0.849807	542.322	4.91955	544.056	4.68778	551.305	12.8059	542.322	4.91955	98.3706
GBDS-15-Spot 223	484.256	123879	1.87256	17.0708	0.631527	0.709839	1.08525	0.0879227	0.882571	0.813245	543.24	4.59802	544.651	4.57473	550.543	13.7847	543.24	4.59802	98.6734
GBDS-15-Spot 144	462.622	158361	0.901101	17.0253	0.560068	0.72129	1.33274	0.0891033	1.20934	0.907413	550.232	6.37812	551.428	5.67067	556.376	12.2145	550.232	6.37812	98.8956
GBDS-15-Spot 158	39.9066	18725.2	1.54743	16.5516	1.0157	0.7654	1.38962	0.0919215	0.948375	0.682469	566.891	5.14664	577.121	6.11755	617.583	21.9458	566.891	5.14664	91.7918
GBDS-15-Spot 231	85.8042	47468.1	8.16407	15.9669	0.99305	0.809445	1.56815	0.0937771	1.21364	0.773936	577.837	6.70776	602.143	7.12304	694.747	21.1574	577.837	6.70776	83.1723
GBDS-15-Spot 168	94.5169	17071.3	1.07557	16.7565	0.728761	0.813426	1.11528	0.0988983	0.844243	0.756982	607.949	4.89798	604.374	5.07965	590.996	15.8024	607.949	4.89798	102.869
GBDS-15-Spot 297	243.876	493746	2.14279	16.5663	0.712051	0.825319	1.35856	0.0992055	1.15701	0.851643	609.751	6.73148	611.011	6.2373	615.666	15.3967	609.751	6.73148	99.0393
GBDS-15-Spot 176	63.4492	61431.6	1.08362	16.4312	0.992546	0.852585	1.52791	0.101647	1.16163	0.760269	624.056	6.90936	626.067	7.13996	633.36	21.3913	624.056	6.90936	98.531
GBDS-15-Spot 151	221.616	77677.7	1.77806	16.2257	0.821252	0.880861	1.58887	0.103705	1.36016	0.856059	636.084	8.23865	641.448	7.55573	660.392	17.5825	636.084	8.23865	96.3192
GBDS-15-Spot 266	298.662	61899.8	1.20507	16.4979	0.835308	0.868066	1.42607	0.103913	1.15583	0.810499	637.298	7.01369	634.517	6.72882	624.6	18.0321	637.298	7.01369	102.033
GBDS-15-Spot 14	195.927	233957	15.4006	14.6241	0.780475	1.11041	1.21614	0.117825	0.932657	0.766901	718.036	6.33732	758.37	6.49733	879.182	16.1397	718.036	6.33732	81.6709
GBDS-15-Spot 115	1151.81	136203	11.616	14.7708	0.804606	1.11065	1.40753	0.119033	1.15488	0.820502	724.998	7.91921	758.489	7.52069	858.502	16.703	724.998	7.91921	84.4492
GBDS-15-Spot 188	268.103	164539	2.69041	14.8328	0.990957	1.1336	1.62625	0.122003	1.28945	0.7929	742.08	9.03857	769.468	8.77353	849.832	20.6073	742.08	9.03857	87.3208
GBDS-15-Spot 35	1042.59	213824	2.89662	14.636	0.813441	1.16057	1.38184	0.123248	1.11705	0.808377	749.234	7.90124	782.223	7.53699	877.513	16.8504	749.234	7.90124	85.3815
GBDS-15-Spot 57	119.461	58326.4	2.07629	14.4494	0.861857	1.24381	1.4452	0.130404	1.16009	0.80272	790.168	8.62716	820.606	8.13459	904.004	17.772	790.168	8.62716	87.4075
GBDS-15-Spot 221	1223.63	456928	8.38562	14.457	0.519951	1.2443	1.29476	0.130524	1.18577	0.915823	790.854	8.82531	820.828	7.28904	902.914	10.7347	790.854	8.82531	87.5891
GBDS-15-Spot 149	79.6327	18420.8	1.7632	14.1899	0.906298	1.33594	1.42177	0.137549	1.09547	0.770498	830.785	8.53899	861.468	8.2565	941.282	18.573	830.785	8.53899	88.2611
GBDS-15-Spot 152	893.774	211750	9.53175	13.9814	0.642804	1.39547	1.2565	0.141566	1.07963	0.859235	853.51	8.63081	887.018	7.43244	971.554	13.1104	971.554	13.1104	87.85
GBDS-15-Spot 238	1262.03	686339	42.8146	13.961	0.469152	1.62534	1.13629	0.164645	1.03491	0.910785	982.539	9.43142	980.057	7.14304	974.505	9.55043	974.505	9.55043	100.824
GBDS-15-Spot 201	239.511	162013	1.77748	13.9188	0.808855	1.47419	1.27513	0.148882	0.985753	0.773061	894.691	8.23479	919.848	7.71459	980.701	16.4565	980.701	16.4565	91.2298
GBDS-15-Spot 13	1602.52	1.12945e+06	93.6713	13.9136	0.708	1.64957	1.3955	0.166533	1.20256	0.861742	992.979	11.0669	989.387	8.82197	981.449	14.4184	981.449	14.4184	101.175
GBDS-15-Spot 278	896.506	252642	25.0737	13.9104	0.588703	1.65177	1.09874	0.166717	0.92772	0.844347	993.995	8.54573	990.231	6.94939	981.88	12.0062	981.88	12.0062	101.234
GBDS-15-Spot 184	1014.18	394585	64.8172	13.9031	0.694265	1.68084	1.2054	0.169561	0.985386	0.817476	1009.69	9.20932	1001.3	7.67407	982.959	14.1301	982.959	14.1301	102.719
GBDS-15-Spot 169	106.736	30988.2	3.62582	13.8987	0.720259	1.58982	1.21575	0.160328	0.979422	0.805613	958.601	8.72404	966.227	7.57809	983.628	14.6464	983.628	14.6464	97.4556
GBDS-15-Spot 19	1590.56	461088	8.70797	13.8847	0.616926	1.53333	1.08619	0.154476	0.89399	0.823049	926.003	7.71128	943.832	6.67555	985.66	12.542	985.66	12.542	93.9475
GBDS-15-Spot 228	224.337	137104	10.1141	13.8676	0.707742	1.519	1.54877	0.152843	1.37761	0.889482	916.881	11.7739	938.073	9.48331	988.198	14.3988	988.198	14.3988	92.7831
GBDS-15-Spot 49	32.1859	22169.3	0.919928	13.8419	0.860247	1.67875	1.59332	0.168605	1.34113	0.841723	1004.42	12.4736	1000.51	10.1391	991.926	17.4805	991.926	17.4805	101.259
GBDS-15-Spot 90	74.7082	67255.4	2.5374	13.8396	0.812141	1.51639	1.38436	0.152273	1.12111	0.809837	913.693	9.55065	937.023	8.47076	992.307	16.5135	992.307	16.5135	92.0777
GBDS-15-Spot 308	133.64	337428	1.17585	13.8343	0.860638	1.56858	1.35263	0.157454	1.04351	0.771468	942.61	9.15095	957.864	8.38752	993.077	17.4778	993.077	17.4778	94.9181
GBDS-15-Spot 27	245.666	214892	2.81534	13.8267	0.793335	1.58969	1.68428	0.159485	1.48574	0.88212	953.914	13.1739	966.176	10.4984	994.186	16.1259	994.186	16.1259	95.9492
GBDS-15-Spot 85	86.1217	35683.1	1.72696	13.8248	0.949432	1.65754	1.61921	0.166268	1.31165	0.810055	991.515	12.0545	992.434	10.2549	994.486	19.2898	994.486	19.2898	99.7013
GBDS-15-Spot 282	117.241	74838.9	2.84647	13.8183	0.922323	1.7476	1.43683	0.17522	1.10173	0.766777	1040.81	10.5891	1026.27	9.27976	995.4	18.7445	995.4	18.7445	104.562
GBDS-15-Spot 211	816.569	189131	2.91831	13.8018	0.682843	1.61084	1.19595	0.161315	0.98185	0.820977	964.081	8.79202	974.435	7.49246	997.83	13.8581	997.83	13.8581	96.6178
GBDS-15-Spot 198	275.085	62966.9	3.07053	13.8017	0.672485	1.60249	1.33652	0.160478	1.15501	0.864193	959.432	10.2964	971.18	8.35645	997.838	13.6616	997.838	13.6616	96.1511
GBDS-15-Spot 173	97.1101	146211	2.35552	13.8001	0.650535	1.6388	1.16801	0.164095	0.970075	0.830539	979.494	8.81517	985.25	7.3655	998.077	13.2032	998.077	13.2032	98.1381
GBDS-15-Spot 32	44.9111	20668.2	2.5406	13.7874	0.879738	1.75113	1.53444	0.175181	1.25721	0.819326	1040.6	12.0811	1027.58	9.91746	999.947	17.8645	999.947	17.8645	104.065
GBDS-15-Spot 290	22.1723	19568.8	2.23464	13.7819	0.954441	1.65706	1.37631	0.165705	0.991603	0.720478	988.404	9.08664	992.252	8.71553	1000.75	19.3615	1000.75	19.3615	98.7662
GBDS-15-Spot 119	106.193	175380	1.422	13.775	0.70348	1.55642	1.18412	0.155564	0.9525	0.804395	932.076	8.26604	953.048	7.32029	1001.77	14.283	1001.77	14.283	93.0429
GBDS-15-Spot 204	399.867	1.03959e+06	7.49816	13.7594	0.883554	1.64612	1.42335	0.164342	1.11592	0.784005	980.861	10.1536	988.065	8.99097	1004.08	17.9322	1004.08	17.9322	97.6875
GBDS-15-Spot 50	104.71	65304	1.83907	13.7464	0.657527	1.63917	1.28412	0.163493	1.103	0.858958	976.161	9.99153	985.394	8.09844	1006	13.3287	1006	13.3287	97.0342
GBDS-15-Spot 207	24.4214	23148.7	1.37371	13.7389	1.21782	1.66254	1.67976	0.165734	1.15694	0.688754	988.562	10.6033	994.345	10.6505	1007.1	24.692	1007.1	24.692	98.1589
GBDS-15-Spot 114	532.628	1.18336e+06	10.4924	13.7358	0.681439	1.59159	1.54271	0.158625	1.38405	0.897155	949.134	12.2152	966.921	9.62039	1007.56	13.8041	1007.56	13.8041	94.2012
GBDS-15-Spot 51	177.66	70908.2	8.82135	13.7305	0.947282	1.58912	1.83172	0.158318	1.56776	0.855892	947.422	13.8134	965.951	11.4159	1008.34	19.1944	1008.34	19.1944	93.9587
GBDS-15-Spot 75	358.121	310863	5.25702	13.7203	0.758812	1.6055	1.19329	0.159832	0.920942	0.77177	955.841	8.18122	972.357	7.46623	1009.85	15.3715	1009.85	15.3715	94.6521
GBDS-15-Spot 113	26.0616	68553.8	3.57638	13.7175	0.973627	1.72237	1.45573	0.171432	1.08222	0.74342	1020	10.2096	1016.91	9.35194	1010.26	19.7259	1010.26	19.7259	100.964
GBDS-15-Spot 186	162.784	142399	3.6553	13.7171	0.914193	1.65589	1.49514	0.16481	1.18308	0.791287	983.449	10.791	991.806	9.46553	1010.32	18.5364	1010.32	18.5364	97.3405
GBDS-15-Spot 42	119.652	24162.5	2.69112	13.7071	0.717515	1.62622	1.26397	0.161738	1.04057	0.823257	966.426	9.33883	980.398	7.94735	1011.8	14.5464	1011.8	14.5464	95.5153
GBDS-15-Spot 132	80.5311	19977.6	4.25279	13.6914	0.765677	1.79527	1.38738	0.178348	1.15696	0.833918	1057.94	11.2884	1043.74	9.04779	1014.11	15.5174	1014.11	15.5174	104.322
GBDS-15-Spot 23	363.096	921637	1.27981	13.6813	0.822106	1.65283	1.26728	0.164075	0.964443	0.761031	979.384	8.76308	990.636	8.01737	1015.62	16.6563	1015.62	16.6563	96.432
GBDS-15-Spot 252	339.325	285618	143.785	13.6785	0.602455	1.65876	1.41755	0.16463	1.28316	0.905195	982.456	11.6929	992.9	8.98017	1016.03	12.2054	1016.03	12.2054	96.6956
GBDS-15-Spot 232	70.9895	61230.7	3.2462	13.6546	0.862557	1.6297	1.56168	0.161464	1.30186	0.833629	964.909	11.6669	981.745	9.82739	1019.57	17.4653	1019.57	17.4653	94.639
GBDS-15-Spot 222	110.5	36452.7	3.71216	13.6462	0.847317	1.66542	1.61488	0.164901	1.37474	0.851292	983.957	12.5451	995.444	10.2458	1020.82	17.154	1020.82	17.154	96.3891
GBDS-15-Spot 273	130.499	967725	2.5727	13.6453	0.758538	1.8055	1.57895	0.178759	1.38481	0.877045	1060.19	13.5379	1047.45	10.3181	1020.96	15.3561	1020.96	15.3561	103.843
GBDS-15-Spot 22	51.6969	31284.1	5.31825	13.637	0.893373	1.66565	1.46935	0.164813	1.16656	0.793931	983.469	10.6405	995.53	9.32281	1022.18	18.0816	1022.18	18.0816	96.213
GBDS-15-Spot 285	54.9048	224038	2.25921	13.6259	0.727926	1.64517	1.45524	0.162653	1.26009	0.865903	971.502	11.364	987.697	9.19034	1023.84	14.7298	1023.84	14.7298	94.8884
GBDS-15-Spot 189	29.5993	28404.5	2.04905	13.6246	0.825947	1.65788	1.29295	0.163894	0.994746	0.769364	978.382	9.02986	992.565	8.18912	1024.02	16.7124	1024.02	16.7124	95.5428
GBDS-15-Spot 124	97.44	59349.4	1.24622	13.6245	0.724357	1.7766	1.39934	0.17563	1.19728	0.855598	1043.06	11.5303	1036.94	9.09164	1024.03	14.6573	1024.03	14.6573	101.858
GBDS-15-Spot 191	168.102	173849	1.87478	13.6187	0.541648	1.7556	1.04709	0.173481	0.896108	0.85581	1031.26	8.53991	1029.23	6.77375	1024.9	10.9593	1024.9	10.9593	100.621
GBDS-15-Spot 268	158.079	62148.5	2.39956	13.6114	0.711158	1.71779	1.34719	0.169653	1.14419	0.849317	1010.2	10.6985	1015.2	8.64617	1025.99	14.3858	1025.99	14.3858	98.4615
GBDS-15-Spot 312	563.598	379427	2.65714	13.6008	0.699404	1.67433	1.35024	0.165231	1.15498	0.85539	985.784	10.5578	998.829	8.58374	1027.56	14.1441	1027.56	14.1441	95.9345
GBDS-15-Spot 89	221.208	165393	2.06532	13.5961	0.689309	1.76862	1.06925	0.174476	0.81741	0.764467	1036.73	7.828	1034.02	6.93569	1028.26	13.9388	1028.26	13.9388	100.823
GBDS-15-Spot 77	566.768	150958	7.35086	13.5886	0.646068	1.42364	1.41122	0.140367	1.25465	0.889051	846.735	9.95541	898.891	8.41719	1029.38	13.0618	1029.38	13.0618	82.2569
GBDS-15-Spot 246	191.753	68495.1	2.3198	13.583	0.63343	1.74219	1.24668	0.171703	1.07377	0.861302	1021.49	10.1435	1024.27	8.0425	1030.21	12.8242	1030.21	12.8242	99.1529
GBDS-15-Spot 59	162.438	92896.8	2.13444	13.5777	0.615357	1.74197	1.19077	0.171615	1.01944	0.856123	1021	9.62613	1024.19	7.68146	1031	12.4577	1031	12.4577	99.0304
GBDS-15-Spot 261	61.1187	160652	2.82072	13.5664	0.942097	1.61849	1.24226	0.159317	0.809731	0.651821	952.981	7.17331	977.404	7.79668	1032.67	19.057	1032.67	19.057	92.2827
GBDS-15-Spot 46	217.708	138185	1.35008	13.561	0.637889	1.69727	1.21379	0.167005	1.03266	0.850773	995.586	9.5265	1007.5	7.7555	1033.49	12.9079	1033.49	12.9079	96.3322
GBDS-15-Spot 53	135.899	88482.9	2.51114	13.5558	0.763534	1.8082	1.54745	0.177852	1.34596	0.869795	1055.23	13.1015	1048.43	10.1177	1034.26	15.4453	1034.26	15.4453	102.027
GBDS-15-Spot 61	115.269	44440.3	3.26312	13.5258	0.823673	1.72898	1.31486	0.169684	1.0249	0.779474	1010.37	9.58457	1019.37	8.45881	1038.73	16.6488	1038.73	16.6488	97.2695
GBDS-15-Spot 288	386.921	294601	1.28229	13.5173	0.672111	1.73292	1.22563	0.169965	1.02491	0.83623	1011.92	9.59821	1020.84	7.89134	1040	13.5858	1040	13.5858	97.2999
GBDS-15-Spot 76	306.414	114709	5.25309	13.5113	0.579548	1.6745	1.11867	0.164161	0.956842	0.855339	979.86	8.69793	998.897	7.11184	1040.9	11.7169	1040.9	11.7169	94.1355
GBDS-15-Spot 106	129.282	339718	3.02549	13.5057	0.768801	1.79444	1.36261	0.175847	1.12501	0.825629	1044.25	10.8457	1043.44	8.88476	1041.73	15.534	1041.73	15.534	100.241
GBDS-15-Spot 269	110.554	67804.1	1.83355	13.5052	0.717967	1.80579	1.03922	0.176952	0.751339	0.722981	1050.3	7.28201	1047.55	6.79137	1041.81	14.5076	1041.81	14.5076	100.815
GBDS-15-Spot 260	23.9082	35184.6	2.45773	13.4827	0.938034	1.71641	1.24007	0.167913	0.811092	0.654068	1000.6	7.51731	1014.68	7.9563	1045.21	18.9395	1045.21	18.9395	95.732
GBDS-15-Spot 72	154.76	44828.7	2.29969	13.4826	0.605053	1.79024	1.35359	0.175135	1.21084	0.894535	1040.34	11.6329	1041.91	8.81858	1045.23	12.2233	1045.23	12.2233	99.5317
GBDS-15-Spot 40	180.219	63793.9	1.41796	13.4823	0.677706	1.78977	1.38831	0.175085	1.21166	0.872758	1040.06	11.638	1041.74	9.0439	1045.28	13.6875	1045.28	13.6875	99.5015
GBDS-15-Spot 81	153.977	184430	1.28402	13.4766	0.802364	1.80409	1.27022	0.176411	0.98472	0.775235	1047.34	9.51916	1046.94	8.29823	1046.13	16.1995	1046.13	16.1995	100.116
GBDS-15-Spot 199	69.8412	27404	4.05212	13.4751	1.01755	1.71135	1.72698	0.167325	1.39537	0.807982	997.353	12.8937	1012.79	11.0685	1046.35	20.5393	1046.35	20.5393	95.3178
GBDS-15-Spot 254	192.735	226513	0.972998	13.4745	0.551306	1.80444	1.13792	0.176418	0.995454	0.8748	1047.37	9.62321	1047.07	7.43441	1046.44	11.1376	1046.44	11.1376	100.089
GBDS-15-Spot 234	334.26	1.35223e+06	5.39421	13.4637	0.688248	1.74149	1.3637	0.170127	1.17728	0.863299	1012.81	11.0341	1024.02	8.79616	1048.06	13.8951	1048.06	13.8951	96.6363
GBDS-15-Spot 4	156.024	87784.1	2.81297	13.4598	0.542618	1.73751	1.36235	0.169689	1.24963	0.917258	1010.4	11.6865	1022.54	8.78015	1048.64	10.958	1048.64	10.958	96.3537
GBDS-15-Spot 175	42.4404	974168	2.38206	13.4592	0.691331	1.72525	1.40759	0.168485	1.22612	0.871078	1003.76	11.397	1017.98	9.04823	1048.73	13.9567	1048.73	13.9567	95.7118
GBDS-15-Spot 45	48.8149	7.98335e+06	2.09611	13.4455	1.04985	1.80306	1.63617	0.175903	1.25494	0.766996	1044.56	12.1016	1046.57	10.6869	1050.79	21.1766	1050.79	21.1766	99.4068
GBDS-15-Spot 44	120.666	283857	2.69757	13.4398	0.73276	1.77904	1.28197	0.173486	1.0519	0.820539	1031.29	10.0249	1037.83	8.3331	1051.64	14.7846	1051.64	14.7846	98.0646
GBDS-15-Spot 79	158.046	155412	3.60098	13.4311	0.756661	1.83534	1.30038	0.178861	1.05758	0.813279	1060.75	10.3439	1058.19	8.54718	1052.94	15.2624	1052.94	15.2624	100.741
GBDS-15-Spot 284	203.333	337466	2.80217	13.4206	0.476456	1.78504	0.989332	0.173823	0.867045	0.876395	1033.14	8.27683	1040.02	6.43864	1054.52	9.597	1054.52	9.597	97.9722
GBDS-15-Spot 64	51.2569	24315.1	1.67752	13.4191	1.07171	1.73122	1.87807	0.168563	1.54226	0.821195	1004.19	14.3412	1020.2	12.0881	1054.74	21.6045	1054.74	21.6045	95.2068
GBDS-15-Spot 209	127.247	428515	5.51622	13.4164	0.825691	1.61508	1.81231	0.157223	1.61329	0.890183	941.326	14.1296	976.082	11.3655	1055.16	16.6478	1055.16	16.6478	89.212
GBDS-15-Spot 255	67.6733	74176.8	0.859261	13.3914	0.765497	1.74849	1.39463	0.169894	1.16576	0.835894	1011.53	10.9134	1026.6	9.00883	1058.9	15.4075	1058.9	15.4075	95.5264
GBDS-15-Spot 3	93.0646	66623.7	1.07322	13.3805	0.731064	1.77678	1.21493	0.172502	0.970357	0.798696	1025.88	9.20302	1037	7.89371	1060.54	14.7047	1060.54	14.7047	96.7315
GBDS-15-Spot 172	623.449	24753.9	2.03402	13.3615	0.726315	1.63989	1.42664	0.158986	1.22791	0.860702	951.138	10.8584	985.669	8.99878	1063.4	14.6102	1063.4	14.6102	89.4432
GBDS-15-Spot 87	132.251	151726	1.35224	13.3309	0.815425	1.84408	1.2768	0.178372	0.982492	0.769498	1058.07	9.58718	1061.32	8.40619	1068.02	16.3797	1068.02	16.3797	99.0691
GBDS-15-Spot 291	335.88	255960	2.45685	13.3167	0.500905	1.7444	1.15757	0.168551	1.04358	0.901528	1004.12	9.7035	1025.09	7.47109	1070.15	10.0478	1070.15	10.0478	93.8299
GBDS-15-Spot 24	92.691	104759	1.25711	13.3051	0.647486	1.8592	0.931199	0.179486	0.669248	0.718695	1064.17	6.56514	1066.7	6.14836	1071.91	12.9932	1071.91	12.9932	99.2774
GBDS-15-Spot 245	891.64	2.15347e+06	15.6	13.2959	0.770031	1.85847	1.49903	0.179292	1.28614	0.857978	1063.11	12.6051	1066.44	9.89637	1073.29	15.4467	1073.29	15.4467	99.0511
GBDS-15-Spot 142	204.282	210401	2.15354	13.2935	0.804856	1.91284	1.56682	0.184504	1.3443	0.857978	1091.53	13.4984	1085.57	10.4479	1073.66	16.1451	1073.66	16.1451	101.664
GBDS-15-Spot 12	52.3175	293884	5.18396	13.2786	0.827646	1.89818	1.42208	0.182884	1.15642	0.813191	1082.71	11.5257	1080.45	9.45755	1075.89	16.6163	1075.89	16.6163	100.634
GBDS-15-Spot 270	220.898	365796	2.38483	13.268	0.870281	1.88814	1.59052	0.181772	1.33131	0.837024	1076.65	13.2005	1076.93	10.5585	1077.47	17.4597	1077.47	17.4597	99.9232
GBDS-15-Spot 237	1305.46	82158.4	8.36936	13.2651	0.813979	1.56032	1.38362	0.150181	1.11886	0.808646	901.976	9.41764	954.596	8.56204	1077.91	16.3315	1077.91	16.3315	83.6783
GBDS-15-Spot 135	282.932	77071	49.9698	13.2627	0.80003	1.8365	1.41064	0.17673	1.16183	0.823622	1049.09	11.2486	1058.61	9.27399	1078.31	16.0396	1078.31	16.0396	97.2897
GBDS-15-Spot 182	275.374	105147	2.6781	13.2086	0.531288	1.87215	1.07918	0.179426	0.939337	0.870421	1063.84	9.21201	1071.29	7.14271	1086.49	10.6433	1086.49	10.6433	97.9147
GBDS-15-Spot 257	324.918	152993	3.52834	13.2061	0.68831	1.86373	1.27078	0.178584	1.06822	0.840607	1059.24	10.4343	1068.31	8.39768	1086.89	13.7862	1086.89	13.7862	97.4553
GBDS-15-Spot 104	305.934	39735.1	11.3822	13.2001	0.719612	1.52153	1.60288	0.145728	1.43227	0.893558	876.973	11.7437	939.091	9.82113	1087.77	14.4099	1087.77	14.4099	80.6211
GBDS-15-Spot 281	476.52	1.64923e+07	4.79908	13.1461	0.716944	1.64667	1.36418	0.157069	1.1606	0.850763	940.466	10.1562	988.273	8.61825	1096.02	14.3509	1096.02	14.3509	85.8077
GBDS-15-Spot 30	47.5098	216812	0.630978	13.1336	0.954816	1.79531	1.42385	0.171085	1.05625	0.74183	1018.09	9.94741	1043.76	9.28572	1097.91	19.1101	1097.91	19.1101	92.7297
GBDS-15-Spot 20	710.041	3.16889e+06	8.68952	13.1165	0.794367	1.84435	1.47547	0.175529	1.24338	0.842701	1042.5	11.9684	1061.42	9.7148	1100.5	15.909	1100.5	15.909	94.7297
GBDS-15-Spot 220	69.428	17541.8	2.57365	13.0883	0.690811	1.93839	1.2768	0.184083	1.07378	0.840992	1089.24	10.7613	1094.44	8.55256	1104.82	13.828	1104.82	13.828	98.59
GBDS-15-Spot 66	518.76	193539	2.12918	13.0866	0.921476	1.55209	1.49161	0.147378	1.17294	0.786358	886.248	9.71228	951.326	9.21127	1105.06	18.4302	1105.06	18.4302	80.199
GBDS-15-Spot 307	426.212	6.08273e+06	9.12808	13.0826	0.622366	1.88151	1.29854	0.178603	1.13968	0.877661	1059.34	11.1333	1074.59	8.60959	1105.66	12.4397	1105.66	12.4397	95.8103
GBDS-15-Spot 68	230.07	146268	14.5562	13.0497	0.817147	1.95684	1.35725	0.185287	1.08369	0.798449	1095.79	10.9206	1100.8	9.12069	1110.68	16.3364	1110.68	16.3364	98.6594
GBDS-15-Spot 243	164.681	257174	1.63133	13.0281	0.563113	1.7881	1.27164	0.169029	1.14016	0.896608	1006.76	10.6272	1041.13	8.28108	1114.04	11.2423	1114.04	11.2423	90.3697
GBDS-15-Spot 183	25.4568	10066.3	1.09542	13.0247	0.913669	2.04781	1.44361	0.19353	1.11769	0.77423	1140.47	11.683	1131.57	9.84908	1114.55	18.2275	1114.55	18.2275	102.325
GBDS-15-Spot 264	449.058	324754	11.4301	13.0135	0.512011	1.95108	1.34065	0.184228	1.23902	0.924198	1090.03	12.4256	1098.82	9.00015	1116.28	10.2282	1116.28	10.2282	97.6489
GBDS-15-Spot 156	1022.88	5.20982e+08	1.80815	13.0132	0.587162	2.05971	1.10466	0.194481	0.935685	0.847037	1145.6	9.82079	1135.52	7.55076	1116.32	11.7295	1116.32	11.7295	102.623
GBDS-15-Spot 98	1497.29	4.23135e+06	17.8413	12.9794	0.624863	1.94396	1.12643	0.183076	0.937229	0.832032	1083.75	9.34936	1096.36	7.55264	1121.47	12.48	1121.47	12.48	96.6372
GBDS-15-Spot 226	220.282	2.60786e+06	3.29093	12.975	0.692795	2.05008	1.37602	0.193004	1.1889	0.864009	1137.63	12.399	1132.32	9.39134	1122.18	13.832	1122.18	13.832	101.377
GBDS-15-Spot 193	125.962	321497	0.839002	12.9638	0.651335	1.94058	1.2293	0.182537	1.04257	0.848098	1080.82	10.3743	1095.2	8.23754	1123.88	12.99	1123.88	12.99	96.1689
GBDS-15-Spot 117	293.422	1.48471e+06	3.97776	12.9565	0.805619	1.80045	1.33318	0.16926	1.06223	0.796768	1008.03	9.91247	1045.62	8.70325	1125	16.0646	1125	16.0646	89.6029
GBDS-15-Spot 136	285.715	633028	13.0412	12.9548	0.693412	2.02914	1.26833	0.190735	1.062	0.837319	1125.35	10.9662	1125.33	8.62709	1125.26	13.839	1125.26	13.839	100.008
GBDS-15-Spot 185	108.634	70541.1	2.22268	12.9524	0.763405	1.82989	1.11149	0.171975	0.807849	0.726817	1022.98	7.64178	1056.24	7.2979	1125.66	15.2286	1125.66	15.2286	90.8783
GBDS-15-Spot 315	44.8617	96678.1	3.15152	12.9514	0.717826	2.05714	1.78032	0.193316	1.62919	0.915112	1139.31	17.0139	1134.67	12.1646	1125.82	14.3168	1125.82	14.3168	101.199
GBDS-15-Spot 215	258.119	214292	14.3248	12.9323	0.747603	1.9431	1.61641	0.182331	1.43313	0.886615	1079.69	14.2471	1096.07	10.8365	1128.76	14.8926	1128.76	14.8926	95.6534
GBDS-15-Spot 187	200.188	81661.5	2.71359	12.9278	0.626158	1.98719	1.22398	0.186403	1.05169	0.859239	1101.86	10.6519	1111.17	8.26783	1129.42	12.4532	1129.42	12.4532	97.5595
GBDS-15-Spot 43	93.1768	63719.6	3.08254	12.9009	0.662407	2.09922	1.19776	0.196501	0.99792	0.833156	1156.5	10.5649	1148.55	8.23786	1133.6	13.1772	1133.6	13.1772	102.02
GBDS-15-Spot 202	55.643	20099.9	5.65681	12.8849	0.716871	2.00899	1.3862	0.187822	1.18644	0.855896	1109.57	12.0938	1118.55	9.39779	1136.07	14.2654	1136.07	14.2654	97.6671
GBDS-15-Spot 262	69.5997	26899.6	5.75424	12.8761	0.677303	2.14028	1.23714	0.199961	1.03527	0.836823	1175.11	11.1211	1161.92	8.56174	1137.42	13.4667	1137.42	13.4667	103.313
GBDS-15-Spot 71	45.3032	122380	1.58208	12.8749	0.857407	2.11302	1.32009	0.197395	1.00374	0.760356	1161.31	10.6669	1153.06	9.09843	1137.57	17.0515	1137.57	17.0515	102.087
GBDS-15-Spot 311	165.033	52431.1	3.6696	12.8498	0.966878	2.1146	1.84479	0.197157	1.57111	0.851649	1160.03	16.6797	1153.58	12.7182	1141.46	19.2227	1141.46	19.2227	101.627
GBDS-15-Spot 229	99.484	652292	2.71005	12.8431	0.605153	1.99705	1.19289	0.1861	1.028	0.86177	1100.22	10.3977	1114.51	8.07114	1142.53	12.022	1142.53	12.022	96.2968
GBDS-15-Spot 163	290.739	614846	2.84519	12.8404	0.732755	2.08686	1.27722	0.194428	1.04612	0.819059	1145.32	10.9774	1144.49	8.76767	1142.94	14.5656	1142.94	14.5656	100.208
GBDS-15-Spot 15	359.743	1.96343e+06	3.25101	12.8176	0.576127	2.07404	1.28455	0.19289	1.14811	0.89378	1137.01	11.9677	1140.27	8.80035	1146.48	11.4273	1146.48	11.4273	99.1739
GBDS-15-Spot 70	33.6985	527375	5.27784	12.8152	0.763967	2.06257	1.54969	0.191788	1.34829	0.870041	1131.05	13.9871	1136.47	10.5977	1146.82	15.1786	1146.82	15.1786	98.6252
GBDS-15-Spot 137	331.574	2.06595e+06	2.87333	12.8104	0.755503	2.12078	1.46267	0.197127	1.25245	0.856274	1159.87	13.2949	1155.59	10.0931	1147.59	15.0074	1147.59	15.0074	101.069
GBDS-15-Spot 313	33.7966	75081.7	2.9035	12.7849	0.883359	2.03771	1.37969	0.189029	1.05983	0.76816	1116.11	10.8615	1128.2	9.39769	1151.52	17.5377	1151.52	17.5377	96.9251
GBDS-15-Spot 242	41.8029	14117.9	2.59755	12.7733	0.658995	2.16606	1.25573	0.200752	1.06891	0.85123	1179.36	11.5204	1170.22	8.72342	1153.32	13.0715	1153.32	13.0715	102.258
GBDS-15-Spot 138	257.248	225766	4.09407	12.7569	0.602222	2.13286	1.31471	0.197421	1.16868	0.88892	1161.45	12.4211	1159.51	9.08854	1155.87	11.9404	1155.87	11.9404	100.483
GBDS-15-Spot 212	134.301	75223.6	3.35114	12.7464	0.489731	2.13565	1.47957	0.197517	1.39617	0.943632	1161.97	14.845	1160.42	10.2325	1157.5	9.7134	1157.5	9.7134	100.385
GBDS-15-Spot 225	338.819	9.30693e+07	3.32567	12.7311	0.88823	1.96223	1.43979	0.18126	1.13316	0.787029	1073.85	11.2089	1102.65	9.68441	1159.89	17.632	1159.89	17.632	92.5828
GBDS-15-Spot 208	88.5729	93194.7	2.02196	12.7157	0.687754	2.09557	1.26891	0.193344	1.06636	0.840376	1139.47	11.1375	1147.35	8.72235	1162.28	13.6509	1162.28	13.6509	98.0374
GBDS-15-Spot 111	525.286	230530	5.80365	12.7048	0.594725	1.78883	1.30279	0.164902	1.15912	0.889722	983.959	10.5775	1041.4	8.48516	1163.98	11.8047	1163.98	11.8047	84.5342
GBDS-15-Spot 154	381.424	336281	5.20984	12.7002	0.597309	2.14239	1.22316	0.197422	1.0674	0.872657	1161.46	11.3447	1162.6	8.46761	1164.7	11.8545	1164.7	11.8545	99.721
GBDS-15-Spot 314	227.818	4.55118e+06	2.45602	12.6835	0.602225	2.02551	1.17756	0.186406	1.01191	0.859331	1101.88	10.2492	1124.11	8.00491	1167.31	11.9467	1167.31	11.9467	94.3947
GBDS-15-Spot 150	39.6671	30490	2.23371	12.682	0.936164	2.02225	1.65379	0.186085	1.36331	0.824355	1100.13	13.7882	1123.01	11.2365	1167.53	18.5615	1167.53	18.5615	94.2271
GBDS-15-Spot 1	59.6291	69939.5	1.18463	12.6784	0.761801	2.13203	1.34124	0.196131	1.1039	0.823042	1154.5	11.6685	1159.24	9.2708	1168.14	15.1057	1168.14	15.1057	98.8325
GBDS-15-Spot 302	165.146	285155	3.42167	12.6733	0.616642	2.18142	1.36842	0.200594	1.22161	0.892715	1178.51	13.1575	1175.13	9.52756	1168.94	12.2299	1168.94	12.2299	100.819
GBDS-15-Spot 95	118.927	70367.4	3.04573	12.6666	0.651516	2.18495	1.02047	0.200811	0.785418	0.769665	1179.68	8.46706	1176.26	7.10845	1169.98	12.9185	1169.98	12.9185	100.828
GBDS-15-Spot 109	53.0986	53062.1	2.44813	12.6587	0.774551	2.16533	1.18717	0.198885	0.899687	0.757844	1169.33	9.62133	1169.98	8.24625	1171.21	15.351	1171.21	15.351	99.8391
GBDS-15-Spot 9	95.0444	77447.8	2.24774	12.6547	0.719902	2.11411	1.17695	0.194119	0.931099	0.791114	1143.65	9.75743	1153.42	8.11316	1171.84	14.2684	1171.84	14.2684	97.5943
GBDS-15-Spot 17	61.3891	99617.4	0.522608	12.6506	0.889426	2.10638	1.82077	0.193346	1.58875	0.87257	1139.48	16.5937	1150.89	12.5369	1172.48	17.6052	1172.48	17.6052	97.1849
GBDS-15-Spot 33	104.68	106677	3.36987	12.6405	0.784939	2.17973	1.37828	0.19992	1.13293	0.821988	1174.89	12.1682	1174.59	9.59386	1174.06	15.537	1174.06	15.537	100.071
GBDS-15-Spot 287	509.292	565837	4.96958	12.6309	0.692277	2.09133	1.43938	0.191666	1.26196	0.876744	1130.39	13.0845	1145.96	9.88769	1175.57	13.6972	1175.57	13.6972	96.157
GBDS-15-Spot 178	206.905	109722	3.50763	12.6188	0.739549	2.206	1.36225	0.20198	1.14403	0.839806	1185.95	12.3928	1182.95	9.51793	1177.47	14.6343	1177.47	14.6343	100.72
GBDS-15-Spot 145	90.9658	258958	2.36947	12.6099	0.734665	2.16397	1.37054	0.197994	1.157	0.844193	1164.54	12.3268	1169.55	9.51819	1178.86	14.5281	1178.86	14.5281	98.7853
GBDS-15-Spot 60	483.411	283109	2.26847	12.6045	0.919904	2.16046	1.54738	0.197588	1.24425	0.804103	1162.35	13.2337	1168.42	10.7409	1179.71	18.2073	1179.71	18.2073	98.5284
GBDS-15-Spot 131	276.901	261671	2.04312	12.6044	0.634191	1.97305	1.17224	0.180447	0.985879	0.841019	1069.42	9.71505	1106.35	7.89938	1179.72	12.5495	1179.72	12.5495	90.6498
GBDS-15-Spot 194	137.453	79789.9	0.928835	12.6042	0.509015	2.09715	1.17146	0.191793	1.0551	0.900666	1131.08	10.9457	1147.87	8.05442	1179.75	10.0451	1179.75	10.0451	95.8745
GBDS-15-Spot 250	172.55	89318	7.35976	12.6033	0.695708	2.30816	1.72704	0.211076	1.58071	0.915273	1234.55	17.7598	1214.8	12.2358	1179.89	13.7547	1179.89	13.7547	104.632
GBDS-15-Spot 181	405.715	460231	1.36453	12.5943	0.772708	2.00201	1.36895	0.182948	1.13002	0.825464	1083.06	11.2659	1116.19	9.27006	1181.31	15.2737	1181.31	15.2737	91.6826
GBDS-15-Spot 216	346.43	606690	2.79136	12.5697	0.839364	2.13405	1.43888	0.194632	1.16869	0.812224	1146.42	12.2744	1159.9	9.94871	1185.18	16.5643	1185.18	16.5643	96.7298
GBDS-15-Spot 153	439.7	153853	4.47281	12.5571	0.652558	2.00974	1.32095	0.183112	1.14851	0.869458	1083.95	11.4589	1118.8	8.9565	1187.15	12.8787	1187.15	12.8787	91.3071
GBDS-15-Spot 203	189.68	387034	3.35533	12.5564	0.713283	2.10483	1.32753	0.191765	1.11962	0.84339	1130.93	11.6136	1150.39	9.13826	1187.26	14.0695	1187.26	14.0695	95.2552
GBDS-15-Spot 110	61.449	44451.6	3.11313	12.5509	0.746901	2.22168	1.35567	0.202321	1.13137	0.834542	1187.78	12.2728	1187.9	9.49285	1188.11	14.7319	1188.11	14.7319	99.9724
GBDS-15-Spot 129	150.74	112678	2.20583	12.5507	0.601717	2.26996	1.13733	0.206716	0.965119	0.848584	1211.3	10.6578	1203	8.01679	1188.12	11.8736	1188.12	11.8736	101.951
GBDS-15-Spot 265	45.4121	45155	2.53007	12.5475	0.988993	2.06633	2.42225	0.188124	2.21115	0.91285	1111.2	22.5694	1137.72	16.5756	1188.63	19.5121	1188.63	19.5121	93.4863
GBDS-15-Spot 2	597.639	423802	3.59356	12.5473	0.795555	2.01416	1.23813	0.183371	0.948711	0.766247	1085.37	9.47682	1120.29	8.40104	1188.7	15.7097	1188.7	15.7097	91.3071
GBDS-15-Spot 101	139.388	447359	3.35768	12.5469	0.805874	2.22902	1.41827	0.202925	1.16708	0.822885	1191.02	12.6916	1190.21	9.94138	1188.76	15.9133	1188.76	15.9133	100.189
GBDS-15-Spot 63	75.3152	72124.5	1.82186	12.5449	0.675265	2.18302	1.35384	0.198706	1.17341	0.866729	1168.37	12.5391	1175.64	9.42817	1189.06	13.3151	1189.06	13.3151	98.2594
GBDS-15-Spot 25	101.447	118728	2.81128	12.5253	0.951255	2.21767	1.41479	0.201545	1.04726	0.740221	1183.61	11.3241	1186.64	9.90128	1192.15	18.765	1192.15	18.765	99.2843
GBDS-15-Spot 274	258.597	557348	1.84295	12.5176	0.622805	2.17807	1.18268	0.197825	1.00541	0.85011	1163.63	10.704	1174.06	8.23027	1193.33	12.2898	1193.33	12.2898	97.5106
GBDS-15-Spot 299	104.796	141199	1.9962	12.5142	0.596918	2.16067	1.12214	0.196191	0.950208	0.846779	1154.83	10.0465	1168.49	7.78926	1193.86	11.7769	1193.86	11.7769	96.7302
GBDS-15-Spot 83	75.3969	23619.2	4.71767	12.5125	0.856666	2.2447	1.28496	0.203793	0.957736	0.74534	1195.66	10.4521	1195.13	9.02643	1194.14	16.8919	1194.14	16.8919	100.128
GBDS-15-Spot 219	105.907	140329	3.92621	12.4687	0.739782	2.12189	1.43369	0.191969	1.22809	0.85659	1132.03	12.7502	1155.95	9.89477	1201.06	14.577	1201.06	14.577	94.2533
GBDS-15-Spot 133	408.507	238345	2.73991	12.3975	0.776427	2.16224	1.52456	0.194503	1.31203	0.860601	1145.72	13.7722	1168.99	10.5852	1212.33	15.2896	1212.33	15.2896	94.5056
GBDS-15-Spot 112	97.3293	37327.2	5.20517	12.3717	0.768577	2.40075	1.22487	0.215508	0.953724	0.778634	1258.1	10.9005	1242.83	8.78016	1216.47	15.1338	1216.47	15.1338	103.422
GBDS-15-Spot 259	134.27	192398	13.35	12.3692	0.694849	2.25932	1.31879	0.202771	1.12089	0.849938	1190.19	12.1816	1199.69	9.28258	1216.83	13.6831	1216.83	13.6831	97.8106
GBDS-15-Spot 247	100.921	56615.5	4.33895	12.3569	0.662352	2.28974	1.18258	0.205298	0.979683	0.828431	1203.72	10.7571	1209.13	8.35784	1218.82	13.0231	1218.82	13.0231	98.7613
GBDS-15-Spot 235	71.7924	70023.4	3.30644	12.3482	0.765723	2.33492	1.38735	0.209201	1.15689	0.833889	1224.56	12.9026	1222.98	9.86315	1220.17	15.0512	1220.17	15.0512	100.36
GBDS-15-Spot 86	252.469	96908.8	1.43291	12.3283	0.758702	2.34645	1.36922	0.209895	1.13979	0.832441	1228.26	12.7467	1226.48	9.7486	1223.34	14.9073	1223.34	14.9073	100.402
GBDS-15-Spot 34	123.307	91473.8	2.82171	12.3143	0.620526	2.35627	1.31827	0.210534	1.16309	0.882286	1231.66	13.04	1229.46	9.39752	1225.57	12.1763	1225.57	12.1763	100.498
GBDS-15-Spot 167	146.374	212995	1.69123	12.296	1.02453	2.18155	1.56167	0.194633	1.17862	0.75472	1146.42	12.3787	1175.17	10.8733	1228.53	20.1209	1228.53	20.1209	93.3165
GBDS-15-Spot 127	91.3694	344551	3.37767	12.2236	0.645818	2.45833	1.28607	0.218036	1.11216	0.864773	1271.49	12.8337	1259.87	9.28284	1240.11	12.658	1240.11	12.658	102.53
GBDS-15-Spot 210	113.433	19565.7	2.50112	12.2131	1.01397	2.07008	1.55082	0.183443	1.17341	0.75664	1085.75	11.7253	1138.96	10.618	1241.76	19.8774	1241.76	19.8774	87.4364
GBDS-15-Spot 10	258.177	781993	1.80039	12.1676	0.665518	2.39416	1.24871	0.211371	1.05658	0.846137	1236.12	11.8847	1240.86	8.94382	1249.08	13.0249	1249.08	13.0249	98.9621
GBDS-15-Spot 6	110.67	82557.3	2.2064	12.1633	0.889906	2.41591	1.7679	0.213217	1.52759	0.864072	1245.93	17.3065	1247.34	12.6965	1249.76	17.4178	1249.76	17.4178	99.6937
GBDS-15-Spot 244	19.5765	42196.8	2.54844	12.1378	1.00599	2.31486	1.56549	0.20387	1.19947	0.766196	1196.08	13.0943	1216.85	11.1008	1253.9	19.6611	1253.9	19.6611	95.3882
GBDS-15-Spot 41	189.751	97744.8	3.90325	12.1352	0.729593	2.49871	1.51267	0.220015	1.32509	0.875995	1281.95	15.4046	1271.66	10.9698	1254.32	14.2722	1254.32	14.2722	102.203
GBDS-15-Spot 236	709.858	22296.4	6.04622	12.0858	1.07941	2.03006	1.56329	0.178022	1.13083	0.723363	1056.16	11.0163	1125.64	10.6352	1262.27	21.0821	1262.27	21.0821	83.6714
GBDS-15-Spot 205	247.121	259066	2.36704	12.035	0.688593	2.3673	1.48166	0.206723	1.31193	0.885446	1211.34	14.4881	1232.79	10.5771	1270.52	13.4283	1270.52	13.4283	95.342
GBDS-15-Spot 240	627.977	238825	1.95928	11.9506	0.735007	2.2399	1.27194	0.194226	1.03808	0.816135	1144.23	10.8835	1193.62	8.92906	1284.2	14.2986	1284.2	14.2986	89.1005
GBDS-15-Spot 241	427.112	1.46566e+06	3.43851	11.8895	0.485017	2.51666	1.18361	0.217109	1.07968	0.912186	1266.58	12.4154	1276.86	8.60091	1294.18	9.43312	1294.18	9.43312	97.8678
GBDS-15-Spot 277	34.8593	87667.1	1.35484	11.8662	0.718379	2.53705	1.16168	0.218438	0.91293	0.785868	1273.62	10.5507	1282.73	8.46088	1298	13.9651	1298	13.9651	98.1215
GBDS-15-Spot 84	306.031	159522	2.43121	11.8299	0.745849	2.57346	1.44878	0.220895	1.24204	0.857303	1286.6	14.4865	1293.13	10.5944	1303.95	14.4863	1303.95	14.4863	98.6698
GBDS-15-Spot 7	173.478	150155	3.94158	11.8274	0.644374	2.54075	1.0672	0.218042	0.850706	0.797138	1271.52	9.81695	1283.79	7.77592	1304.36	12.5158	1304.36	12.5158	97.4827
GBDS-15-Spot 47	133.769	67905.1	2.27343	11.8191	0.654834	2.60636	1.22167	0.223514	1.03134	0.844207	1300.42	12.1455	1302.43	8.96518	1305.73	12.7154	1305.73	12.7154	99.5931
GBDS-15-Spot 52	42.639	40417.9	1.44704	11.7931	0.8375	2.59075	1.45742	0.221689	1.19276	0.818403	1290.79	13.9526	1298.03	10.6775	1309.99	16.2534	1309.99	16.2534	98.5342
GBDS-15-Spot 295	100.499	161599	2.0952	11.7114	0.565183	2.64077	1.42091	0.224402	1.30366	0.917488	1305.09	15.4024	1312.07	10.4652	1323.48	10.9475	1323.48	10.9475	98.6111
GBDS-15-Spot 179	328.421	379979	4.2319	11.7089	0.769524	2.34152	1.28727	0.198931	1.03194	0.801648	1169.57	11.0377	1224.99	9.15935	1323.89	14.9037	1323.89	14.9037	88.3437
GBDS-15-Spot 164	63.5156	50727.1	2.96811	11.682	0.795586	2.67192	1.24848	0.22648	0.96216	0.770664	1316.02	11.4534	1320.72	9.22474	1328.34	15.4007	1328.34	15.4007	99.0728
GBDS-15-Spot 161	128.992	73602.7	1.75186	11.6697	0.675197	2.60129	1.38011	0.220261	1.20367	0.872153	1283.25	14.0059	1301	10.1226	1330.38	13.0659	1330.38	13.0659	96.4576
GBDS-15-Spot 67	161.943	49144.8	3.72461	11.6311	1.68222	2.57414	2.47036	0.21724	1.80909	0.732317	1267.28	20.8134	1293.32	18.0674	1336.79	32.5261	1336.79	32.5261	94.7998
GBDS-15-Spot 97	74.9981	101948	1.90563	11.5755	0.682829	2.80495	1.52516	0.235587	1.36377	0.89418	1363.72	16.7625	1356.86	11.4167	1346.06	13.1842	1346.06	13.1842	101.312
GBDS-15-Spot 58	91.5408	79883.3	2.87996	11.4727	0.708067	2.83572	1.33872	0.236057	1.13613	0.848675	1366.17	13.9871	1365.04	10.0496	1363.26	13.6395	1363.26	13.6395	100.213
GBDS-15-Spot 37	530.269	157203	3.3482	11.42	0.765015	2.25579	1.63371	0.186918	1.44352	0.883586	1104.66	14.6545	1198.59	11.4938	1372.13	14.7186	1372.13	14.7186	80.507
GBDS-15-Spot 39	616.332	535366	1.90504	11.3089	0.597319	2.78081	1.24336	0.22818	1.09048	0.877046	1324.95	13.0603	1350.4	9.28593	1390.91	11.4616	1390.91	11.4616	95.2583
GBDS-15-Spot 21	65.2225	77430.2	3.33012	11.2536	1.0928	2.45787	1.58571	0.200696	1.14902	0.724611	1179.06	12.3809	1259.74	11.4451	1400.3	20.9427	1400.3	20.9427	84.2002
GBDS-15-Spot 206	149.607	152461	2.01363	11.2488	0.803343	2.64619	1.43072	0.215981	1.18389	0.82748	1260.61	13.5557	1313.58	10.5434	1401.11	15.3935	1401.11	15.3935	89.9718
GBDS-15-Spot 107	536.751	1.31947e+06	2.62429	11.1657	0.671002	2.53548	1.11666	0.205415	0.892569	0.799322	1204.35	9.80519	1282.28	8.1315	1415.32	12.8327	1415.32	12.8327	85.0935
GBDS-15-Spot 180	124.237	397133	1.51878	11.1199	0.767728	3.09563	1.03574	0.249769	0.695235	0.671245	1437.28	8.95691	1431.61	7.9491	1423.17	14.667	1423.17	14.667	100.992
GBDS-15-Spot 5	208.015	192178	2.36412	11.1053	0.697658	2.5096	1.3735	0.202219	1.18313	0.861392	1187.23	12.8288	1274.82	9.97288	1425.69	13.3238	1425.69	13.3238	83.2741
GBDS-15-Spot 73	30.9631	40906.8	1.34536	11.0483	0.832046	2.87964	1.43877	0.230846	1.17377	0.81582	1338.93	14.1913	1376.6	10.8438	1435.5	15.8693	1435.5	15.8693	93.2732
GBDS-15-Spot 171	209.747	173446	1.96013	11.0109	0.802523	2.99827	1.24705	0.239542	0.954515	0.765416	1384.31	11.8911	1407.18	9.49568	1441.96	15.2928	1441.96	15.2928	96.0019
GBDS-15-Spot 92	150.45	72081.5	1.17398	11.007	0.430899	3.25552	1.23863	0.260002	1.16126	0.937537	1489.85	15.4473	1470.49	9.62167	1442.64	8.21035	1442.64	8.21035	103.273
GBDS-15-Spot 200	72.5267	62315.2	3.2821	10.9803	0.808068	3.16173	1.48659	0.251899	1.24779	0.839363	1448.26	16.1852	1447.87	11.4681	1447.26	15.3875	1447.26	15.3875	100.069
GBDS-15-Spot 256	179.115	92884.4	3.0329	10.8597	0.708458	3.10226	1.24166	0.244447	1.0197	0.821245	1409.78	12.9122	1433.25	9.53452	1468.26	13.4525	1468.26	13.4525	96.0169
GBDS-15-Spot 99	15.0675	18697.9	1.72967	10.8513	1.20434	2.93593	1.9123	0.231163	1.48542	0.77677	1340.59	17.9792	1391.23	14.4848	1469.73	22.8646	1469.73	22.8646	91.2135
GBDS-15-Spot 93	126.398	132595	2.25669	10.3476	0.601447	3.65434	1.28891	0.274369	1.13998	0.884452	1562.94	15.8218	1561.46	10.2759	1559.43	11.283	1559.43	11.283	100.225
GBDS-15-Spot 126	49.6428	6547.15	3.36872	10.2397	2.78279	2.91656	2.96154	0.216694	1.01332	0.342158	1264.38	11.634	1386.21	22.3967	1579.06	52.0772	1579.06	52.0772	80.0717
GBDS-15-Spot 276	137.12	148891	1.24625	8.7657	0.679247	5.15917	1.09699	0.328137	0.861394	0.785238	1829.34	13.7193	1845.91	9.33041	1864.61	12.2604	1864.61	12.2604	98.1084
GBDS-15-Spot 196	271.054	310718	0.929285	8.55687	0.664376	5.36086	1.288	0.332841	1.10343	0.856697	1852.14	17.7632	1878.62	11.0225	1908.02	11.9316	1908.02	11.9316	97.071
GBDS-15-Spot 128	66.237	1.06144e+06	2.0188	7.86168	0.699095	6.4569	1.22779	0.368322	1.00932	0.822066	2021.5	17.5142	2040.05	10.7953	2058.84	12.3365	2058.84	12.3365	98.1863

## Sheet: Crossett Lumber E1
Table _____. U-Pb geochronologic analyses.
							Isotope ratios						Apparent ages (Ma)
Analysis	U	206Pb	U/Th	206Pb*	±	207Pb*	±	206Pb*	±	error	206Pb*	±	207Pb*	±	206Pb*	±	Best age	±	Conc
	(ppm)	204Pb		207Pb*	(%)	235U*	(%)	238U	(%)	corr.	238U*	(Ma)	235U	(Ma)	207Pb*	(Ma)	(Ma)	(Ma)	(%)
-Spot 201	198.357	1204.82	1.91714	29.2471	18.4764	0.0719778	18.5279	0.0152746	1.37997	0.0744805	97.7219	1.33836	70.5745	12.6326	NA	NA	97.7219	1.33836	NA
-Spot 31	413.259	6491.54	5.57249	21.0121	1.13943	0.132054	1.71941	0.0201329	1.28767	0.7489	128.496	1.63822	125.941	2.03655	77.9638	27.0479	128.496	1.63822	NA
-Spot 218	90.7869	9803.17	4.11173	19.3532	1.0506	0.35943	1.48641	0.0504726	1.05151	0.707411	317.422	3.25687	311.789	3.99052	269.855	24.0952	317.422	3.25687	NA
-Spot 247	340.667	3360	1.12452	20.329	1.394	0.347968	1.79052	0.0513266	1.12371	0.62759	322.661	3.53655	303.192	4.69324	155.898	32.6369	322.661	3.53655	NA
-Spot 195	861.135	30778.8	2.46489	16.6183	1.13023	0.45074	1.68692	0.05435	1.25231	0.742365	341.173	4.16144	377.797	5.32186	608.903	24.4339	341.173	4.16144	NA
-Spot 25	884.344	17161.4	24.6121	18.833	0.69168	0.424936	1.59825	0.0580673	1.44082	0.901503	363.861	5.09739	359.575	4.83956	332.032	15.6856	363.861	5.09739	NA
-Spot 194	167.166	49831.3	2.36598	18.2871	0.716428	0.500204	1.53339	0.0663713	1.35574	0.884142	414.257	5.43958	411.841	5.19139	398.299	16.0572	414.257	5.43958	104.006
-Spot 52	294.33	144718	5.53114	18.1253	0.920647	0.530845	1.61063	0.0698137	1.32157	0.820528	435.033	5.55957	432.37	5.6711	418.187	20.563	435.033	5.55957	104.028
-Spot 192	636.544	37486.7	1.94423	17.7263	0.644984	0.576766	1.16419	0.0741832	0.96919	0.832503	461.309	4.31474	462.381	4.32402	467.69	14.2825	461.309	4.31474	98.6355
-Spot 198	442.637	35489.5	65.7165	16.485	0.6739	0.79687	1.33513	0.0953156	1.15257	0.863268	586.898	6.46563	595.061	6.01213	626.283	14.5474	586.898	6.46563	93.7114
-Spot 62	89.8282	8088.44	3.18601	14.3089	1.47612	1.56406	2.09066	0.162385	1.48051	0.708154	970.016	13.3329	956.075	12.9497	924.119	30.3118	924.119	30.3118	104.966
-Spot 56	152.252	10832.1	4.03689	14.2839	1.30193	1.43148	2.02489	0.148361	1.55086	0.765898	891.77	12.9162	902.168	12.1051	927.71	26.7366	927.71	26.7366	96.1259
-Spot 140	122.127	7478.04	4.59435	14.1483	0.934786	1.56839	1.28999	0.161008	0.888953	0.689118	962.375	7.9471	957.79	7.99866	947.289	19.138	947.289	19.138	101.592
-Spot 35	644.007	46482.7	6.6098	14.1449	0.626671	1.43045	1.73425	0.146811	1.61706	0.93243	883.063	13.3448	901.737	10.3643	947.787	12.8423	947.787	12.8423	93.171
-Spot 64	665.705	40563.8	19.8169	14.1236	0.528522	1.45452	1.08444	0.149057	0.946925	0.873195	895.676	7.91854	911.745	6.52519	950.858	10.8138	950.858	10.8138	94.1966
-Spot 71	64.911	6643.67	6.9933	14.1016	1.69252	1.61738	2.03598	0.165489	1.13163	0.555816	987.208	10.3582	976.975	12.7753	954.022	34.6169	954.022	34.6169	103.479
-Spot 87	279.476	14622.2	5.30361	14.0964	0.799078	1.52464	1.75109	0.155942	1.55813	0.889809	934.186	13.5504	940.344	10.738	954.776	16.3401	954.776	16.3401	97.8435
-Spot 134	53.2596	19515.3	1.63688	14.0575	0.873362	1.48335	1.80102	0.1513	1.57509	0.874555	908.249	13.3437	923.601	10.9237	960.461	17.8449	960.461	17.8449	94.5638
-Spot 58	213.068	9830.03	1.80146	14.0562	0.788234	1.5156	1.60175	0.154575	1.39438	0.870534	926.56	12.0342	936.703	9.79898	960.657	16.1048	960.657	16.1048	96.4506
-Spot 103	110.769	7732.93	2.85401	14.0389	1.10023	1.66521	1.76266	0.169625	1.37712	0.781273	1010.05	12.8746	995.362	11.1829	963.165	22.471	963.165	22.471	104.867
-Spot 80	186.449	10238.2	4.11953	14.0314	1.07947	1.60568	1.97541	0.163473	1.65439	0.837491	976.049	14.9846	972.424	12.3608	964.262	22.0406	964.262	22.0406	101.222
-Spot 216	210.765	20801.4	3.86206	14.0137	0.772886	1.498	1.31397	0.152318	1.06262	0.808709	913.944	9.05468	929.573	8.00096	966.805	15.7767	966.805	15.7767	94.5323
-Spot 36	76.2023	6574.48	2.8871	13.9961	1.00844	1.67613	1.64485	0.170216	1.29946	0.790015	1013.3	12.1847	999.513	10.461	969.395	20.5799	969.395	20.5799	104.529
-Spot 65	143.048	12977.6	4.12296	13.9841	0.816909	1.58545	1.66948	0.16087	1.45596	0.872105	961.611	13.0065	964.514	10.3955	971.156	16.6637	971.156	16.6637	99.0171
-Spot 145	175.536	10307.1	2.71179	13.9815	0.659709	1.58341	1.30309	0.160633	1.12376	0.862379	960.293	10.0261	963.71	8.10989	971.532	13.4376	971.532	13.4376	98.8431
-Spot 63	84.0573	4627.1	3.66791	13.967	0.892357	1.69526	1.34231	0.171801	1.00274	0.747027	1022.03	9.47718	1006.75	8.57289	973.642	18.1969	973.642	18.1969	104.97
-Spot 250	136.658	8155.83	3.45749	13.9361	1.10562	1.64247	1.63784	0.166082	1.20836	0.737774	990.49	11.0945	986.66	10.3372	978.132	22.5292	978.132	22.5292	101.263
-Spot 41	187.985	9517.06	4.08974	13.9286	1.39787	1.58667	1.91407	0.160355	1.30752	0.683112	958.749	11.6482	964.99	11.9221	979.255	28.4673	979.255	28.4673	97.906
-Spot 4	127.382	9993.84	1.99509	13.9255	0.925096	1.63553	1.44421	0.165255	1.10903	0.767912	985.916	10.139	983.99	9.10044	979.715	18.8268	979.715	18.8268	100.633
-Spot 33	128.635	24187.9	3.09809	13.9194	0.738777	1.70676	1.41387	0.172378	1.2055	0.852625	1025.2	11.4261	1011.07	9.05258	980.607	15.0485	980.607	15.0485	104.547
-Spot 153	67.3539	9749.64	3.86156	13.9122	0.74187	1.64594	1.14782	0.166149	0.875851	0.763057	990.858	8.04438	987.995	7.25011	981.658	15.0893	981.658	15.0893	100.937
-Spot 30	801.771	361048	44.2801	13.8837	0.691007	1.54984	1.46735	0.156127	1.29446	0.882175	935.218	11.2689	950.428	9.05627	985.81	14.0536	985.81	14.0536	94.8679
-Spot 111	202	1.74059e+06	5.52172	13.8806	0.701596	1.68533	1.32774	0.169739	1.12723	0.848986	1010.67	10.5444	1003	8.46134	986.277	14.2713	986.277	14.2713	102.473
-Spot 147	317.351	242206	6.64956	13.8806	0.758417	1.4904	1.50235	0.150106	1.29686	0.863224	901.558	10.9112	926.48	9.12947	986.28	15.4154	986.28	15.4154	91.4099
-Spot 102	132.26	15222.7	4.90838	13.854	1.04974	1.62704	1.65416	0.163554	1.2784	0.772839	976.496	11.584	980.716	10.4029	990.161	21.3408	990.161	21.3408	98.62
-Spot 127	265.608	19488.4	2.94953	13.8393	0.63986	1.67827	1.53763	0.168525	1.39818	0.909304	1003.98	12.9989	1000.33	9.78372	992.346	12.9916	992.346	12.9916	101.173
-Spot 23	84.948	9529.34	2.11232	13.8102	1.07242	1.74318	2.01255	0.174674	1.70302	0.8462	1037.81	16.3249	1024.64	12.9864	996.598	21.7855	996.598	21.7855	104.136
-Spot 171	163.475	72721.5	3.69226	13.7955	0.607194	1.47923	1.37353	0.148068	1.23203	0.896981	890.123	10.2431	921.914	8.3214	998.751	12.3173	998.751	12.3173	89.1236
-Spot 47	167.602	138295	5.08272	13.7927	0.764718	1.7247	1.40526	0.172604	1.17896	0.838967	1026.44	11.1871	1017.78	9.03218	999.171	15.5278	999.171	15.5278	102.729
-Spot 93	383.209	2.5454e+06	3.16741	13.7888	0.943256	1.64056	1.66307	0.164137	1.3697	0.823595	979.727	12.4493	985.928	10.4918	999.737	19.1376	999.737	19.1376	97.9985
-Spot 174	276.426	20866.6	7.98326	13.7864	0.70556	1.74092	1.16485	0.174148	0.926851	0.795685	1034.92	8.86183	1023.8	7.51258	1000.1	14.3223	1000.1	14.3223	103.482
-Spot 45	105.134	13237.1	2.51909	13.7719	0.778054	1.71477	1.70037	0.171351	1.51192	0.889169	1019.55	14.2576	1014.07	10.9059	1002.23	15.784	1002.23	15.784	101.728
-Spot 38	57.7615	6380.07	1.40733	13.7519	0.703909	1.73532	1.51722	0.173153	1.34405	0.885864	1029.46	12.7882	1021.73	9.77383	1005.18	14.2661	1005.18	14.2661	102.415
-Spot 57	320.215	39154.7	3.99285	13.7431	0.67783	1.65474	1.41554	0.165007	1.2427	0.877897	984.542	11.3464	991.367	8.95923	1006.48	13.7401	1006.48	13.7401	97.8202
-Spot 158	429.676	125402	7.58578	13.7359	0.506672	1.69941	1.05081	0.169372	0.920585	0.876075	1008.65	8.59549	1008.31	6.71719	1007.55	10.2789	1007.55	10.2789	100.11
-Spot 154	80.822	5650.53	1.34897	13.73	1.09654	1.73843	1.74838	0.173187	1.36177	0.778877	1029.65	12.959	1022.88	11.2704	1008.41	22.2278	1008.41	22.2278	102.106
-Spot 26	92.4973	8110.76	1.96606	13.7288	0.865014	1.76655	1.43188	0.175973	1.14106	0.796899	1044.94	11.0072	1033.26	9.28401	1008.59	17.527	1008.59	17.527	103.604
-Spot 77	63.632	15161.3	2.34232	13.722	0.920935	1.74173	1.65599	0.173415	1.37629	0.8311	1030.9	13.1118	1024.1	10.6822	1009.59	18.6626	1009.59	18.6626	102.11
-Spot 42	335.318	39480.6	3.551	13.7201	0.87042	1.53146	1.92422	0.152459	1.7161	0.891841	914.73	14.6348	943.085	11.8206	1009.87	17.6317	1009.87	17.6317	90.5786
-Spot 148	32.3051	6456.82	2.43388	13.7161	1.49463	1.778	1.99092	0.176949	1.31524	0.660618	1050.29	12.7472	1037.45	12.9392	1010.48	30.2867	1010.48	30.2867	103.94
-Spot 12	164.993	18571.1	13.3098	13.706	0.818217	1.6889	1.33736	0.167958	1.05785	0.791	1000.85	9.80656	1004.35	8.52937	1011.97	16.5869	1011.97	16.5869	98.9017
-Spot 68	229.132	18470.8	3.76871	13.7037	0.799684	1.70704	1.34696	0.169734	1.08388	0.804689	1010.64	10.1387	1011.17	8.62468	1012.31	16.2095	1012.31	16.2095	99.8356
-Spot 208	284.495	45788.7	1.93678	13.6986	0.79601	1.71186	1.55881	0.17015	1.34025	0.859787	1012.94	12.563	1012.98	9.99167	1013.06	16.1336	1013.06	16.1336	99.9882
-Spot 164	487.581	31026.8	5.29723	13.6981	0.599958	1.67744	1.02515	0.166722	0.831253	0.81086	994.026	7.65734	1000.01	6.52155	1013.14	12.1608	1013.14	12.1608	98.1138
-Spot 46	347.63	22885.6	5.04438	13.6874	0.869826	1.72992	1.70315	0.171804	1.46428	0.859749	1022.05	13.8395	1019.72	10.9591	1014.71	17.6255	1014.71	17.6255	100.723
-Spot 75	200.048	20164	3.62854	13.687	0.643586	1.68865	1.38092	0.1677	1.22177	0.884755	999.429	11.3113	1004.25	8.80671	1014.78	13.0411	1014.78	13.0411	98.4875
-Spot 202	248.274	11034.1	6.02677	13.6848	1.02265	1.80356	1.73758	0.179084	1.40477	0.808463	1061.97	13.7542	1046.75	11.3505	1015.1	20.7029	1015.1	20.7029	104.617
-Spot 19	321.842	20629.8	5.34714	13.6744	0.899253	1.65822	1.32817	0.164528	0.977433	0.735926	981.891	8.90216	992.697	8.41287	1016.63	18.2159	1016.63	18.2159	96.5826
-Spot 242	183.26	12675.4	2.79519	13.6717	0.98212	1.70962	1.4324	0.169593	1.0427	0.727935	1009.87	9.74653	1012.14	9.17693	1017.04	19.8946	1017.04	19.8946	99.2948
-Spot 108	654.149	35255.7	12.4749	13.6706	0.649613	1.72095	1.1644	0.170703	0.966351	0.829912	1015.98	9.0834	1016.38	7.47804	1017.2	13.1582	1017.2	13.1582	99.8801
-Spot 220	92.2396	7057.91	1.42213	13.6685	0.886688	1.72563	1.60787	0.171142	1.34128	0.834196	1018.4	12.6352	1018.13	10.3366	1017.52	17.9604	1017.52	17.9604	100.087
-Spot 137	348.851	71292.7	2.80438	13.6593	0.490817	1.72917	1.05266	0.171377	0.93123	0.884645	1019.69	8.78277	1019.44	6.77221	1018.88	9.93868	1018.88	9.93868	100.08
-Spot 43	69.0675	58579.8	2.21265	13.6551	0.869993	1.74275	1.50598	0.17267	1.22926	0.816255	1026.8	11.6682	1024.48	9.71652	1019.5	17.6169	1019.5	17.6169	100.716
-Spot 110	199.781	34027.6	1.9891	13.6515	0.721835	1.72014	1.55771	0.170386	1.38037	0.886152	1014.24	12.9544	1016.08	10.0024	1020.03	14.6141	1020.03	14.6141	99.4323
-Spot 236	131.761	8117.21	5.5372	13.6463	0.841137	1.72357	1.74705	0.17066	1.53123	0.876467	1015.75	14.39	1017.36	11.2265	1020.81	17.029	1020.81	17.029	99.5041
-Spot 14	90.8833	28581.6	1.64651	13.6394	0.921066	1.72328	1.53294	0.170545	1.22538	0.799363	1015.11	11.5091	1017.25	9.84993	1021.83	18.6433	1021.83	18.6433	99.3426
-Spot 98	651.444	76903.7	7.14255	13.6387	0.561015	1.72003	1.18459	0.170215	1.04332	0.880743	1013.3	9.78292	1016.04	7.60621	1021.93	11.355	1021.93	11.355	99.1555
-Spot 182	140.248	41173.4	3.47201	13.6332	0.637613	1.70289	1.24248	0.16845	1.06639	0.858281	1003.56	9.91052	1009.62	7.94849	1022.75	12.9053	1022.75	12.9053	98.1236
-Spot 239	185.948	14303.6	5.49414	13.6258	0.898183	1.7293	2.52368	0.17097	2.35844	0.934523	1017.45	22.1983	1019.49	16.2376	1023.85	18.1743	1023.85	18.1743	99.3756
-Spot 245	122.108	49063.7	3.276	13.6203	0.881109	1.69229	1.58901	0.167244	1.32235	0.832184	996.908	12.2139	1005.63	10.142	1024.66	17.8275	1024.66	17.8275	97.2919
-Spot 120	96.7045	27706.1	2.87441	13.619	0.846945	1.7488	1.37817	0.172812	1.08722	0.788884	1027.58	10.3271	1026.72	8.90312	1024.86	17.1353	1024.86	17.1353	100.266
-Spot 129	70.6881	36999.4	1.802	13.618	0.738399	1.79481	1.31339	0.177346	1.08617	0.826996	1052.46	10.5471	1043.58	8.56447	1025	14.9383	1025	14.9383	102.679
-Spot 207	76.0198	39615.8	2.19441	13.5974	0.801884	1.72202	1.89717	0.169896	1.71937	0.906282	1011.54	16.0963	1016.78	12.1872	1028.06	16.2356	1028.06	16.2356	98.3929
-Spot 185	249.444	21965	3.05312	13.5664	0.781137	1.79816	1.33631	0.177003	1.08422	0.811358	1050.58	10.5109	1044.79	8.71971	1032.68	15.8045	1032.68	15.8045	101.734
-Spot 67	38.0676	8532.41	2.05238	13.5567	1.04135	1.85896	1.65677	0.182857	1.28859	0.777775	1082.56	12.8414	1066.62	10.9388	1034.12	21.0586	1034.12	21.0586	104.684
-Spot 9	203.726	31477.7	1.75348	13.5546	0.848884	1.68235	1.60093	0.165459	1.35734	0.847846	987.043	12.4223	1001.87	10.1957	1034.44	17.1691	1034.44	17.1691	95.4178
-Spot 209	119.223	6055.18	3.03566	13.5513	0.848997	1.80284	1.91979	0.177265	1.72186	0.8969	1052.02	16.7135	1046.49	12.5391	1034.94	17.1689	1034.94	17.1689	101.65
-Spot 18	90.9743	18836.7	2.2417	13.5452	0.761721	1.72019	1.24733	0.169063	0.987734	0.791878	1006.95	9.20808	1016.1	8.00937	1035.85	15.4049	1035.85	15.4049	97.2097
-Spot 121	1032.75	155787	3.12052	13.5321	0.635204	1.77568	1.26874	0.174348	1.09828	0.865645	1036.02	10.5112	1036.6	8.24151	1037.79	12.8449	1037.79	12.8449	99.8295
-Spot 155	287.565	41944.6	5.97078	13.5299	0.592493	1.7571	1.24001	0.172497	1.0893	0.878461	1025.85	10.3308	1029.78	8.02429	1038.12	11.9824	1038.12	11.9824	98.8183
-Spot 81	112.091	13174.3	2.11358	13.5279	0.631196	1.79468	1.23087	0.17616	1.05671	0.858505	1045.96	10.2027	1043.53	8.02614	1038.42	12.7627	1038.42	12.7627	100.726
-Spot 244	222.124	97996.1	2.87122	13.516	0.721821	1.78902	1.26559	0.17545	1.03956	0.821407	1042.07	10.0027	1041.47	8.24321	1040.19	14.5881	1040.19	14.5881	100.18
-Spot 6	232.571	136758	2.44526	13.5081	0.735697	1.73978	1.52125	0.17052	1.33153	0.875283	1014.98	12.5045	1023.38	9.80898	1041.37	14.8662	1041.37	14.8662	97.4652
-Spot 49	117.783	6625.63	2.01228	13.5035	0.77505	1.83959	1.30616	0.180241	1.05136	0.804921	1068.29	10.3502	1059.71	8.59214	1042.07	15.6591	1042.07	15.6591	102.516
-Spot 72	122.78	31147	2.81003	13.4481	0.937413	1.79967	1.61058	0.175606	1.30967	0.813164	1042.93	12.6112	1045.34	10.5127	1050.4	18.912	1050.4	18.912	99.2889
-Spot 205	88.9132	6046.58	4.52522	13.4466	1.287	1.85945	1.70194	0.18142	1.11366	0.654344	1074.73	11.0243	1066.79	11.2381	1050.61	25.9466	1050.61	25.9466	102.295
-Spot 69	211.593	12522.8	4.38137	13.4392	0.558867	1.86154	1.64716	0.181523	1.54945	0.940681	1075.29	15.3457	1067.53	10.8806	1051.73	11.2807	1051.73	11.2807	102.24
-Spot 215	31.9424	22356	5.13237	13.4337	1.16377	1.76399	1.76565	0.171942	1.32784	0.752041	1022.8	12.5586	1032.32	11.4423	1052.55	23.4537	1052.55	23.4537	97.1738
-Spot 54	198.578	152775	1.0405	13.4337	0.924407	1.59335	1.65208	0.155309	1.36925	0.828802	930.654	11.8658	967.611	10.3068	1052.55	18.6441	1052.55	18.6441	88.419
-Spot 105	189.928	19012	2.72644	13.4315	0.849567	1.85771	1.64266	0.181046	1.4059	0.85587	1072.69	13.893	1066.17	10.8431	1052.88	17.1346	1052.88	17.1346	101.881
-Spot 10	170.207	15545.3	2.78832	13.4314	0.963586	1.73043	1.75257	0.168641	1.4639	0.835287	1004.62	13.618	1019.91	11.2784	1052.9	19.4326	1052.9	19.4326	95.4146
-Spot 16	627.991	62127.2	13.8861	13.4163	0.755546	1.69942	1.64666	0.165433	1.46309	0.888521	986.897	13.3883	1008.31	10.5264	1055.16	15.2351	1055.16	15.2351	93.5305
-Spot 184	187.312	92767.3	1.80285	13.4131	0.500494	1.8212	1.09248	0.177244	0.971094	0.888888	1051.9	9.4251	1053.12	7.16102	1055.65	10.0793	1055.65	10.0793	99.645
-Spot 132	254.333	56275.6	3.55428	13.3944	0.651483	1.77228	1.20194	0.172244	1.01006	0.84036	1024.47	9.56736	1035.36	7.80216	1058.45	13.1146	1058.45	13.1146	96.7894
-Spot 197	178.073	12657.2	2.07409	13.3822	0.863922	1.78795	1.24772	0.173609	0.90025	0.721515	1031.97	8.58482	1041.08	8.12509	1060.28	17.3669	1060.28	17.3669	97.3296
-Spot 240	177.168	512476	3.67269	13.3696	0.688164	1.79011	1.36961	0.173655	1.18417	0.864605	1032.22	11.2948	1041.87	8.92272	1062.18	13.8362	1062.18	13.8362	97.1791
-Spot 104	247.173	94611.1	10.8154	13.3666	0.734215	1.83243	1.51476	0.17772	1.32493	0.874677	1054.51	12.8886	1057.15	9.95074	1062.63	14.7559	1062.63	14.7559	99.2356
-Spot 146	83.8339	11254	2.15314	13.3475	0.863673	1.84708	1.769	0.178884	1.54383	0.872716	1060.88	15.1015	1062.39	11.6536	1065.52	17.3514	1065.52	17.3514	99.5646
-Spot 212	235.094	156511	1.61921	13.3331	0.868107	1.72656	1.58842	0.167032	1.33022	0.837445	995.736	12.2732	1018.47	10.2136	1067.69	17.431	1067.69	17.431	93.2611
-Spot 133	46.2574	7971.59	3.04532	13.3233	0.943533	1.85102	1.16959	0.178942	0.691153	0.590935	1061.19	6.76257	1063.79	7.71052	1069.16	18.9442	1069.16	18.9442	99.2547
-Spot 183	101.735	42186.6	7.0487	13.3199	0.791333	1.81257	1.23927	0.175179	0.953717	0.769581	1040.58	9.16463	1050	8.10952	1069.68	15.9027	1069.68	15.9027	97.2798
-Spot 119	347.653	51534.3	4.17156	13.3008	0.595468	1.85335	1.17954	0.178864	1.0182	0.863218	1060.77	9.95889	1064.62	7.77952	1072.55	11.9577	1072.55	11.9577	98.9017
-Spot 152	509.759	46433.2	4.05951	13.2668	0.623439	1.68898	1.52116	0.162585	1.38753	0.912155	971.126	12.5088	1004.38	9.70185	1077.65	12.4956	1077.65	12.4956	90.115
-Spot 238	612.763	36175.3	2.81097	13.2652	0.658031	1.78504	1.54041	0.17181	1.39279	0.904167	1022.08	13.1642	1040.02	10.0253	1077.9	13.2075	1077.9	13.2075	94.8211
-Spot 177	182.774	104532	3.12738	13.2589	0.69669	1.88836	1.22795	0.181669	1.01118	0.82347	1076.09	10.0215	1077	8.15179	1078.87	13.9813	1078.87	13.9813	99.7415
-Spot 20	79.2298	26640.6	1.79596	13.2388	0.844371	1.89683	1.56518	0.182207	1.31789	0.842003	1079.02	13.0939	1079.98	10.4067	1081.93	16.9184	1081.93	16.9184	99.7316
-Spot 39	118.585	29035.3	3.41545	13.1927	0.777997	1.71095	2.08079	0.163779	1.92987	0.927471	977.743	17.5079	1012.64	13.3351	1088.89	15.5798	1088.89	15.5798	89.7929
-Spot 60	403.153	95561.5	2.33158	13.1809	0.730566	1.94649	1.72126	0.186159	1.55852	0.905457	1100.53	15.7679	1097.24	11.5463	1090.68	14.6543	1090.68	14.6543	100.903
-Spot 225	81.9433	23830.6	1.77817	13.1757	1.12238	1.90332	1.95324	0.181959	1.59857	0.818416	1077.67	15.8643	1082.25	13.0025	1091.51	22.4832	1091.51	22.4832	98.7316
-Spot 167	116.724	39599.6	2.31761	13.1098	0.758005	2.02112	1.47906	0.192254	1.27006	0.858693	1133.57	13.2023	1122.64	10.0474	1101.55	15.1803	1101.55	15.1803	102.907
-Spot 1	178.841	49931	7.24283	13.082	0.759625	1.97908	1.51426	0.187855	1.30995	0.865073	1109.75	13.3547	1108.41	10.2147	1105.76	15.195	1105.76	15.195	100.361
-Spot 118	275.049	31963	2.7693	13.072	0.801439	1.92844	1.74364	0.18291	1.54854	0.888108	1082.85	15.4357	1091	11.6594	1107.27	16.0074	1107.27	16.0074	97.7945
-Spot 8	173.994	142199	4.12434	13.0676	0.906325	1.89156	1.62758	0.179351	1.35189	0.830611	1063.43	13.2532	1078.13	10.8113	1107.95	18.1278	1107.95	18.1278	95.9816
-Spot 24	190.045	56720.8	3.38089	13.0175	1.20629	1.78123	1.83161	0.168242	1.37829	0.752499	1002.42	12.7956	1038.63	11.9115	1115.66	24.069	1115.66	24.069	89.8495
-Spot 143	145.811	12300.2	2.58846	12.9785	0.601624	1.90596	1.20175	0.179484	1.04031	0.865664	1064.15	10.205	1083.17	8.00342	1121.61	12.015	1121.61	12.015	94.8769
-Spot 178	125.594	44687.6	1.89064	12.9596	0.592213	2.1034	1.22037	0.19779	1.06704	0.874361	1163.43	11.3585	1149.92	8.39874	1124.51	11.8223	1124.51	11.8223	103.462
-Spot 91	175.869	11390.4	3.00817	12.9437	1.02512	2.08179	2.15953	0.195517	1.90071	0.88015	1151.19	20.0384	1142.82	14.8134	1126.98	20.4385	1126.98	20.4385	102.148
-Spot 126	244.042	196751	2.43036	12.9182	0.68287	2.07577	1.1713	0.194567	0.951641	0.812469	1146.07	9.99194	1140.84	8.02658	1130.93	13.5982	1130.93	13.5982	101.339
-Spot 3	124.652	23926.7	1.6628	12.9089	0.874305	2.06678	1.85279	0.193584	1.63353	0.88166	1140.76	17.079	1137.87	12.6792	1132.33	17.3889	1132.33	17.3889	100.744
-Spot 106	151.314	11544.7	3.61145	12.9071	0.867776	2.02056	1.46669	0.189229	1.18243	0.806189	1117.2	12.1287	1122.45	9.96243	1132.61	17.2576	1132.61	17.2576	98.639
-Spot 86	82.4117	34800.8	6.67363	12.8958	0.663123	2.05471	1.42964	0.19226	1.26654	0.885919	1133.6	13.166	1133.86	9.76449	1134.38	13.2039	1134.38	13.2039	99.9319
-Spot 130	172.763	127208	2.38625	12.8806	0.747809	2.09366	1.46911	0.195673	1.26454	0.860754	1152.03	13.3405	1146.73	10.0956	1136.69	14.861	1136.69	14.861	101.349
-Spot 241	246.258	26331.4	13.2355	12.8673	0.767506	2.04883	1.45864	0.191284	1.24039	0.850374	1128.33	12.8393	1131.91	9.95325	1138.75	15.2564	1138.75	15.2564	99.0846
-Spot 124	229.506	42652.5	4.66262	12.8543	0.718336	2.09535	1.6055	0.195431	1.43583	0.894322	1150.73	15.1318	1147.28	11.0358	1140.77	14.2778	1140.77	14.2778	100.873
-Spot 186	252.79	19437.8	6.42947	12.8222	0.530506	2.08057	1.08062	0.193568	0.941431	0.871199	1140.68	9.84224	1142.42	7.41071	1145.76	10.5223	1145.76	10.5223	99.5564
-Spot 44	417.752	18033.6	4.80308	12.7935	0.898346	1.97688	1.74154	0.18351	1.49196	0.856688	1086.12	14.9129	1107.66	11.7436	1150.17	17.8573	1150.17	17.8573	94.4311
-Spot 196	239.34	46033.8	6.14127	12.7844	0.714784	2.08929	1.3463	0.193806	1.14088	0.847419	1141.96	11.9396	1145.29	9.24535	1151.6	14.1783	1151.6	14.1783	99.1631
-Spot 163	125.404	17360.4	1.93521	12.7715	0.73778	2.14268	1.35738	0.198558	1.13936	0.839387	1167.57	12.1677	1162.69	9.39722	1153.6	14.6622	1153.6	14.6622	101.211
-Spot 92	83.5656	11644.5	3.23663	12.7685	0.857618	2.10953	1.28808	0.19544	0.961059	0.746119	1150.78	10.1287	1151.92	8.87307	1154.06	17.0235	1154.06	17.0235	99.7154
-Spot 136	205.607	28902	1.87262	12.7647	0.740105	2.16027	1.28213	0.200081	1.04694	0.816569	1175.76	11.2522	1168.36	8.8993	1154.66	14.6994	1154.66	14.6994	101.827
-Spot 169	556.243	29753.4	3.16703	12.7602	1.00234	2.14585	1.31472	0.198675	0.850771	0.647111	1168.2	9.09017	1163.71	9.10618	1155.36	19.8891	1155.36	19.8891	101.111
-Spot 117	651.753	112427	1.57425	12.7523	0.60837	1.96245	1.06472	0.181584	0.873799	0.820681	1075.62	8.6565	1102.72	7.1618	1156.58	12.07	1156.58	12.07	93.0002
-Spot 122	255.168	56383	2.58556	12.7448	0.744546	2.13316	1.21615	0.197263	0.9616	0.790691	1160.6	10.2134	1159.61	8.40753	1157.75	14.7688	1157.75	14.7688	100.246
-Spot 214	109.236	26834.9	4.85538	12.7431	0.862759	2.20995	1.69724	0.204336	1.4616	0.861163	1198.57	15.9862	1184.2	11.8653	1158.01	17.1232	1158.01	17.1232	103.503
-Spot 61	314.331	59098.1	2.79952	12.7424	0.639916	2.04983	1.68124	0.18952	1.5547	0.924731	1118.78	15.9679	1132.24	11.4742	1158.13	12.7029	1158.13	12.7029	96.6022
-Spot 189	190.464	33516.8	1.64329	12.7249	0.669103	2.07706	1.08221	0.191774	0.850572	0.78596	1130.98	8.82317	1141.26	7.41755	1160.85	13.2747	1160.85	13.2747	97.4263
-Spot 112	188.298	15649.8	5.22583	12.7229	0.641644	2.16049	1.26649	0.199446	1.09192	0.862163	1172.34	11.7046	1168.43	8.79106	1161.17	12.7374	1161.17	12.7374	100.962
-Spot 213	106.482	21069.1	4.21146	12.7214	0.700508	2.15203	1.375	0.198642	1.18318	0.860493	1168.02	12.6401	1165.71	9.5324	1161.39	13.8882	1161.39	13.8882	100.571
-Spot 226	232.723	24532.4	3.09154	12.7155	0.492932	2.06191	1.42809	0.190235	1.34032	0.93854	1122.65	13.8097	1136.25	9.76506	1162.31	9.7896	1162.31	9.7896	96.5875
-Spot 149	285.752	42213.7	3.9152	12.6983	0.828446	2.10969	1.45675	0.19438	1.19825	0.82255	1145.06	12.5712	1151.97	10.0353	1164.99	16.4287	1164.99	16.4287	98.2892
-Spot 235	151.571	22199.2	3.81375	12.6901	0.779378	2.13871	1.22346	0.196927	0.943094	0.770841	1158.79	10.0026	1161.41	8.46507	1166.27	15.4587	1166.27	15.4587	99.359
-Spot 11	158.367	28102.1	3.01443	12.6834	0.796543	2.09946	1.49141	0.19321	1.26088	0.845429	1138.74	13.1615	1148.63	10.258	1167.33	15.7955	1167.33	15.7955	97.5514
-Spot 96	141.222	21325.3	3.63918	12.6795	0.800675	2.12288	1.23715	0.195306	0.943117	0.762328	1150.05	9.93391	1156.27	8.53954	1167.93	15.876	1167.93	15.876	98.469
-Spot 90	719.43	6.61108e+06	3.27611	12.673	0.914721	2.09087	1.64229	0.192262	1.36397	0.830527	1133.62	14.1789	1145.81	11.2809	1168.99	18.1327	1168.99	18.1327	96.974
-Spot 51	460.065	69561.4	5.42633	12.6626	0.900634	2.1108	1.62439	0.193935	1.35185	0.832221	1142.66	14.1555	1152.34	11.1921	1170.61	17.8338	1170.61	17.8338	97.6123
-Spot 157	168.826	77436.8	3.27798	12.6262	0.725016	2.20151	1.13114	0.201688	0.868236	0.767575	1184.38	9.39389	1181.52	7.89808	1176.31	14.3608	1176.31	14.3608	100.687
-Spot 78	113.922	9433.59	3.43684	12.6213	0.860507	2.18137	1.68493	0.199766	1.44863	0.859754	1174.06	15.5489	1175.12	11.7313	1177.08	17.0202	1177.08	17.0202	99.7438
-Spot 138	510.563	1.45677e+06	16.2633	12.5798	0.65384	2.11473	1.41314	0.193027	1.25278	0.886522	1137.75	13.0666	1153.62	9.74234	1183.58	12.9086	1183.58	12.9086	96.1282
-Spot 168	61.8428	6796.98	2.85219	12.5751	0.792579	2.15318	1.29034	0.196463	1.01823	0.789117	1156.29	10.7781	1166.08	8.94696	1184.32	15.6487	1184.32	15.6487	97.6332
-Spot 84	190.95	33734.6	19.6644	12.5038	1.01022	2.05694	2.4122	0.186617	2.19047	0.90808	1103.02	22.2074	1134.6	16.4822	1195.53	19.9095	1195.53	19.9095	92.2618
-Spot 13	59.8327	7014.72	2.74272	12.4783	0.8299	2.14518	1.40491	0.194226	1.13359	0.80688	1144.22	11.8849	1163.5	9.7299	1199.56	16.3441	1199.56	16.3441	95.3874
-Spot 170	294.854	19576.3	3.19269	12.4513	0.630049	2.202	1.4446	0.198939	1.29996	0.899878	1169.62	13.9051	1181.68	10.0876	1203.84	12.4233	1203.84	12.4233	97.1575
-Spot 2	157.165	17193.1	3.7433	12.4291	0.811708	2.22832	1.54772	0.200957	1.31779	0.85144	1180.46	14.2148	1189.99	10.8478	1207.34	15.9738	1207.34	15.9738	97.7735
-Spot 107	114.126	9531.17	1.57526	12.3805	0.727449	2.27968	1.24692	0.204787	1.01273	0.812186	1200.98	11.0969	1206.02	8.80076	1215.03	14.3276	1215.03	14.3276	98.8439
-Spot 223	174.138	218737	4.50425	12.3595	1.19055	2.18417	1.70917	0.195874	1.22631	0.717491	1153.12	12.9482	1176.01	11.9049	1218.37	23.3894	1218.37	23.3894	94.6438
-Spot 76	192.184	56892.5	1.7327	12.3028	0.890359	2.30758	1.35059	0.205992	1.01556	0.751935	1207.43	11.1822	1214.62	9.56782	1227.44	17.4897	1227.44	17.4897	98.3699
-Spot 17	124.294	1.00984e+06	3.06782	12.2635	0.679096	2.31058	1.33483	0.2056	1.14918	0.860914	1205.33	12.6335	1215.54	9.45989	1233.73	13.3406	1233.73	13.3406	97.6984
-Spot 79	199.523	12523.1	4.6713	12.1759	0.746822	2.37516	1.5945	0.209838	1.40879	0.88353	1227.95	15.7515	1235.16	11.3939	1247.73	14.6044	1247.73	14.6044	98.4148
-Spot 237	98.0092	13911.3	2.95692	12.1254	0.99009	2.45611	1.73629	0.216089	1.42634	0.821484	1261.18	16.3383	1259.22	12.5295	1255.9	19.3451	1255.9	19.3451	100.42
-Spot 204	89.2389	92178.5	2.61033	12.0354	0.698354	2.49213	1.30758	0.21763	1.10547	0.845434	1269.34	12.7371	1269.75	9.47527	1270.46	13.6164	1270.46	13.6164	99.9117
-Spot 144	483.022	148536	2.24111	12.0238	0.640986	2.22208	1.29481	0.19386	1.12502	0.868869	1142.25	11.7764	1188.03	9.06716	1272.31	12.4884	1272.31	12.4884	89.7777
-Spot 83	63.4582	7167.41	2.72323	11.9639	1.2672	2.62405	1.71734	0.227789	1.15908	0.674929	1322.9	13.8625	1307.4	12.6266	1282.04	24.6794	1282.04	24.6794	103.187
-Spot 70	62.649	3497.15	5.06038	11.7488	1.02657	2.72964	1.60357	0.232696	1.23191	0.768229	1348.61	14.991	1336.56	11.9173	1317.3	19.901	1317.3	19.901	102.377
-Spot 5	266.243	77853.7	2.37386	11.7401	0.687993	2.52389	1.56703	0.214995	1.40792	0.898466	1255.38	16.0603	1278.94	11.3966	1318.74	13.3354	1318.74	13.3354	95.195
-Spot 74	65.292	8598.89	1.346	11.7001	0.886267	2.82576	1.43719	0.23989	1.13139	0.787225	1386.13	14.1111	1362.4	10.779	1325.35	17.1624	1325.35	17.1624	104.585
-Spot 222	44.7191	6290.32	2.60805	11.6994	1.02108	2.68307	1.65272	0.227764	1.29957	0.78632	1322.77	15.5413	1323.8	12.2257	1325.46	19.7737	1325.46	19.7737	99.797
-Spot 248	192.389	27949	2.86035	11.6569	0.579416	2.62454	1.4634	0.221986	1.34381	0.918277	1292.36	15.7367	1307.54	10.7599	1332.5	11.2096	1332.5	11.2096	96.9872
-Spot 232	50.2204	6463.58	2.1442	11.6449	1.52587	2.81753	3.56298	0.238064	3.21971	0.903656	1376.62	39.9108	1360.21	26.7072	1334.49	29.5126	1334.49	29.5126	103.157
-Spot 142	213.915	17772.9	3.19027	11.5155	0.633834	2.85231	1.25185	0.238324	1.07953	0.862347	1377.98	13.3933	1369.42	9.41175	1356.07	12.2216	1356.07	12.2216	101.616
-Spot 173	288.023	50823.2	4.55779	11.4925	0.581221	2.7089	1.84472	0.22589	1.75077	0.949068	1312.92	20.7966	1330.9	13.6815	1359.92	11.2013	1359.92	11.2013	96.5438
-Spot 113	70.709	157333	4.11309	11.4817	0.743861	2.77827	1.15659	0.231457	0.885648	0.76574	1342.13	10.7307	1349.71	8.63578	1361.74	14.3319	1361.74	14.3319	98.5597
-Spot 85	300.688	22032	2.06911	11.403	0.692582	2.79503	1.38266	0.231255	1.1967	0.865503	1341.07	14.4893	1354.21	10.3403	1374.99	13.3185	1374.99	13.3185	97.5332
-Spot 139	232.591	103583	3.73782	11.4008	0.678763	2.82065	1.24567	0.23333	1.0445	0.838502	1351.93	12.7385	1361.04	9.33807	1375.36	13.0521	1375.36	13.0521	98.2962
-Spot 249	446.387	70061.5	2.21831	11.3932	0.768932	2.76529	1.51232	0.228599	1.30224	0.861093	1327.15	15.6198	1346.22	11.278	1376.64	14.7834	1376.64	14.7834	96.4056
-Spot 7	82.7518	30019.5	1.75698	11.3055	0.848602	2.8745	1.57046	0.235799	1.32144	0.841438	1364.82	16.2541	1375.25	11.831	1391.47	16.2822	1391.47	16.2822	98.0848
-Spot 165	184.804	35570.3	5.01168	11.2718	0.540831	2.90542	1.63474	0.237625	1.54268	0.943688	1374.34	19.094	1383.32	12.3492	1397.2	10.3688	1397.2	10.3688	98.3638
-Spot 73	134.986	11329.4	2.86164	11.169	0.911995	3.07441	1.61268	0.249152	1.33004	0.824739	1434.1	17.1015	1426.34	12.3566	1414.75	17.4432	1414.75	17.4432	101.368
-Spot 180	406.154	46184.3	5.7619	11.1489	0.74293	2.92031	1.24045	0.236236	0.993359	0.800808	1367.1	12.2369	1387.19	9.38272	1418.2	14.2028	1418.2	14.2028	96.3969
-Spot 191	119.628	14331.3	0.936868	11.0838	0.529727	3.22092	1.03395	0.259034	0.887939	0.858786	1484.9	11.7766	1462.21	8.01143	1429.38	10.1116	1429.38	10.1116	103.884
-Spot 151	139.334	14531.2	4.08337	11.0495	0.692673	3.15852	1.17456	0.253229	0.948577	0.807601	1455.11	12.3559	1447.08	9.05862	1435.3	13.2114	1435.3	13.2114	101.38
-Spot 141	178.323	57921.5	1.45151	10.8567	0.639536	3.19999	1.47148	0.252077	1.32524	0.900614	1449.18	17.1995	1457.16	11.3842	1468.79	12.1429	1468.79	12.1429	98.6648
-Spot 95	125.731	53240.7	2.50921	10.837	0.759445	3.20988	1.5972	0.252399	1.4051	0.879724	1450.83	18.2545	1459.55	12.366	1472.23	14.4131	1472.23	14.4131	98.5465
-Spot 131	664.661	42688.9	3.85358	10.7841	0.596681	3.14305	1.12803	0.245936	0.957301	0.848648	1417.49	12.1813	1443.3	8.68946	1481.52	11.3099	1481.52	11.3099	95.6777
-Spot 29	111.763	74184.7	2.15371	10.7834	0.841725	3.24247	1.42775	0.253698	1.15324	0.807734	1457.52	15.044	1467.38	11.0804	1481.65	15.9545	1481.65	15.9545	98.3717
-Spot 230	121.617	37143.7	1.72939	10.7474	0.773981	3.3712	1.86197	0.26289	1.69348	0.909512	1504.61	22.7253	1497.73	14.582	1487.99	14.658	1487.99	14.658	101.117
-Spot 97	183.545	30379.6	2.09414	10.5094	0.80669	3.50914	1.42026	0.267587	1.16892	0.823036	1528.54	15.9072	1529.27	11.2233	1530.27	15.1902	1530.27	15.1902	99.8874
-Spot 160	109.155	7358.15	3.01686	10.03	1.15462	3.98202	1.51793	0.289795	0.985377	0.649157	1640.5	14.2722	1630.54	12.3198	1617.69	21.4957	1617.69	21.4957	101.41
-Spot 128	87.8919	12917.5	1.06501	9.99221	0.896216	4.04183	1.64702	0.29304	1.38183	0.838991	1656.7	20.1879	1642.66	13.4074	1624.7	16.6692	1624.7	16.6692	101.97
-Spot 221	87.9556	13666	1.48103	9.93479	0.686739	3.90599	1.43251	0.281564	1.25716	0.877598	1599.24	17.8053	1614.92	11.5811	1635.42	12.7566	1635.42	12.7566	97.7876
-Spot 22	398.481	50701.4	2.18841	9.83172	0.70098	3.93562	1.40435	0.280757	1.21689	0.866516	1595.17	17.1963	1621.04	11.3709	1654.77	12.9872	1654.77	12.9872	96.3988
-Spot 55	340.823	146785	13.446	9.12306	0.82154	4.80929	1.64877	0.318353	1.42951	0.867019	1781.68	22.2529	1786.52	13.8604	1792.17	14.9608	1792.17	14.9608	99.415
-Spot 234	70.8818	293872	2.5897	9.04558	1.33022	5.20773	2.05052	0.3418	1.5605	0.761026	1895.33	25.6253	1853.88	17.4684	1807.69	24.1798	1807.69	24.1798	104.848
-Spot 162	267.187	81615.1	3.2159	5.59362	0.548435	12.6751	1.20362	0.514437	1.07141	0.890156	2675.55	23.4615	2655.81	11.3281	2640.81	9.1041	2640.81	9.1041	101.315
-Spot 40	57.0435	15561.4	2.78134	5.34485	0.718946	13.3269	1.52365	0.516835	1.34336	0.881674	2685.74	29.5071	2703.09	14.392	2716.07	11.8545	2716.07	11.8545	98.8834
-Spot 48	95.2041	39456.2	2.13609	5.11515	0.893414	14.4084	1.49982	0.534764	1.20469	0.803222	2761.49	27.0593	2776.99	14.2415	2788.25	14.6305	2788.25	14.6305	99.0406
-Spot 210	161.495	33455.6	3.43012	4.96313	0.665001	12.8561	1.69977	0.462969	1.56429	0.920293	2452.65	31.9121	2669.16	16.0149	2837.55	10.8406	2837.55	10.8406	86.4358

## Sheet: GD Royston
Table _____. U-Pb geochronologic analyses.
							Isotope ratios						Apparent ages (Ma)
Analysis	U	206Pb	U/Th	206Pb*	±	207Pb*	±	206Pb*	±	error	206Pb*	±	207Pb*	±	206Pb*	±	Best age	±	Conc
	(ppm)	204Pb		207Pb*	(%)	235U*	(%)	238U	(%)	corr.	238U*	(Ma)	235U	(Ma)	207Pb*	(Ma)	(Ma)	(Ma)	(%)
Blum GBDS-34 16Oct-Spot 158	719.404	99524.8	3.602	18.7427	0.743938	0.396785	1.62281	0.0539605	1.44225	0.888733	338.791	4.76003	339.314	4.68088	342.915	16.8376	338.791	4.76003	NA
Blum GBDS-34 16Oct-Spot 19	265.55	271494	1.66734	18.3498	0.952012	0.423385	1.41241	0.0563709	1.04334	0.738699	353.517	3.58908	358.469	4.26584	390.622	21.3668	353.517	3.58908	NA
Blum GBDS-34 16Oct-Spot 146	411.658	55721.6	5.39532	18.4629	0.892442	0.449506	1.58293	0.0602175	1.30736	0.825916	376.948	4.78677	376.934	4.98436	376.823	20.0776	376.948	4.78677	NA
Blum GBDS-34 16Oct-Spot 245	421.78	7187.49	5.72524	13.5192	4.54125	0.629374	4.76938	0.0617372	1.45741	0.305576	386.182	5.46297	495.706	18.7081	1039.72	91.7168	386.182	5.46297	NA
Blum GBDS-34 16Oct-Spot 15	451.814	215411	14.2963	18.3764	0.999307	0.480782	1.70637	0.0641056	1.38315	0.810577	400.545	5.37152	398.609	5.62555	387.376	22.4408	400.545	5.37152	103.4
Blum GBDS-34 16Oct-Spot 226	105.952	104381	2.0585	18.1519	1.09823	0.497309	1.57296	0.0654992	1.1261	0.715911	408.983	4.4625	409.879	5.30477	414.912	24.5435	408.983	4.4625	98.5709
Blum GBDS-34 16Oct-Spot 177	669.02	127027	3.23849	18.0719	0.728623	0.501564	1.4029	0.0657686	1.19885	0.854551	410.612	4.76913	412.76	4.75821	424.768	16.2553	410.612	4.76913	96.6675
Blum GBDS-34 16Oct-Spot 299	532.65	917832	3.74913	18.2595	0.68733	0.496966	1.58767	0.065842	1.43118	0.901433	411.056	5.69931	409.647	5.35191	401.688	15.3961	411.056	5.69931	102.332
Blum GBDS-34 16Oct-Spot 31	420.925	57492.4	3.0382	18.1207	0.657782	0.504881	1.17206	0.0663823	0.970073	0.827667	414.323	3.8928	415.001	3.99271	418.75	14.6901	414.323	3.8928	98.9428
Blum GBDS-34 16Oct-Spot 173	119.126	77780.8	2.82633	17.9653	1.20185	0.514313	1.73862	0.0670424	1.25633	0.722603	418.312	5.08851	421.345	5.99586	437.957	26.7551	418.312	5.08851	95.5145
Blum GBDS-34 16Oct-Spot 149	287.88	68452.6	4.41598	18.0644	0.997704	0.516224	1.96194	0.0676628	1.68931	0.861044	422.059	6.90151	422.626	6.78259	425.695	22.2555	422.059	6.90151	99.1459
Blum GBDS-34 16Oct-Spot 151	410.581	764958	46.6605	17.9945	1.01211	0.526507	1.4987	0.0687435	1.10533	0.737523	428.581	4.58318	429.489	5.24873	434.34	22.5635	428.581	4.58318	98.6741
Blum GBDS-34 16Oct-Spot 193	98.6597	16966.1	1.4093	17.6967	1.14997	0.535988	1.66077	0.0688232	1.19821	0.721481	429.062	4.97372	435.776	5.88451	471.423	25.4618	429.062	4.97372	91.0143
Blum GBDS-34 16Oct-Spot 3	214.14	28763.1	1.66462	18.0287	0.817009	0.537509	1.36614	0.0703133	1.09491	0.801464	438.043	4.63685	436.781	4.84949	430.111	18.2103	438.043	4.63685	101.844
Blum GBDS-34 16Oct-Spot 186	218.635	285766	2.31918	17.8358	0.940012	0.54586	1.68669	0.0706419	1.40047	0.830304	440.022	5.95675	442.281	6.04758	454.051	20.865	440.022	5.95675	96.9101
Blum GBDS-34 16Oct-Spot 314	99.5833	26822.6	1.38873	17.7153	1.59764	0.559806	2.43846	0.0719572	1.84217	0.755467	447.937	7.97161	451.4	8.88634	469.071	35.3837	447.937	7.97161	95.4944
Blum GBDS-34 16Oct-Spot 212	650.573	45467.3	3.99842	17.4757	0.810596	0.569979	1.5569	0.0722739	1.32924	0.853772	449.841	5.77561	458.001	5.73933	499.173	17.8317	449.841	5.77561	90.1171
Blum GBDS-34 16Oct-Spot 174	278.955	377969	1.21909	17.7526	0.8876	0.56379	1.36591	0.0726218	1.03821	0.760086	451.932	4.53131	453.991	5.00029	464.449	19.6876	451.932	4.53131	97.3049
Blum GBDS-34 16Oct-Spot 82	274.895	72729.5	2.00616	17.4842	0.980203	0.572553	1.64299	0.0726355	1.31857	0.802542	452.014	5.75598	459.664	6.07409	498.059	21.5925	452.014	5.75598	90.7552
Blum GBDS-34 16Oct-Spot 136	694.028	55841.8	2.48664	17.5178	0.64801	0.577242	1.16386	0.0733713	0.966776	0.830663	456.435	4.2601	462.688	4.32507	493.854	14.2891	456.435	4.2601	92.423
Blum GBDS-34 16Oct-Spot 313	414.642	853925	3.0812	17.7621	0.910018	0.571567	2.03642	0.0736629	1.82178	0.894598	458.186	8.05739	459.028	7.52037	463.267	20.1876	458.186	8.05739	98.9032
Blum GBDS-34 16Oct-Spot 55	167.259	83395.6	1.3476	17.8685	0.972172	0.570775	1.96463	0.0740017	1.70723	0.868985	460.22	7.58312	458.516	7.24884	449.963	21.602	460.22	7.58312	102.279
Blum GBDS-34 16Oct-Spot 34	250.458	78812.6	1.67974	17.773	0.950899	0.577828	1.70496	0.0745155	1.41516	0.830025	463.303	6.3264	463.064	6.33998	461.903	21.0996	463.303	6.3264	100.303
Blum GBDS-34 16Oct-Spot 207	199.764	116078	1.76194	17.6661	0.681429	0.582214	1.34138	0.0746297	1.1554	0.861353	463.988	5.17254	465.883	5.0119	475.231	15.0696	463.988	5.17254	97.6343
Blum GBDS-34 16Oct-Spot 86	297.127	47403.6	1.18945	17.7333	0.828826	0.586555	1.45623	0.0754721	1.19735	0.822227	469.039	5.4166	468.666	5.4666	466.839	18.3672	469.039	5.4166	100.471
Blum GBDS-34 16Oct-Spot 79	118.392	254368	1.51933	17.7173	1.15808	0.590498	1.91527	0.075911	1.52549	0.796487	471.67	6.93834	471.186	7.22026	468.83	25.6604	471.67	6.93834	100.606
Blum GBDS-34 16Oct-Spot 187	272.71	255004	1.75903	17.4632	1.0946	0.600622	2.05857	0.076105	1.74343	0.846913	472.832	7.94841	477.628	7.8436	500.72	24.1025	472.832	7.94841	94.4303
Blum GBDS-34 16Oct-Spot 46	100.06	32628.7	2.40255	17.7481	1.3644	0.591324	1.90588	0.0761491	1.33071	0.698214	473.096	6.07009	471.713	7.19118	464.995	30.2368	473.096	6.07009	101.742
Blum GBDS-34 16Oct-Spot 98	319.065	356736	2.86405	17.4137	0.984296	0.603648	1.49786	0.0762718	1.12905	0.753775	473.831	5.15791	479.546	5.72508	506.95	21.6645	473.831	5.15791	93.467
Blum GBDS-34 16Oct-Spot 51	294.289	114808	2.09724	17.5956	1.02112	0.60149	1.76927	0.076793	1.44486	0.816643	476.952	6.64255	478.179	6.74738	484.091	22.5489	476.952	6.64255	98.5253
Blum GBDS-34 16Oct-Spot 72	472.162	81152.2	29.7715	17.5954	0.860253	0.631139	1.68996	0.0805771	1.45462	0.860743	499.566	6.99235	496.805	6.63965	484.123	19.0025	499.566	6.99235	103.19
Blum GBDS-34 16Oct-Spot 227	285.101	123127	1.12893	17.4172	0.81986	0.647999	1.32506	0.0818918	1.04097	0.785601	507.405	5.0794	507.246	5.29038	506.509	18.0261	507.405	5.0794	100.177
Blum GBDS-34 16Oct-Spot 77	296.42	24594.3	2.8551	17.247	0.933229	0.654885	1.5501	0.0819533	1.2377	0.798464	507.771	6.04355	511.48	6.22864	528.115	20.453	507.771	6.04355	96.1477
Blum GBDS-34 16Oct-Spot 135	146.418	115397	2.28564	17.3778	1.03597	0.66844	1.41006	0.0842839	0.956572	0.678393	521.643	4.79333	519.763	5.73618	511.515	22.7782	521.643	4.79333	101.98
Blum GBDS-34 16Oct-Spot 134	135.197	104565	1.09604	17.0479	0.966367	0.684084	1.54561	0.084619	1.20625	0.780437	523.634	6.06661	529.24	6.375	553.479	21.0922	523.634	6.06661	94.6078
Blum GBDS-34 16Oct-Spot 121	418.816	99317.2	4.03592	16.473	1.7113	0.724558	2.3606	0.086603	1.62601	0.688811	535.416	8.35418	553.354	10.0708	627.855	36.8742	535.416	8.35418	85.277
Blum GBDS-34 16Oct-Spot 10	289.231	226184	2.71555	17.1517	0.723876	0.698839	1.5118	0.0869706	1.32723	0.877914	537.596	6.84571	538.097	6.31472	540.209	15.8373	537.596	6.84571	99.5163
Blum GBDS-34 16Oct-Spot 178	268.312	55168.4	2.84069	17.2318	0.926673	0.696364	1.56506	0.0870671	1.26123	0.805865	538.168	6.51193	536.617	6.52356	530.051	20.2839	538.168	6.51193	101.531
Blum GBDS-34 16Oct-Spot 302	106.54	84148.4	4.76932	16.8969	0.991794	0.712967	1.61539	0.0874108	1.27509	0.789334	540.206	6.60738	546.506	6.82709	572.878	21.5934	540.206	6.60738	94.2969
Blum GBDS-34 16Oct-Spot 184	517.298	157665	0.891672	16.8136	0.703925	0.718928	1.22836	0.0877067	1.00666	0.819515	541.96	5.23267	550.034	5.21661	583.591	15.2708	541.96	5.23267	92.8664
Blum GBDS-34 16Oct-Spot 292	208.285	1.97622e+06	3.91087	16.8381	0.993313	0.731638	1.48104	0.0893874	1.09855	0.741743	551.913	5.81077	557.514	6.35393	580.451	21.5735	551.913	5.81077	95.0835
Blum GBDS-34 16Oct-Spot 262	893.707	517064	10.4923	17.0105	0.69494	0.744415	1.3749	0.0918796	1.18635	0.862858	566.644	6.43538	564.979	5.95762	558.302	15.1501	566.644	6.43538	101.494
Blum GBDS-34 16Oct-Spot 266	172.966	76490.7	4.17605	16.8875	0.823248	0.761934	1.61565	0.0933621	1.39018	0.860444	575.391	7.65236	575.125	7.09435	574.059	17.8967	575.391	7.65236	100.232
Blum GBDS-34 16Oct-Spot 61	129.87	57471.1	1.0918	16.6679	1.09967	0.801684	2.49964	0.0969556	2.24475	0.898032	596.543	12.79	597.778	11.294	602.447	23.79	596.543	12.79	99.0199
Blum GBDS-34 16Oct-Spot 88	113.424	24757.9	1.69404	16.8702	1.10433	0.792331	1.5685	0.0969873	1.11384	0.710132	596.729	6.34826	592.493	7.0406	576.325	24.0056	596.729	6.34826	103.54
Blum GBDS-34 16Oct-Spot 286	247.308	548309	5.30237	16.4445	0.872978	0.812876	2.02793	0.0969914	1.83041	0.902601	596.753	10.4327	604.066	9.23316	631.621	18.8011	596.753	10.4327	94.4797
Blum GBDS-34 16Oct-Spot 138	604.361	102188	3.68339	16.2717	0.850701	0.824412	1.46366	0.0973343	1.19105	0.81375	598.768	6.81046	610.507	6.7158	654.288	18.2406	598.768	6.81046	91.5144
Blum GBDS-34 16Oct-Spot 304	165.764	128066	3.85552	16.5812	0.89887	0.811346	1.28025	0.0976133	0.911626	0.712071	600.407	5.2263	603.209	5.82281	613.73	19.4373	600.407	5.2263	97.8291
Blum GBDS-34 16Oct-Spot 221	234.496	72799.1	3.41013	16.2146	0.941003	0.844472	1.56048	0.0993524	1.24483	0.797725	610.613	7.25222	621.611	7.25452	661.834	20.1451	610.613	7.25222	92.2607
Blum GBDS-34 16Oct-Spot 54	162.475	79801.2	6.4376	16.6801	0.857345	0.828976	1.27917	0.10033	0.949328	0.742147	616.34	5.58008	613.044	5.88702	600.866	18.5607	616.34	5.58008	102.575
Blum GBDS-34 16Oct-Spot 244	178.789	49618.6	2.24755	16.3518	1.08782	0.864646	1.73262	0.102587	1.34857	0.778339	629.552	8.08856	632.656	8.15803	643.784	23.382	629.552	8.08856	97.7893
Blum GBDS-34 16Oct-Spot 49	452.211	3.23699e+06	79.285	16.4567	0.97177	0.859955	1.99722	0.102685	1.74487	0.873647	630.125	10.4746	630.098	9.37652	630.023	20.956	630.125	10.4746	100.016
Blum GBDS-34 16Oct-Spot 315	152.92	453264	0.781639	16.3244	1.11447	0.904428	1.48146	0.107127	0.976052	0.658844	656.042	6.08826	654.091	7.14392	647.387	23.9613	656.042	6.08826	101.337
Blum GBDS-34 16Oct-Spot 293	274.071	639564	5.8495	15.216	0.872125	0.994991	2.53975	0.109852	2.38531	0.939193	671.888	15.2197	701.264	12.8624	796.547	18.3028	671.888	15.2197	84.3501
Blum GBDS-34 16Oct-Spot 235	210.518	287174	1.37786	15.7316	1.12521	0.977835	1.66795	0.111616	1.23124	0.738178	682.128	7.96957	692.494	8.37333	726.285	23.8598	682.128	7.96957	93.9201
Blum GBDS-34 16Oct-Spot 59	106.42	46832.5	3.3161	15.6502	0.916769	1.00345	1.27759	0.113946	0.88981	0.696477	695.626	5.86748	705.558	6.49745	737.286	19.4044	695.626	5.86748	94.3495
Blum GBDS-34 16Oct-Spot 254	200.665	92244	4.80542	16.0706	0.940222	0.986289	1.89541	0.115007	1.64577	0.868293	701.761	10.943	696.825	9.55669	680.915	20.1059	701.761	10.943	103.061
Blum GBDS-34 16Oct-Spot 107	368.246	734128	3.22916	16.1066	0.693747	0.987524	1.33308	0.115409	1.13834	0.853916	704.083	7.59265	697.456	6.72553	676.149	14.8396	704.083	7.59265	104.131
Blum GBDS-34 16Oct-Spot 89	149.314	51315.6	2.35411	15.5744	0.936807	1.02576	1.68521	0.115916	1.40083	0.83125	707.014	9.38029	716.803	8.66466	747.548	19.7751	707.014	9.38029	94.5777
Blum GBDS-34 16Oct-Spot 124	14.4318	4652.72	107142	15.3785	3.82193	1.05921	4.04191	0.118192	1.31525	0.325402	720.147	8.96182	733.436	21.1136	774.231	80.4191	720.147	8.96182	93.0145
Blum GBDS-34 16Oct-Spot 258	208.765	91084	0.980423	14.8054	1.33179	1.19005	3.82591	0.127841	3.58664	0.937459	775.539	26.2078	795.982	21.1124	853.642	27.6688	775.539	26.2078	90.8507
Blum GBDS-34 16Oct-Spot 198	238.782	76570.1	2.8295	14.9416	0.82286	1.23915	1.1973	0.134341	0.869729	0.726408	812.582	6.63999	818.498	6.72791	834.629	17.1471	812.582	6.63999	97.3585
Blum GBDS-34 16Oct-Spot 194	332.364	690260	24.5807	14.7594	0.875886	1.26961	1.55576	0.135965	1.28578	0.82646	821.803	9.92076	832.216	8.83696	860.1	18.1734	821.803	9.92076	95.5473
Blum GBDS-34 16Oct-Spot 28	375.966	79427.7	2.8756	14.4139	0.874556	1.40669	2.27743	0.147119	2.10282	0.923329	884.794	17.3853	891.764	13.517	909.068	18.005	884.794	17.3853	97.3298
Blum GBDS-34 16Oct-Spot 101	55.0882	59776.4	3.79696	14.4365	1.06766	1.42148	1.51042	0.148899	1.06839	0.707349	894.787	8.92603	897.984	9.00323	905.84	21.9871	905.84	21.9871	98.7798
Blum GBDS-34 16Oct-Spot 182	193.391	174739	6.98374	14.3276	0.839691	1.44696	1.36416	0.150424	1.0751	0.788107	903.341	9.06207	908.614	8.19094	921.47	17.2801	921.47	17.2801	98.0326
Blum GBDS-34 16Oct-Spot 97	283.963	253485	5.105	14.2022	0.792802	1.48876	1.34192	0.153415	1.08268	0.806819	920.08	9.28331	925.81	8.1509	939.503	16.2505	939.503	16.2505	97.9327
Blum GBDS-34 16Oct-Spot 78	134.231	51681.9	2.8802	14.124	0.971585	1.55512	1.51289	0.159371	1.15968	0.766534	953.28	10.2765	952.529	9.34981	950.777	19.887	950.777	19.887	100.263
Blum GBDS-34 16Oct-Spot 234	107.301	195305	3.35033	14.1167	0.753153	1.51906	1.28859	0.155595	1.04557	0.811408	932.251	9.0753	938.098	7.89021	951.846	15.4283	951.846	15.4283	97.9413
Blum GBDS-34 16Oct-Spot 130	294.389	3.17514e+06	11.2716	14.0756	0.703124	1.58803	1.33025	0.162186	1.12924	0.848892	968.914	10.1588	965.524	8.28823	957.794	14.3639	957.794	14.3639	101.161
Blum GBDS-34 16Oct-Spot 76	128.625	400922	4.88028	14.0755	0.820311	1.60489	1.36063	0.163907	1.08555	0.797825	978.453	9.85478	972.119	8.51211	957.81	16.7681	957.81	16.7681	102.155
Blum GBDS-34 16Oct-Spot 44	89.2506	162621	4.55312	14.0743	0.972333	1.56359	1.5324	0.159675	1.18441	0.77291	954.972	10.5129	955.89	9.4905	958.023	19.8754	958.023	19.8754	99.6815
Blum GBDS-34 16Oct-Spot 308	174.348	79276.6	0.973648	13.9219	0.851883	1.68526	1.71737	0.170237	1.49119	0.8683	1013.41	13.984	1002.97	10.9444	980.237	17.3347	980.237	17.3347	103.385
Blum GBDS-34 16Oct-Spot 38	58.6891	88878.4	4.5482	13.8904	0.855745	1.65796	1.48345	0.1671	1.21175	0.816843	996.114	11.1841	992.595	9.39597	984.846	17.4027	984.846	17.4027	101.144
Blum GBDS-34 16Oct-Spot 233	93.2945	25435.8	683.788	13.8747	0.812208	1.62139	1.38277	0.16323	1.11909	0.809312	974.701	10.1232	978.53	8.6845	987.114	16.5266	987.114	16.5266	98.7425
Blum GBDS-34 16Oct-Spot 22	80.5759	40843.8	4.37294	13.8554	0.799991	1.68056	1.54323	0.168951	1.31968	0.855145	1006.33	12.2957	1001.19	9.82431	989.954	16.2719	989.954	16.2719	101.654
Blum GBDS-34 16Oct-Spot 220	227.809	128007	3.46096	13.8537	0.755124	1.59676	1.44401	0.160506	1.23083	0.852371	959.589	10.9739	968.942	9.01608	990.231	15.3521	990.231	15.3521	96.9056
Blum GBDS-34 16Oct-Spot 62	211.645	133618	8.43601	13.8401	0.79358	1.70446	1.47314	0.171164	1.24112	0.842499	1018.52	11.6931	1010.21	9.42743	992.235	16.1306	992.235	16.1306	102.649
Blum GBDS-34 16Oct-Spot 181	38.8572	24982.8	3.61657	13.7835	1.03106	1.7349	1.52182	0.173509	1.1193	0.735505	1031.41	10.6684	1021.57	9.80254	1000.53	20.9187	1000.53	20.9187	103.087
Blum GBDS-34 16Oct-Spot 250	128.299	105836	1.78193	13.7547	0.747171	1.68262	1.29325	0.167928	1.05557	0.816217	1000.69	9.78395	1001.97	8.23662	1004.77	15.1448	1004.77	15.1448	99.5936
Blum GBDS-34 16Oct-Spot 270	140.851	103408	3.2583	13.7495	0.878435	1.69412	1.52811	0.169012	1.25039	0.818259	1006.67	11.6537	1006.32	9.75721	1005.54	17.8242	1005.54	17.8242	100.112
Blum GBDS-34 16Oct-Spot 83	741.993	101129	6.83008	13.7345	0.892651	1.70614	1.45318	0.170026	1.1467	0.789094	1012.26	10.7421	1010.84	9.30308	1007.75	18.0966	1007.75	18.0966	100.447
Blum GBDS-34 16Oct-Spot 26	245.356	115513	4.3523	13.7104	0.777505	1.71166	1.40782	0.170277	1.17365	0.833662	1013.64	11.0084	1012.91	9.02344	1011.31	15.7631	1011.31	15.7631	100.231
Blum GBDS-34 16Oct-Spot 39	131.025	649912	4.62513	13.6943	0.937586	1.76798	1.35008	0.175672	0.971412	0.719523	1043.29	9.35705	1033.78	8.75615	1013.7	18.9945	1013.7	18.9945	102.919
Blum GBDS-34 16Oct-Spot 11	408.169	97754.1	6.40937	13.6837	0.840362	1.71543	1.70104	0.17032	1.47896	0.869446	1013.88	13.8751	1014.32	10.9118	1015.26	17.0276	1015.26	17.0276	99.8641
Blum GBDS-34 16Oct-Spot 52	100.588	31653.7	2.0256	13.6766	0.929923	1.65344	1.77018	0.164079	1.50624	0.8509	979.405	13.6863	990.868	11.2007	1016.32	18.8386	1016.32	18.8386	96.368
Blum GBDS-34 16Oct-Spot 129	521.115	176110	2.69975	13.6677	0.7694	1.75656	1.5226	0.174199	1.3139	0.862933	1035.21	12.5657	1029.58	9.85202	1017.63	15.583	1017.63	15.583	101.727
Blum GBDS-34 16Oct-Spot 157	575.165	385368	4.28111	13.6476	0.892436	1.67509	1.5648	0.165876	1.28536	0.821423	989.348	11.789	999.121	9.94954	1020.61	18.0678	1020.61	18.0678	96.9367
Blum GBDS-34 16Oct-Spot 75	49.0822	22028.7	2.3677	13.6459	1.00872	1.68698	1.55826	0.167032	1.18771	0.762204	995.739	10.9584	1003.62	9.9341	1020.86	20.4202	1020.86	20.4202	97.5395
Blum GBDS-34 16Oct-Spot 196	101.709	49571.9	0.786443	13.6349	0.924877	1.68768	1.36257	0.166967	1.00059	0.734345	995.38	9.22888	1003.89	8.68782	1022.49	18.719	1022.49	18.719	97.3484
Blum GBDS-34 16Oct-Spot 140	207.276	96228.5	2.15405	13.5894	0.952069	1.83141	1.97665	0.180581	1.73225	0.876359	1070.15	17.0808	1056.79	12.9827	1029.26	19.2679	1029.26	19.2679	103.973
Blum GBDS-34 16Oct-Spot 225	384.55	111110	2.95435	13.5729	0.854036	1.70972	1.68496	0.168379	1.45248	0.862029	1003.17	13.4938	1012.18	10.7953	1031.71	17.2802	1031.71	17.2802	97.234
Blum GBDS-34 16Oct-Spot 4	460.03	166812	8.10609	13.5715	0.661776	1.74097	1.49708	0.171438	1.34287	0.896992	1020.03	12.6689	1023.82	9.65547	1031.92	13.3934	1031.92	13.3934	98.8482
Blum GBDS-34 16Oct-Spot 164	69.4134	87852.7	4.26966	13.568	0.768935	1.68692	1.39733	0.166072	1.16673	0.834974	990.431	10.7117	1003.6	8.90797	1032.45	15.5587	1032.45	15.5587	95.9302
Blum GBDS-34 16Oct-Spot 199	253.551	71712.7	7.50753	13.5623	0.870014	1.70699	1.25709	0.167978	0.907382	0.721814	1000.96	8.41253	1011.16	8.04912	1033.29	17.5987	1033.29	17.5987	96.8715
Blum GBDS-34 16Oct-Spot 56	292.552	7.99734e+06	1.99271	13.5501	0.74262	1.8237	1.37132	0.179302	1.15283	0.840676	1063.16	11.2991	1054.02	8.99319	1035.11	15.0211	1035.11	15.0211	102.71
Blum GBDS-34 16Oct-Spot 190	55.8914	15631.5	1.78733	13.5379	1.13352	1.73596	1.72908	0.170521	1.3057	0.755141	1014.98	12.262	1021.96	11.1402	1036.93	22.9114	1036.93	22.9114	97.8833
Blum GBDS-34 16Oct-Spot 239	278.876	95527	2.46972	13.5367	1.02203	1.69937	1.51384	0.166912	1.11677	0.737702	995.076	10.2975	1008.29	9.67719	1037.11	20.6591	1037.11	20.6591	95.9474
Blum GBDS-34 16Oct-Spot 257	214.966	1.31207e+06	7.43668	13.5322	0.765439	1.73318	1.33826	0.170176	1.09775	0.820278	1013.08	10.2913	1020.93	8.61702	1037.78	15.4752	1037.78	15.4752	97.6195
Blum GBDS-34 16Oct-Spot 287	72.6779	56011.3	1.41741	13.4876	0.852109	1.79397	1.33014	0.175565	1.02136	0.767861	1042.7	9.83307	1043.27	8.67222	1044.48	17.208	1044.48	17.208	99.8298
Blum GBDS-34 16Oct-Spot 117	164.954	65041.7	3.44989	13.4855	0.884796	1.82867	1.4398	0.178933	1.13585	0.788894	1061.14	11.1132	1055.8	9.4514	1044.79	17.867	1044.79	17.867	101.565
Blum GBDS-34 16Oct-Spot 64	71.6069	61605.7	4.88364	13.4731	1.06265	1.58816	1.48236	0.155256	1.03352	0.697211	930.359	8.95375	965.575	9.23628	1046.65	21.4474	1046.65	21.4474	88.8889
Blum GBDS-34 16Oct-Spot 166	62.8021	41529.7	1.40934	13.4684	0.959713	1.75529	1.50085	0.171536	1.15391	0.768836	1020.57	10.8915	1029.11	9.70872	1047.35	19.3707	1047.35	19.3707	97.4431
Blum GBDS-34 16Oct-Spot 100	97.9876	86284.4	2.38889	13.4646	0.88585	1.8383	1.59196	0.179596	1.32273	0.83088	1064.77	12.9824	1059.25	10.4697	1047.92	17.8789	1047.92	17.8789	101.608
Blum GBDS-34 16Oct-Spot 274	35.1913	94864	2.62508	13.4524	1.04533	1.72301	1.58716	0.16818	1.1943	0.752477	1002.07	11.084	1017.15	10.1977	1049.76	21.0891	1049.76	21.0891	95.4576
Blum GBDS-34 16Oct-Spot 248	593.079	1.53688e+06	4.35797	13.4367	0.697224	1.82433	1.29332	0.177863	1.08929	0.842244	1055.29	10.6036	1054.24	8.4827	1052.1	14.0669	1052.1	14.0669	100.304
Blum GBDS-34 16Oct-Spot 269	318.469	79109.2	7.53783	13.4035	0.740394	1.75226	1.86465	0.170414	1.71136	0.917789	1014.39	16.0629	1028	12.0547	1057.09	14.9267	1057.09	14.9267	95.9605
Blum GBDS-34 16Oct-Spot 53	265.589	140159	6.49924	13.4014	0.83639	1.84445	1.50164	0.179352	1.24715	0.830524	1063.44	12.2265	1061.45	9.88734	1057.4	16.8578	1057.4	16.8578	100.571
Blum GBDS-34 16Oct-Spot 256	185.544	124862	3.39453	13.3971	0.77639	1.83769	1.32883	0.178637	1.07843	0.811561	1059.52	10.5366	1059.04	8.7381	1058.05	15.6488	1058.05	15.6488	100.139
Blum GBDS-34 16Oct-Spot 113	78.9425	102989	4.92863	13.3957	1.09488	1.85034	1.68917	0.179848	1.28629	0.761492	1066.14	12.6397	1063.55	11.1346	1058.26	22.05	1058.26	22.05	100.745
Blum GBDS-34 16Oct-Spot 161	129.978	105504	5.07224	13.3665	0.809375	1.90283	1.38409	0.184546	1.12278	0.811199	1091.76	11.2762	1082.08	9.21267	1062.66	16.2676	1062.66	16.2676	102.739
Blum GBDS-34 16Oct-Spot 2	329.956	299263	2.86086	13.3347	0.792226	1.82592	1.60955	0.176666	1.40108	0.87048	1048.73	13.5607	1054.81	10.5602	1067.44	15.9175	1067.44	15.9175	98.2481
Blum GBDS-34 16Oct-Spot 108	133.184	23010	0.949442	13.2873	0.916537	1.85779	2.01497	0.179111	1.79446	0.890561	1062.11	17.5719	1066.2	13.3012	1074.6	18.4058	1074.6	18.4058	98.8386
Blum GBDS-34 16Oct-Spot 260	367.499	518738	6.82723	13.281	0.753609	1.76782	1.42851	0.170356	1.21356	0.849525	1014.07	11.3873	1033.72	9.26459	1075.51	15.1125	1075.51	15.1125	94.2881
Blum GBDS-34 16Oct-Spot 203	229.006	116750	4.37001	13.2726	0.737713	1.77057	1.49902	0.170513	1.30492	0.870521	1014.93	12.2542	1034.73	9.72732	1076.81	14.8096	1076.81	14.8096	94.2537
Blum GBDS-34 16Oct-Spot 13	154.942	92769.1	1.48056	13.2683	0.910123	1.76341	1.60686	0.169768	1.32426	0.824131	1010.83	12.3894	1032.1	10.4119	1077.43	18.2495	1077.43	18.2495	93.8193
Blum GBDS-34 16Oct-Spot 208	90.7457	34524.4	2.24475	13.2628	0.974611	1.83165	1.38705	0.176265	0.98693	0.711533	1046.54	9.53381	1056.87	9.11036	1078.29	19.5551	1078.29	19.5551	97.0553
Blum GBDS-34 16Oct-Spot 283	137.67	45976.2	3.20099	13.2491	0.747721	1.94379	1.37337	0.186863	1.15198	0.838798	1104.36	11.6919	1096.31	9.20813	1080.36	15.0011	1080.36	15.0011	102.221
Blum GBDS-34 16Oct-Spot 201	110.896	36048.2	0.921253	13.2438	0.728085	1.78453	1.22213	0.171485	0.981573	0.803168	1020.29	9.26254	1039.83	7.95293	1081.13	14.5867	1081.13	14.5867	94.3719
Blum GBDS-34 16Oct-Spot 240	409.125	3.60799e+06	0.729356	13.2004	0.712826	1.90502	1.21765	0.182463	0.987197	0.810737	1080.41	9.81993	1082.84	8.10798	1087.73	14.2808	1087.73	14.2808	99.327
Blum GBDS-34 16Oct-Spot 160	51.2571	984926	1.75113	13.1638	0.883188	1.92749	1.58873	0.184103	1.32062	0.831243	1089.35	13.2363	1090.67	10.6216	1093.32	17.6794	1093.32	17.6794	99.6372
Blum GBDS-34 16Oct-Spot 17	120.622	342752	2.64953	13.081	0.87378	1.83029	1.56922	0.17372	1.30345	0.830631	1032.57	12.4365	1056.38	10.3043	1105.9	17.4653	1105.9	17.4653	93.3697
Blum GBDS-34 16Oct-Spot 183	78.949	503659	2.8069	13.0706	0.99977	1.80729	1.87709	0.171399	1.58869	0.846357	1019.82	14.9852	1048.1	12.2709	1107.5	19.9648	1107.5	19.9648	92.0826
Blum GBDS-34 16Oct-Spot 290	70.7928	21907.9	3.55093	13.0667	1.11215	2.07257	1.5821	0.196501	1.12524	0.711229	1156.49	11.9128	1139.78	10.8365	1108.08	22.2315	1108.08	22.2315	104.369
Blum GBDS-34 16Oct-Spot 171	152.746	41324	3.63502	13.0632	0.831793	1.81009	1.3237	0.171569	1.0297	0.777901	1020.75	9.72078	1049.11	8.65783	1108.63	16.6004	1108.63	16.6004	92.073
Blum GBDS-34 16Oct-Spot 128	77.1616	26806.7	2.76376	13.0431	0.907023	1.95904	1.38551	0.1854	1.04735	0.755933	1096.41	10.5598	1101.55	9.31417	1111.71	18.1074	1111.71	18.1074	98.6238
Blum GBDS-34 16Oct-Spot 175	64.827	27215.2	2.39403	13.0282	0.962528	2.00211	1.43877	0.189261	1.06939	0.743267	1117.37	10.9708	1116.23	9.74306	1114.02	19.2073	1114.02	19.2073	100.301
Blum GBDS-34 16Oct-Spot 144	91.054	38972.6	3.76473	12.9829	1.10614	1.89246	1.74791	0.178273	1.35338	0.774286	1057.54	13.2002	1078.44	11.6125	1120.96	22.0796	1120.96	22.0796	94.3416
Blum GBDS-34 16Oct-Spot 206	257.081	98349.6	5.06915	12.9821	0.940885	1.99219	1.68093	0.187656	1.39293	0.828668	1108.66	14.188	1112.86	11.3642	1121.07	18.752	1121.07	18.752	98.8938
Blum GBDS-34 16Oct-Spot 154	148.295	117215	4.50245	12.9643	0.939428	2.04695	1.6216	0.19255	1.32176	0.815099	1135.17	13.7575	1131.28	11.062	1123.81	18.7327	1123.81	18.7327	101.011
Blum GBDS-34 16Oct-Spot 33	60.5047	30234.3	3.60638	12.8693	0.967282	2.00706	1.47274	0.187414	1.11056	0.754074	1107.35	11.2995	1117.9	9.98135	1138.46	19.2285	1138.46	19.2285	97.2674
Blum GBDS-34 16Oct-Spot 102	781.138	1.03215e+06	4.54045	12.8662	0.865689	1.87236	1.42231	0.174794	1.12852	0.793441	1038.47	10.8241	1071.36	9.4143	1138.92	17.2196	1138.92	17.2196	91.1804
Blum GBDS-34 16Oct-Spot 126	130.127	57902.1	4.74734	12.8652	0.808144	2.03631	1.37783	0.190085	1.11594	0.809925	1121.84	11.4903	1127.73	9.38289	1139.07	16.0708	1139.07	16.0708	98.4869
Blum GBDS-34 16Oct-Spot 311	90.5855	448807	4.31723	12.8638	0.995901	2.05946	1.62053	0.192224	1.27839	0.788875	1133.41	13.2872	1135.44	11.0767	1139.33	19.789	1139.33	19.789	99.4806
Blum GBDS-34 16Oct-Spot 91	727.28	390679	5.37374	12.8304	0.915063	1.8678	1.61991	0.173884	1.3367	0.82517	1033.47	12.764	1069.75	10.7132	1144.47	18.1739	1144.47	18.1739	90.3013
Blum GBDS-34 16Oct-Spot 145	83.9847	2.01634e+06	2.88461	12.8173	0.975549	2.00163	1.31233	0.186152	0.877792	0.66888	1100.49	8.88049	1116.06	8.88611	1146.53	19.3823	1146.53	19.3823	95.9846
Blum GBDS-34 16Oct-Spot 143	46.5359	4.10156e+06	1.30114	12.8092	1.34426	1.85535	1.64448	0.172439	0.947249	0.576016	1025.54	8.98109	1065.33	10.8503	1147.74	26.7107	1147.74	26.7107	89.3528
Blum GBDS-34 16Oct-Spot 25	870.823	87415.3	7.54389	12.8086	0.860231	1.65953	2.68765	0.154232	2.54626	0.947395	924.642	21.9333	993.197	17.0303	1147.88	17.076	1147.88	17.076	80.5524
Blum GBDS-34 16Oct-Spot 150	15.1601	14676.5	3.10498	12.7993	1.37586	2.01831	1.79048	0.18744	1.1458	0.639937	1107.49	11.6594	1121.69	12.1575	1149.27	27.3245	1149.27	27.3245	96.3647
Blum GBDS-34 16Oct-Spot 137	121.053	108582	3.90809	12.7871	0.924992	2.0697	1.48611	0.192029	1.16315	0.78268	1132.36	12.0791	1138.83	10.1744	1151.17	18.3844	1151.17	18.3844	98.3663
Blum GBDS-34 16Oct-Spot 261	143.612	49419.3	4.56255	12.7798	0.683498	2.07153	1.13346	0.192089	0.904189	0.797726	1132.68	9.39228	1139.44	7.76212	1152.31	13.5681	1152.31	13.5681	98.2963
Blum GBDS-34 16Oct-Spot 279	433.435	138765	6.11881	12.7311	0.866634	1.891	2.06024	0.17468	1.8691	0.907224	1037.85	17.9174	1077.93	13.6841	1159.89	17.1853	1159.89	17.1853	89.4782
Blum GBDS-34 16Oct-Spot 251	421.366	97059.2	8.48438	12.7208	0.970065	1.91962	1.43781	0.177182	1.06126	0.738108	1051.56	10.2971	1087.94	9.59917	1161.49	19.2503	1161.49	19.2503	90.5358
Blum GBDS-34 16Oct-Spot 211	138.09	115934	3.3866	12.7086	1.2284	2.05146	1.8216	0.189169	1.34508	0.738408	1116.87	13.7935	1132.78	12.4354	1163.38	24.3402	1163.38	24.3402	96.0019
Blum GBDS-34 16Oct-Spot 84	203.715	425618	6.20717	12.699	0.865197	2.12505	1.4463	0.195807	1.15897	0.801336	1152.76	12.2337	1156.98	9.98652	1164.88	17.1626	1164.88	17.1626	98.9593
Blum GBDS-34 16Oct-Spot 282	70.1338	53539.2	3.649	12.6846	0.978859	2.07722	1.50773	0.191182	1.14678	0.760596	1127.77	11.865	1141.32	10.3346	1167.14	19.4084	1167.14	19.4084	96.6275
Blum GBDS-34 16Oct-Spot 179	875.728	132056	30.0256	12.6767	0.694025	2.04508	1.23576	0.188107	1.02246	0.827396	1111.11	10.4355	1130.66	8.42722	1168.4	13.7641	1168.4	13.7641	95.0971
Blum GBDS-34 16Oct-Spot 66	134.881	63540.3	2.9953	12.675	0.85393	2.19007	1.51504	0.201416	1.25146	0.826023	1182.92	13.5249	1177.89	10.5615	1168.67	16.9295	1168.67	16.9295	101.22
Blum GBDS-34 16Oct-Spot 167	161.648	33842.8	3.46558	12.6571	0.98459	2.0083	1.7452	0.184438	1.44094	0.825658	1091.17	14.4644	1118.32	11.8305	1171.47	19.5086	1171.47	19.5086	93.1455
Blum GBDS-34 16Oct-Spot 268	164.998	182085	2.72023	12.6371	0.635439	2.19732	1.35666	0.201478	1.19864	0.883524	1183.26	12.9574	1180.19	9.46716	1174.6	12.5914	1174.6	12.5914	100.737
Blum GBDS-34 16Oct-Spot 81	94.1583	50096.5	2.64923	12.6333	0.838703	2.20586	1.56106	0.2022	1.31661	0.843413	1187.13	14.2752	1182.9	10.9068	1175.19	16.6127	1175.19	16.6127	101.016
Blum GBDS-34 16Oct-Spot 165	92.6949	106330	4.22597	12.6239	0.97575	2.18805	1.49524	0.200419	1.13298	0.757726	1177.57	12.194	1177.24	10.4205	1176.66	19.3191	1176.66	19.3191	100.078
Blum GBDS-34 16Oct-Spot 192	134.125	93723.2	10.1615	12.6062	0.802692	2.15264	1.4015	0.196898	1.14887	0.81974	1158.64	12.1835	1165.9	9.71704	1179.44	15.876	1179.44	15.876	98.2357
Blum GBDS-34 16Oct-Spot 216	214.03	244491	4.25527	12.5882	0.750124	2.19111	1.32741	0.200131	1.09515	0.825021	1176.03	11.7727	1178.22	9.25487	1182.26	14.835	1182.26	14.835	99.4724
Blum GBDS-34 16Oct-Spot 243	51.042	18564	1.79137	12.5775	0.974954	2.21242	1.52921	0.201906	1.17811	0.770404	1185.55	12.758	1184.98	10.6942	1183.95	19.2659	1183.95	19.2659	100.135
Blum GBDS-34 16Oct-Spot 191	111.667	40581.8	4.12247	12.5315	1.08315	1.90621	1.31337	0.173325	0.742784	0.565555	1030.4	7.07332	1083.26	8.74726	1191.15	21.3806	1191.15	21.3806	86.5049
Blum GBDS-34 16Oct-Spot 141	229.891	2.78341e+06	2.73376	12.5148	0.736419	2.24994	1.95696	0.204306	1.81311	0.926494	1198.41	19.8284	1196.77	13.7573	1193.78	14.5308	1193.78	14.5308	100.388
Blum GBDS-34 16Oct-Spot 236	165.04	66096.1	6.94394	12.5123	0.807487	2.20776	1.66766	0.200437	1.45913	0.874956	1177.67	15.7055	1183.5	11.6549	1194.17	15.9216	1194.17	15.9216	98.6183
Blum GBDS-34 16Oct-Spot 237	229.576	605692	3.4789	12.5017	0.938374	1.89835	1.90993	0.172201	1.66352	0.870983	1024.23	15.7536	1080.51	12.7027	1195.85	18.5036	1195.85	18.5036	85.6486
Blum GBDS-34 16Oct-Spot 273	287.09	289315	5.12296	12.4715	0.81872	2.2349	1.37501	0.202239	1.1047	0.803409	1187.33	11.9794	1192.06	9.646	1200.61	16.1211	1200.61	16.1211	98.8941
Blum GBDS-34 16Oct-Spot 246	61.1048	202017	2.17309	12.4713	1.02843	2.2568	1.46022	0.204217	1.03662	0.709906	1197.94	11.3325	1198.91	10.2746	1200.65	20.253	1200.65	20.253	99.7743
Blum GBDS-34 16Oct-Spot 188	141.379	64639.4	0.851166	12.4537	0.876938	2.20388	1.52347	0.199147	1.24576	0.817717	1170.74	13.3369	1182.27	10.6412	1203.43	17.2613	1203.43	17.2613	97.2832
Blum GBDS-34 16Oct-Spot 259	186.134	64505.9	6.75736	12.4378	0.617473	2.32363	0.960779	0.2097	0.736087	0.766135	1227.22	8.22561	1219.53	6.82047	1205.98	12.1696	1205.98	12.1696	101.761
Blum GBDS-34 16Oct-Spot 205	260.079	136092	5.21985	12.4246	0.825447	2.15433	1.65221	0.194214	1.43124	0.866256	1144.16	15.0048	1166.45	11.4583	1208.05	16.2352	1208.05	16.2352	94.7115
Blum GBDS-34 16Oct-Spot 7	96.9028	188242	4.56661	12.3528	0.914541	2.35323	1.60217	0.210919	1.3155	0.821079	1233.71	14.7711	1228.54	11.4171	1219.44	17.9827	1219.44	17.9827	101.17
Blum GBDS-34 16Oct-Spot 242	80.2311	106486	2.52859	12.3415	1.05494	2.2751	1.83241	0.203731	1.49828	0.817654	1195.33	16.3471	1204.6	12.9257	1221.23	20.7336	1221.23	20.7336	97.8797
Blum GBDS-34 16Oct-Spot 109	283.197	4.63014e+06	6.09097	12.3072	0.722097	2.26774	1.43116	0.202506	1.23564	0.863381	1188.77	13.4141	1202.31	10.0851	1226.71	14.1664	1226.71	14.1664	96.9073
Blum GBDS-34 16Oct-Spot 185	123.193	113387	3.00252	12.3036	0.944531	2.3291	1.6715	0.207926	1.37905	0.825037	1217.76	15.3027	1221.2	11.8746	1227.31	18.5482	1227.31	18.5482	99.2219
Blum GBDS-34 16Oct-Spot 176	170.621	66489.7	3.51462	12.2369	0.667362	2.40422	1.31785	0.213468	1.13638	0.862298	1247.27	12.8869	1243.86	9.45075	1237.96	13.0845	1237.96	13.0845	100.752
Blum GBDS-34 16Oct-Spot 189	202.811	114007	3.38278	12.2205	0.744389	2.3948	1.27568	0.212347	1.03598	0.812097	1241.31	11.6973	1241.05	9.13774	1240.59	14.6068	1240.59	14.6068	100.058
Blum GBDS-34 16Oct-Spot 200	203.249	125667	2.76445	12.1747	0.814478	2.25312	1.32478	0.199035	1.04483	0.78868	1170.13	11.1805	1197.76	9.31684	1247.96	15.9465	1247.96	15.9465	93.7639
Blum GBDS-34 16Oct-Spot 27	139.987	53981.8	6.52747	12.1551	0.721404	2.46748	1.58292	0.21762	1.40898	0.890112	1269.29	16.2334	1262.56	11.4379	1251.09	14.1286	1251.09	14.1286	101.455
Blum GBDS-34 16Oct-Spot 30	107.497	169158	4.41878	12.1344	0.69145	2.46522	1.27858	0.217051	1.07549	0.841155	1266.27	12.3645	1261.89	9.23625	1254.46	13.5219	1254.46	13.5219	100.942
Blum GBDS-34 16Oct-Spot 155	339.325	227963	7.3817	12.0864	0.706645	2.44891	1.26829	0.214762	1.05319	0.830403	1254.14	12.0031	1257.1	9.14432	1262.2	13.7964	1262.2	13.7964	99.3615
Blum GBDS-34 16Oct-Spot 153	142.086	1.79449e+06	3.86589	12.025	0.752604	2.35905	1.40667	0.20583	1.18841	0.844836	1206.56	13.077	1230.3	10.0313	1272.11	14.6745	1272.11	14.6745	94.8476
Blum GBDS-34 16Oct-Spot 224	108.874	115302	3.14097	12.0194	0.893871	2.45748	2.14474	0.21432	1.94959	0.90901	1251.79	22.1816	1259.62	15.4799	1273.01	17.4207	1273.01	17.4207	98.3331
Blum GBDS-34 16Oct-Spot 288	178.288	126059	3.658	11.9553	0.959058	2.60336	1.55051	0.22583	1.21831	0.78575	1312.61	14.4687	1301.59	11.3749	1283.45	18.6645	1283.45	18.6645	102.272
Blum GBDS-34 16Oct-Spot 32	193.68	225142	3.03567	11.9339	0.869423	2.57976	1.61885	0.223382	1.36556	0.843542	1299.72	16.0738	1294.91	11.8462	1286.94	16.9258	1286.94	16.9258	100.993
Blum GBDS-34 16Oct-Spot 92	513.817	489793	2.2419	11.9049	0.924433	2.62902	1.68562	0.227094	1.40952	0.836202	1319.25	16.8159	1308.79	12.3999	1291.67	17.9865	1291.67	17.9865	102.136
Blum GBDS-34 16Oct-Spot 159	295.296	95436.4	3.00953	11.8435	0.640593	2.61037	1.43162	0.224321	1.28031	0.894304	1304.67	15.122	1303.56	10.5105	1301.71	12.4463	1301.71	12.4463	100.227
Blum GBDS-34 16Oct-Spot 241	264.665	131624	3.18801	11.815	0.668707	2.54566	1.2688	0.218234	1.07828	0.849841	1272.54	12.452	1285.2	9.24992	1306.4	12.9836	1306.4	12.9836	97.4083
Blum GBDS-34 16Oct-Spot 263	175.744	485510	1.36835	11.7261	0.872792	2.58866	2.0449	0.22025	1.84929	0.904339	1283.19	21.5174	1297.44	14.9788	1321.06	16.9111	1321.06	16.9111	97.134
Blum GBDS-34 16Oct-Spot 104	156.73	100648	1.90878	11.6682	0.923152	2.67556	1.40935	0.226521	1.06493	0.755613	1316.24	12.6786	1321.73	10.4173	1330.63	17.864	1330.63	17.864	98.9185
Blum GBDS-34 16Oct-Spot 14	59.4612	20835.7	2.24005	11.6661	1.24148	2.56737	1.92421	0.21732	1.47014	0.764023	1267.7	16.9189	1291.39	14.0621	1330.99	24.0229	1330.99	24.0229	95.245
Blum GBDS-34 16Oct-Spot 168	308.399	420169	3.31291	11.5587	0.658566	2.69695	1.30354	0.226188	1.12495	0.862996	1314.49	13.3772	1327.62	9.65602	1348.86	12.7123	1348.86	12.7123	97.4521
Blum GBDS-34 16Oct-Spot 281	46.399	26772.3	2.76168	11.5464	1.39159	2.63463	1.7619	0.220727	1.08063	0.613331	1285.72	12.596	1310.36	12.9686	1350.9	26.8536	1350.9	26.8536	95.1747
Blum GBDS-34 16Oct-Spot 255	35.8705	10650.8	3.75424	11.5325	0.970002	2.87433	1.34641	0.240519	0.933764	0.693521	1389.39	11.6708	1375.21	10.1429	1353.23	18.7117	1353.23	18.7117	102.673
Blum GBDS-34 16Oct-Spot 29	78.9214	31075.8	1.51798	11.4248	1.06223	2.80679	1.67277	0.232673	1.29222	0.772504	1348.49	15.7237	1357.35	12.5239	1371.31	20.4387	1371.31	20.4387	98.3361
Blum GBDS-34 16Oct-Spot 215	50.9385	28663.8	2.78313	11.4069	0.892314	2.79662	1.39492	0.231467	1.07218	0.768633	1342.18	12.9913	1354.63	10.4335	1374.32	17.1624	1374.32	17.1624	97.6611
Blum GBDS-34 16Oct-Spot 16	143.704	118318	3.6212	11.3477	0.757811	2.93185	1.30294	0.2414	1.0599	0.813465	1393.97	13.2865	1390.17	9.86539	1384.32	14.5543	1384.32	14.5543	100.697
Blum GBDS-34 16Oct-Spot 180	123.188	127763	2.45548	11.3221	0.800256	2.86302	1.36426	0.2352	1.10489	0.809886	1361.7	13.5625	1372.24	10.2669	1388.67	15.3604	1388.67	15.3604	98.0579
Blum GBDS-34 16Oct-Spot 24	124.935	105298	3.9728	11.258	0.763081	2.88239	1.33742	0.235451	1.09836	0.821254	1363	13.4939	1377.32	10.0824	1399.56	14.6251	1399.56	14.6251	97.3881
Blum GBDS-34 16Oct-Spot 229	821.483	314512	1.99872	11.2546	0.736112	2.80885	1.40859	0.229374	1.20094	0.852585	1331.22	14.4444	1357.9	10.5479	1400.14	14.1071	1400.14	14.1071	95.0777
Blum GBDS-34 16Oct-Spot 202	181.704	59885.9	4.00014	11.2522	0.863447	2.88568	1.61603	0.235598	1.36602	0.845294	1363.77	16.7908	1378.18	12.1866	1400.55	16.5465	1400.55	16.5465	97.3744
Blum GBDS-34 16Oct-Spot 278	549.274	110676	24.9093	11.2207	0.844624	2.79774	1.45257	0.227779	1.18176	0.813567	1322.85	14.1332	1354.93	10.8659	1405.92	16.174	1405.92	16.174	94.0915
Blum GBDS-34 16Oct-Spot 133	466.962	362595	4.68384	11.182	0.785835	2.77072	2.57842	0.224803	2.45575	0.952425	1307.2	29.0563	1347.68	19.2399	1412.51	15.0347	1412.51	15.0347	92.5445
Blum GBDS-34 16Oct-Spot 253	230.842	148481	3.99654	11.0543	0.868105	3.17359	1.53968	0.254549	1.27161	0.825896	1461.89	16.6325	1450.76	11.8883	1434.46	16.5594	1434.46	16.5594	101.913
Blum GBDS-34 16Oct-Spot 132	495.431	374238	2.72605	10.9299	0.632175	3.07816	1.50543	0.244114	1.36627	0.907557	1408.05	17.2817	1427.27	11.5382	1456.03	12.0238	1456.03	12.0238	96.705
Blum GBDS-34 16Oct-Spot 284	248.701	123609	3.21226	10.9271	0.710544	3.20845	1.44088	0.254383	1.2535	0.869954	1461.04	16.387	1459.2	11.1544	1456.51	13.5135	1456.51	13.5135	100.311
Blum GBDS-34 16Oct-Spot 156	345.772	126310	2.22115	10.8815	0.796449	3.21384	1.56195	0.253747	1.34363	0.860229	1457.77	17.5304	1460.5	12.0966	1464.45	15.1312	1464.45	15.1312	99.544
Blum GBDS-34 16Oct-Spot 264	776.41	372310	2.97972	10.8414	0.706563	3.17183	1.39176	0.249507	1.19907	0.861549	1435.93	15.4351	1450.33	10.7447	1471.47	13.4108	1471.47	13.4108	97.5851
Blum GBDS-34 16Oct-Spot 87	39.2795	26655.3	3.70362	10.813	0.851753	3.18029	1.37689	0.249517	1.08182	0.7857	1435.99	13.9262	1452.39	10.6366	1476.45	16.1558	1476.45	16.1558	97.2596
Blum GBDS-34 16Oct-Spot 73	218.678	102689	5.13301	10.8084	0.897994	3.0847	1.63909	0.241915	1.37122	0.83657	1396.64	17.2185	1428.9	12.5692	1477.25	17.0311	1477.25	17.0311	94.5435
Blum GBDS-34 16Oct-Spot 63	145.37	91910.1	2.95631	10.7733	0.87931	3.37233	1.51875	0.263614	1.23831	0.815348	1508.3	16.6533	1497.99	11.8947	1483.41	16.663	1483.41	16.663	101.678
Blum GBDS-34 16Oct-Spot 213	106.499	130143	4.49613	10.722	0.820429	3.25516	1.35577	0.253241	1.07936	0.796121	1455.17	14.06	1470.41	10.5315	1492.46	15.5284	1492.46	15.5284	97.5011
Blum GBDS-34 16Oct-Spot 35	125.275	1.65042e+06	3.80569	10.703	0.807267	3.38416	1.32463	0.262811	1.05022	0.79284	1504.21	14.0898	1500.73	10.3825	1495.82	15.2724	1495.82	15.2724	100.561
Blum GBDS-34 16Oct-Spot 223	146.469	176990	2.03832	10.6891	0.830904	3.28065	1.32985	0.254442	1.03832	0.780777	1461.34	13.5765	1476.47	10.349	1498.27	15.7144	1498.27	15.7144	97.5352
Blum GBDS-34 16Oct-Spot 265	270.429	373846	3.26741	10.6498	0.537995	3.33811	1.14654	0.257947	1.01248	0.883075	1479.33	13.3837	1490.01	8.95842	1505.23	10.1653	1505.23	10.1653	98.2795
Blum GBDS-34 16Oct-Spot 74	563.256	253271	4.09936	10.6226	0.652048	3.30991	1.42654	0.255115	1.2688	0.889423	1464.8	16.625	1483.39	11.1244	1510.06	12.3108	1510.06	12.3108	97.0024
Blum GBDS-34 16Oct-Spot 20	57.8631	281086	1.20071	10.6224	1.21358	3.138	1.75346	0.24186	1.26564	0.721797	1396.36	15.8899	1442.06	13.5025	1510.1	22.9146	1510.1	22.9146	92.468
Blum GBDS-34 16Oct-Spot 119	1002.31	108327	4.31358	10.5816	0.754314	3.26507	1.62534	0.250686	1.4397	0.885785	1442.01	18.6026	1472.77	12.6346	1517.37	14.2281	1517.37	14.2281	95.0339
Blum GBDS-34 16Oct-Spot 125	163.681	123744	3.41102	10.5612	0.639424	3.26088	1.11492	0.249883	0.913331	0.819193	1437.87	11.771	1471.77	8.66399	1521	12.0549	1521	12.0549	94.535
Blum GBDS-34 16Oct-Spot 289	98.0959	63969.1	3.57972	10.5399	0.672393	3.51935	1.31383	0.269144	1.12874	0.859117	1536.46	15.4307	1531.57	10.389	1524.81	12.6702	1524.81	12.6702	100.764
Blum GBDS-34 16Oct-Spot 275	517.981	1.15578e+06	4.57879	10.5067	0.750027	3.41875	1.68245	0.260627	1.50602	0.895135	1493.05	20.0717	1508.71	13.218	1530.76	14.1222	1530.76	14.1222	97.5368
Blum GBDS-34 16Oct-Spot 231	196.88	939300	3.01581	10.4889	0.882611	3.40068	1.38247	0.258812	1.06406	0.769681	1483.76	14.103	1504.55	10.848	1533.93	16.612	1533.93	16.612	96.7293
Blum GBDS-34 16Oct-Spot 267	196.418	6.61977e+06	16.8083	10.2865	0.607984	3.74811	1.45047	0.27975	1.3169	0.907911	1590.1	18.5573	1581.71	11.6265	1570.52	11.3875	1570.52	11.3875	101.247
Blum GBDS-34 16Oct-Spot 111	284.906	1.62013e+06	3.21069	10.2434	0.97266	2.92122	2.07217	0.217119	1.8297	0.88299	1266.63	21.0409	1387.42	15.6759	1578.38	18.2004	1578.38	18.2004	80.2486
Blum GBDS-34 16Oct-Spot 47	252.72	535251	4.17687	10.2087	0.898717	3.65255	1.64421	0.270554	1.37686	0.837398	1543.61	18.9004	1561.07	13.1074	1584.74	16.8027	1584.74	16.8027	97.4049
Blum GBDS-34 16Oct-Spot 37	664.387	283652	14.5205	10.1496	0.827424	3.08117	2.09074	0.226909	1.92005	0.918356	1318.28	22.8914	1428.02	16.0287	1595.58	15.4494	1595.58	15.4494	82.6205
Blum GBDS-34 16Oct-Spot 127	305.1	793688	1.92029	10.1447	0.775492	3.64992	1.1666	0.268666	0.871527	0.747068	1534.02	11.8977	1560.49	9.29824	1596.48	14.478	1596.48	14.478	96.0881
Blum GBDS-34 16Oct-Spot 18	525.353	479899	12.5649	10.0792	0.710883	3.72317	1.32472	0.272286	1.11782	0.843818	1552.4	15.4217	1576.36	10.6035	1608.57	13.2492	1608.57	13.2492	96.5077
Blum GBDS-34 16Oct-Spot 90	353.131	830598	1.33845	10.0716	0.760579	4.05639	1.33752	0.296433	1.10022	0.82258	1673.6	16.2171	1645.58	10.8955	1609.97	14.173	1609.97	14.173	103.952
Blum GBDS-34 16Oct-Spot 120	107.382	69381.1	1.84506	10.0689	0.565351	3.91493	1.39858	0.286018	1.27923	0.914657	1621.6	18.3405	1616.77	11.3121	1610.48	10.5355	1610.48	10.5355	100.691
Blum GBDS-34 16Oct-Spot 305	156.043	109315	3.55439	10.0611	0.854952	3.92793	1.3306	0.286745	1.01958	0.766258	1625.24	14.6468	1619.45	10.7694	1611.92	15.9279	1611.92	15.9279	100.826
Blum GBDS-34 16Oct-Spot 306	50.4869	29424.8	2.49005	10.0412	0.948256	3.76484	1.41694	0.274297	1.05287	0.743058	1562.57	14.6098	1585.28	11.3684	1615.6	17.658	1615.6	17.658	96.7177
Blum GBDS-34 16Oct-Spot 115	145.43	107045	2.1277	10.0408	0.572744	3.95189	1.10125	0.287913	0.940589	0.854113	1631.09	13.5548	1624.38	8.924	1615.68	10.6645	1615.68	10.6645	100.954
Blum GBDS-34 16Oct-Spot 5	146.499	102259	2.64509	10.0359	0.733851	3.76544	1.14283	0.274195	0.876081	0.766591	1562.06	12.1531	1585.41	9.16928	1616.59	13.6632	1616.59	13.6632	96.627
Blum GBDS-34 16Oct-Spot 43	124.73	417759	1.68914	10.0104	0.66254	4.0143	1.11009	0.291573	0.890699	0.802365	1649.38	12.9622	1637.1	9.02402	1621.33	12.3278	1621.33	12.3278	101.73
Blum GBDS-34 16Oct-Spot 301	127.232	476194	1.43092	9.96263	0.827286	4.00572	1.4432	0.289563	1.18256	0.819396	1639.34	17.1175	1635.36	11.7271	1630.22	15.3761	1630.22	15.3761	100.56
Blum GBDS-34 16Oct-Spot 21	97.4995	111226	1.3323	9.96154	0.955941	3.96468	1.92291	0.286564	1.66846	0.867675	1624.34	23.9567	1627	15.5934	1630.42	17.7672	1630.42	17.7672	99.6268
Blum GBDS-34 16Oct-Spot 1	136.527	80530.1	2.19734	9.95975	0.895725	3.86454	1.63103	0.279276	1.36306	0.835706	1587.71	19.1824	1606.31	13.1575	1630.76	16.6471	1630.76	16.6471	97.3606
Blum GBDS-34 16Oct-Spot 147	311.681	185738	2.72336	9.95741	0.652936	3.48778	1.29769	0.25199	1.12146	0.864197	1448.73	14.5507	1524.45	10.2408	1631.19	12.1336	1631.19	12.1336	88.8142
Blum GBDS-34 16Oct-Spot 300	129.792	134414	3.64949	9.95589	0.725108	3.9705	1.14724	0.286823	0.889026	0.774929	1625.63	12.774	1628.19	9.3055	1631.47	13.4746	1631.47	13.4746	99.6419
Blum GBDS-34 16Oct-Spot 70	718.509	921552	5.75623	9.94478	0.795886	3.89736	1.67909	0.281224	1.47849	0.880526	1597.53	20.9201	1613.13	13.5687	1633.55	14.7861	1633.55	14.7861	97.7946
Blum GBDS-34 16Oct-Spot 247	305.886	130802	3.53901	9.94031	0.789372	3.97825	1.33828	0.286933	1.08069	0.807521	1626.18	15.5327	1629.77	10.8595	1634.39	14.6634	1634.39	14.6634	99.4982
Blum GBDS-34 16Oct-Spot 80	424.807	730827	3.84271	9.93972	0.615886	4.0078	1.31569	0.289046	1.16263	0.88367	1636.76	16.8059	1635.78	10.692	1634.5	11.4418	1634.5	11.4418	100.139
Blum GBDS-34 16Oct-Spot 249	179.964	482806	1.43467	9.93281	0.856807	3.76248	1.62907	0.271165	1.38555	0.850517	1546.71	19.0535	1584.78	13.0688	1635.79	15.9134	1635.79	15.9134	94.5547
Blum GBDS-34 16Oct-Spot 106	324.219	524653	4.69014	9.9136	0.657981	3.83662	1.70621	0.275974	1.57424	0.92265	1571.05	21.9491	1600.46	13.7435	1639.38	12.2162	1639.38	12.2162	95.8321
Blum GBDS-34 16Oct-Spot 298	76.9627	183765	0.75778	9.90312	0.785926	3.88683	1.07107	0.27929	0.727673	0.67939	1587.79	10.241	1610.95	8.6502	1641.35	14.588	1641.35	14.588	96.7368
Blum GBDS-34 16Oct-Spot 238	159.636	2.78291e+06	1.83265	9.87176	0.728917	3.75616	1.07756	0.269046	0.793602	0.736484	1535.96	10.846	1583.43	8.64107	1647.23	13.5196	1647.23	13.5196	93.2448
Blum GBDS-34 16Oct-Spot 41	86.774	345503	2.34899	9.852	0.897742	4.16218	1.59359	0.297532	1.31665	0.82622	1679.06	19.4629	1666.61	13.0472	1650.95	16.6413	1650.95	16.6413	101.703
Blum GBDS-34 16Oct-Spot 112	109.154	96275.7	1.3546	9.84242	0.68205	3.99268	1.19468	0.285138	0.980852	0.821016	1617.18	14.029	1632.71	9.70121	1652.75	12.6396	1652.75	12.6396	97.8481
Blum GBDS-34 16Oct-Spot 122	90.1539	36701.5	1.1211	9.64361	0.938049	4.30738	1.34928	0.301398	0.969861	0.718797	1698.24	14.4797	1694.77	11.1195	1690.48	17.3013	1690.48	17.3013	100.459
Blum GBDS-34 16Oct-Spot 271	243.314	705877	5.46979	9.63151	0.852135	4.47805	1.41895	0.312947	1.13458	0.799594	1755.19	17.4333	1726.91	11.7782	1692.79	15.7118	1692.79	15.7118	103.686
Blum GBDS-34 16Oct-Spot 218	55.3247	31261.8	2.02355	9.62358	0.772382	4.09403	1.26732	0.285874	1.00476	0.792817	1620.88	14.3998	1653.11	10.3424	1694.31	14.2384	1694.31	14.2384	95.666
Blum GBDS-34 16Oct-Spot 222	382.296	49946.8	2.32718	9.54233	0.695672	4.02389	1.41398	0.278605	1.23101	0.870598	1584.33	17.2915	1639.04	11.5	1709.92	12.7988	1709.92	12.7988	92.6551
Blum GBDS-34 16Oct-Spot 195	123.722	226651	1.78194	9.50891	0.877357	4.48879	1.50471	0.309705	1.22246	0.81242	1739.25	18.6349	1728.9	12.4956	1716.38	16.1289	1716.38	16.1289	101.333
Blum GBDS-34 16Oct-Spot 148	114.815	51054	2.57793	9.48359	0.848467	4.25325	1.44332	0.292672	1.1676	0.808965	1654.87	17.0414	1684.37	11.8661	1721.28	15.5899	1721.28	15.5899	96.1421
Blum GBDS-34 16Oct-Spot 142	698.723	202120	2.51079	9.4674	0.849855	3.92489	1.41852	0.269616	1.13576	0.800665	1538.85	15.5482	1618.83	11.4793	1724.42	15.6092	1724.42	15.6092	89.2391
Blum GBDS-34 16Oct-Spot 50	265.141	310439	3.70435	9.365	0.857872	4.56709	1.37452	0.310338	1.07395	0.781326	1742.37	16.3967	1743.28	11.4502	1744.36	15.7154	1744.36	15.7154	99.886
Blum GBDS-34 16Oct-Spot 309	98.1362	68061.1	2.88648	9.28418	0.673135	4.68114	1.10592	0.315343	0.877463	0.793426	1766.94	13.561	1763.87	9.25296	1760.22	12.3082	1760.22	12.3082	100.382
Blum GBDS-34 16Oct-Spot 131	215.423	141544	2.77715	9.27755	0.743305	4.56725	1.28288	0.307451	1.0456	0.815042	1728.15	15.8503	1743.31	10.6868	1761.53	13.5891	1761.53	13.5891	98.1052
Blum GBDS-34 16Oct-Spot 65	185.341	120390	1.54595	9.27688	0.738542	4.47591	1.57319	0.301281	1.38906	0.882957	1697.66	20.732	1726.52	13.0575	1761.66	13.5018	1761.66	13.5018	96.3668
Blum GBDS-34 16Oct-Spot 71	112.356	95216.3	3.16918	9.27157	0.754864	4.86539	1.40347	0.32731	1.18317	0.843036	1825.33	18.8085	1796.28	11.8215	1762.71	13.7984	1762.71	13.7984	103.552
Blum GBDS-34 16Oct-Spot 110	197.632	207941	2.82762	9.18541	0.80159	4.88913	1.23486	0.32585	0.93933	0.760676	1818.24	14.882	1800.38	10.4099	1779.76	14.6198	1779.76	14.6198	102.162
Blum GBDS-34 16Oct-Spot 94	320.75	129035	6.84511	9.13781	0.614947	4.92593	1.13694	0.326602	0.956285	0.841102	1821.89	15.1769	1806.71	9.59651	1789.22	11.2021	1789.22	11.2021	101.826
Blum GBDS-34 16Oct-Spot 277	276.2	9.20576e+06	1.70651	9.11516	0.809493	4.73601	1.36881	0.313231	1.10379	0.806388	1756.59	16.9719	1773.63	11.4761	1793.75	14.7386	1793.75	14.7386	97.9284
Blum GBDS-34 16Oct-Spot 276	147.03	153905	1.94189	9.10615	0.778125	4.86406	1.38476	0.321382	1.14546	0.82719	1796.47	17.9594	1796.05	11.6633	1795.55	14.166	1795.55	14.166	100.052
Blum GBDS-34 16Oct-Spot 204	15.7599	8645.7	1.88578	9.09108	1.01637	4.7182	1.48639	0.311229	1.0846	0.729687	1746.75	16.5955	1770.48	12.4538	1798.56	18.4966	1798.56	18.4966	97.1194
Blum GBDS-34 16Oct-Spot 23	42.941	95718.5	1.52577	9.07598	0.784043	4.87208	1.71138	0.320845	1.52122	0.888883	1793.85	23.8207	1797.44	14.4188	1801.59	14.2631	1801.59	14.2631	99.5709
Blum GBDS-34 16Oct-Spot 105	277.505	289936	3.27477	9.07553	0.863233	4.88196	1.49158	0.32148	1.2164	0.815514	1796.95	19.0761	1799.15	12.571	1801.68	15.7017	1801.68	15.7017	99.7378
Blum GBDS-34 16Oct-Spot 95	53.3798	138432	5.39344	9.06826	0.941707	4.80879	1.50716	0.316408	1.17674	0.780768	1772.16	18.233	1786.44	12.6696	1803.13	17.1263	1803.13	17.1263	98.2826
Blum GBDS-34 16Oct-Spot 68	287.911	142713	7.68349	9.05159	0.751171	4.73951	1.45277	0.311276	1.24349	0.855948	1746.98	19.0289	1774.25	12.1816	1806.48	13.655	1806.48	13.655	96.7066
Blum GBDS-34 16Oct-Spot 116	563.069	187409	3.21041	9.04514	0.73507	4.88802	1.38682	0.320801	1.17599	0.847973	1793.64	18.4128	1800.19	11.6905	1807.77	13.3602	1807.77	13.3602	99.2183
Blum GBDS-34 16Oct-Spot 296	205.598	148620	2.7952	8.79651	0.72806	5.08685	1.38925	0.324673	1.18319	0.851676	1812.51	18.6944	1833.91	11.7892	1858.28	13.1517	1858.28	13.1517	97.5372
Blum GBDS-34 16Oct-Spot 96	76.5627	37414.1	1.42314	8.78405	0.748499	5.23587	1.61674	0.333712	1.43304	0.886375	1856.35	23.1146	1858.47	13.7844	1860.84	13.5168	1860.84	13.5168	99.7587
Blum GBDS-34 16Oct-Spot 162	176.377	179461	3.07795	8.76506	0.848991	5.24559	1.38324	0.333609	1.09205	0.789487	1855.85	17.6105	1860.06	11.7969	1864.75	15.3246	1864.75	15.3246	99.5228
Blum GBDS-34 16Oct-Spot 8	170.733	117700	4.80783	8.71262	0.615698	5.21219	1.40232	0.329501	1.25992	0.898459	1835.96	20.1295	1854.61	11.9474	1875.57	11.1003	1875.57	11.1003	97.8881
Blum GBDS-34 16Oct-Spot 230	69.1285	34870.2	0.435698	8.70745	1.07154	5.27406	1.92538	0.333215	1.59965	0.830826	1853.94	25.7733	1864.67	16.4354	1876.64	19.3146	1876.64	19.3146	98.7906
Blum GBDS-34 16Oct-Spot 36	96.4112	80369.5	1.5857	8.70116	0.645767	5.30592	1.19515	0.334985	1.00567	0.841459	1862.5	16.2677	1869.82	10.2113	1877.94	11.6392	1877.94	11.6392	99.1776
Blum GBDS-34 16Oct-Spot 219	53.1669	50623.2	1.26763	8.59298	0.693217	5.30201	1.30077	0.330577	1.10067	0.846162	1841.18	17.6282	1869.19	11.1125	1900.46	12.4589	1900.46	12.4589	96.8807
Blum GBDS-34 16Oct-Spot 214	57.9392	78663.8	2.91564	7.98564	0.820856	6.18646	1.46705	0.358459	1.2159	0.82881	1974.87	20.6829	2002.54	12.824	2031.19	14.529	2031.19	14.529	97.2269
Blum GBDS-34 16Oct-Spot 172	54.5718	99820.3	2.21183	7.70265	0.672164	6.61517	1.72694	0.369717	1.59076	0.921144	2028.07	27.6798	2061.37	15.2335	2094.82	11.813	2094.82	11.813	96.8133
Blum GBDS-34 16Oct-Spot 152	105.969	107550	3.22356	7.62977	0.898873	6.78204	1.59236	0.375457	1.31439	0.825438	2055.03	23.1291	2083.38	14.0918	2111.51	15.7657	2111.51	15.7657	97.3249
Blum GBDS-34 16Oct-Spot 6	238.854	438674	2.92033	6.1528	0.813067	9.67506	1.49747	0.431931	1.25752	0.839759	2314.42	24.4527	2404.34	13.7816	2481.38	13.714	2481.38	13.714	93.2715
Blum GBDS-34 16Oct-Spot 12	19.6754	8269.21	2.05686	6.04638	0.938536	10.068	1.71269	0.441698	1.43264	0.836485	2358.24	28.295	2441.04	15.8204	2510.76	15.7811	2510.76	15.7811	93.9254
Blum GBDS-34 16Oct-Spot 58	141.703	94934.2	11.2187	5.92688	1.31481	10.7708	1.77231	0.463193	1.18842	0.670548	2453.64	24.2521	2503.55	16.4683	2544.27	22.0366	2544.27	22.0366	96.4378
Blum GBDS-34 16Oct-Spot 272	112.834	139452	2.31653	5.68617	0.882369	12.4202	1.50151	0.512431	1.21489	0.809112	2667	26.5349	2636.7	14.1109	2613.52	14.6912	2613.52	14.6912	102.046
Blum GBDS-34 16Oct-Spot 67	142.644	359569	1.4184	5.67691	0.742824	12.3723	1.30249	0.509625	1.06991	0.82143	2655.03	23.2835	2633.08	12.2369	2616.23	12.3645	2616.23	12.3645	101.483
Blum GBDS-34 16Oct-Spot 118	288.941	119929	2.56171	5.65182	0.924285	10.2866	1.69478	0.421841	1.42055	0.838194	2268.83	27.1691	2460.9	15.685	2623.61	15.3741	2623.61	15.3741	86.4777
Blum GBDS-34 16Oct-Spot 210	202.771	107849	6.11925	5.54142	0.611359	12.4007	1.3386	0.498605	1.19084	0.889613	2607.8	25.5412	2635.23	12.5783	2656.36	10.1374	2656.36	10.1374	98.1719
Blum GBDS-34 16Oct-Spot 123	50.2288	865611	3.62451	5.52903	0.856551	11.304	1.51712	0.453491	1.25218	0.825371	2410.75	25.1852	2548.53	14.1535	2660.07	14.1981	2660.07	14.1981	90.6274
Blum GBDS-34 16Oct-Spot 69	25.9485	43728.3	6.80906	5.41261	0.810224	13.3398	1.36124	0.523895	1.09385	0.80357	2715.68	24.242	2704.01	12.8586	2695.28	13.3824	2695.28	13.3824	100.757
Blum GBDS-34 16Oct-Spot 40	190.195	212924	2.10429	5.355	0.7307	13.6476	1.20031	0.530278	0.952273	0.793355	2742.62	21.2723	2725.57	11.3562	2712.94	12.0519	2712.94	12.0519	101.094
Blum GBDS-34 16Oct-Spot 209	71.1749	137425	2.0099	5.34643	1.04109	12.9852	1.79321	0.503734	1.46004	0.814208	2629.83	31.5296	2678.58	16.9075	2715.58	17.1672	2715.58	17.1672	96.842
Blum GBDS-34 16Oct-Spot 285	51.2787	67124.6	0.714324	5.34292	0.796152	12.991	1.28679	0.503628	1.01092	0.785617	2629.37	21.8276	2679	12.1325	2716.67	13.1268	2716.67	13.1268	96.7865
Blum GBDS-34 16Oct-Spot 103	117.476	579005	2.32098	5.31922	0.719036	13.5247	1.35196	0.521991	1.14489	0.84684	2707.62	25.3125	2717.01	12.7831	2724	11.8437	2724	11.8437	99.3987
Blum GBDS-34 16Oct-Spot 252	183.881	107627	1.70514	5.28379	0.478621	13.5604	1.07705	0.519883	0.964863	0.895838	2698.69	21.2756	2719.51	10.1854	2734.99	7.87457	2734.99	7.87457	98.6725
Blum GBDS-34 16Oct-Spot 310	732.174	808073	3.76412	5.25325	0.788422	11.7952	1.35014	0.449593	1.09603	0.811786	2393.44	21.9136	2588.28	12.6383	2744.53	12.9627	2744.53	12.9627	87.2077
Blum GBDS-34 16Oct-Spot 217	120.914	5.99782e+06	1.77861	5.1228	1.09437	14.7068	2.36139	0.546656	2.09249	0.886126	2811.25	47.677	2796.46	22.4542	2785.8	17.9263	2785.8	17.9263	100.914
Blum GBDS-34 16Oct-Spot 48	144.514	153054	1.52757	5.07014	0.761721	14.7146	1.60537	0.541322	1.41315	0.880265	2788.98	31.9943	2796.96	15.2645	2802.71	12.4605	2802.71	12.4605	99.5101
Blum GBDS-34 16Oct-Spot 170	47.2128	51086	1.69879	5.05492	0.724631	13.9492	1.34103	0.511624	1.1284	0.841439	2663.56	24.6201	2746.26	12.7064	2807.63	11.8484	2807.63	11.8484	94.8686
Blum GBDS-34 16Oct-Spot 294	81.694	94220.4	8.89949	4.79255	0.888743	16.036	1.47739	0.557636	1.18018	0.798826	2856.85	27.2366	2878.95	14.1215	2894.42	14.4163	2894.42	14.4163	98.7019
Blum GBDS-34 16Oct-Spot 232	70.6856	112409	1.91177	4.61057	0.816073	16.9818	1.2875	0.568102	0.995838	0.773464	2900.02	23.2574	2933.81	12.3467	2957.05	13.1689	2957.05	13.1689	98.0715
Blum GBDS-34 16Oct-Spot 85	107.806	359072	2.94677	4.60385	0.522562	15.6853	1.06662	0.523964	0.929847	0.871767	2715.97	20.6091	2857.82	10.1816	2959.41	8.43069	2959.41	8.43069	91.7741
Blum GBDS-34 16Oct-Spot 114	243.282	348402	1.50986	3.93068	0.668481	22.0478	1.28036	0.628812	1.092	0.852882	3144.89	27.1765	3185.84	12.4371	3211.72	10.5574	3211.72	10.5574	97.9192

## Sheet: Hernasco
Table _____. U-Pb geochronologic analyses.
							Isotope ratios						Apparent ages (Ma)
Analysis	U	206Pb	U/Th	206Pb*	±	207Pb*	±	206Pb*	±	error	206Pb*	±	207Pb*	±	206Pb*	±	Best age	±	Conc
	(ppm)	204Pb		207Pb*	(%)	235U*	(%)	238U	(%)	corr.	238U*	(Ma)	235U	(Ma)	207Pb*	(Ma)	(Ma)	(Ma)	(%)
-Spot 29	153.328	162788	4.14196	17.0226	0.661748	0.661633	3.1567	0.0817206	3.08656	0.97778	506.385	15.0318	515.612	12.7635	556.698	14.4408	506.385	15.0318	90.9623
-Spot 298	73.4152	11231.4	5.11738	17.4926	1.59228	0.657869	3.41019	0.0834989	3.01563	0.884301	516.973	14.9813	513.31	13.7412	497.007	35.0832	516.973	14.9813	104.017
-Spot 235	127.329	27242.4	1.92999	17.2411	0.787978	0.668806	1.48211	0.0836668	1.25529	0.846958	517.972	6.24767	519.986	6.03128	528.863	17.2501	517.972	6.24767	97.9408
-Spot 14	129.113	847709	1.04225	16.6355	0.858581	0.697963	1.55052	0.0842473	1.29111	0.832692	521.425	6.46709	537.573	6.4717	606.66	18.5616	521.425	6.46709	85.9501
-Spot 276	91.8436	19179.7	2.21563	17.3266	0.898839	0.671166	1.31535	0.0843786	0.960325	0.730093	522.206	4.81713	521.421	5.36395	517.967	19.7538	522.206	4.81713	100.818
-Spot 287	146.869	67894.2	0.879531	16.8383	0.76541	0.690819	2.64521	0.0844015	2.53205	0.957221	522.341	12.7043	533.293	10.9742	580.431	16.6416	522.341	12.7043	89.992
-Spot 160	70.2415	65588.8	1.88035	16.7494	1.00522	0.696387	2.80233	0.0846327	2.61583	0.933449	523.716	13.1578	536.631	11.6814	591.885	21.7834	523.716	13.1578	88.4826
-Spot 182	34.5334	27286.9	1.08692	16.8772	1.05081	0.691382	1.39872	0.0846654	0.923162	0.660003	523.91	4.64522	533.63	5.80555	575.384	22.8451	523.91	4.64522	91.054
-Spot 118	42.8159	24801	1.03188	17.0003	1.03891	0.688321	1.86153	0.0849056	1.54466	0.829779	525.337	7.79284	531.791	7.70628	559.58	22.6278	525.337	7.79284	93.8807
-Spot 159	176.72	85235.7	1.48856	16.6822	0.785456	0.702887	2.57243	0.0850799	2.44958	0.952244	526.373	12.3816	540.514	10.7817	600.595	17.005	526.373	12.3816	87.6419
-Spot 142	82.9768	12002.5	1.37312	17.1938	0.721005	0.683389	1.04749	0.0852564	0.759862	0.725412	527.421	3.84811	528.821	4.31784	534.867	15.785	527.421	3.84811	98.608
-Spot 265	79.7868	19826.1	2.73443	16.9499	0.908012	0.693682	1.26844	0.0853129	0.885697	0.698256	527.757	4.48811	535.01	5.27513	566.077	19.7847	527.757	4.48811	93.2306
-Spot 229	203.598	139488	2.36754	16.8492	0.643736	0.699934	1.43158	0.0855703	1.27868	0.893195	529.286	6.49747	538.751	5.98514	579.01	14.0078	529.286	6.49747	91.4122
-Spot 174	87.1825	165370	1.31182	16.6609	1.07017	0.70812	2.86538	0.0856037	2.65804	0.927638	529.484	13.5114	543.629	12.0621	603.364	23.1521	529.484	13.5114	87.7553
-Spot 100	571.102	234753	32.9714	17.1355	0.62767	0.68856	1.43595	0.0856105	1.29151	0.899408	529.525	6.56551	531.935	5.94566	542.266	13.7159	529.525	6.56551	97.6504
-Spot 217	71.1839	20141	1.35812	17.2248	0.941877	0.687608	1.30184	0.0859376	0.898699	0.690329	531.466	4.5847	531.362	5.38594	530.936	20.6485	531.466	4.5847	100.1
-Spot 164	80.9318	18824.2	1.99373	17.0367	0.927117	0.69717	2.55479	0.0861813	2.38063	0.931831	532.913	12.1765	537.099	10.6565	554.934	20.2114	532.913	12.1765	96.0319
-Spot 312	86.9931	60120.1	1.50147	16.9256	1.06654	0.701801	2.70265	0.0861879	2.4833	0.918841	532.952	12.7025	539.866	11.3173	569.195	23.2339	532.952	12.7025	93.6326
-Spot 13	140.206	170829	3.70001	17.0969	0.7089	0.697312	2.91305	0.0865029	2.82547	0.969938	534.822	14.5014	537.184	12.1524	547.247	15.4644	534.822	14.5014	97.7296
-Spot 81	256.446	412407	0.978211	16.8195	0.809672	0.708927	2.89737	0.0865174	2.78194	0.96016	534.907	14.2802	544.109	12.2049	582.821	17.5602	534.907	14.2802	91.7791
-Spot 263	64.9067	12435.2	1.35084	17.3228	1.30407	0.688395	1.68988	0.0865253	1.07476	0.635996	534.954	5.51737	531.836	6.9961	518.457	28.6433	534.954	5.51737	103.182
-Spot 213	86.1331	82088.5	0.824083	16.8831	1.13827	0.70673	1.48687	0.0865754	0.956618	0.643378	535.252	4.9135	542.803	6.25167	574.627	24.7297	535.252	4.9135	93.1476
-Spot 120	68.7998	226412	1.6153	17.1438	0.968331	0.696062	2.44532	0.0865852	2.24542	0.918253	535.31	11.5344	536.436	10.1903	541.23	21.1739	535.31	11.5344	98.9061
-Spot 278	219.688	2.15313e+06	0.845557	16.9594	0.700516	0.70372	1.40554	0.0865963	1.21853	0.866949	535.375	6.26017	541.01	5.89494	564.806	15.2651	535.375	6.26017	94.7893
-Spot 194	186.564	68187.9	0.638882	17.152	0.836259	0.695962	1.29989	0.086614	0.995184	0.765589	535.481	5.11369	536.376	5.4164	540.182	18.3106	535.481	5.11369	99.1296
-Spot 187	151.821	44204.1	2.18594	17.1591	0.662755	0.696579	1.36805	0.0867265	1.1968	0.874819	536.148	6.15703	536.746	5.7034	539.307	14.5111	536.148	6.15703	99.4143
-Spot 18	31.085	10128.1	0.993784	17.3509	1.17865	0.689913	1.5575	0.0868568	1.01813	0.653694	536.921	5.24507	532.748	6.45643	514.897	25.8887	536.921	5.24507	104.277
-Spot 134	117.033	24680.7	2.20965	16.9699	0.842002	0.708126	1.20931	0.0871924	0.868025	0.717785	538.911	4.48769	543.633	5.09052	563.459	18.3545	538.911	4.48769	95.6435
-Spot 256	48.7623	19772.2	1.01607	16.9443	1.23002	0.709592	1.68038	0.0872411	1.14487	0.681315	539.2	5.922	544.504	7.08207	566.787	26.7873	539.2	5.922	95.1327
-Spot 285	38.6382	18794.3	1.11	17.3109	1.39017	0.695068	1.73924	0.087304	1.04516	0.600933	539.573	5.40986	535.841	7.24162	519.964	30.5001	539.573	5.40986	103.771
-Spot 216	82.2793	102506	2.56834	16.9191	0.954827	0.711221	1.21336	0.0873108	0.748694	0.617043	539.613	3.87558	545.471	5.1206	570.025	20.7765	539.613	3.87558	94.6648
-Spot 221	74.6713	301878	2.98567	16.9213	1.05004	0.711533	1.32572	0.087361	0.809287	0.610451	539.911	4.19145	545.656	5.59623	569.737	22.8722	539.911	4.19145	94.7648
-Spot 270	65.768	64453.3	1.90122	16.9071	1.26728	0.712433	1.6499	0.0873977	1.05649	0.640336	540.128	5.47387	546.19	6.96986	571.557	27.5675	540.128	5.47387	94.5012
-Spot 139	59.709	14647.2	1.12955	17.1481	1.09592	0.702421	1.61319	0.087398	1.18379	0.733818	540.13	6.13346	540.236	6.75853	540.702	23.9672	540.13	6.13346	99.8942
-Spot 145	68.723	68815.7	1.48918	17.0401	1.05681	0.707398	1.66886	0.087463	1.29161	0.773945	540.515	6.69666	543.2	7.02079	554.461	23.0579	540.515	6.69666	97.4848
-Spot 119	157.268	28487.9	3.03775	16.8862	0.597779	0.714036	2.50105	0.0874862	2.42857	0.971017	540.653	12.5946	547.14	10.5796	574.239	13.0153	540.653	12.5946	94.1512
-Spot 133	208.515	300429	1.14484	17.0718	0.7438	0.706309	1.2394	0.0874908	0.991403	0.799904	540.68	5.14169	542.552	5.20934	550.445	16.2569	540.68	5.14169	98.226
-Spot 154	46.8527	779258	1.60666	17.2865	1.28603	0.697716	1.70156	0.0875132	1.1142	0.654809	540.813	5.77988	537.426	7.10064	523.059	28.1957	540.813	5.77988	103.394
-Spot 8	183.748	66428.2	1.78772	17.2403	0.74114	0.699977	2.7357	0.0875619	2.6334	0.962604	541.102	13.6677	538.777	11.4382	528.972	16.2293	541.102	13.6677	102.293
-Spot 122	75.4683	19194.3	1.31391	17.173	1.19782	0.70275	1.66782	0.0875659	1.16053	0.69584	541.125	6.02359	540.432	6.98933	537.51	26.1989	541.125	6.02359	100.673
-Spot 79	99.1371	52855	1.4619	16.815	0.75929	0.719146	1.29176	0.0877407	1.04504	0.809009	542.161	5.43411	550.163	5.4868	583.411	16.4646	542.161	5.43411	92.9296
-Spot 189	26.5404	21469.7	0.943607	16.8187	1.26957	0.719016	1.53679	0.0877442	0.865973	0.563495	542.182	4.50313	550.086	6.52692	582.928	27.5466	542.182	4.50313	93.0101
-Spot 41	159.797	104224	1.72338	16.8323	0.829381	0.718545	1.42864	0.0877575	1.16325	0.814234	542.261	6.04984	549.808	6.0653	581.206	18.0142	542.261	6.04984	93.2993
-Spot 148	291.917	238267	3.38583	16.998	0.70788	0.711644	1.37876	0.0877705	1.18317	0.85814	542.338	6.15428	545.722	5.82068	559.899	15.4151	542.338	6.15428	96.8635
-Spot 314	67.9146	19634.2	2.838	16.9654	1.13783	0.713143	1.55282	0.0877864	1.0567	0.680502	542.432	5.49736	546.611	6.56359	564.046	24.7855	542.432	5.49736	96.1682
-Spot 310	164.406	74415.3	2.29766	17.0797	0.777944	0.708601	1.1676	0.087815	0.870687	0.745706	542.602	4.531	543.915	4.91687	549.418	17.0086	542.602	4.531	98.7594
-Spot 88	55.3899	223583	1.66859	16.8476	0.955369	0.718373	1.61865	0.0878164	1.30664	0.807239	542.61	6.79978	549.706	6.87105	579.199	20.7359	542.61	6.79978	93.6829
-Spot 30	40.4294	17576.5	1.72954	17.1195	1.5366	0.707606	1.75695	0.087896	0.851908	0.484878	543.082	4.43703	543.324	7.39268	544.331	33.5632	543.082	4.43703	99.7704
-Spot 195	55.0096	29211.9	1.54564	17.1554	1.04043	0.706184	1.45567	0.0879038	1.01808	0.699388	543.128	5.30293	542.478	6.11772	539.729	22.757	543.128	5.30293	100.63
-Spot 94	96.1763	37684.1	1.43403	16.9432	0.767438	0.715197	1.16904	0.0879241	0.881875	0.754355	543.248	4.59446	547.827	4.94966	566.938	16.6962	543.248	4.59446	95.8214
-Spot 184	75.8713	200634	1.79297	16.8144	0.737487	0.720788	1.24836	0.0879382	1.00723	0.806843	543.332	5.2483	551.132	5.30949	583.481	15.9905	543.332	5.2483	93.119
-Spot 207	126.653	32595.4	0.87663	16.9247	0.83684	0.716124	1.2601	0.087942	0.942101	0.747639	543.354	4.90915	548.376	5.33924	569.316	18.2236	543.354	4.90915	95.4398
-Spot 218	99.7061	53328.3	1.06885	16.9735	0.944437	0.71477	1.36486	0.088029	0.985332	0.721929	543.87	5.13909	547.575	5.77674	563.001	20.5551	543.87	5.13909	96.6019
-Spot 204	54.2501	295691	2.69845	17.1646	0.927754	0.707304	1.28988	0.08809	0.896142	0.694747	544.231	4.67689	543.144	5.426	538.564	20.2997	544.231	4.67689	101.052
-Spot 33	72.5188	170844	1.35134	16.2189	1.49155	0.748552	1.88286	0.0880912	1.1491	0.610297	544.238	5.99714	567.384	8.18465	661.255	31.9635	544.238	5.99714	82.3038
-Spot 84	60.0138	43352.3	1.93071	16.9245	1.08668	0.717488	1.71049	0.0881085	1.32094	0.77226	544.341	6.8952	549.183	7.25567	569.341	23.6708	544.341	6.8952	95.609
-Spot 114	61.66	58291.6	1.06187	16.9695	0.849363	0.715752	1.33802	0.0881289	1.03387	0.772685	544.462	5.39787	548.156	5.66769	563.519	18.4948	544.462	5.39787	96.6181
-Spot 12	78.3158	97867	2.47095	17.0067	1.23041	0.714578	2.1129	0.0881772	1.71768	0.81295	544.748	8.97259	547.461	8.94154	558.788	26.8264	544.748	8.97259	97.4874
-Spot 115	124.843	66229.1	2.35246	17.1068	0.788273	0.71046	1.28448	0.088185	1.01416	0.789547	544.794	5.29805	545.019	5.41737	545.939	17.2023	544.794	5.29805	99.7904
-Spot 28	250.935	206841	4.97607	17.0552	0.461593	0.712864	1.21	0.0882168	1.11849	0.924376	544.982	5.84504	546.446	5.11331	552.551	10.0532	544.982	5.84504	98.6302
-Spot 161	110.365	58248.7	1.98863	16.7763	0.83783	0.724734	2.03595	0.0882189	1.85557	0.911402	544.995	9.6971	553.458	8.6869	588.408	18.1653	544.995	9.6971	92.6219
-Spot 295	51.9165	22748.7	1.63013	17.243	0.957551	0.705279	1.40175	0.0882393	1.02372	0.730314	545.116	5.35101	541.939	5.88668	528.62	20.9626	545.116	5.35101	103.121
-Spot 249	113.296	29603	1.10287	17.1113	0.917677	0.710847	1.37736	0.0882564	1.02713	0.745722	545.217	5.3698	545.249	5.81095	545.362	20.0522	545.217	5.3698	99.9735
-Spot 74	184.454	102305	2.18835	17.1296	0.804179	0.710179	1.49638	0.0882677	1.26192	0.843316	545.284	6.59805	544.853	6.30961	543.033	17.5575	545.284	6.59805	100.415
-Spot 4	84.1799	99518.8	1.195	17.0366	0.961841	0.714108	1.30208	0.0882745	0.877658	0.674041	545.324	4.58924	547.183	5.50806	554.951	20.9963	545.324	4.58924	98.2653
-Spot 180	95.1013	96131.8	1.15119	17.028	1.02555	0.714563	1.40149	0.0882859	0.955215	0.68157	545.392	4.99537	547.452	5.93079	556.044	22.3728	545.392	4.99537	98.0842
-Spot 191	100.433	266514	3.83911	17.1507	0.91048	0.709575	1.43657	0.0883016	1.1112	0.773508	545.485	5.81205	544.494	6.05441	540.334	19.9131	545.485	5.81205	100.953
-Spot 224	116.526	189133	3.4091	16.8792	0.922698	0.721045	1.34581	0.0883086	0.979713	0.727972	545.526	5.12469	551.284	5.72518	575.121	20.0442	545.526	5.12469	94.8542
-Spot 241	116.253	169695	1.07012	16.8901	0.86402	0.720598	1.31077	0.0883105	0.985692	0.751995	545.538	5.15608	551.02	5.5741	573.74	18.7902	545.538	5.15608	95.0844
-Spot 267	42.4606	8873.8	1.52816	17.3006	0.899847	0.704261	1.17288	0.0884061	0.752285	0.641398	546.104	3.93905	541.333	4.92137	521.269	19.7344	546.104	3.93905	104.764
-Spot 294	48.3223	13865.8	0.957234	17.2884	0.908754	0.704768	1.26495	0.0884073	0.879924	0.695619	546.111	4.60744	541.635	5.30992	522.817	19.9326	546.111	4.60744	104.455
-Spot 247	51.6334	34205.5	1.07728	16.983	1.16404	0.717563	1.46713	0.0884226	0.893023	0.608687	546.201	4.67678	549.227	6.22374	561.777	25.3699	546.201	4.67678	97.2274
-Spot 143	80.7651	21733.4	2.20127	17.1438	1.15959	0.710995	1.5822	0.0884424	1.07643	0.680338	546.319	5.63846	545.337	6.67599	541.237	25.378	546.319	5.63846	100.939
-Spot 268	116.497	31122.7	1.49719	17.2794	0.80833	0.705473	1.37072	0.08845	1.10701	0.807612	546.364	5.79906	542.055	5.75728	523.954	17.7403	546.364	5.79906	104.277
-Spot 47	110.858	103163	3.35268	16.9783	0.858812	0.718464	1.40757	0.0885089	1.11521	0.792294	546.712	5.84559	549.76	5.97542	562.386	18.7174	546.712	5.84559	97.213
-Spot 70	112.969	99334.5	0.820608	17.0496	0.804064	0.71553	1.28403	0.0885176	1.0011	0.779659	546.764	5.24797	548.025	5.43799	553.271	17.5678	546.764	5.24797	98.8239
-Spot 57	90.4879	36140.3	1.12159	16.7841	1.77427	0.726983	2.15574	0.0885339	1.22441	0.567979	546.86	6.41969	554.781	9.21455	587.42	38.4799	546.86	6.41969	93.0953
-Spot 135	243.821	115603	7.30475	16.9128	0.689648	0.721658	1.17456	0.0885594	0.95078	0.809476	547.011	4.98633	551.645	4.99913	570.802	15.0113	547.011	4.98633	95.832
-Spot 253	61.2258	95794.7	2.47692	17.0244	0.836212	0.716962	1.52328	0.0885639	1.27324	0.835853	547.038	6.67778	548.872	6.45881	556.476	18.2521	547.038	6.67778	98.3039
-Spot 123	53.0562	63660.7	1.41879	17.1403	1.03118	0.712155	1.45134	0.0885686	1.0213	0.703696	547.066	5.35668	546.025	6.12964	541.661	22.5473	547.066	5.35668	100.998
-Spot 280	90.2729	91901.7	0.972269	16.9661	0.868339	0.72039	1.18765	0.0886822	0.810241	0.682224	547.739	4.25469	550.897	5.04965	563.955	18.9003	547.739	4.25469	97.1246
-Spot 150	56.651	23576.6	1.52046	16.9287	1.2874	0.722052	1.63088	0.0886913	1.00119	0.613896	547.793	5.2579	551.878	6.94355	568.794	28.0425	547.793	5.2579	96.3077
-Spot 48	219.085	96066.9	1.01754	17.0164	0.719433	0.718436	1.2746	0.0887041	1.05215	0.825476	547.868	5.52626	549.743	5.41083	557.511	15.6973	547.868	5.52626	98.2705
-Spot 75	83.8624	25052	1.29305	16.9886	1.08121	0.719747	1.29231	0.088721	0.707846	0.547736	547.969	3.71849	550.518	5.49183	561.085	23.5649	547.969	3.71849	97.6623
-Spot 165	71.9174	23973.8	2.14108	17.289	1.06325	0.707281	1.67855	0.0887257	1.29886	0.773799	547.996	6.82357	543.13	7.06088	522.741	23.3029	547.996	6.82357	104.831
-Spot 127	122.418	69630.8	2.55779	16.9662	0.900252	0.72078	1.34838	0.0887311	1.00383	0.74447	548.028	5.2739	551.127	5.73486	563.934	19.6105	548.028	5.2739	97.1795
-Spot 283	58.547	23146.1	1.67316	17.2208	1.23561	0.710296	1.79771	0.0887527	1.30577	0.726352	548.156	6.8618	544.922	7.581	531.441	27.0749	548.156	6.8618	103.145
-Spot 232	77.4448	91273.7	0.871059	16.9996	1.07931	0.719582	1.5871	0.0887581	1.16361	0.733165	548.188	6.11506	550.42	6.74369	559.668	23.5252	548.188	6.11506	97.9487
-Spot 209	60.5603	18053.8	2.24143	16.9219	1.27626	0.722926	1.58264	0.088763	0.935909	0.591358	548.217	4.9187	552.393	6.7429	569.643	27.7744	548.217	4.9187	96.2387
-Spot 307	79.5382	316321	1.78454	17.2433	1.06577	0.709622	1.43977	0.0887841	0.96803	0.67235	548.342	5.08862	544.522	6.06813	528.586	23.3561	548.342	5.08862	103.738
-Spot 288	99.0304	96773.4	1.05514	16.9548	0.875636	0.721847	1.51987	0.0888025	1.24229	0.817362	548.451	6.53155	551.757	6.46984	565.447	19.0906	548.451	6.53155	96.9942
-Spot 151	91.9309	39392.2	1.71065	17.1413	0.785825	0.714491	1.42462	0.0888644	1.18829	0.834108	548.817	6.25165	547.41	6.02833	541.572	17.2013	548.817	6.25165	101.338
-Spot 141	110.759	224065	2.0064	16.9328	0.853184	0.723478	1.51209	0.0888877	1.2484	0.82561	548.955	6.56947	552.718	6.44516	568.272	18.564	548.955	6.56947	96.6007
-Spot 226	237.732	664596	4.54051	17.0699	0.759442	0.717735	1.44218	0.0888961	1.22602	0.850117	549.005	6.45227	549.329	6.11874	550.659	16.5938	549.005	6.45227	99.6996
-Spot 156	72.9438	16985	1.8938	16.969	1.23818	0.722006	1.6087	0.0888963	1.02706	0.638439	549.007	5.40519	551.85	6.84887	563.582	26.9681	549.007	5.40519	97.4138
-Spot 315	119.392	214241	1.30835	16.7776	0.770203	0.7305	1.25545	0.088928	0.991431	0.789703	549.194	5.21939	556.847	5.38123	588.255	16.7049	549.194	5.21939	93.3598
-Spot 233	94.7274	60430.3	2.10388	17.1809	0.744552	0.713398	1.14511	0.0889334	0.870011	0.759762	549.226	4.58043	546.762	4.84121	536.504	16.2942	549.226	4.58043	102.371
-Spot 266	123.606	109142	4.82536	16.9863	0.807522	0.721679	1.30583	0.088947	1.02621	0.785867	549.307	5.40356	551.658	5.55795	561.356	17.6044	549.307	5.40356	97.8536
-Spot 23	88.977	36246.6	1.61728	16.9578	0.786637	0.72297	1.3603	0.0889566	1.10979	0.815838	549.364	5.84421	552.419	5.7958	565.013	17.1114	549.364	5.84421	97.2302
-Spot 264	116.103	345894	3.08713	16.9074	0.962994	0.725165	1.52448	0.0889616	1.18181	0.775223	549.393	6.22381	553.711	6.50674	571.524	20.959	549.393	6.22381	96.1277
-Spot 203	69.1672	92010.2	1.49128	16.6653	0.840404	0.735704	1.37691	0.0889616	1.09069	0.792129	549.393	5.74396	559.895	5.9261	602.795	18.1661	549.393	5.74396	91.1409
-Spot 239	154.358	117902	1.24856	16.9098	1.00254	0.725212	1.37888	0.0889799	0.946686	0.686563	549.501	4.98651	553.739	5.88549	571.209	21.8145	549.501	4.98651	96.1997
-Spot 2	88.6379	110950	1.03717	17.0401	0.709571	0.720071	1.2606	0.0890296	1.04194	0.826537	549.796	5.49103	550.709	5.35848	554.465	15.4779	549.796	5.49103	99.1578
-Spot 20	184.088	841244	3.94895	17.1496	0.779359	0.7156	1.74609	0.0890455	1.56251	0.894861	549.889	8.23583	548.066	7.39536	540.495	17.0437	549.889	8.23583	101.738
-Spot 246	119.519	105755	2.83536	16.9982	1.17987	0.722042	1.52983	0.0890542	0.973797	0.636539	549.941	5.13324	551.872	6.51325	559.869	25.7373	549.941	5.13324	98.2267
-Spot 258	79.5292	24239.1	3.66285	16.7957	1.06082	0.73092	1.41236	0.0890751	0.932429	0.660192	550.065	4.91624	557.093	6.05583	585.904	23.0224	550.065	4.91624	93.8831
-Spot 138	61.0978	79484.1	1.27606	17.1775	0.721439	0.714949	1.17216	0.0891094	0.923845	0.788155	550.268	4.8727	547.681	4.96186	536.953	15.795	550.268	4.8727	102.48
-Spot 50	153.535	174864	2.07951	17.0417	0.7194	0.72099	1.08393	0.0891517	0.810782	0.748002	550.518	4.27823	551.251	4.61089	554.261	15.7112	550.518	4.27823	99.3247
-Spot 175	51.4899	70694.5	1.74816	17.0631	1.24473	0.72047	1.46335	0.0891993	0.769441	0.525807	550.8	4.06207	550.944	6.22233	551.562	27.1795	550.8	4.06207	99.8619
-Spot 211	86.1023	32040.6	1.42973	16.9924	1.41048	0.723492	1.62582	0.0892025	0.808591	0.497345	550.819	4.26889	552.727	6.92999	560.592	30.7349	550.819	4.26889	98.2565
-Spot 186	240.166	82773.7	1.6469	16.9865	0.722435	0.723895	1.01762	0.0892212	0.716688	0.704277	550.93	3.78443	552.964	4.33894	561.329	15.7541	550.93	3.78443	98.1474
-Spot 51	155.677	45047.9	5.3778	16.7098	0.760592	0.736006	1.41762	0.089236	1.1963	0.843882	551.017	6.31795	560.072	6.10273	597.019	16.476	551.017	6.31795	92.2947
-Spot 311	167.043	138521	1.43729	17.1662	1.41308	0.716552	1.93784	0.0892505	1.32606	0.684299	551.103	7.00429	548.629	8.21386	538.349	30.9155	551.103	7.00429	102.369
-Spot 166	83.8702	34713.6	3.98096	17.1605	0.858682	0.716839	1.24251	0.0892563	0.898052	0.722772	551.138	4.74383	548.799	5.26776	539.126	18.7938	551.138	4.74383	102.228
-Spot 129	369.08	100566	2.31238	16.8336	0.789218	0.730941	1.79675	0.0892784	1.61414	0.898367	551.268	8.52842	557.105	7.70419	581.025	17.1572	551.268	8.52842	94.8787
-Spot 193	106.739	41291.6	1.37353	16.9274	0.897824	0.727096	1.44816	0.0893037	1.13626	0.784621	551.418	6.00503	554.848	6.19052	568.966	19.5231	551.418	6.00503	96.9158
-Spot 90	101.126	31245.3	1.28349	16.9979	0.980479	0.724092	1.64542	0.0893051	1.32138	0.80307	551.426	6.98351	553.079	7.01691	559.913	21.3757	551.426	6.98351	98.4842
-Spot 238	63.2657	82436	2.21058	17.1524	1.06561	0.717588	1.3838	0.0893074	0.882825	0.637972	551.44	4.66584	549.242	5.87034	540.15	23.3063	551.44	4.66584	102.09
-Spot 54	42.34	158340	1.9884	16.7205	0.978716	0.736192	1.57288	0.0893157	1.23128	0.782821	551.489	6.50803	560.181	6.77211	595.669	21.2014	551.489	6.50803	92.5831
-Spot 137	188.099	163022	3.79075	16.8558	0.744794	0.730664	1.21173	0.0893625	0.955805	0.788796	551.766	5.05441	556.943	5.1945	578.167	16.1847	551.766	5.05441	95.4336
-Spot 107	105.629	71545.2	3.274	16.829	0.975851	0.732015	1.41327	0.0893853	1.02227	0.723338	551.901	5.40715	557.735	6.06495	581.617	21.1902	551.901	5.40715	94.8908
-Spot 301	478.99	92489.1	3.80553	16.5971	0.554149	0.742332	2.84675	0.0893963	2.7923	0.980871	551.966	14.7711	563.766	12.316	611.651	11.9745	551.966	14.7711	90.2419
-Spot 260	74.2695	57184	1.51708	17.1082	0.698207	0.720171	1.25347	0.0893978	1.041	0.830499	551.975	5.50694	550.768	5.32857	545.759	15.2509	551.975	5.50694	101.139
-Spot 277	85.0871	17767.6	3.58406	17.1182	0.944692	0.720238	1.33146	0.0894584	0.938269	0.704691	552.333	4.96657	550.807	5.66045	544.506	20.6665	552.333	4.96657	101.438
-Spot 82	112.843	239125	4.81783	16.7925	1.11087	0.734723	1.43335	0.0895216	0.905788	0.63194	552.707	4.79774	559.321	6.16424	586.348	24.1076	552.707	4.79774	94.2626
-Spot 251	112.415	33707.9	1.98934	16.9147	0.960266	0.729559	1.41817	0.0895391	1.04359	0.735875	552.811	5.52866	556.294	6.07418	570.57	20.8794	552.811	5.52866	96.8876
-Spot 303	54.7095	94498.1	1.02806	17.0127	0.845454	0.725388	1.24039	0.0895428	0.907622	0.731722	552.833	4.8085	553.842	5.29512	557.976	18.4344	552.833	4.8085	99.0782
-Spot 202	93.3669	52998.7	0.953725	16.9659	1.02722	0.727404	1.52553	0.0895446	1.12785	0.739321	552.843	5.97538	555.029	6.52285	563.982	22.3766	552.843	5.97538	98.025
-Spot 188	131.823	1.21373e+06	2.43898	16.9718	0.784358	0.727234	1.08716	0.0895549	0.752793	0.69244	552.904	3.98872	554.929	4.64782	563.223	17.1088	552.904	3.98872	98.1679
-Spot 69	80.9723	39738.3	1.31618	17.0826	0.986906	0.722591	1.77926	0.0895643	1.48046	0.832068	552.96	7.8451	552.195	7.57857	549.027	21.5393	552.96	7.8451	100.716
-Spot 250	153.858	94998.7	1.56346	17.065	0.674951	0.723361	1.09205	0.0895673	0.8585	0.786133	552.978	4.5494	552.649	4.65432	551.277	14.7502	552.978	4.5494	100.309
-Spot 236	132.285	105353	1.07732	16.8156	0.637592	0.734176	1.3833	0.0895776	1.2276	0.887441	553.038	6.50601	559.001	5.94645	583.333	13.8447	553.038	6.50601	94.8067
-Spot 155	240.515	55869.4	1.69881	16.6891	1.04354	0.739815	1.41932	0.0895868	0.962025	0.677806	553.093	5.09903	562.298	6.12825	599.699	22.5955	553.093	5.09903	92.2284
-Spot 136	146.879	22189.3	3.68168	17.0326	0.631292	0.725191	1.10491	0.0896231	0.90681	0.820707	553.308	4.80815	553.727	4.71603	555.47	13.7826	553.308	4.80815	99.6107
-Spot 286	166.867	38702.8	3.77965	16.8874	0.639859	0.731464	1.13332	0.0896278	0.935417	0.825375	553.336	4.96008	557.412	4.86146	574.072	13.9243	553.336	4.96008	96.3879
-Spot 214	173.972	137513	3.09074	16.9751	0.749593	0.728015	1.28309	0.0896686	1.04136	0.811603	553.577	5.52415	555.388	5.48889	562.796	16.3314	553.577	5.52415	98.3619
-Spot 112	73.2195	102063	1.84799	17.0008	0.847731	0.726962	1.38368	0.0896746	1.09358	0.790342	553.613	5.8015	554.768	5.91422	559.501	18.4786	553.613	5.8015	98.9475
-Spot 34	91.1536	41939	1.72644	17.1025	0.862427	0.722798	1.16868	0.0896944	0.788688	0.674855	553.729	4.18489	552.317	4.97864	546.478	18.8421	553.729	4.18489	101.327
-Spot 55	62.3863	78416.9	2.10396	17.1952	1.14855	0.719051	1.47833	0.089713	0.930746	0.629594	553.839	4.93961	550.106	6.27881	534.691	25.1554	553.839	4.93961	103.581
-Spot 149	97.6293	139218	0.926183	17.1282	1.37665	0.721887	3.44491	0.0897158	3.15789	0.916682	553.856	16.7599	551.78	14.6657	543.212	30.1005	553.856	16.7599	101.96
-Spot 108	79.9749	44525.3	3.49862	17.0601	0.930458	0.724984	1.33777	0.0897423	0.961189	0.718499	554.013	5.1027	553.605	5.709	551.932	20.2887	554.013	5.1027	100.377
-Spot 228	36.866	15314.6	1.32866	17.1039	1.02168	0.723295	1.53426	0.0897631	1.1446	0.74603	554.136	6.0777	552.61	6.53869	546.309	22.3428	554.136	6.0777	101.433
-Spot 113	48.7922	84454.2	1.33289	16.9515	1.29722	0.7298	1.70099	0.0897636	1.10026	0.646836	554.139	5.84227	556.436	7.28697	565.866	28.2581	554.139	5.84227	97.9275
-Spot 87	65.0992	37014.3	1.68754	16.8884	0.973848	0.732612	1.6686	0.0897738	1.35493	0.812017	554.199	7.19529	558.085	7.16409	573.985	21.1907	554.199	7.19529	96.553
-Spot 197	59.8662	41181.5	1.63502	17.1209	0.902676	0.722774	1.15515	0.0897878	0.72079	0.623982	554.282	3.82827	552.303	4.9209	544.151	19.7289	554.282	3.82827	101.862
-Spot 1	89.1048	66734.5	1.98582	16.9467	0.809214	0.730456	1.30555	0.0898188	1.02451	0.784738	554.465	5.44313	556.821	5.59578	566.483	17.6247	554.465	5.44313	97.8786
-Spot 177	71.6826	268575	1.40408	16.8928	2.33143	0.73309	3.40693	0.0898559	2.48426	0.729181	554.685	13.2036	558.365	14.6339	573.418	50.7102	554.685	13.2036	96.7331
-Spot 290	78.1309	27511.7	1.75428	17.0613	1.02346	0.72593	1.35483	0.0898657	0.887747	0.655247	554.743	4.71877	554.162	5.78616	551.764	22.3352	554.743	4.71877	100.54
-Spot 219	52.2875	93444	1.52577	16.922	0.9275	0.731907	1.4012	0.089866	1.05028	0.749562	554.745	5.58273	557.672	6.01264	569.637	20.1872	554.745	5.58273	97.3856
-Spot 91	92.8102	50622.2	3.72072	16.9774	0.962611	0.729693	1.83895	0.0898875	1.56688	0.852052	554.872	8.33052	556.373	7.87734	562.501	20.964	554.872	8.33052	98.6437
-Spot 97	57.6865	66915	1.59228	16.9837	0.737775	0.729485	1.14301	0.0898952	0.873017	0.763788	554.917	4.64187	556.251	4.89534	561.693	16.0763	554.917	4.64187	98.7938
-Spot 98	252.045	236323	4.97265	16.9839	0.841986	0.729498	1.46804	0.089898	1.20259	0.819176	554.934	6.39439	556.259	6.28751	561.662	18.3685	554.934	6.39439	98.8021
-Spot 67	207.692	87698.3	0.896163	17.0536	0.758021	0.726551	1.50423	0.0899022	1.29927	0.863747	554.959	6.90879	554.527	6.42742	552.749	16.5454	554.959	6.90879	100.4
-Spot 36	207.857	71125.1	1.5992	17.1016	0.663343	0.724686	1.32711	0.0899239	1.14943	0.866117	555.087	6.11335	553.43	5.66213	546.596	14.4713	555.087	6.11335	101.553
-Spot 61	95.1027	37145	2.32671	17.0911	0.903529	0.725236	1.49076	0.0899367	1.18575	0.795399	555.163	6.30734	553.753	6.36317	547.984	19.7344	555.163	6.30734	101.31
-Spot 111	80.5032	15301.7	4.03518	17.1722	0.835032	0.722108	1.32176	0.0899737	1.02458	0.775165	555.382	5.4521	551.91	5.62766	537.625	18.2723	555.382	5.4521	103.303
-Spot 146	173.47	59684.8	2.00409	16.5042	0.731739	0.751694	1.23501	0.0900169	0.994888	0.805572	555.637	5.29643	569.207	5.38129	623.77	15.801	555.637	5.29643	89.0773
-Spot 178	277.796	103224	0.85167	16.9124	0.632624	0.733969	1.14472	0.090068	0.954033	0.833418	555.939	5.08158	558.88	4.92006	570.896	13.7777	555.939	5.08158	97.3802
-Spot 11	212.161	7.07605e+06	1.88384	17.1283	0.621337	0.724788	1.37286	0.090077	1.2242	0.89172	555.993	6.52122	553.49	5.85781	543.199	13.5827	555.993	6.52122	102.355
-Spot 77	78.8953	34467.3	1.76698	17.1968	0.968015	0.72209	1.74431	0.0901002	1.45106	0.83188	556.13	7.73147	551.9	7.42672	534.492	21.2039	556.13	7.73147	104.048
-Spot 289	112.876	71424.4	1.45723	17.1049	0.740506	0.725976	1.31281	0.0901014	1.08402	0.825731	556.137	5.77593	554.189	5.60689	546.172	16.1582	556.137	5.77593	101.824
-Spot 225	85.9545	72685.2	4.35012	17.0016	1.03333	0.730482	1.51326	0.0901128	1.10552	0.730556	556.204	5.89115	556.836	6.48622	559.419	22.513	556.204	5.89115	99.4253
-Spot 38	113.96	106267	5.59993	17.096	0.841688	0.72651	1.30938	0.0901207	1.00301	0.766021	556.251	5.34533	554.503	5.59464	547.353	18.3861	556.251	5.34533	101.626
-Spot 272	76.3758	64419.3	1.7977	16.937	0.89321	0.73369	1.25383	0.0901649	0.87992	0.701787	556.512	4.69145	558.717	5.38782	567.727	19.444	556.512	4.69145	98.0246
-Spot 254	85.7066	103548	1.74042	16.9064	1.05459	0.735236	1.47983	0.0901915	1.03814	0.701527	556.669	5.53652	559.621	6.36671	571.643	22.9449	556.669	5.53652	97.3806
-Spot 37	38.6879	24866.6	0.79965	16.8692	1.14041	0.736978	1.6818	0.0902061	1.23609	0.734978	556.756	6.59317	560.641	7.24556	576.461	24.7785	556.756	6.59317	96.5817
-Spot 179	103.714	227252	2.20099	16.8859	0.718797	0.736395	1.21216	0.0902244	0.976048	0.805212	556.864	5.20712	560.3	5.21984	574.279	15.635	556.864	5.20712	96.9675
-Spot 71	120.188	74522.5	1.78909	17.1121	0.730107	0.726779	1.14448	0.090239	0.881353	0.770089	556.95	4.70263	554.661	4.89112	545.254	15.933	556.95	4.70263	102.145
-Spot 117	91.5292	22428.5	1.03836	16.3692	1.79003	0.759955	2.34249	0.0902618	1.51098	0.64503	557.085	8.06398	573.984	10.2709	641.499	38.4911	557.085	8.06398	86.8411
-Spot 68	207.967	38569.4	1.78904	17.0294	0.666172	0.730617	1.24457	0.0902771	1.05127	0.844686	557.176	5.61143	556.915	5.33509	555.854	14.5343	557.176	5.61143	100.238
-Spot 66	93.6219	99936	3.66233	17.0131	0.790881	0.73162	1.49561	0.0903144	1.26939	0.848744	557.396	6.77825	557.504	6.41631	557.941	17.2328	557.396	6.77825	99.9024
-Spot 220	104.555	331935	1.58935	17.0139	0.628075	0.731902	1.33143	0.0903537	1.17398	0.881744	557.628	6.27132	557.669	5.71326	557.838	13.6935	557.628	6.27132	99.9624
-Spot 21	124.779	107284	1.02231	16.8892	0.735262	0.737324	1.32661	0.0903558	1.10421	0.832357	557.641	5.89875	560.843	5.71684	573.834	15.9862	557.641	5.89875	97.1782
-Spot 35	58.4411	31890	1.31565	17.0072	0.845686	0.732332	1.43119	0.0903708	1.15461	0.806748	557.73	6.16891	557.921	6.14342	558.68	18.4295	557.73	6.16891	99.8298
-Spot 259	141.702	112066	1.31614	17.0672	0.808623	0.730473	1.73021	0.0904595	1.52963	0.88407	558.254	8.17993	556.831	7.41612	551.037	17.6707	558.254	8.17993	101.31
-Spot 130	77.5855	80663.1	1.82372	17.0305	1.25073	0.732228	1.69277	0.0904819	1.14068	0.673851	558.387	6.10132	557.86	7.26569	555.715	27.2622	558.387	6.10132	100.481
-Spot 273	71.2612	28555	1.96585	17.0843	0.895835	0.729953	1.27352	0.0904858	0.905171	0.710763	558.409	4.84183	556.526	5.45633	548.829	19.5642	558.409	4.84183	101.746
-Spot 10	72.3985	22725.9	2.12869	17.1909	0.973754	0.725791	1.37249	0.0905309	0.967228	0.704725	558.676	5.17614	554.08	5.86094	535.215	21.3276	558.676	5.17614	104.383
-Spot 92	172.855	35231.9	3.3634	17.1069	0.970864	0.729599	1.42507	0.0905616	1.0432	0.73203	558.858	5.58443	556.318	6.10396	545.918	21.2332	558.858	5.58443	102.37
-Spot 158	68.8451	968728	2.19846	16.9914	1.09338	0.734644	1.51095	0.0905718	1.04282	0.690177	558.918	5.583	559.275	6.49759	560.749	23.8302	558.918	5.583	99.6735
-Spot 223	85.5771	236640	3.0817	17.0399	0.795541	0.732613	1.46702	0.0905796	1.23259	0.840196	558.964	6.59946	558.086	6.29861	554.484	17.3484	558.964	6.59946	100.808
-Spot 153	44.4229	11912.8	0.947795	16.9901	1.18256	0.734827	1.44368	0.0905875	0.828104	0.573607	559.011	4.43416	559.382	6.20919	560.884	25.7875	559.011	4.43416	99.6661
-Spot 49	87.7533	247914	1.96688	17.0364	1.15937	0.73308	1.55662	0.0906184	1.03871	0.667287	559.193	5.56361	558.359	6.68577	554.982	25.2722	559.193	5.56361	100.759
-Spot 15	106.752	43482.6	2.88175	16.9993	0.837611	0.734684	1.3073	0.0906191	1.00372	0.767777	559.198	5.37621	559.299	5.622	559.696	18.2576	559.198	5.37621	99.911
-Spot 167	89.4751	76221.8	1.92612	17.0501	0.740855	0.732535	1.15908	0.0906238	0.891405	0.769062	559.225	4.77486	558.04	4.97615	553.211	16.1819	559.225	4.77486	101.087
-Spot 93	94.7338	113958	0.574588	16.9359	0.739971	0.737969	1.06905	0.0906846	0.77157	0.721731	559.585	4.1355	561.22	4.60923	567.874	16.1253	559.585	4.1355	98.5403
-Spot 62	163.856	77143.6	1.48288	16.8417	1.19803	0.742503	1.54173	0.0907345	0.970384	0.629412	559.879	5.20373	563.865	6.67066	579.971	26.0177	559.879	5.20373	96.5358
-Spot 255	268.224	83288	1.97208	16.9332	0.595169	0.738831	1.28833	0.0907762	1.14261	0.886896	560.126	6.12991	561.723	5.55839	568.218	12.9515	560.126	6.12991	98.5759
-Spot 85	250.392	721039	2.02432	16.8051	0.638992	0.744672	1.13572	0.0908018	0.938908	0.826707	560.278	5.03837	565.128	4.92216	584.723	13.8636	560.278	5.03837	95.8194
-Spot 200	115.261	48883.8	1.52918	16.9616	0.896266	0.738185	1.19641	0.0908487	0.792527	0.662422	560.554	4.25487	561.346	5.1592	564.534	19.5215	560.554	4.25487	99.295
-Spot 83	134.395	102602	1.96691	17.0656	0.704129	0.733716	1.33132	0.0908525	1.12987	0.848686	560.577	6.06621	558.732	5.72092	551.2	15.3775	560.577	6.06621	101.701
-Spot 157	89.2059	130971	2.27319	16.9549	0.823246	0.738961	1.29951	0.0909084	1.00548	0.773738	560.908	5.4014	561.799	5.60718	565.431	17.9076	560.908	5.4014	99.1999
-Spot 63	274.054	110460	2.27895	16.7702	0.853748	0.747143	1.22441	0.090914	0.877668	0.716807	560.94	4.71508	566.565	5.31664	589.228	18.5183	560.94	4.71508	95.1992
-Spot 212	72.5023	35408.7	1.72614	17.1402	1.14482	0.731547	1.49539	0.0909798	0.962078	0.643361	561.329	5.17198	557.461	6.41503	541.673	25.0536	561.329	5.17198	103.629
-Spot 76	65.8326	37573.5	1.80378	17.0683	1.0873	0.734956	1.50994	0.0910206	1.04772	0.693879	561.57	5.63467	559.458	6.49484	550.875	23.7264	561.57	5.63467	101.941
-Spot 252	120.449	80506.7	2.04404	17.0372	0.709906	0.73635	1.4217	0.0910268	1.23178	0.866409	561.607	6.62498	560.273	6.12197	554.882	15.4771	561.607	6.62498	101.212
-Spot 59	262.744	83833	4.77701	16.9131	0.922793	0.741786	1.30076	0.0910312	0.91675	0.70478	561.633	4.93086	563.447	5.62491	570.759	20.0622	561.633	4.93086	98.401
-Spot 198	119.305	113883	2.27809	16.967	0.902067	0.739484	1.33266	0.0910378	0.980954	0.736085	561.672	5.27654	562.104	5.75259	563.833	19.6404	561.672	5.27654	99.6167
-Spot 25	98.4283	40506.6	1.91657	16.9977	0.875894	0.738315	1.18908	0.0910586	0.80419	0.676313	561.795	4.32663	561.422	5.12812	559.932	19.0922	561.795	4.32663	100.333
-Spot 306	136.24	49848.8	4.68055	16.9943	0.812253	0.73899	1.19683	0.0911233	0.879003	0.734443	562.177	4.73221	561.816	5.16425	560.354	17.706	562.177	4.73221	100.325
-Spot 80	73.9581	361385	1.43082	17.0075	0.968177	0.73842	1.54379	0.0911235	1.20247	0.778905	562.178	6.47363	561.483	6.65845	558.651	21.1122	562.178	6.47363	100.631
-Spot 243	89.9715	1.80888e+06	1.22886	17.0465	0.81032	0.736841	1.33121	0.0911377	1.05618	0.793394	562.262	5.68687	560.561	5.7345	553.64	17.6944	562.262	5.68687	101.557
-Spot 181	140.991	59532	4.61294	16.9658	0.712958	0.740753	1.06671	0.0911878	0.793451	0.743829	562.558	4.2744	562.845	4.6091	563.985	15.5306	562.558	4.2744	99.747
-Spot 237	137.441	111685	3.95573	17.032	0.655402	0.738308	1.26327	0.091241	1.07995	0.854886	562.873	5.82091	561.418	5.44803	555.546	14.2958	562.873	5.82091	101.319
-Spot 210	198.005	575026	1.90737	17.0892	0.785017	0.736218	1.46392	0.0912884	1.23564	0.844063	563.152	6.66325	560.196	6.30311	548.227	17.1456	563.152	6.66325	102.723
-Spot 32	133.133	184928	1.81243	17.1341	0.712225	0.734463	1.34167	0.0913098	1.13703	0.847467	563.279	6.13279	559.169	5.76881	542.497	15.5506	563.279	6.13279	103.831
-Spot 121	167.937	98536.2	3.75879	16.9142	0.750685	0.744514	1.22973	0.0913717	0.974013	0.792056	563.644	5.2568	565.036	5.32894	570.647	16.3385	563.644	5.2568	98.7728
-Spot 42	117.363	140509	3.19724	16.9532	0.900171	0.743031	1.49923	0.0914001	1.19891	0.799683	563.812	6.47242	564.173	6.48941	565.648	19.6233	563.812	6.47242	99.6755
-Spot 3	82.4571	41786	1.64008	17.1518	1.26501	0.7346	1.77126	0.0914215	1.2398	0.699953	563.939	6.69462	559.249	7.6168	540.199	27.6721	563.939	6.69462	104.395
-Spot 104	120.433	271730	1.12259	16.9897	0.749084	0.742407	1.33446	0.0915197	1.10438	0.827586	564.518	5.96924	563.809	5.7734	560.925	16.3202	564.518	5.96924	100.641
-Spot 227	154.04	110270	1.62261	16.9544	1.28355	0.744043	2.07682	0.0915307	1.6327	0.786152	564.584	8.82582	564.762	8.99666	565.501	27.9414	564.584	8.82582	99.8377
-Spot 168	97.256	57603.1	0.981898	17.1217	0.75459	0.736877	1.12411	0.0915442	0.833204	0.741209	564.663	4.50463	560.582	4.8425	544.051	16.4835	564.663	4.50463	103.789
-Spot 96	88.7353	302768	3.12252	17.0263	0.777134	0.74133	1.17044	0.0915842	0.875216	0.747764	564.9	4.73366	563.182	5.05958	556.229	16.9485	564.9	4.73366	101.559
-Spot 5	64.4688	93859.6	1.54842	16.866	1.12616	0.749583	1.78287	0.0917315	1.38217	0.775251	565.769	7.48658	567.982	7.7561	576.859	24.4642	565.769	7.48658	98.0775
-Spot 16	305.022	246954	3.42124	16.9647	0.816546	0.745972	1.50486	0.0918239	1.26407	0.839988	566.315	6.85317	565.884	6.52857	564.134	17.7988	566.315	6.85317	100.387
-Spot 27	129.053	40304.7	7.796	17.0099	0.841992	0.744042	1.54478	0.0918303	1.29514	0.838399	566.353	7.02208	564.761	6.69179	558.378	18.3683	566.353	7.02208	101.428
-Spot 99	268.314	218960	0.662676	16.8241	0.750429	0.752338	1.56851	0.0918401	1.37734	0.878123	566.41	7.4685	569.58	6.83782	582.232	16.2909	566.41	7.4685	97.2827
-Spot 170	96.8964	91141.3	1.23479	16.8288	1.51625	0.752863	1.79955	0.0919297	0.969204	0.538581	566.939	5.26011	569.884	7.84821	581.639	32.9141	566.939	5.26011	97.4728
-Spot 73	144.287	25801.8	2.65156	17.0342	0.728804	0.745809	1.53237	0.09218	1.34796	0.879658	568.417	7.33393	565.79	6.64706	555.263	15.8863	568.417	7.33393	102.369
-Spot 131	73.0384	31208.7	1.07936	16.9881	1.06175	0.748205	1.54494	0.0922259	1.12228	0.726426	568.688	6.10886	567.182	6.7139	561.127	23.1402	568.688	6.10886	101.347
-Spot 242	116.496	64368.1	1.31265	16.9522	0.699549	0.750746	1.10471	0.0923434	0.854997	0.773955	569.382	4.6594	568.657	4.81008	565.783	15.2212	569.382	4.6594	100.636
-Spot 72	96.8531	298073	1.23932	16.9812	0.793894	0.750542	1.31813	0.0924763	1.05223	0.798277	570.166	5.74179	568.539	5.73844	562.017	17.2987	570.166	5.74179	101.45
-Spot 183	163.201	111887	1.40587	16.5655	0.948955	0.769689	1.22922	0.092514	0.78132	0.635624	570.388	4.26509	579.584	5.42852	615.776	20.4935	570.388	4.26509	92.6292
-Spot 58	101.758	807006	2.51217	16.8239	0.845527	0.758512	1.31515	0.0925927	1.00733	0.765941	570.853	5.50312	573.151	5.76008	582.258	18.3606	570.853	5.50312	98.0411
-Spot 86	323.346	553063	2.46265	16.8743	0.70447	0.757018	1.63921	0.092687	1.48011	0.902942	571.409	8.09347	572.288	7.17135	575.762	15.3333	571.409	8.09347	99.2439
-Spot 313	147.249	45631.4	7.88583	16.5741	0.687755	0.771085	1.03836	0.0927298	0.777933	0.749195	571.661	4.25566	580.385	4.59032	614.655	14.8747	571.661	4.25566	93.0052
-Spot 116	193.227	124950	9.45611	17.0936	0.689626	0.749612	1.31557	0.0929731	1.12033	0.851594	573.096	6.14346	567.999	5.72326	547.665	15.0465	573.096	6.14346	104.644
-Spot 173	295.41	463722	7.68123	16.62	0.707051	0.773572	1.28676	0.0932868	1.07509	0.835505	574.946	5.91358	581.81	5.6988	608.675	15.2799	574.946	5.91358	94.4587
-Spot 24	139.184	584203	3.41021	16.8456	0.70731	0.764203	1.50689	0.0934077	1.33058	0.882994	575.66	7.32755	576.432	6.62793	579.501	15.3779	575.66	7.32755	99.3372
-Spot 52	37.6289	20459.6	1.33827	16.912	1.12413	0.764655	1.67158	0.0938315	1.23714	0.740103	578.157	6.84127	576.692	7.35481	570.939	24.4721	578.157	6.84127	101.264
-Spot 132	138.271	90323.4	1.79208	16.795	0.896832	0.773349	1.31968	0.0942419	0.968115	0.733598	580.576	5.37497	581.682	5.84365	586.002	19.4425	580.576	5.37497	99.074
-Spot 56	244.082	970087	5.97103	15.7464	1.24999	0.832357	1.70244	0.0950995	1.15579	0.678899	585.626	6.47024	614.919	7.85254	724.299	26.4933	585.626	6.47024	80.8542
-Spot 17	211.171	126025	2.31609	16.8811	0.712644	0.779005	1.29334	0.0954179	1.07929	0.834498	587.5	6.06046	584.916	5.75055	574.885	15.4958	587.5	6.06046	102.194
-Spot 208	107.088	112252	2.0914	16.8804	0.731127	0.781094	1.189	0.0956698	0.937647	0.788599	588.982	5.2778	586.107	5.2946	574.983	15.8949	588.982	5.2778	102.435
-Spot 271	143.753	58066.6	2.65545	16.9447	0.656617	0.778216	1.88927	0.0956803	1.7715	0.937661	589.044	9.97236	584.465	8.39556	566.737	14.287	589.044	9.97236	103.936
-Spot 89	209.443	105733	2.10516	16.5332	0.773434	0.803778	1.20576	0.0964232	0.925019	0.767166	593.413	5.24412	598.958	5.45568	619.985	16.7102	593.413	5.24412	95.7141
-Spot 296	136.401	71971.7	2.64829	16.4899	0.686282	0.808259	1.20926	0.0967067	0.995654	0.823358	595.08	5.65969	601.477	5.48838	625.641	14.8157	595.08	5.65969	95.1152
-Spot 95	83.9114	427328	1.05475	16.7874	0.834643	0.796055	1.14036	0.0969648	0.777035	0.681396	596.597	4.42772	594.601	5.13213	586.991	18.09	596.597	4.42772	101.636
-Spot 244	74.3613	71500.6	2.12684	16.8851	0.857111	0.798984	1.29657	0.097888	0.972853	0.750331	602.02	5.59161	596.255	5.84709	574.387	18.6465	602.02	5.59161	104.811
-Spot 190	201.702	54187.9	1.05367	16.1703	0.794296	0.835375	1.67205	0.098014	1.47134	0.879962	602.76	8.46665	616.59	7.72758	667.699	17.0054	602.76	8.46665	90.2741
-Spot 39	120.247	40480.1	3.04783	16.7498	0.775374	0.807714	1.07588	0.0981644	0.745859	0.693257	603.643	4.29795	601.171	4.88117	591.84	16.8054	603.643	4.29795	101.994
-Spot 282	189.232	91960.2	0.467836	16.162	1.1659	0.837632	1.82101	0.0982279	1.39884	0.768169	604.016	8.06547	617.838	8.42843	668.836	24.9395	604.016	8.06547	90.3084
-Spot 171	51.1447	18366.4	2.0237	16.5971	1.16158	0.816058	1.51642	0.0982746	0.974816	0.642841	604.289	5.62304	605.847	6.91906	611.657	25.1031	604.289	5.62304	98.7955
-Spot 9	58.4819	67099.9	1.21663	16.3274	0.954529	0.837321	1.54542	0.0991969	1.2154	0.786452	609.701	7.07064	617.666	7.15138	646.99	20.5268	609.701	7.07064	94.2365
-Spot 144	43.7134	144445	1.78727	16.4849	1.07409	0.830847	1.4884	0.0993792	1.03037	0.692266	610.77	6.00425	614.082	6.85843	626.297	23.1536	610.77	6.00425	97.5208
-Spot 215	93.1305	263684	1.58957	16.4922	0.830356	0.841736	1.36527	0.100726	1.08373	0.793784	618.661	6.39295	620.103	6.33581	625.349	17.9228	618.661	6.39295	98.9306
-Spot 299	127.651	106605	2.02295	16.2969	0.905671	0.854006	1.36719	0.100985	1.02419	0.749121	620.176	6.0558	626.846	6.3946	651.008	19.4223	620.176	6.0558	95.264
-Spot 44	126.271	27039.6	1.13745	16.1948	1.16953	0.862732	1.53467	0.101377	0.993691	0.647493	622.471	5.89619	631.613	7.21737	664.494	25.0369	622.471	5.89619	93.676
-Spot 261	46.1992	59279.9	1.37271	16.5566	1.20727	0.845106	1.58571	0.101524	1.0281	0.648353	623.335	6.10843	621.959	7.37483	616.936	26.0733	623.335	6.10843	101.037
-Spot 230	222.349	247870	6.66583	16.6632	0.603423	0.842764	1.21828	0.101895	1.05835	0.868719	625.505	6.30897	620.67	5.65743	603.059	13.0387	625.505	6.30897	103.722
-Spot 248	230.684	105293	1.54731	16.2982	0.716035	0.876912	1.2997	0.103701	1.08467	0.834555	636.061	6.56971	639.314	6.1658	650.845	15.3629	636.061	6.56971	97.7284
-Spot 297	160.218	92697.1	3.59813	14.5713	1.61071	1.21085	1.9226	0.12802	1.04977	0.546013	776.559	7.68018	805.582	10.6922	886.683	33.2992	776.559	7.68018	87.5802
-Spot 291	203.435	112159	3.71288	15.4464	0.668611	1.18018	1.33731	0.132271	1.15817	0.866044	800.809	8.72176	791.399	7.35064	764.959	14.089	800.809	8.72176	104.687
-Spot 40	39.1582	47921.1	1.97605	8.82968	1.45801	5.00076	4.14323	0.320382	3.87821	0.936036	1791.6	60.6641	1819.45	35.0729	1851.48	26.3622	1851.48	26.3622	96.7657
-Spot 275	169.082	756773	2.10183	7.99839	0.65433	6.3595	1.12978	0.369074	0.92101	0.81521	2025.04	16.0055	2026.7	9.91318	2028.37	11.5847	2028.37	11.5847	99.836
-Spot 124	15.635	14159.9	1.15019	7.638	0.934826	6.78084	1.42321	0.375795	1.07314	0.754026	2056.61	18.896	2083.23	12.5944	2109.62	16.3999	2109.62	16.3999	97.487
-Spot 176	109.704	148938	1.42641	4.82889	0.647385	14.7834	1.21253	0.517976	1.02524	0.845539	2690.59	22.5523	2801.4	11.5323	2882.17	10.5113	2882.17	10.5113	93.3531

## Sheet: JT Stalvey Jr #1
Table _____. U-Pb geochronologic analyses.
							Isotope ratios						Apparent ages (Ma)
Analysis	U	206Pb	U/Th	206Pb*	±	207Pb*	±	206Pb*	±	error	206Pb*	±	207Pb*	±	206Pb*	±	Best age	±	Conc
	(ppm)	204Pb		207Pb*	(%)	235U*	(%)	238U	(%)	corr.	238U*	(Ma)	235U	(Ma)	207Pb*	(Ma)	(Ma)	(Ma)	(%)
GBDS-22-Spot 254	104.376	1379.64	10.7871	7.92196	2.54579	0.536087	3.00388	0.0308145	1.59445	0.530796	195.644	3.07258	435.841	10.6451	2045.35	44.9961	195.644	3.07258	NA
GBDS-22-Spot 310	62.15	10460	1.69501	11.2732	5.5046	0.464426	5.95475	0.0379883	2.27123	0.381414	240.352	5.35842	387.332	19.1776	1396.97	105.619	240.352	5.35842	NA
GBDS-22-Spot 25	1524.32	150526	3.60884	19.4224	0.763899	0.296358	1.28053	0.0417645	1.02772	0.802575	263.761	2.65601	263.552	2.97243	261.67	17.5556	263.761	2.65601	NA
GBDS-22-Spot 308	435.407	52127.8	2.33565	18.3729	1.46442	0.316044	1.71728	0.0421321	0.896952	0.522311	266.035	2.33764	278.855	4.18745	387.799	32.8619	266.035	2.33764	NA
GBDS-22-Spot 170	1477.59	193150	3.52496	19.1444	0.711588	0.306717	1.28329	0.0426058	1.06793	0.832182	268.965	2.81326	271.633	3.05853	294.716	16.2363	268.965	2.81326	NA
GBDS-22-Spot 271	1173.84	566900	2.95793	19.4617	0.777148	0.302681	1.29135	0.0427418	1.03132	0.798637	269.806	2.72512	268.492	3.04663	257.047	17.861	269.806	2.72512	NA
GBDS-22-Spot 216	221.092	2249.84	1.30045	10.78	11.0782	0.558698	11.3547	0.0437001	2.49059	0.219343	275.727	6.72244	450.679	41.3488	1482.25	210.604	275.727	6.72244	NA
GBDS-22-Spot 69	66.2688	411.893	3.91631	3.01599	1.37637	2.06016	1.67888	0.0450835	0.961375	0.57263	284.266	2.67349	1135.67	11.4769	3623.67	21.0938	284.266	2.67349	NA
GBDS-22-Spot 200	254.489	78792.9	1.03465	19.1063	0.808963	0.326075	1.4813	0.0452045	1.2409	0.83771	285.013	3.45968	286.565	3.6985	299.221	18.4302	285.013	3.45968	NA
GBDS-22-Spot 85	89.9622	22553.6	0.787085	19.465	0.907024	0.323715	1.50491	0.0457199	1.20086	0.797961	288.19	3.38455	284.756	3.7369	256.651	20.8495	288.19	3.38455	NA
GBDS-22-Spot 229	551.623	110712	2.79108	19.1144	0.760474	0.335475	1.17413	0.0465274	0.894574	0.761903	293.166	2.56385	293.737	2.99483	298.254	17.3273	293.166	2.56385	NA
GBDS-22-Spot 166	285.198	12498.6	1.82302	18.0038	1.11026	0.380511	1.53734	0.0497072	1.06336	0.69169	312.724	3.24601	327.414	4.30258	433.187	24.7441	312.724	3.24601	NA
GBDS-22-Spot 135	275.208	51559.5	1.99662	18.6275	1.18818	0.368394	1.70675	0.0497915	1.22525	0.717884	313.241	3.74624	318.463	4.66558	356.816	26.8265	313.241	3.74624	NA
GBDS-22-Spot 197	211.169	52086.9	1.84283	18.7445	0.819883	0.372914	1.42189	0.0507189	1.1617	0.817015	318.934	3.6149	321.811	3.92159	342.686	18.5442	318.934	3.6149	NA
GBDS-22-Spot 49	129.702	16339.2	1.41682	19.5174	0.885435	0.359709	1.32	0.0509403	0.978984	0.741654	320.292	3.05898	311.998	3.54578	250.454	20.3744	320.292	3.05898	NA
GBDS-22-Spot 89	167.464	62923.9	2.5691	18.0984	1.73307	0.407771	2.04603	0.0535483	1.08753	0.53153	336.269	3.56327	347.269	6.01771	421.496	38.6876	336.269	3.56327	NA
GBDS-22-Spot 17	224.855	61769	2.52178	18.7757	0.739971	0.440266	1.38547	0.0599789	1.17132	0.845426	375.497	4.27261	370.44	4.30035	338.943	16.7454	375.497	4.27261	NA
GBDS-22-Spot 263	623.824	194619	2.73852	18.3682	0.918245	0.450391	1.43388	0.0600266	1.10129	0.768049	375.787	4.0202	377.553	4.52117	388.378	20.6171	375.787	4.0202	NA
GBDS-22-Spot 267	302.813	53963.8	1.76524	17.914	0.847102	0.469904	1.3375	0.0610786	1.03505	0.773868	382.182	3.84079	391.123	4.34157	444.322	18.8553	382.182	3.84079	NA
GBDS-22-Spot 57	246.98	128325	2.34261	18.2012	0.981377	0.500605	1.32239	0.0661126	0.886347	0.670262	412.693	3.54326	412.112	4.47941	408.839	21.955	412.693	3.54326	100.943
GBDS-22-Spot 52	284.998	61518.8	3.15446	18.0594	0.664361	0.508867	1.25371	0.06668	1.06321	0.84805	416.122	4.28448	417.687	4.29322	426.316	14.8172	416.122	4.28448	97.6089
GBDS-22-Spot 13	96.848	27754.8	0.868349	18.1126	0.878559	0.525326	1.66649	0.0690392	1.41609	0.849746	430.365	5.89538	428.703	5.82777	419.757	19.6171	430.365	5.89538	102.527
GBDS-22-Spot 247	647.316	97671.2	27.3306	17.0635	0.804085	0.668283	1.31169	0.0827403	1.03633	0.790072	512.459	5.10517	519.668	5.33527	551.505	17.5732	512.459	5.10517	92.9201
GBDS-22-Spot 225	264.54	52173.7	1.86588	17.2787	0.692409	0.675228	1.59571	0.0846542	1.43766	0.900952	523.844	7.23321	523.886	6.53079	524.05	15.1922	523.844	7.23321	99.9606
GBDS-22-Spot 284	43.3652	116537	1.34055	16.5063	1.19009	0.712105	2.00117	0.0852868	1.60884	0.80395	527.602	8.15023	545.996	8.4516	623.498	25.6552	527.602	8.15023	84.6197
GBDS-22-Spot 202	19.7626	8872.29	282587	17.1231	2.27581	0.688543	3.11979	0.0855461	2.13396	0.684008	529.142	10.8407	531.925	12.9181	543.858	49.7441	529.142	10.8407	97.2941
GBDS-22-Spot 80	427.864	72759.1	4.95754	17.0104	0.854558	0.694118	1.49698	0.0856713	1.2291	0.821051	529.886	6.25232	535.272	6.22789	558.31	18.628	529.886	6.25232	94.9089
GBDS-22-Spot 203	122.659	32663	1.04697	17.1278	0.616823	0.694167	1.52633	0.0862685	1.39614	0.914705	533.431	7.14762	535.301	6.35024	543.289	13.4626	533.431	7.14762	98.1854
GBDS-22-Spot 28	359.011	77451.5	101.539	17.2105	0.741509	0.69902	1.47595	0.0872911	1.27617	0.864639	539.497	6.60466	538.205	6.16594	532.731	16.2448	539.497	6.60466	101.27
GBDS-22-Spot 46	215.162	59607.7	1.4141	17.0394	0.477012	0.711276	1.20922	0.0879385	1.11116	0.918905	543.334	5.78987	545.504	5.10337	554.558	10.3859	543.334	5.78987	97.9761
GBDS-22-Spot 172	90.8799	30935.2	1.20796	17.0694	1.0481	0.713139	1.67345	0.0883243	1.30457	0.779571	545.619	6.82507	546.609	7.07343	550.758	22.8777	545.619	6.82507	99.0669
GBDS-22-Spot 232	270.564	439559	12.1191	16.8779	0.520163	0.724628	1.00024	0.0887402	0.854344	0.854142	548.082	4.48898	553.395	4.26732	575.297	11.3186	548.082	4.48898	95.2695
GBDS-22-Spot 113	109.139	119627	1.12514	17.0618	0.890497	0.71706	1.51806	0.0887705	1.22944	0.809877	548.261	6.46189	548.93	6.43718	551.718	19.4233	548.261	6.46189	99.3735
GBDS-22-Spot 171	150.766	77976.8	1.1074	16.1671	1.16578	0.757383	1.70108	0.0888453	1.23881	0.728245	548.704	6.51613	572.499	7.44411	668.13	24.9568	548.704	6.51613	82.1254
GBDS-22-Spot 228	224.737	127810	2.87489	17.0129	0.718869	0.720911	1.16355	0.0889914	0.914917	0.786316	549.57	4.81974	551.204	4.94927	557.954	15.6948	549.57	4.81974	98.4973
GBDS-22-Spot 257	93.0157	26841.9	1.78219	17.0839	1.066	0.72037	1.43224	0.0892957	0.956534	0.667857	551.371	5.05479	550.885	6.08956	548.894	23.2596	551.371	5.05479	100.451
GBDS-22-Spot 111	76.1212	35822.5	1.78542	16.9526	0.850964	0.726902	1.20396	0.0894127	0.851695	0.70741	552.063	4.50618	554.733	5.14582	565.731	18.531	552.063	4.50618	97.5841
GBDS-22-Spot 286	72.0396	45083.2	0.548117	16.4559	1.30279	0.749686	1.67533	0.0895135	1.05332	0.628722	552.659	5.57871	568.042	7.28883	630.133	28.0799	552.659	5.57871	87.7051
GBDS-22-Spot 231	164.115	60629.6	1.23852	16.8316	1.06194	0.734605	1.53003	0.0897155	1.10149	0.719914	553.854	5.84594	559.252	6.57946	581.281	23.0449	553.854	5.84594	95.2817
GBDS-22-Spot 222	75.6578	20330.5	1.08	16.0726	1.14175	0.769586	1.5254	0.089749	1.01156	0.663145	554.053	5.3705	579.525	6.73607	680.655	24.4115	554.053	5.3705	81.3999
GBDS-22-Spot 312	158.844	77251.5	2.31645	16.9172	0.821539	0.731566	1.34623	0.0897985	1.06649	0.792206	554.345	5.66496	557.472	5.7752	570.237	17.8625	554.345	5.66496	97.2131
GBDS-22-Spot 221	72.2452	25223.9	1.33677	17.0265	1.03163	0.729619	1.3609	0.0901383	0.887575	0.652197	556.355	4.73098	556.33	5.82917	556.215	22.4914	556.355	4.73098	100.025
GBDS-22-Spot 50	176.364	180770	2.17782	17.1092	0.816714	0.726126	1.31832	0.0901423	1.03486	0.784987	556.379	5.51628	554.277	5.63111	545.63	17.8245	556.379	5.51628	101.97
GBDS-22-Spot 249	122.157	96821	1.48315	16.9371	0.912863	0.733689	1.46851	0.0901654	1.1503	0.783313	556.515	6.13306	558.716	6.31033	567.713	19.8538	556.515	6.13306	98.0276
GBDS-22-Spot 246	234.658	65415.4	3.47399	16.7078	0.820162	0.744027	1.39203	0.0901976	1.12476	0.808	556.705	5.99886	564.753	6.03004	597.308	17.7447	556.705	5.99886	93.2024
GBDS-22-Spot 256	198.131	89322.8	2.55313	17.0067	0.642236	0.732078	1.18607	0.0903366	0.99714	0.840711	557.528	5.32571	557.772	5.09018	558.788	13.9823	557.528	5.32571	99.7744
GBDS-22-Spot 151	106.866	68694.3	1.92423	16.6375	1.35476	0.752572	1.84217	0.0908497	1.24829	0.677618	560.56	6.70181	569.715	8.03232	606.402	29.3102	560.56	6.70181	92.4403
GBDS-22-Spot 65	33.4629	13085.1	1.02962	16.2939	1.32748	0.769414	1.90123	0.0909645	1.36105	0.715881	561.239	7.31567	579.427	8.39467	651.375	28.4968	561.239	7.31567	86.1621
GBDS-22-Spot 100	101.395	8.52567e+06	2.70285	16.874	0.836618	0.74655	1.28408	0.0914039	0.974132	0.758622	563.835	5.25915	566.22	5.57319	575.795	18.1839	563.835	5.25915	97.9228
GBDS-22-Spot 41	702.454	70053.3	0.588195	16.392	0.778251	0.769534	1.49634	0.0915269	1.27803	0.854104	564.561	6.90836	579.496	6.60748	638.502	16.7473	564.561	6.90836	88.4197
GBDS-22-Spot 59	79.6603	25254.6	1.2663	17.1558	0.811744	0.736348	1.57545	0.0916606	1.35022	0.857042	565.351	7.30836	560.272	6.78401	539.7	17.7644	565.351	7.30836	104.753
GBDS-22-Spot 165	279.013	164521	1.19733	16.8551	0.679521	0.752349	1.25071	0.0920109	1.05001	0.839534	567.419	5.7033	569.586	5.45243	578.246	14.7869	567.419	5.7033	98.1277
GBDS-22-Spot 98	1319.39	44284.5	4.07981	15.842	0.986582	0.807053	1.44142	0.0927681	1.05088	0.729059	571.887	5.75099	600.8	6.53669	711.45	20.9746	571.887	5.75099	80.3833
GBDS-22-Spot 193	361.816	112105	2.11382	16.778	0.800376	0.762607	1.32327	0.0928386	1.05378	0.796343	572.303	5.77087	575.513	5.8134	588.188	17.3429	572.303	5.77087	97.2994
GBDS-22-Spot 1	49.7064	79819.5	7.82971	16.8076	0.947774	0.761758	1.34097	0.092899	0.94864	0.70743	572.66	5.19817	575.024	5.8874	584.399	20.5749	572.66	5.19817	97.9911
GBDS-22-Spot 29	571.543	605281	2.21482	16.6923	0.725197	0.767949	1.28279	0.0930115	1.05812	0.824865	573.323	5.80453	578.585	5.65784	599.283	15.7033	573.323	5.80453	95.6681
GBDS-22-Spot 90	189.102	115664	2.13279	16.8901	0.719019	0.758956	1.37756	0.0930117	1.17502	0.852974	573.324	6.44579	573.407	6.0354	573.735	15.6371	573.324	6.44579	99.9283
GBDS-22-Spot 76	285.932	130189	8.11579	16.6999	0.962613	0.768675	1.75256	0.0931418	1.46452	0.83565	574.091	8.04421	579.002	7.73402	598.298	20.8412	574.091	8.04421	95.954
GBDS-22-Spot 58	226.279	60753	9.47511	16.9899	0.804892	0.755734	1.41431	0.0931636	1.16294	0.822264	574.22	6.38904	571.546	6.18145	560.905	17.5386	574.22	6.38904	102.374
GBDS-22-Spot 7	332.627	78493.2	4.68987	16.7852	0.833046	0.768245	1.51021	0.0935653	1.25967	0.834103	576.588	6.94777	578.756	6.6624	587.284	18.0542	576.588	6.94777	98.1787
GBDS-22-Spot 4	51.3396	21453.8	2.8275	16.8121	0.888187	0.775707	1.55863	0.0946255	1.2808	0.821748	582.835	7.13745	583.032	6.91363	583.775	19.2829	582.835	7.13745	99.839
GBDS-22-Spot 117	246.314	102581	2.24218	16.6137	0.80067	0.785587	1.39916	0.0946997	1.14742	0.820079	583.272	6.39876	588.665	6.25052	609.494	17.3078	583.272	6.39876	95.6977
GBDS-22-Spot 148	267.424	38188	1.72303	16.1818	0.835592	0.807869	1.25994	0.0948539	0.942999	0.748445	584.18	5.26657	601.258	5.71689	666.189	17.9001	584.18	5.26657	87.6898
GBDS-22-Spot 238	246.516	72378.3	2.69415	16.7996	0.637281	0.778861	0.958091	0.0949393	0.71541	0.746704	584.683	3.9988	584.834	4.25949	585.439	13.8314	584.683	3.9988	99.8708
GBDS-22-Spot 73	1360	466692	2.01316	16.9954	0.625137	0.771524	1.07455	0.0951411	0.873997	0.813358	585.871	4.8947	580.637	4.75186	560.204	13.626	585.871	4.8947	104.582
GBDS-22-Spot 147	85.3338	66230.6	3.53888	16.8361	1.04279	0.779182	1.49743	0.0951848	1.07466	0.71767	586.128	6.02104	585.017	6.6589	580.708	22.6507	586.128	6.02104	100.933
GBDS-22-Spot 169	113.318	37954.6	1.3953	16.9675	0.738585	0.777051	1.21817	0.0956652	0.968723	0.79523	588.955	5.45248	583.8	5.40867	563.778	16.0817	588.955	5.45248	104.466
GBDS-22-Spot 149	75.3586	65133.3	1.87767	16.4206	0.984871	0.80489	1.45893	0.0958987	1.07634	0.737759	590.329	6.0717	599.583	6.60627	634.759	21.2139	590.329	6.0717	93.0005
GBDS-22-Spot 74	135.43	73043.3	1.99901	16.2931	1.36706	0.811475	1.67592	0.0959325	0.969472	0.578471	590.528	5.47061	603.281	7.62316	651.508	29.3459	590.528	5.47061	90.6401
GBDS-22-Spot 118	135.061	46422.7	0.790504	16.9299	0.945054	0.782172	1.71811	0.0960825	1.43485	0.835129	591.41	8.10821	586.722	7.65671	568.646	20.5618	591.41	8.10821	104.003
GBDS-22-Spot 15	318.376	121838	5.93517	16.7831	0.904941	0.791094	1.80242	0.0963357	1.55878	0.864826	592.899	8.82971	591.792	8.08359	587.554	19.6129	592.899	8.82971	100.91
GBDS-22-Spot 32	265.528	320975	3.26557	16.7054	1.04311	0.796529	1.72804	0.0965488	1.3777	0.79726	594.152	7.81972	594.869	7.77965	597.604	22.5872	594.152	7.81972	99.4224
GBDS-22-Spot 115	352.831	72559.9	2.96835	16.3834	0.670624	0.815494	1.24498	0.096942	1.04892	0.842521	596.463	5.9757	605.531	5.67834	639.639	14.4238	596.463	5.9757	93.2499
GBDS-22-Spot 311	749.027	105214	9.18227	16.5028	0.716904	0.817008	1.32917	0.0978296	1.11925	0.842073	601.677	6.42958	606.378	6.06853	623.962	15.4804	601.677	6.42958	96.4285
GBDS-22-Spot 180	253.217	61915.1	1.31531	16.5929	0.791892	0.816134	1.1775	0.0982589	0.871444	0.740079	604.197	5.02603	605.889	5.3729	612.202	17.1109	604.197	5.02603	98.6925
GBDS-22-Spot 226	186.518	24658.4	1.02899	15.6101	1.14759	0.869578	1.6031	0.0984919	1.11936	0.698248	605.565	6.46982	635.338	7.57117	742.714	24.2691	605.565	6.46982	81.5341
GBDS-22-Spot 141	146.16	59493.5	0.905396	16.671	0.830056	0.814736	1.53341	0.0985523	1.28932	0.84082	605.919	7.45634	605.108	6.99034	602.047	17.9449	605.919	7.45634	100.643
GBDS-22-Spot 26	246.108	174604	3.96563	16.58	0.81557	0.819828	1.44717	0.0986271	1.19547	0.826074	606.358	6.91836	607.952	6.61985	613.877	17.6168	606.358	6.91836	98.7751
GBDS-22-Spot 262	423.877	2.51031e+06	2.15588	16.3747	0.833261	0.830112	1.26365	0.0986274	0.949998	0.751787	606.36	5.49779	613.674	5.81998	640.777	17.9339	606.36	5.49779	94.6288
GBDS-22-Spot 306	96.9049	32301.2	2.201	16.6772	1.02853	0.816472	1.76441	0.0987988	1.43362	0.812523	607.366	8.30972	606.078	8.05287	601.246	22.2645	607.366	8.30972	101.018
GBDS-22-Spot 37	141.518	78528.9	0.907188	16.6624	0.724988	0.818544	1.34837	0.0989616	1.13688	0.84315	608.32	6.59957	607.236	6.16257	603.17	15.6746	608.32	6.59957	100.854
GBDS-22-Spot 116	377.701	118196	3.63744	16.532	0.693236	0.825443	1.13318	0.0990149	0.896395	0.791043	608.633	5.20613	611.08	5.20298	620.142	14.9796	608.633	5.20613	98.1442
GBDS-22-Spot 272	345.549	179020	3.44379	16.3869	0.680707	0.834658	1.38399	0.0992417	1.20501	0.870683	609.964	7.01312	616.193	6.39324	639.171	14.6415	609.964	7.01312	95.4304
GBDS-22-Spot 105	630.137	94505	2.69496	16.3876	0.528527	0.834965	1.10538	0.0992822	0.970833	0.878283	610.201	5.6523	616.363	5.10722	639.085	11.3686	610.201	5.6523	95.4803
GBDS-22-Spot 212	72.2319	50487.9	5.16475	16.5475	0.993284	0.827779	1.42105	0.099388	1.01625	0.715142	610.822	5.92247	612.379	6.53485	618.122	21.4529	610.822	5.92247	98.8189
GBDS-22-Spot 67	469.43	1.12209e+06	2.8628	16.436	0.829852	0.833407	1.3088	0.0993896	1.01207	0.773286	610.831	5.8982	615.501	6.04095	632.741	17.8695	610.831	5.8982	96.5373
GBDS-22-Spot 208	264.147	138858	3.05478	16.5788	0.680682	0.831422	1.23499	0.100015	1.03047	0.834396	614.494	6.03973	614.401	5.69285	614.036	14.7031	614.494	6.03973	100.075
GBDS-22-Spot 119	55.3611	36451.2	4.15346	16.4919	0.952554	0.836308	1.44206	0.100075	1.08267	0.750781	614.846	6.34916	617.106	6.66868	625.386	20.5563	614.846	6.34916	98.3145
GBDS-22-Spot 252	144.174	19131.5	2.55718	16.3151	0.874767	0.84738	1.41334	0.100312	1.1101	0.785441	616.24	6.52406	623.21	6.58271	648.592	18.7865	616.24	6.52406	95.0119
GBDS-22-Spot 136	485.094	57234.5	0.568476	15.6688	1.07018	0.88314	1.50698	0.100404	1.06099	0.70405	616.778	6.24065	642.677	7.17615	734.809	22.6406	616.778	6.24065	83.9372
GBDS-22-Spot 233	121.761	54283.3	0.815085	16.0285	1.26512	0.863398	1.81691	0.100414	1.30409	0.717749	616.833	7.67117	631.976	8.5483	686.528	27.0024	616.833	7.67117	89.8481
GBDS-22-Spot 109	76.2884	30361.8	2.23552	16.7242	0.622309	0.827831	1.0424	0.100456	0.836254	0.802242	617.079	4.92106	612.408	4.79371	595.189	13.4758	617.079	4.92106	103.678
GBDS-22-Spot 283	471.773	140960	1.63561	16.1651	0.707477	0.857246	1.3062	0.100548	1.09801	0.840617	617.617	6.46678	628.618	6.12181	668.402	15.1551	617.617	6.46678	92.402
GBDS-22-Spot 242	357.289	81940.7	2.49042	16.4673	0.636012	0.843453	1.12535	0.100779	0.928392	0.824977	618.975	5.47925	621.049	5.2282	628.596	13.725	618.975	5.47925	98.4695
GBDS-22-Spot 56	1352.14	149229	0.916377	16.5217	0.585013	0.840855	1.01754	0.1008	0.832549	0.818202	619.098	4.91453	619.617	4.71937	621.494	12.6412	619.098	4.91453	99.6145
GBDS-22-Spot 142	168.076	228391	2.49575	16.3971	0.82192	0.847702	1.54325	0.100855	1.30617	0.846373	619.418	7.71409	623.387	7.18928	637.842	17.6881	619.418	7.71409	97.1114
GBDS-22-Spot 71	134.351	68922.4	2.56227	16.3688	0.712742	0.849486	1.41405	0.100893	1.22129	0.863679	619.641	7.21527	624.367	6.59487	641.55	15.3283	619.641	7.21527	96.585
GBDS-22-Spot 126	89.8682	74558.3	1.24366	16.5987	1.23601	0.837948	1.80762	0.10092	1.319	0.72969	619.801	7.79446	618.012	8.36815	611.446	26.7097	619.801	7.79446	101.366
GBDS-22-Spot 10	143.032	61938.6	2.05962	16.718	0.828315	0.831996	1.2852	0.100924	0.982668	0.764603	619.821	5.80714	614.719	5.92656	595.951	17.946	619.821	5.80714	104.005
GBDS-22-Spot 81	38.2801	43074.4	1.95915	16.2323	1.21919	0.857657	1.64125	0.101014	1.09877	0.669471	620.35	6.49854	628.843	7.69417	659.527	26.1374	620.35	6.49854	94.0599
GBDS-22-Spot 300	50.9284	77695	2.15972	16.4153	0.927974	0.848857	1.40071	0.101105	1.04922	0.74906	620.878	6.21048	624.022	6.53004	635.455	19.9813	620.878	6.21048	97.7061
GBDS-22-Spot 179	144.746	39091.1	0.649929	16.3434	0.883225	0.853536	1.32577	0.101217	0.988728	0.745776	621.534	5.85833	626.588	6.19904	644.894	19.0008	621.534	5.85833	96.3778
GBDS-22-Spot 219	429.785	131337	2.3456	16.0051	0.79245	0.872668	1.52375	0.101344	1.30147	0.854126	622.278	7.72018	637.015	7.21006	689.633	16.9035	622.278	7.72018	90.2332
GBDS-22-Spot 187	184.642	32637.2	1.75208	16.5055	0.85706	0.846944	1.32488	0.101431	1.01033	0.76258	622.791	5.99785	622.971	6.16899	623.603	18.504	622.791	5.99785	99.8698
GBDS-22-Spot 94	230.616	97477.1	0.55388	16.2661	0.721916	0.859837	1.34023	0.101482	1.12919	0.84253	623.087	6.70648	630.034	6.29154	655.068	15.4671	623.087	6.70648	95.118
GBDS-22-Spot 30	124.019	133990	0.691	16.5094	0.836983	0.848006	1.35823	0.101582	1.0697	0.787567	623.675	6.35889	623.554	6.32857	623.092	18.0721	623.675	6.35889	100.094
GBDS-22-Spot 207	253.128	205930	0.920228	16.0546	0.772176	0.872567	1.38077	0.101645	1.14467	0.829008	624.042	6.80836	636.96	6.53309	683.086	16.4894	624.042	6.80836	91.3562
GBDS-22-Spot 88	539.478	210929	28.4522	16.2004	0.647686	0.864882	1.31209	0.101665	1.14108	0.869671	624.157	6.78822	632.785	6.17878	663.751	13.8753	624.157	6.78822	94.0348
GBDS-22-Spot 40	166.526	88958.9	1.9184	16.519	1.23097	0.848809	1.71381	0.101738	1.19242	0.695769	624.583	7.09821	623.995	7.9895	621.842	26.5611	624.583	7.09821	100.441
GBDS-22-Spot 309	74.8195	42952.4	1.4154	16.5221	0.535228	0.848857	1.07226	0.101762	0.929122	0.86651	624.729	5.53211	624.022	4.99878	621.434	11.5672	624.729	5.53211	100.53
GBDS-22-Spot 241	313.395	92581	1.89478	16.3647	0.74722	0.860406	1.16151	0.102164	0.889248	0.765598	627.081	5.31367	630.345	5.45446	642.091	16.0858	627.081	5.31367	97.6623
GBDS-22-Spot 102	176.651	98420.7	2.08943	16.2825	1.14144	0.865059	1.66994	0.102201	1.21894	0.729929	627.294	7.28607	632.881	7.86488	652.886	24.4968	627.294	7.28607	96.0802
GBDS-22-Spot 258	580.99	75542.5	0.953043	15.9309	0.678491	0.885448	1.35182	0.102351	1.16921	0.86492	628.17	6.99815	643.921	6.44618	699.54	14.4309	628.17	6.99815	89.7977
GBDS-22-Spot 274	108.419	32119	2.59699	16.6595	0.93842	0.847033	1.45505	0.102388	1.112	0.764233	628.389	6.65789	623.019	6.77547	603.545	20.3052	628.389	6.65789	104.116
GBDS-22-Spot 265	157.76	74231.2	2.21599	16.5546	0.760047	0.854793	1.26376	0.102676	1.00966	0.798933	630.07	6.06055	627.277	5.91376	617.195	16.4298	630.07	6.06055	102.086
GBDS-22-Spot 2	175.286	59939.3	5.29402	16.5495	0.827775	0.861577	1.57336	0.103458	1.338	0.85041	634.644	8.08694	630.983	7.39398	617.867	17.8885	634.644	8.08694	102.715
GBDS-22-Spot 293	392.867	66495.8	5.19277	15.8493	0.726458	0.901393	1.3122	0.10366	1.09276	0.832769	635.822	6.61633	652.472	6.3165	710.494	15.4377	635.822	6.61633	89.4902
GBDS-22-Spot 269	277.465	453868	0.939285	16.4222	0.653101	0.870283	1.27162	0.1037	1.09109	0.85803	636.057	6.60854	635.721	6.0082	634.546	14.0736	636.057	6.60854	100.238
GBDS-22-Spot 250	155.76	72554.9	4.45633	16.4222	0.790222	0.870403	1.35828	0.103715	1.10475	0.813346	636.142	6.69218	635.786	6.41817	634.541	17.0134	636.142	6.69218	100.252
GBDS-22-Spot 217	248.058	88476.3	2.10059	16.3064	0.787397	0.878508	1.47348	0.103942	1.24546	0.845246	637.472	7.55951	640.177	6.99705	649.713	16.903	637.472	7.55951	98.1159
GBDS-22-Spot 123	82.1821	46010	2.16111	16.1847	0.96358	0.886604	1.48137	0.104117	1.12516	0.759538	638.492	6.83975	644.543	7.06888	665.782	20.6281	638.492	6.83975	95.9011
GBDS-22-Spot 224	70.7415	59352	1.2035	16.1906	1.13738	0.887243	1.51485	0.10423	1.00056	0.660504	639.15	6.08828	644.887	7.23137	665.029	24.3576	639.15	6.08828	96.1085
GBDS-22-Spot 21	229.3	25323.6	3.12384	15.304	1.00571	0.946943	1.59522	0.105152	1.23826	0.776229	644.531	7.59493	676.509	7.87824	784.442	21.1251	644.531	7.59493	82.1643
GBDS-22-Spot 236	265.749	139569	12.3783	16.2648	0.688634	0.891674	1.27844	0.105231	1.07713	0.84253	644.991	6.61112	647.268	6.11895	655.232	14.7523	644.991	6.61112	98.437
GBDS-22-Spot 268	102.636	63566.5	1.39313	16.1146	0.92841	0.906347	1.46748	0.105974	1.13646	0.774432	649.326	7.01986	655.114	7.08436	675.08	19.8673	649.326	7.01986	96.185
GBDS-22-Spot 163	84.2785	1.01339e+06	1.24146	16.1966	0.839101	0.90216	1.29896	0.106022	0.991566	0.763355	649.602	6.12733	652.881	6.25557	664.25	17.9535	649.602	6.12733	97.7948
GBDS-22-Spot 12	145.492	20172.8	2.17238	15.702	1.14788	0.937662	1.94026	0.106829	1.56428	0.806223	654.305	9.73287	671.657	9.53388	730.321	24.3195	654.305	9.73287	89.5914
GBDS-22-Spot 53	163.556	310461	0.519189	16.4858	0.827416	0.893916	1.46573	0.106929	1.20985	0.825428	654.889	7.53403	648.471	7.02469	626.173	17.856	654.889	7.53403	104.586
GBDS-22-Spot 234	492.72	577663	3.92746	15.9925	0.77	0.92254	1.11426	0.107051	0.805405	0.722815	655.598	5.02059	663.702	5.42913	691.327	16.4207	655.598	5.02059	94.8318
GBDS-22-Spot 77	109.131	32415.9	1.27114	16.4528	0.72814	0.899339	1.38695	0.107362	1.18044	0.851105	657.409	7.37772	651.374	6.66832	630.54	15.7053	657.409	7.37772	104.261
GBDS-22-Spot 205	121.436	17704.9	2.58853	15.2159	1.59433	0.982817	2.11969	0.108507	1.39685	0.658988	664.07	8.81426	695.048	10.6686	796.567	33.4454	664.07	8.81426	83.3664
GBDS-22-Spot 223	57.8034	45874.3	1.89955	16.1691	0.936238	0.944576	1.61269	0.110818	1.3131	0.814229	677.496	8.44469	675.274	7.9543	667.873	20.0484	677.496	8.44469	101.441
GBDS-22-Spot 189	45.2037	47857	1.93321	16.1421	0.924841	0.947519	1.41721	0.110978	1.07385	0.757722	678.424	6.91504	676.81	7.00129	671.462	19.7989	678.424	6.91504	101.037
GBDS-22-Spot 302	580.109	133552	2.0643	15.4975	0.607669	1.01095	1.04534	0.113678	0.850568	0.813679	694.073	5.59686	709.352	5.33602	758.001	12.8192	694.073	5.59686	91.5662
GBDS-22-Spot 129	145.423	78922.5	2.26183	15.9422	0.566624	1.00771	1.31431	0.116566	1.1859	0.902295	710.769	7.98092	707.717	6.69837	698.029	12.0519	710.769	7.98092	101.825
GBDS-22-Spot 209	351.139	71093.8	1.59388	15.7255	0.656301	1.02694	1.35295	0.117176	1.1831	0.874465	714.288	7.99942	717.398	6.96022	727.157	13.9114	714.288	7.99942	98.2303
GBDS-22-Spot 270	53.5726	72575.4	1.68505	15.8164	0.865471	1.02379	1.33693	0.117492	1.01898	0.762185	716.111	6.90635	715.817	6.86735	714.895	18.3927	716.111	6.90635	100.17
GBDS-22-Spot 160	265.116	65720.9	1.51728	15.4286	0.610796	1.10834	1.01231	0.124076	0.807281	0.797463	753.982	5.74428	757.376	5.40357	767.391	12.8659	753.982	5.74428	98.2527
GBDS-22-Spot 87	115.241	16534.7	1.81338	14.826	0.805911	1.17787	1.25113	0.126709	0.956986	0.7649	769.061	6.93775	790.319	6.87072	850.763	16.7478	769.061	6.93775	90.3967
GBDS-22-Spot 153	105.762	181607	2.22474	15.355	1.06185	1.1709	1.65428	0.130454	1.26851	0.766803	790.452	9.43657	787.065	9.06004	777.456	22.3302	790.452	9.43657	101.672
GBDS-22-Spot 156	88.413	186445	2.33314	15.105	0.721916	1.19141	1.25315	0.130578	1.02431	0.817392	791.164	7.62642	796.614	6.91793	811.911	15.1102	791.164	7.62642	97.4446
GBDS-22-Spot 239	179.662	62000.7	7.12379	15.0612	1.00219	1.20302	1.69302	0.131469	1.36453	0.805973	796.239	10.2207	801.981	9.38769	817.983	20.9388	796.239	10.2207	97.3418
GBDS-22-Spot 184	255.22	434931	2.25598	14.9566	0.80754	1.29655	1.38001	0.140706	1.11906	0.810909	848.651	8.89834	844.199	7.91103	832.49	16.8132	848.651	8.89834	101.941
GBDS-22-Spot 255	83.1948	72791	1.68621	14.5827	0.782335	1.37696	1.39277	0.145697	1.15228	0.827333	876.796	9.44622	879.143	8.19254	885.039	16.1731	876.796	9.44622	99.0686
GBDS-22-Spot 282	18.6251	7534.59	4.72528	14.3159	1.78272	1.5137	3.35474	0.157233	2.84186	0.847118	941.383	24.8912	935.935	20.5151	923.149	36.6506	923.149	36.6506	101.975
GBDS-22-Spot 303	155.734	979152	3.31335	14.0885	0.711923	1.61258	1.23224	0.164845	1.00577	0.816215	983.646	9.17542	975.113	7.72299	955.919	14.5563	955.919	14.5563	102.901
GBDS-22-Spot 78	197.085	206072	3.06323	14.0176	0.71734	1.55672	1.17912	0.158334	0.935819	0.793656	947.509	8.24612	953.166	7.28995	966.253	14.6514	966.253	14.6514	98.0602
GBDS-22-Spot 138	1221.24	92612.9	61.0353	13.9604	0.586942	1.51246	1.17731	0.153204	1.02057	0.866864	918.897	8.74027	935.435	7.19638	974.577	11.9488	974.577	11.9488	94.2868
GBDS-22-Spot 277	98.0556	243688	4.44118	13.5874	0.856473	1.70013	1.46121	0.167613	1.18388	0.810209	998.945	10.9556	1008.58	9.34226	1029.55	17.3349	1029.55	17.3349	97.027
GBDS-22-Spot 276	335.339	3.80029e+06	4.93961	13.4525	0.907189	1.73065	1.38142	0.168927	1.04179	0.754144	1006.2	9.70532	1019.99	8.89015	1049.74	18.3041	1049.74	18.3041	95.8525
GBDS-22-Spot 243	750.009	372756	17.805	12.9709	0.70828	2.08803	1.38461	0.196515	1.18974	0.859261	1156.57	12.5965	1144.88	9.5066	1122.78	14.1376	1122.78	14.1376	103.01
GBDS-22-Spot 206	169.235	561368	1.71266	12.9124	0.744634	1.95893	1.08468	0.183533	0.788696	0.727126	1086.25	7.88429	1101.52	7.29158	1131.78	14.8262	1131.78	14.8262	95.9766
GBDS-22-Spot 103	71.6423	66657	2.33405	12.4436	0.908898	2.28765	1.25517	0.20655	0.865654	0.68967	1210.41	9.55306	1208.48	8.86845	1205.06	17.8871	1205.06	17.8871	100.444
GBDS-22-Spot 295	130.839	258999	2.37029	12.3199	0.693414	2.38603	1.51176	0.21329	1.34335	0.888601	1246.32	15.2235	1238.42	10.8172	1224.68	13.6228	1224.68	13.6228	101.768
GBDS-22-Spot 296	374.993	276654	40.3215	12.2952	0.898183	2.28938	1.80051	0.204239	1.56049	0.86669	1198.05	17.0611	1209.01	12.7249	1228.66	17.6326	1228.66	17.6326	97.5089
GBDS-22-Spot 14	162.488	152305	2.88756	12.2923	0.767381	2.35949	1.32725	0.210445	1.08292	0.815913	1231.19	12.1369	1230.43	9.4654	1229.12	15.0513	1229.12	15.0513	100.168
GBDS-22-Spot 5	73.9075	118319	0.59037	12.0674	0.939604	2.44614	1.50241	0.214181	1.17234	0.780306	1251.06	13.3313	1256.29	10.8289	1265.28	18.332	1265.28	18.332	98.8759
GBDS-22-Spot 44	144.039	68306.9	3.61726	12.0511	0.786034	2.40503	1.28128	0.210298	1.01184	0.789712	1230.41	11.3337	1244.1	9.18933	1267.87	15.3453	1267.87	15.3453	97.0451
GBDS-22-Spot 297	330.703	82369.8	1.69491	11.9769	0.816693	2.4462	1.5138	0.212581	1.2746	0.841986	1242.55	14.4048	1256.31	10.9111	1279.93	15.8984	1279.93	15.8984	97.0799
GBDS-22-Spot 244	180.008	64784.2	4.46168	11.7487	0.764721	2.62919	1.46834	0.224129	1.25349	0.853675	1303.66	14.7948	1308.84	10.8015	1317.32	14.8249	1317.32	14.8249	98.9625
GBDS-22-Spot 104	267.921	246513	1.49329	11.5373	0.488036	2.79782	0.909386	0.234214	0.767335	0.843795	1356.54	9.38697	1354.95	6.80252	1352.43	9.41527	1352.43	9.41527	100.304
GBDS-22-Spot 154	308.169	119231	3.7288	11.3797	0.851352	2.76075	1.67954	0.227954	1.44778	0.862007	1323.76	17.3255	1344.99	12.5197	1378.91	16.363	1378.91	16.363	96.0007
GBDS-22-Spot 134	23.7015	19331.4	2.87213	11.2509	1.11271	2.94833	1.64754	0.240687	1.21501	0.737472	1390.27	15.1946	1394.42	12.4925	1400.75	21.3229	1400.75	21.3229	99.2514
GBDS-22-Spot 110	103.864	135748	2.29729	10.9095	0.629962	3.25947	1.19071	0.258012	1.01042	0.848582	1479.66	13.359	1471.44	9.25209	1459.58	11.976	1459.58	11.976	101.376
GBDS-22-Spot 230	429.645	26801.3	3.90825	10.5859	0.798471	3.25919	1.20902	0.250338	0.907835	0.750887	1440.22	11.7172	1471.37	9.39414	1516.59	15.0627	1516.59	15.0627	94.9639
GBDS-22-Spot 124	50.0762	148534	2.58623	10.4793	0.858237	3.59362	1.51939	0.273246	1.25379	0.82519	1557.25	17.3454	1548.12	12.0697	1535.66	16.1495	1535.66	16.1495	101.406
GBDS-22-Spot 27	423.728	368068	2.6431	10.3857	0.564484	3.59235	1.29482	0.270708	1.1653	0.899968	1544.4	16.0034	1547.84	10.2849	1552.53	10.5992	1552.53	10.5992	99.4762
GBDS-22-Spot 140	500.581	202783	9.66435	10.3831	0.622226	3.51342	1.41229	0.264694	1.26783	0.897714	1513.81	17.1057	1530.24	11.1634	1553	11.6827	1553	11.6827	97.4768
GBDS-22-Spot 35	233.911	2.3555e+06	1.8656	10.2932	0.793768	3.71858	1.31248	0.277724	1.04524	0.796388	1579.89	14.6458	1575.37	10.5028	1569.31	14.8702	1569.31	14.8702	100.674
GBDS-22-Spot 245	183.617	170024	3.32971	9.63753	0.716763	4.2291	1.34772	0.295734	1.14132	0.84685	1670.12	16.7924	1679.69	11.068	1691.64	13.2174	1691.64	13.2174	98.728
GBDS-22-Spot 215	452.305	1.91356e+07	3.1524	9.62396	0.866083	4.46315	1.43432	0.311662	1.14332	0.797114	1748.88	17.5125	1724.15	11.8986	1694.24	15.9661	1694.24	15.9661	103.225
GBDS-22-Spot 131	448.811	79700.4	1.87847	9.4793	0.602297	4.07651	1.26916	0.280383	1.11714	0.880221	1593.29	15.7703	1649.62	10.3487	1722.11	11.0654	1722.11	11.0654	92.52
GBDS-22-Spot 92	81.9898	126458	2.05436	9.22235	0.820529	4.86799	1.62917	0.325746	1.40745	0.863908	1817.73	22.2931	1796.73	13.724	1772.43	14.9788	1772.43	14.9788	102.556
GBDS-22-Spot 54	103.162	146513	1.87044	9.03054	0.823139	4.96568	1.26044	0.325372	0.954539	0.757308	1815.91	15.1062	1813.5	10.6533	1810.71	14.9558	1810.71	14.9558	100.287
GBDS-22-Spot 64	87.9038	61178.4	1.2955	8.71604	0.902069	5.36383	1.63031	0.33922	1.358	0.832974	1882.92	22.1743	1879.1	13.9535	1874.86	16.2629	1874.86	16.2629	100.429
GBDS-22-Spot 183	273.088	19882.4	1.46226	8.41069	0.744462	5.17991	1.65493	0.316112	1.47803	0.893107	1770.72	22.8851	1849.32	14.0857	1938.91	13.3191	1938.91	13.3191	91.3254
GBDS-22-Spot 190	106.819	129677	1.12111	8.26153	0.565278	5.9103	1.05039	0.354289	0.885315	0.842843	1955.05	14.9301	1962.75	9.12232	1970.86	10.0749	1970.86	10.0749	99.1977
GBDS-22-Spot 97	74.7234	105357	2.19153	8.25084	0.799933	6.14684	1.47834	0.367991	1.24322	0.840957	2019.94	21.5587	1996.92	12.9112	1973.17	14.2542	1973.17	14.2542	102.37
GBDS-22-Spot 301	232.998	168398	2.29813	8.24293	0.572083	5.76459	1.32994	0.344776	1.2006	0.902753	1909.61	19.843	1941.11	11.5082	1974.88	10.1935	1974.88	10.1935	96.6949
GBDS-22-Spot 299	78.9935	122430	2.85385	8.21545	0.642927	6.17489	1.50675	0.368085	1.3627	0.904395	2020.38	23.635	2000.9	13.1677	1980.83	11.4478	1980.83	11.4478	101.997
GBDS-22-Spot 186	79.9848	40230.6	0.705629	8.07978	0.764381	6.16834	1.57413	0.361622	1.37608	0.874186	1989.86	23.5593	1999.97	13.7545	2010.42	13.5617	2010.42	13.5617	98.9772
GBDS-22-Spot 260	68.3737	98255.4	1.45347	8.05908	0.836379	5.45987	1.62876	0.319268	1.39761	0.858085	1786.15	21.8036	1894.31	13.9789	2014.97	14.8336	2014.97	14.8336	88.6442
GBDS-22-Spot 68	285.927	74778.3	1.72048	8.05385	0.763386	5.00113	1.77168	0.292253	1.59878	0.902408	1652.78	23.3088	1819.51	14.9928	2016.12	13.5372	2016.12	13.5372	81.9781
GBDS-22-Spot 106	82.3177	125093	3.96699	7.9788	0.830374	6.23969	1.33468	0.361234	1.04491	0.782895	1988.02	17.8753	2010.03	11.6807	2032.71	14.6949	2032.71	14.6949	97.8014
GBDS-22-Spot 264	569.224	188859	2.48845	7.93996	0.532697	5.63425	1.15753	0.324595	1.02767	0.887815	1812.13	16.2343	1921.35	9.98208	2041.34	9.41687	2041.34	9.41687	88.7717
GBDS-22-Spot 47	476.364	1.88415e+06	1.62945	7.92613	0.782469	6.62349	1.31126	0.380922	1.05221	0.802443	2080.59	18.7107	2062.48	11.5684	2044.42	13.8285	2044.42	13.8285	101.769
GBDS-22-Spot 158	211.279	79508.3	2.34522	7.91374	0.774997	5.95318	1.30323	0.341836	1.04776	0.803969	1895.5	17.2068	1969.03	11.3302	2047.18	13.6921	2047.18	13.6921	92.5905
GBDS-22-Spot 213	73.4841	50948.3	3.67666	7.90481	0.584185	6.04015	1.07793	0.346439	0.905907	0.840411	1917.57	15.026	1981.65	9.39075	2049.18	10.3202	2049.18	10.3202	93.5775
GBDS-22-Spot 159	576.11	499072	5.11979	7.87795	0.707297	6.67511	1.44692	0.381557	1.26226	0.87238	2083.55	22.473	2069.33	12.7783	2055.19	12.4865	2055.19	12.4865	101.38
GBDS-22-Spot 22	343.829	146253	1.73359	7.86988	0.576898	5.99425	1.1565	0.342287	1.00234	0.8667	1897.66	16.477	1975.01	10.0643	2057	10.1823	2057	10.1823	92.2539
GBDS-22-Spot 8	149.232	102910	1.87512	7.76693	0.669017	6.84307	1.45173	0.385646	1.28838	0.887482	2102.6	23.1154	2091.31	12.8619	2080.2	11.775	2080.2	11.775	101.077
GBDS-22-Spot 304	186.541	333878	3.5772	7.75688	0.606282	6.70433	1.14108	0.377337	0.966692	0.847171	2063.83	17.0725	2073.19	10.0828	2082.48	10.6679	2082.48	10.6679	99.1044
GBDS-22-Spot 112	262.391	160131	1.87685	7.69672	1.17608	6.82759	1.91507	0.381294	1.5114	0.789213	2082.33	26.8951	2089.31	16.9627	2096.18	20.6644	2096.18	20.6644	99.3393
GBDS-22-Spot 133	180.18	172334	1.63618	7.64658	0.643556	6.76752	1.13419	0.375478	0.933926	0.823431	2055.13	16.4347	2081.49	10.0341	2107.65	11.2917	2107.65	11.2917	97.5077
GBDS-22-Spot 248	216.702	552277	3.08415	7.62551	0.820883	6.74876	1.47071	0.373405	1.22031	0.829738	2045.4	21.388	2079.03	13.0069	2112.49	14.396	2112.49	14.396	96.8243
GBDS-22-Spot 253	222.634	236395	1.68209	7.58348	0.73628	6.85369	1.29567	0.377121	1.06614	0.822849	2062.82	18.821	2092.69	11.4814	2122.18	12.898	2122.18	12.898	97.2029
GBDS-22-Spot 82	67.421	254705	2.12467	7.57967	0.784126	7.13017	1.37259	0.392137	1.12656	0.820759	2132.73	20.4565	2127.82	12.2234	2123.06	13.735	2123.06	13.735	100.456
GBDS-22-Spot 31	89.9766	964105	1.96179	7.57132	0.861762	7.25911	1.3477	0.398788	1.03617	0.768847	2163.46	19.0433	2143.8	12.028	2124.99	15.0919	2124.99	15.0919	101.81
GBDS-22-Spot 42	558.887	11099.8	2.09902	7.56301	0.745941	5.62608	1.38393	0.308737	1.16569	0.842305	1734.49	17.7272	1920.1	11.932	2126.91	13.0626	2126.91	13.0626	81.5496
GBDS-22-Spot 150	119.87	379075	3.64468	7.51719	0.880062	7.11126	1.46841	0.387873	1.17546	0.800501	2112.96	21.1772	2125.45	13.0725	2137.55	15.3908	2137.55	15.3908	98.8496
GBDS-22-Spot 128	48.5659	32139.6	2.30328	7.50822	0.580322	7.07021	0.952175	0.385174	0.754893	0.792809	2100.41	13.5318	2120.3	8.47041	2139.64	10.1455	2139.64	10.1455	98.1665
GBDS-22-Spot 145	83.8772	86785.3	6.29668	7.37178	0.644497	7.5031	1.33953	0.40133	1.1743	0.876646	2175.16	21.68	2173.36	12.0024	2171.64	11.2302	2171.64	11.2302	100.162
GBDS-22-Spot 139	135.739	130464	2.90215	7.36551	0.629602	7.18327	1.2522	0.383895	1.08241	0.864405	2094.45	19.3563	2134.43	11.1614	2173.13	10.9689	2173.13	10.9689	96.3798
GBDS-22-Spot 192	323.113	371904	8.1252	7.35848	0.662679	5.94228	1.27704	0.31727	1.09165	0.854825	1776.38	16.9495	1967.44	11.0995	2174.79	11.5407	2174.79	11.5407	81.6807
GBDS-22-Spot 48	42.0721	230019	2.5728	7.33485	0.817645	7.48784	1.48588	0.398507	1.24068	0.834982	2162.16	22.7904	2171.53	13.3106	2180.39	14.2314	2180.39	14.2314	99.1639
GBDS-22-Spot 122	112.268	334967	1.51792	7.31529	0.84265	7.74541	1.30527	0.411116	0.996831	0.763697	2220.02	18.7216	2201.89	11.7385	2185.04	14.6592	2185.04	14.6592	101.601
GBDS-22-Spot 34	63.3242	197730	2.64739	7.16788	0.59561	7.79483	1.01361	0.405401	0.820159	0.809144	2193.86	15.2511	2207.61	9.12206	2220.38	10.3208	2220.38	10.3208	98.8055
GBDS-22-Spot 175	198.701	398593	1.75154	7.14772	0.752802	7.78312	1.37602	0.403654	1.15183	0.837075	2185.84	21.3529	2206.26	12.3817	2225.26	13.0385	2225.26	13.0385	98.2287
GBDS-22-Spot 146	128.528	15071	2.38305	6.79791	1.6106	8.40448	2.21285	0.414547	1.51746	0.685747	2235.68	28.6678	2275.66	20.0823	2311.77	27.6426	2311.77	27.6426	96.7085
GBDS-22-Spot 294	92.6498	66502.4	2.69192	6.73116	0.969361	9.1755	1.36405	0.448134	0.959666	0.703544	2386.95	19.1443	2355.67	12.4898	2328.69	16.6057	2328.69	16.6057	102.502
GBDS-22-Spot 210	85.0698	9897.05	1.62071	6.70492	1.8087	8.31523	2.04805	0.404535	0.960787	0.469124	2189.89	17.839	2265.98	18.5652	2335.38	30.9666	2335.38	30.9666	93.7701
GBDS-22-Spot 114	177.232	9687	3.16858	6.50804	1.25238	7.76862	1.8527	0.366844	1.3653	0.736923	2014.53	23.6216	2204.58	16.6681	2386.26	21.3269	2386.26	21.3269	84.4223
GBDS-22-Spot 194	120.754	486783	1.96966	6.35962	0.797356	9.50653	1.42938	0.438673	1.18631	0.829952	2344.7	23.3184	2388.18	13.133	2425.46	13.5224	2425.46	13.5224	96.67
GBDS-22-Spot 275	85.349	120450	1.66228	5.96389	0.801897	10.7841	1.42474	0.466662	1.17765	0.826569	2468.91	24.1551	2504.7	13.2397	2533.83	13.4551	2533.83	13.4551	97.4377
GBDS-22-Spot 251	606.701	441852	50.4733	5.85935	1.99546	9.59747	2.25457	0.408032	1.04939	0.465451	2205.92	19.6037	2396.93	20.7352	2563.46	33.3819	2563.46	33.3819	86.0525
GBDS-22-Spot 38	511.351	374578	3.48908	5.80028	0.647395	11.0047	1.49084	0.463144	1.34294	0.900793	2453.43	27.4034	2523.53	13.8776	2580.39	10.8133	2580.39	10.8133	95.0795
GBDS-22-Spot 199	40.0533	286335	2.65748	5.73251	0.765364	11.7833	1.4558	0.490115	1.23837	0.850648	2571.17	26.2573	2587.34	13.6264	2600	12.7565	2600	12.7565	98.8914
GBDS-22-Spot 273	227.818	14622.3	1.38925	5.63445	0.828881	10.4451	1.39994	0.427025	1.12818	0.805876	2292.29	21.763	2475.06	12.9734	2628.72	13.7771	2628.72	13.7771	87.2018
GBDS-22-Spot 152	74.0196	436612	3.8601	5.4022	0.707899	13.3339	1.49937	0.522655	1.32174	0.881529	2710.43	29.247	2703.59	14.1632	2698.46	11.6885	2698.46	11.6885	100.444
GBDS-22-Spot 201	185.867	98453.8	2.2011	5.37297	0.644262	13.0958	1.10699	0.510546	0.900198	0.813193	2658.96	19.6137	2686.58	10.4432	2707.42	10.6317	2707.42	10.6317	98.2102
GBDS-22-Spot 130	435.772	155760	2.2295	5.36194	0.564315	11.8313	1.16025	0.460301	1.01377	0.873751	2440.89	20.5996	2591.14	10.8632	2710.81	9.3094	2710.81	9.3094	90.0428
GBDS-22-Spot 162	230.299	240918	1.44068	5.13157	0.579649	14.2799	1.09769	0.531697	0.932166	0.849206	2748.6	20.8595	2768.48	10.4167	2783	9.49543	2783	9.49543	98.7638
GBDS-22-Spot 291	207.348	659805	4.5028	4.70528	0.639182	16.2344	1.07743	0.554256	0.86735	0.80502	2842.85	19.9389	2890.7	10.3056	2924.2	10.3434	2924.2	10.3434	97.2179
GBDS-22-Spot 259	1263.21	110615	3.56489	4.51106	1.68484	14.5973	2.0343	0.477791	1.14004	0.560409	2517.64	23.761	2789.36	19.3339	2992.2	27.1037	2992.2	27.1037	84.14
GBDS-22-Spot 315	69.0665	451006	2.68653	4.01162	0.917449	21.4414	1.61759	0.624109	1.33225	0.8236	3126.25	33.0029	3158.76	15.6941	3179.47	14.5337	3179.47	14.5337	98.326
GBDS-22-Spot 143	85.6832	253415	2.99149	3.9964	0.720221	20.9123	1.33652	0.606399	1.12587	0.842385	3055.57	27.3976	3134.54	12.9522	3185.49	11.4036	3185.49	11.4036	95.9213
GBDS-22-Spot 237	110.445	468483	3.95848	3.88058	0.653891	19.9053	1.34097	0.56047	1.17073	0.873052	2868.57	27.1067	3086.77	12.9653	3231.96	10.3156	3231.96	10.3156	88.7563
GBDS-22-Spot 96	207.054	439346	6.65354	3.1507	0.813597	31.0182	1.49307	0.709106	1.25192	0.83849	3455.09	33.4843	3519.63	14.6879	3556.56	12.5204	3556.56	12.5204	97.147
GBDS-22-Spot 6	275.542	242301	1.69211	2.90577	0.899086	34.6343	1.43011	0.730222	1.11214	0.777663	3534.24	30.2577	3628.28	14.1145	3680.6	13.725	3680.6	13.725	96.0235

## Sheet: LV Ray Gas Unit 1-2
Table _____. U-Pb geochronologic analyses.
							Isotope ratios						Apparent ages (Ma)
Analysis	U	206Pb	U/Th	206Pb*	±	207Pb*	±	206Pb*	±	error	206Pb*	±	207Pb*	±	206Pb*	±	Best age	±	Conc
	(ppm)	204Pb		207Pb*	(%)	235U*	(%)	238U	(%)	corr.	238U*	(Ma)	235U	(Ma)	207Pb*	(Ma)	(Ma)	(Ma)	(%)
Blum GBDS-9 15Mar2017-Spot 99	18.2566	6222.36	0.725202	18.3553	2.58357	0.484476	4.16684	0.064524	3.26921	0.784577	403.08	12.774	401.139	13.809	390.933	57.9666	403.08	12.774	103.107
Blum GBDS-9 15Mar2017-Spot 175	2519.44	386030	68.7217	17.5893	1.03399	0.5363	2.785	0.0684454	2.58594	0.928525	426.783	10.6789	435.982	9.87188	485.807	22.8143	426.783	10.6789	87.8503
Blum GBDS-9 15Mar2017-Spot 9	15.7422	11198.5	1.15552	17.9767	2.21178	0.530637	4.13301	0.0692143	3.4914	0.844758	431.421	14.5697	432.233	14.5496	437.51	49.2412	431.421	14.5697	98.6083
Blum GBDS-9 15Mar2017-Spot 145	1763.88	1.53491e+07	13.6234	17.5081	1.00542	0.556535	3.1272	0.0706998	2.96117	0.946907	440.37	12.6047	449.268	11.3537	496.015	22.1562	440.37	12.6047	88.7817
Blum GBDS-9 15Mar2017-Spot 86	1948	514321	43.5672	17.4819	0.92603	0.571713	2.28567	0.0725193	2.08967	0.914252	451.316	9.10847	459.122	8.44224	499.312	20.3956	451.316	9.10847	90.3877
Blum GBDS-9 15Mar2017-Spot 34	1030.75	435336	3.30069	17.4875	1.00829	0.58987	2.97838	0.0748464	2.80252	0.940954	465.288	12.5803	470.785	11.2208	498.609	22.1992	465.288	12.5803	93.3172
Blum GBDS-9 15Mar2017-Spot 3	246.455	48674.9	4.13136	17.6032	0.966993	0.598713	2.90434	0.076471	2.73864	0.942945	475.024	12.5414	476.417	11.0444	484.108	21.3515	475.024	12.5414	98.1236
Blum GBDS-9 15Mar2017-Spot 112	347.157	121786	4.555	17.4213	1.10015	0.642801	2.67504	0.0812542	2.43834	0.911516	503.605	11.8122	504.039	10.6284	506.949	24.1981	503.605	11.8122	99.3403
Blum GBDS-9 15Mar2017-Spot 106	615.06	79137.8	4.51321	17.0433	0.97793	0.659673	3.13935	0.0815773	2.98314	0.950244	505.531	14.5046	514.414	12.6706	555.007	21.3205	505.531	14.5046	91.0855
Blum GBDS-9 15Mar2017-Spot 214	218.447	77375	3.56043	17.2687	1.00401	0.658827	2.41915	0.0825506	2.20097	0.90981	511.329	10.8194	513.896	9.75611	526.308	22.0108	511.329	10.8194	97.1539
Blum GBDS-9 15Mar2017-Spot 141	126.781	29633	3.21918	16.9661	1.02559	0.677405	2.41888	0.083391	2.1907	0.905665	516.332	10.8701	525.205	9.91904	564.894	22.3427	516.332	10.8701	91.4034
Blum GBDS-9 15Mar2017-Spot 144	155.906	15924.1	3.42613	16.8845	1.27196	0.681885	3.02113	0.0835384	2.74032	0.907052	517.209	13.6195	527.913	12.4376	575.393	27.6331	517.209	13.6195	89.8879
Blum GBDS-9 15Mar2017-Spot 91	135.155	16497.9	3.21696	17.1499	1.05302	0.672735	2.65439	0.0837132	2.43659	0.917946	518.249	12.1334	522.374	10.84	541.421	23.0265	518.249	12.1334	95.7201
Blum GBDS-9 15Mar2017-Spot 26	241.417	75062.1	2.80749	17.1637	0.948807	0.672497	2.97952	0.0837506	2.82441	0.947942	518.471	14.0704	522.229	12.1653	539.632	20.7527	518.471	14.0704	96.0787
Blum GBDS-9 15Mar2017-Spot 66	137.201	84320.4	1.86859	16.9018	1.08236	0.684713	2.62651	0.0839709	2.39313	0.911143	519.781	11.9508	529.619	10.8395	573.206	23.5339	519.781	11.9508	90.6796
Blum GBDS-9 15Mar2017-Spot 103	110.14	21998.3	1.75057	17.0056	1.11971	0.684146	2.42416	0.084417	2.15007	0.886935	522.433	10.7896	529.277	9.99942	559.837	24.4063	522.433	10.7896	93.3188
Blum GBDS-9 15Mar2017-Spot 218	151.453	43185.1	4.22668	17.2876	1.10208	0.677269	3.30418	0.0849541	3.11497	0.942736	525.626	15.7234	525.122	13.5481	523.867	24.1704	525.626	15.7234	100.336
Blum GBDS-9 15Mar2017-Spot 92	195.978	40708.6	4.81696	17.1117	1.2613	0.684573	2.6608	0.0849966	2.34286	0.880509	525.878	11.8315	529.534	10.9797	546.253	27.5638	525.878	11.8315	96.2702
Blum GBDS-9 15Mar2017-Spot 87	13.5741	5266.23	2.77524	16.8678	2.2965	0.69461	3.269	0.0850132	2.32647	0.711676	525.977	11.7508	535.567	13.6064	577.585	49.8947	525.977	11.7508	91.0649
Blum GBDS-9 15Mar2017-Spot 154	280.779	89045	105.91	17.1681	1.00525	0.692011	2.98301	0.086203	2.80853	0.941508	533.042	14.3684	534.008	12.3884	539.067	22.0056	533.042	14.3684	98.8824
Blum GBDS-9 15Mar2017-Spot 102	207.948	78196.2	2.57624	17.2755	1.06785	0.692914	2.49952	0.0868555	2.25994	0.904147	536.913	11.6424	534.55	10.3884	525.412	23.4246	536.913	11.6424	102.189
Blum GBDS-9 15Mar2017-Spot 58	260.068	71536.4	5.2602	16.6912	0.796799	0.722466	2.40483	0.0874967	2.26899	0.943514	540.715	11.7683	552.122	10.2423	600.376	17.2507	540.715	11.7683	90.0628
Blum GBDS-9 15Mar2017-Spot 78	139.66	91217.9	1.21902	16.882	1.037	0.717586	3.1517	0.0878991	2.97621	0.944319	543.1	15.5017	549.241	13.3707	575.734	22.5496	543.1	15.5017	94.3317
Blum GBDS-9 15Mar2017-Spot 50	332.939	62917.3	3.99052	16.9341	0.998366	0.719301	2.08206	0.0883814	1.82709	0.877538	545.957	9.5644	550.254	8.84491	569.049	21.7473	545.957	9.5644	95.942
Blum GBDS-9 15Mar2017-Spot 90	525.325	150137	1.48257	16.4936	0.929744	0.739214	2.558	0.0884656	2.38305	0.931608	546.456	12.4856	561.947	11.0399	626.094	20.0633	546.456	12.4856	87.2801
Blum GBDS-9 15Mar2017-Spot 121	457.542	137263	3.07447	17.2105	0.787106	0.710022	2.13276	0.0886653	1.9822	0.929407	547.638	10.407	544.76	8.99193	533.668	17.2463	547.638	10.407	102.618
Blum GBDS-9 15Mar2017-Spot 30	276.716	52967	9.17251	16.7995	0.938943	0.728568	2.9841	0.0888083	2.83253	0.949208	548.486	14.8935	555.712	12.7717	586.396	20.3543	548.486	14.8935	93.5351
Blum GBDS-9 15Mar2017-Spot 201	81.5593	39400.9	3.39099	17.0947	1.13023	0.719098	2.66396	0.0891945	2.41232	0.905538	550.771	12.7346	550.134	11.3152	548.47	24.7051	550.771	12.7346	100.42
Blum GBDS-9 15Mar2017-Spot 122	41.5845	19653	1.17896	17.0277	1.62088	0.730284	3.54607	0.0902267	3.15394	0.889419	556.878	16.8264	556.72	15.1979	557.042	35.3509	556.878	16.8264	99.9705
Blum GBDS-9 15Mar2017-Spot 107	139.677	30160.7	2.31397	16.3943	0.952037	0.766393	2.43118	0.091166	2.23702	0.920138	562.429	12.0484	577.692	10.7109	639.14	20.4819	562.429	12.0484	87.9979
Blum GBDS-9 15Mar2017-Spot 21	67.806	12277.2	2.79463	16.1832	1.14823	0.784114	2.84805	0.0920728	2.60632	0.915127	567.784	14.1653	587.827	12.7103	666.915	24.585	567.784	14.1653	85.1359
Blum GBDS-9 15Mar2017-Spot 88	273.95	349330	8.71115	16.4052	0.888177	0.777553	2.72897	0.0925549	2.58039	0.945555	570.629	14.0916	584.087	12.1215	637.713	19.1243	570.629	14.0916	89.4806
Blum GBDS-9 15Mar2017-Spot 123	33.5797	7855.09	1.89541	16.6437	1.29973	0.773742	2.64374	0.0934402	2.30219	0.870807	575.851	12.6823	581.907	11.7104	606.536	28.1311	575.851	12.6823	94.9409
Blum GBDS-9 15Mar2017-Spot 27	64.0067	63722.2	6.93533	15.8685	1.30705	0.814511	2.56904	0.0937822	2.21169	0.860903	577.867	12.2245	604.981	11.71	708.817	27.8149	577.867	12.2245	81.5255
Blum GBDS-9 15Mar2017-Spot 111	16.2046	3720.65	2.03093	16.7964	1.78651	0.774067	3.15922	0.0943369	2.60559	0.824756	581.135	14.4796	582.093	13.9974	586.78	38.7478	581.135	14.4796	99.0379
Blum GBDS-9 15Mar2017-Spot 213	523.864	118595	5.312	16.7888	0.98826	0.777363	2.58883	0.0946956	2.39278	0.92427	583.248	13.3431	583.978	11.4974	587.758	21.4203	583.248	13.3431	99.2326
Blum GBDS-9 15Mar2017-Spot 135	176.099	74171.3	2.35766	16.2685	0.910474	0.815175	2.72488	0.0962244	2.56826	0.942525	592.244	14.5326	605.353	12.426	655.692	19.5314	592.244	14.5326	90.3235
Blum GBDS-9 15Mar2017-Spot 93	102.732	20453.9	12.6486	16.3804	1.21943	0.811618	2.78675	0.0964635	2.50579	0.89918	593.65	14.2112	603.361	12.6776	640.971	26.236	593.65	14.2112	92.6174
Blum GBDS-9 15Mar2017-Spot 191	101.245	62999.4	2.72635	16.2258	0.989051	0.825148	2.95283	0.0971464	2.78227	0.942236	597.664	15.8811	610.916	13.5559	661.293	21.1769	597.664	15.8811	90.378
Blum GBDS-9 15Mar2017-Spot 2	32.0003	6638.25	2.45359	16.4337	1.71794	0.818767	3.40333	0.0976299	2.93791	0.863246	600.504	16.8455	607.36	15.5579	633.98	36.9664	600.504	16.8455	94.7198
Blum GBDS-9 15Mar2017-Spot 22	285.199	170940	4.09635	16.8319	0.928959	0.801212	2.72251	0.0978515	2.55912	0.939986	601.806	14.7039	597.512	12.2971	582.207	20.1738	601.806	14.7039	103.366
Blum GBDS-9 15Mar2017-Spot 188	243.286	87232.9	5.57937	16.4633	0.878785	0.825803	2.24519	0.0986467	2.06606	0.920217	606.473	11.9587	611.281	10.3114	630.097	18.9416	606.473	11.9587	96.2507
Blum GBDS-9 15Mar2017-Spot 132	35.7875	9004.36	1.31316	16.6768	1.91045	0.832507	3.2655	0.100737	2.64833	0.811004	618.727	15.6242	615.002	15.0645	602.236	41.358	618.727	15.6242	102.738
Blum GBDS-9 15Mar2017-Spot 35	75.3035	69871.9	1.12251	15.897	1.11101	0.87895	2.77388	0.101383	2.54167	0.916285	622.51	15.0822	640.416	13.1762	705.005	23.661	622.51	15.0822	88.2986
Blum GBDS-9 15Mar2017-Spot 142	51.1301	59114.6	4.45193	15.8632	1.37297	0.901094	3.17581	0.103717	2.86369	0.90172	636.152	17.3474	652.312	15.2856	709.57	29.1931	636.152	17.3474	89.6532
Blum GBDS-9 15Mar2017-Spot 220	78.2487	27892	1.80256	16.0665	1.32857	0.892535	2.70549	0.104048	2.35681	0.871123	638.09	14.3183	647.73	12.9563	682.387	28.3719	638.09	14.3183	93.5085
Blum GBDS-9 15Mar2017-Spot 204	19.3162	34556.4	1.97933	15.6771	1.78337	0.929444	3.4589	0.105725	2.96371	0.856836	647.87	18.2677	667.342	16.92	734.61	37.7474	647.87	18.2677	88.1924
Blum GBDS-9 15Mar2017-Spot 11	23.1439	11430.3	2.88609	15.4185	2.61061	0.945054	4.78456	0.105727	4.00958	0.838025	647.885	24.7149	675.524	23.6089	769.686	54.986	647.885	24.7149	84.1752
Blum GBDS-9 15Mar2017-Spot 152	13.5239	3681.68	1.90071	16.3639	2.05067	0.890483	3.58952	0.105731	2.94608	0.820745	647.906	18.16	646.629	17.1696	643.13	44.0662	647.906	18.16	100.743
Blum GBDS-9 15Mar2017-Spot 136	77.5726	45571.9	1.84832	15.7101	1.20516	0.942831	3.27666	0.107473	3.04698	0.929904	658.056	19.0614	674.363	16.1472	730.154	25.5257	658.056	19.0614	90.1257
Blum GBDS-9 15Mar2017-Spot 7	153.712	77041.4	1.88327	15.8709	0.809949	0.946482	2.58942	0.108994	2.45949	0.949822	666.901	15.5825	676.269	12.7855	708.502	17.224	666.901	15.5825	94.1284
Blum GBDS-9 15Mar2017-Spot 118	98.584	14916.8	2.27218	16.0497	0.982476	0.941064	2.84411	0.109591	2.66903	0.93844	670.369	16.9935	673.439	14.0018	684.668	20.9818	670.369	16.9935	97.9116
Blum GBDS-9 15Mar2017-Spot 72	14.2398	4101.45	0.904173	15.8894	2.05981	0.951083	3.24038	0.109651	2.50145	0.771961	670.722	15.9345	678.666	16.04	706.015	43.8249	670.722	15.9345	95.0012
Blum GBDS-9 15Mar2017-Spot 215	29.3884	13349.7	1.18423	14.9709	1.55932	1.01345	2.79871	0.110088	2.32408	0.830409	673.258	14.8577	710.617	14.3047	831.409	32.5306	673.258	14.8577	80.978
Blum GBDS-9 15Mar2017-Spot 137	65.3352	60160.6	2.44647	15.5493	1.21264	0.98112	2.69866	0.110693	2.41087	0.893357	676.773	15.4889	694.179	13.5711	751.87	25.6061	676.773	15.4889	90.012
Blum GBDS-9 15Mar2017-Spot 40	42.6305	10604.9	2.86418	16.208	1.79774	0.942098	3.31503	0.110793	2.78524	0.840185	677.352	17.9086	673.979	16.3297	663.636	38.5351	677.352	17.9086	102.067
Blum GBDS-9 15Mar2017-Spot 128	53.5521	24024.2	1.72672	16.1194	1.31742	0.949792	2.42442	0.111087	2.03524	0.839477	679.059	13.1175	677.994	11.9922	675.41	28.1537	679.059	13.1175	100.54
Blum GBDS-9 15Mar2017-Spot 203	54.6662	11467.4	1.74528	15.7992	1.36971	0.9716	2.57021	0.11138	2.17483	0.846168	680.76	14.0505	689.288	12.8615	718.121	29.0625	680.76	14.0505	94.7974
Blum GBDS-9 15Mar2017-Spot 24	333.931	61793.3	6.8243	15.9882	1.11431	0.960302	3.43593	0.111403	3.25021	0.94595	680.888	21.0017	683.453	17.0923	692.814	23.7539	680.888	21.0017	98.2786
Blum GBDS-9 15Mar2017-Spot 219	332.403	294905	1.31497	15.8504	0.895083	0.971452	2.57088	0.111725	2.41003	0.937434	682.758	15.6133	689.212	12.8638	711.258	19.0347	682.758	15.6133	95.993
Blum GBDS-9 15Mar2017-Spot 12	29.1489	5901.81	1.82658	16.2586	1.50956	0.95297	2.96513	0.112422	2.5521	0.860704	686.797	16.6264	679.648	14.6922	656.967	32.3886	686.797	16.6264	104.541
Blum GBDS-9 15Mar2017-Spot 211	201.221	35727.8	2.80766	15.7609	1.09713	0.984165	3.21991	0.112548	3.02723	0.94016	687.526	19.7416	695.739	16.2181	723.27	23.2761	687.526	19.7416	95.058
Blum GBDS-9 15Mar2017-Spot 42	116.026	25598.1	1.34716	16.083	0.998353	0.966687	2.50341	0.112808	2.29573	0.917039	689.035	15.0023	686.755	12.495	680.2	21.3293	689.035	15.0023	101.299
Blum GBDS-9 15Mar2017-Spot 96	53.2198	288679	1.317	15.5342	1.29322	1.00251	2.77269	0.112997	2.45263	0.884566	690.129	16.0518	705.084	14.0953	753.921	27.3001	690.129	16.0518	91.5387
Blum GBDS-9 15Mar2017-Spot 146	81.9755	36677.6	3.65662	15.64	1.1124	0.996204	2.76506	0.113051	2.53142	0.915505	690.442	16.5746	701.881	14.0122	739.576	23.537	690.442	16.5746	93.3563
Blum GBDS-9 15Mar2017-Spot 8	195.164	46911.3	2.37738	15.8938	1.129	0.98101	2.9724	0.113133	2.74964	0.925057	690.918	18.0151	694.123	14.947	705.439	24.0413	690.918	18.0151	97.9416
Blum GBDS-9 15Mar2017-Spot 139	76.731	23544.1	1.93728	16.2106	1.06014	0.962323	2.1552	0.11319	1.87642	0.870651	691.248	12.2995	684.499	10.7321	663.287	22.7126	691.248	12.2995	104.215
Blum GBDS-9 15Mar2017-Spot 17	118.064	40635.9	2.14676	16.0345	0.945213	0.974882	2.66805	0.113421	2.495	0.935143	692.587	16.3842	690.977	13.3739	686.689	20.1795	692.587	16.3842	100.859
Blum GBDS-9 15Mar2017-Spot 202	44.7323	14550.5	1.18858	15.625	1.39133	1.0006	2.95307	0.113441	2.60477	0.882055	692.699	17.1077	704.116	14.9981	741.614	29.4208	692.699	17.1077	93.4042
Blum GBDS-9 15Mar2017-Spot 59	52.1537	23220.8	1.89108	15.7105	1.26613	0.996463	3.45174	0.113589	3.21114	0.930296	693.56	21.1151	702.012	17.4949	730.102	26.8171	693.56	21.1151	94.9949
Blum GBDS-9 15Mar2017-Spot 174	135.949	93553.4	1.49806	15.7253	1.06634	0.998812	2.5346	0.113965	2.29938	0.907194	695.734	15.1645	703.206	12.861	728.097	22.6034	695.734	15.1645	95.555
Blum GBDS-9 15Mar2017-Spot 20	78.7122	22297.6	1.85543	15.9356	1.41508	0.989924	2.79043	0.114461	2.40501	0.861877	698.604	15.9232	698.682	14.096	699.837	30.1516	698.604	15.9232	99.8238
Blum GBDS-9 15Mar2017-Spot 57	54.1486	23015.9	1.74264	15.6965	1.28824	1.00695	2.67181	0.114683	2.34073	0.876084	699.887	15.5245	707.333	13.6124	731.989	27.2907	699.887	15.5245	95.6145
Blum GBDS-9 15Mar2017-Spot 127	260.822	83758.4	1.83904	15.7858	0.933665	1.00141	3.25838	0.1147	3.12175	0.958067	699.988	20.7073	704.525	16.5556	719.921	19.8188	699.988	20.7073	97.2313
Blum GBDS-9 15Mar2017-Spot 4	159.324	34537.5	2.01629	15.2361	1.23592	1.03869	3.08	0.114828	2.82115	0.915959	700.725	18.732	723.266	15.935	794.698	25.9387	700.725	18.732	88.175
Blum GBDS-9 15Mar2017-Spot 38	83.3881	9994.32	2.15115	15.948	1.18166	0.992794	2.79239	0.114882	2.53004	0.90605	701.039	16.8062	700.145	14.1264	698.224	25.1709	701.039	16.8062	100.403
Blum GBDS-9 15Mar2017-Spot 94	298.257	71227.5	2.77742	15.5839	0.84186	1.01865	3.35286	0.115184	3.24544	0.967964	702.783	21.6092	713.236	17.1811	747.175	17.7707	702.783	21.6092	94.0586
Blum GBDS-9 15Mar2017-Spot 206	132.714	141611	2.39354	15.9181	0.997741	0.997996	2.51991	0.115268	2.31397	0.918275	703.269	15.4172	702.792	12.7812	702.213	21.2398	703.269	15.4172	100.15
Blum GBDS-9 15Mar2017-Spot 47	45.4352	16527.8	1.4808	15.9223	1.34888	0.997842	2.64509	0.11528	2.2753	0.860199	703.341	15.1611	702.714	13.4152	701.656	28.7234	703.341	15.1611	100.24
Blum GBDS-9 15Mar2017-Spot 14	230.213	62073.3	1.90577	16.0775	0.879393	0.990512	2.56097	0.115549	2.40525	0.939196	704.895	16.0605	698.982	12.9406	680.922	18.7862	704.895	16.0605	103.521
Blum GBDS-9 15Mar2017-Spot 209	404.558	155984	1.9417	15.9471	0.858437	0.998947	3.26867	0.115588	3.15393	0.964898	705.116	21.0659	703.275	16.5875	698.333	18.286	705.116	21.0659	100.971
Blum GBDS-9 15Mar2017-Spot 183	72.1052	51621.4	2.00726	15.8318	1.29389	1.01315	3.0966	0.116384	2.81333	0.90852	709.719	18.9069	710.467	15.8252	713.753	27.4726	709.719	18.9069	99.4348
Blum GBDS-9 15Mar2017-Spot 71	233.048	74754.7	5.01509	15.9123	1.10875	1.01149	3.1467	0.116783	2.94489	0.935867	712.02	19.8518	709.624	16.0681	702.997	23.5996	712.02	19.8518	101.284
Blum GBDS-9 15Mar2017-Spot 210	56.0145	15202.1	1.23052	14.7091	1.37716	1.09903	2.95079	0.117296	2.60971	0.884411	714.982	17.6615	752.881	15.6889	868.1	28.5489	714.982	17.6615	82.3617
Blum GBDS-9 15Mar2017-Spot 192	96.5934	298805	2.79544	15.9764	1.25487	1.01414	2.82323	0.117561	2.52901	0.895788	716.507	17.1499	710.961	14.4349	694.417	26.7273	716.507	17.1499	103.181
Blum GBDS-9 15Mar2017-Spot 115	274.495	1.14512e+06	3.05191	15.8734	1.10096	1.02387	3.43696	0.117924	3.25585	0.947306	718.601	22.1397	715.856	17.6567	708.196	23.4145	718.601	22.1397	101.469
Blum GBDS-9 15Mar2017-Spot 70	209.911	43091.4	2.27397	15.9949	0.850022	1.02624	2.75586	0.119102	2.6215	0.951243	725.392	17.9853	717.047	14.1734	691.938	18.1461	725.392	17.9853	104.835
Blum GBDS-9 15Mar2017-Spot 173	10.6215	5745.26	2.30812	15.1975	2.79804	1.08165	5.70278	0.119274	4.96917	0.871359	726.385	34.1363	744.439	30.097	800.009	58.6379	726.385	34.1363	90.7971
Blum GBDS-9 15Mar2017-Spot 179	16.1282	2380.66	1.21118	15.5529	1.80508	1.09582	3.38758	0.123662	2.8666	0.846209	751.607	20.337	751.326	17.9866	751.389	38.1043	751.607	20.337	100.029
Blum GBDS-9 15Mar2017-Spot 120	227.097	42020.2	4.26522	15.0337	0.783122	1.159	2.95428	0.126425	2.84859	0.964226	767.441	20.6102	781.483	16.1045	822.72	16.3495	767.441	20.6102	93.2809
Blum GBDS-9 15Mar2017-Spot 217	218.267	262394	3.58973	14.4342	0.852636	1.24634	2.41379	0.130532	2.25818	0.935534	790.902	16.8079	821.753	13.5993	907.063	17.5662	790.902	16.8079	87.1937
Blum GBDS-9 15Mar2017-Spot 125	14.843	5669.88	1.5851	14.8746	1.316	1.22323	3.10946	0.13202	2.81725	0.906025	799.38	21.1802	811.252	17.3733	844.873	27.3756	799.38	21.1802	94.6154
Blum GBDS-9 15Mar2017-Spot 100	32.9638	34323.5	2.26397	13.9793	1.34972	1.34022	2.72207	0.13594	2.36388	0.868412	821.665	18.2363	863.324	15.8301	972.744	27.5174	821.665	18.2363	84.4688
Blum GBDS-9 15Mar2017-Spot 5	22.117	14652	2.87951	14.494	1.29062	1.35262	3.48636	0.14225	3.23868	0.928955	857.372	26.0003	868.689	20.3556	898.54	26.6147	857.372	26.0003	95.4183
Blum GBDS-9 15Mar2017-Spot 77	371.074	377353	13.0727	14.2231	0.949969	1.46559	2.15803	0.15125	1.93769	0.897899	907.965	16.4108	916.314	13.0258	937.368	19.4598	937.368	19.4598	96.8632
Blum GBDS-9 15Mar2017-Spot 23	72.0799	11248.4	2.47106	13.9317	1.10699	1.40303	2.985	0.141827	2.77215	0.928693	854.986	22.1971	890.218	17.6981	979.656	22.5514	979.656	22.5514	87.2741
Blum GBDS-9 15Mar2017-Spot 134	81.5064	36826.5	1.53831	13.8247	0.957627	1.56319	2.75296	0.156803	2.58104	0.937549	938.987	22.5533	955.731	17.0491	995.353	19.4619	995.353	19.4619	94.337
Blum GBDS-9 15Mar2017-Spot 185	101.548	33909.7	1.39024	13.8122	1.15956	1.62513	3.16177	0.16287	2.94147	0.930322	972.704	26.5579	979.978	19.8771	997.178	23.5522	997.178	23.5522	97.5457
Blum GBDS-9 15Mar2017-Spot 48	10.9904	3266.71	2.2878	13.6869	2.76113	1.41766	4.32194	0.140787	3.32495	0.769319	849.112	26.4524	896.379	25.7382	1015.67	55.9502	1015.67	55.9502	83.601
Blum GBDS-9 15Mar2017-Spot 1	187.722	253660	2.06758	13.6569	0.996023	1.67018	3.3168	0.165502	3.16372	0.953846	987.281	28.9607	997.255	21.0685	1020.12	20.1662	1020.12	20.1662	96.7813
Blum GBDS-9 15Mar2017-Spot 114	88.578	110078	1.81302	13.6214	1.22031	1.58043	3.47193	0.156202	3.25041	0.936196	935.637	28.3082	962.54	21.5948	1025.38	24.7065	1025.38	24.7065	91.2482
Blum GBDS-9 15Mar2017-Spot 81	6.90468	8921.93	2.03788	13.5885	1.71283	1.42379	7.26017	0.14038	7.05523	0.971772	846.81	55.988	898.952	43.3303	1030.28	34.6295	1030.28	34.6295	82.1925
Blum GBDS-9 15Mar2017-Spot 216	150.782	72635.1	1.66213	13.4988	0.877958	1.70548	2.60199	0.167043	2.4494	0.941355	995.796	22.6006	1010.59	16.6562	1043.65	17.7324	1043.65	17.7324	95.4145
Blum GBDS-9 15Mar2017-Spot 150	200.589	60090.7	3.76562	13.4533	1.09709	1.73838	2.67678	0.169693	2.44163	0.912152	1010.42	22.8345	1022.86	17.2558	1050.49	22.1291	1050.49	22.1291	96.1856
Blum GBDS-9 15Mar2017-Spot 83	140.519	94574	1.53694	13.4188	1.01971	1.89717	3.34323	0.184717	3.18393	0.95235	1092.69	32.002	1080.1	22.233	1055.67	20.5544	1055.67	20.5544	103.507
Blum GBDS-9 15Mar2017-Spot 156	166.596	55314.7	2.35906	13.3586	1.24614	1.82902	3.62692	0.177283	3.40613	0.939124	1052.12	33.0651	1055.93	23.8139	1064.71	25.0652	1064.71	25.0652	98.8168
Blum GBDS-9 15Mar2017-Spot 29	83.6725	33355.9	0.682398	13.2829	0.832544	1.86449	3.1728	0.179696	3.06162	0.964959	1065.32	30.0637	1068.58	20.9723	1076.14	16.6957	1076.14	16.6957	98.9944
Blum GBDS-9 15Mar2017-Spot 149	227.879	383033	2.0168	13.2643	0.923631	1.83594	3.19614	0.176697	3.05977	0.957334	1048.91	29.6194	1058.41	21.0126	1078.93	18.523	1078.93	18.523	97.2174
Blum GBDS-9 15Mar2017-Spot 46	149.336	128858	1.92442	13.195	0.839131	1.62979	2.43164	0.156037	2.28226	0.93857	934.714	19.8582	981.777	15.3028	1089.44	16.8044	1089.44	16.8044	85.7974
Blum GBDS-9 15Mar2017-Spot 148	97.036	72968.4	1.60144	13.1123	0.885118	2.02181	2.74708	0.192357	2.60058	0.946671	1134.13	27.0453	1122.87	18.6648	1102.04	17.7011	1102.04	17.7011	102.912
Blum GBDS-9 15Mar2017-Spot 10	71.7919	379190	1.51586	13.057	1.15256	1.99908	3.31539	0.189392	3.10861	0.937629	1118.08	31.9099	1115.2	22.4429	1110.44	23.0223	1110.44	23.0223	100.688
Blum GBDS-9 15Mar2017-Spot 97	157.135	74865.9	2.1295	12.9744	1.12755	2.08923	3.28563	0.19668	3.0861	0.939271	1157.46	32.6974	1145.27	22.5661	1123.14	22.4989	1123.14	22.4989	103.056
Blum GBDS-9 15Mar2017-Spot 43	73.3552	235887	2.02715	12.8514	1.12351	2.11054	2.94578	0.196804	2.72311	0.924412	1158.13	28.8667	1152.25	20.2977	1142.07	22.3179	1142.07	22.3179	101.407
Blum GBDS-9 15Mar2017-Spot 31	57.5286	162029	1.49852	12.8291	1.15718	2.16022	2.60151	0.201087	2.32997	0.895625	1181.16	25.1467	1168.34	18.0585	1145.55	22.9938	1145.55	22.9938	103.108
Blum GBDS-9 15Mar2017-Spot 6	85.325	88361	1.76297	12.8005	1.04725	2.14427	2.68791	0.199156	2.4755	0.920978	1170.79	26.5034	1163.2	18.6145	1149.98	20.8074	1149.98	20.8074	101.809
Blum GBDS-9 15Mar2017-Spot 140	197.152	106673	0.933022	12.7144	0.781956	2.16066	2.46806	0.199329	2.34091	0.948482	1171.71	25.0806	1168.48	17.1331	1163.35	15.5056	1163.35	15.5056	100.719
Blum GBDS-9 15Mar2017-Spot 15	163.323	66369	1.15673	12.7058	0.857454	2.20361	2.24243	0.203154	2.07202	0.924006	1192.24	22.5537	1182.19	15.6631	1164.68	16.9983	1164.68	16.9983	102.366
Blum GBDS-9 15Mar2017-Spot 153	51.7339	43545.3	0.639042	12.646	1.05568	2.18109	2.68379	0.200131	2.46744	0.919388	1176.02	26.5249	1175.02	18.6864	1174.06	20.9066	1174.06	20.9066	100.167
Blum GBDS-9 15Mar2017-Spot 19	40.3855	72722.1	0.501416	12.6422	1.17272	2.12121	2.91765	0.194578	2.67159	0.915666	1146.13	28.0523	1155.73	20.1363	1174.67	23.216	1174.67	23.216	97.5703
Blum GBDS-9 15Mar2017-Spot 13	149.323	4.2538e+06	2.16056	12.6073	1.00042	2.13257	2.86392	0.195079	2.68351	0.937004	1148.83	28.2383	1159.42	19.7992	1180.13	19.7799	1180.13	19.7799	97.3477
Blum GBDS-9 15Mar2017-Spot 44	82.2382	78504.7	0.608044	12.6032	0.821442	2.18134	2.76407	0.199477	2.63919	0.95482	1172.51	28.2939	1175.11	19.2462	1180.77	16.2575	1180.77	16.2575	99.301
Blum GBDS-9 15Mar2017-Spot 157	81.4304	26480.8	1.84659	12.5758	0.896278	2.18507	2.67517	0.199384	2.52056	0.942205	1172.01	27.0116	1176.3	18.6371	1185.07	17.7239	1185.07	17.7239	98.8983
Blum GBDS-9 15Mar2017-Spot 129	66.3351	100494	0.985766	12.5427	0.986407	2.18896	2.52784	0.199213	2.32744	0.920723	1171.09	24.9241	1177.54	17.6203	1190.26	19.4551	1190.26	19.4551	98.3893
Blum GBDS-9 15Mar2017-Spot 101	143.85	74124.2	2.98182	12.5144	1.07597	2.17619	2.27438	0.197604	2.00377	0.881018	1162.43	21.3133	1173.46	15.8241	1194.71	21.228	1194.71	21.228	97.2981
Blum GBDS-9 15Mar2017-Spot 18	77.4203	974040	1.2414	12.479	1.23696	2.28647	3.28896	0.20703	3.04749	0.926581	1212.98	33.6961	1208.12	23.2381	1200.28	24.3665	1200.28	24.3665	101.057
Blum GBDS-9 15Mar2017-Spot 119	96.7614	205485	2.44085	12.4551	0.857802	2.17136	2.45394	0.19623	2.29913	0.936914	1155.04	24.3128	1171.91	17.0617	1204.07	16.8893	1204.07	16.8893	95.9279
Blum GBDS-9 15Mar2017-Spot 98	78.5595	40154.6	1.1683	12.4431	1.1779	2.25908	3.30316	0.203962	3.086	0.934258	1196.57	33.702	1199.62	23.2526	1205.95	23.1833	1205.95	23.1833	99.2218
Blum GBDS-9 15Mar2017-Spot 79	110.706	71612.4	1.92959	12.3911	1.07032	2.20525	2.81786	0.198269	2.60667	0.925054	1166.02	27.8041	1182.71	19.6879	1214.2	21.0577	1214.2	21.0577	96.0315
Blum GBDS-9 15Mar2017-Spot 41	112.295	60407.4	2.19361	12.3709	0.901353	2.30438	2.3858	0.206845	2.20899	0.925888	1211.99	24.4066	1213.64	16.8954	1217.41	17.735	1217.41	17.735	99.5547
Blum GBDS-9 15Mar2017-Spot 116	140.036	38144.8	3.45795	12.3353	1.1006	2.21015	2.40153	0.197815	2.13449	0.888802	1163.57	22.7239	1184.26	16.7902	1223.08	21.609	1223.08	21.609	95.1346
Blum GBDS-9 15Mar2017-Spot 110	19.8597	66988.4	2.75804	12.3206	1.15278	2.22405	2.37067	0.198822	2.07151	0.873809	1168.99	22.1471	1188.65	16.6067	1225.43	22.6474	1225.43	22.6474	95.394
Blum GBDS-9 15Mar2017-Spot 16	189.513	99072.6	1.42994	12.0006	0.886887	2.53956	2.94098	0.221132	2.80406	0.953447	1287.85	32.7339	1283.45	21.4287	1276.91	17.283	1276.91	17.283	100.856
Blum GBDS-9 15Mar2017-Spot 117	242.238	113641	4.69316	11.5652	1.23078	2.65606	2.64461	0.222883	2.34075	0.885104	1297.09	27.5022	1316.33	19.5105	1348.62	23.7579	1348.62	23.7579	96.1791
Blum GBDS-9 15Mar2017-Spot 36	850.059	743749	1.52896	11.45	0.861185	2.41948	2.73116	0.20101	2.59184	0.948986	1180.74	27.964	1248.4	19.6243	1367.9	16.5782	1367.9	16.5782	86.3177
Blum GBDS-9 15Mar2017-Spot 67	299.565	47012	1.68377	11.4309	0.97716	2.71265	2.95953	0.224989	2.79356	0.94392	1308.18	33.0757	1331.92	21.9599	1371.12	18.8024	1371.12	18.8024	95.4098
Blum GBDS-9 15Mar2017-Spot 49	26.301	38376.6	1.19138	11.2912	1.43909	2.77765	3.22119	0.227564	2.88186	0.894655	1321.72	34.4393	1349.55	24.0538	1394.74	27.6005	1394.74	27.6005	94.7644
Blum GBDS-9 15Mar2017-Spot 126	203.944	42253.7	2.88276	11.2202	0.897066	2.85532	2.85161	0.232457	2.70684	0.94923	1347.36	32.912	1370.21	21.4476	1406.84	17.1761	1406.84	17.1761	95.7725
Blum GBDS-9 15Mar2017-Spot 105	104.007	177579	3.02491	10.3264	0.927965	3.48353	3.25203	0.26101	3.11682	0.958424	1495.01	41.5886	1523.49	25.6612	1564.09	17.3965	1564.09	17.3965	95.5833
Blum GBDS-9 15Mar2017-Spot 131	135.187	143143	5.52279	9.87424	0.982463	3.74486	2.3391	0.268304	2.12277	0.907516	1532.19	28.9487	1581.01	18.7474	1647.57	18.2199	1647.57	18.2199	92.9967
Blum GBDS-9 15Mar2017-Spot 138	97.296	45427.4	1.89326	9.79491	1.16756	4.01004	2.7461	0.284995	2.48553	0.905114	1616.47	35.5367	1636.23	22.3215	1662.52	21.6117	1662.52	21.6117	97.2301
Blum GBDS-9 15Mar2017-Spot 39	48.5867	22126.4	1.41869	9.74332	0.813618	4.12512	2.4967	0.291629	2.36041	0.945412	1649.67	34.356	1659.29	20.4074	1672.28	15.0407	1672.28	15.0407	98.6475
Blum GBDS-9 15Mar2017-Spot 73	100.811	164206	3.23252	9.63578	0.936257	4.09588	2.8421	0.286366	2.68346	0.944182	1623.34	38.5102	1653.48	23.1992	1692.78	17.2632	1692.78	17.2632	95.8983
Blum GBDS-9 15Mar2017-Spot 32	88.9984	192254	1.71693	9.56949	0.959651	4.28245	3.0351	0.297351	2.87939	0.948698	1678.16	42.5438	1689.99	24.9889	1705.49	17.6662	1705.49	17.6662	98.3973
Blum GBDS-9 15Mar2017-Spot 109	122.756	90546.9	0.794425	6.44651	0.808636	7.90266	3.11508	0.369646	3.00829	0.96572	2027.73	52.339	2219.98	28.0843	2403.16	13.7478	2403.16	13.7478	84.3776
Blum GBDS-9 15Mar2017-Spot 207	233.634	336083	11.9564	6.04204	0.964927	10.7444	3.01718	0.471037	2.85873	0.947482	2488.11	59.0112	2501.27	28.0345	2512.7	16.2218	2512.7	16.2218	99.0214
Blum GBDS-9 15Mar2017-Spot 25	341.663	1.77638e+06	6.46741	5.7727	0.937703	11.9021	3.48895	0.498527	3.36058	0.963206	2607.46	72.0734	2596.73	32.6917	2589.08	15.6461	2589.08	15.6461	100.71
Blum GBDS-9 15Mar2017-Spot 177	257.298	169326	7.76451	5.73706	1.14934	11.2177	3.36881	0.466961	3.16668	0.940001	2470.22	64.983	2541.39	31.4166	2599.4	19.1594	2599.4	19.1594	95.0303
Blum GBDS-9 15Mar2017-Spot 178	256.283	128214	1.71302	5.64242	0.750076	12.0687	2.28647	0.494097	2.15994	0.944661	2588.38	46.047	2609.76	21.4431	2627.1	12.472	2627.1	12.472	98.5262
Blum GBDS-9 15Mar2017-Spot 208	143.549	203266	1.47091	5.61533	0.834479	12.4078	3.18092	0.505541	3.06951	0.964976	2637.56	66.4457	2635.76	29.8982	2635.1	13.8618	2635.1	13.8618	100.094
Blum GBDS-9 15Mar2017-Spot 84	74.8892	470616	0.991561	5.58769	0.891558	11.9159	2.44202	0.48311	2.27345	0.930972	2540.8	47.7402	2597.81	22.8799	2643.28	14.7987	2643.28	14.7987	96.1228
Blum GBDS-9 15Mar2017-Spot 37	41.382	77527	1.79055	5.56007	0.928788	11.4378	3.36552	0.461434	3.23483	0.961166	2445.89	65.8438	2559.52	31.4355	2651.51	15.4049	2651.51	15.4049	92.2451
Blum GBDS-9 15Mar2017-Spot 113	91.9069	61253.4	1.25687	5.5468	0.864454	12.3607	2.62248	0.497477	2.47591	0.94411	2602.95	53.0244	2632.19	24.6401	2655.47	14.3323	2655.47	14.3323	98.022
Blum GBDS-9 15Mar2017-Spot 85	173.343	144109	1.03593	5.54129	0.914538	12.303	2.39712	0.494664	2.21581	0.924362	2590.82	47.2742	2627.8	22.514	2657.12	15.1605	2657.12	15.1605	97.5049
Blum GBDS-9 15Mar2017-Spot 155	88.0116	113004	2.8134	5.50681	0.812695	12.319	3.11638	0.492225	3.00855	0.965398	2580.3	63.9762	2629.02	29.2755	2667.46	13.4616	2667.46	13.4616	96.7322
Blum GBDS-9 15Mar2017-Spot 108	372.613	70815.6	6.96749	5.45494	1.09121	12.6618	2.84344	0.501155	2.62572	0.923431	2618.76	56.51	2654.82	26.7647	2683.13	18.0453	2683.13	18.0453	97.601
Blum GBDS-9 15Mar2017-Spot 212	33.058	35047.4	2.24186	5.45212	0.96337	12.837	2.67991	0.507828	2.50076	0.933153	2647.35	54.2958	2667.76	25.25	2683.98	15.9294	2683.98	15.9294	98.6351
Blum GBDS-9 15Mar2017-Spot 124	117.786	3.61301e+06	2.42262	5.42889	0.745658	12.7718	2.66291	0.503097	2.55638	0.959995	2627.09	55.1594	2662.97	25.0805	2691.03	12.3206	2691.03	12.3206	97.6239
Blum GBDS-9 15Mar2017-Spot 147	22.948	5627.59	0.820992	5.20658	1.98454	13.4285	2.98079	0.507303	2.22412	0.74615	2645.11	48.256	2710.27	28.176	2759.91	32.5866	2759.91	32.5866	95.8402
Blum GBDS-9 15Mar2017-Spot 104	236.529	682943	2.67154	4.68614	0.952666	16.1222	2.57541	0.548185	2.39273	0.929068	2817.62	54.6168	2884.07	24.6278	2931.5	15.4031	2931.5	15.4031	96.1154
Blum GBDS-9 15Mar2017-Spot 33	76.3621	312093	3.78565	4.49395	1.02293	17.9068	2.55366	0.583895	2.33983	0.916264	2964.62	55.6059	2984.74	24.5628	2999.01	16.4439	2999.01	16.4439	98.8533
Blum GBDS-9 15Mar2017-Spot 89	95.2095	63084.5	3.9333	3.4769	1.04309	25.6451	2.7041	0.646969	2.49482	0.922606	3216.35	63.1784	3333.1	26.4324	3404.74	16.2338	3404.74	16.2338	94.467

## Sheet: MacDonnell B-3
Table _____. U-Pb geochronologic analyses.
							Isotope ratios						Apparent ages (Ma)
Analysis	U	206Pb	U/Th	206Pb*	±	207Pb*	±	206Pb*	±	error	206Pb*	±	207Pb*	±	206Pb*	±	Best age	±	Conc
	(ppm)	204Pb		207Pb*	(%)	235U*	(%)	238U	(%)	corr.	238U*	(Ma)	235U	(Ma)	207Pb*	(Ma)	(Ma)	(Ma)	(%)
MacDonnell B3-Spot 177	196.273	56418.1	0.522455	19.0411	1.21694	0.346197	2.69979	0.0478302	2.40997	0.892649	301.186	7.09155	301.857	7.04989	308.011	27.7063	301.186	7.09155	NA
MacDonnell B3-Spot 189	455.508	34643.5	0.869867	19.0003	1.20694	0.350692	2.48848	0.0483474	2.17619	0.874507	304.367	6.46969	305.241	6.56053	312.904	27.4629	304.367	6.46969	NA
MacDonnell B3-Spot 214	287.592	5366.79	2.56724	20.0034	2.35735	0.333438	3.74234	0.0483958	2.90654	0.776665	304.665	8.64923	292.187	9.50228	194.616	54.801	304.665	8.64923	NA
MacDonnell B3-Spot 183	223.838	55288.2	1.54695	18.4952	1.19599	0.365943	3.03075	0.0491089	2.78479	0.918846	309.048	8.40332	316.642	8.24461	373.865	26.8997	309.048	8.40332	NA
MacDonnell B3-Spot 255	160.809	5238.21	1.07538	18.6956	1.51723	0.362365	2.68151	0.0491557	2.21099	0.824533	309.336	6.67789	313.979	7.24217	349.557	34.2944	309.336	6.67789	NA
MacDonnell B3-Spot 294	206.241	5623.24	2.03103	19.6605	2.92966	0.349565	4.13924	0.0498667	2.92411	0.706436	313.703	8.95341	304.394	10.8868	234.667	67.6188	313.703	8.95341	NA
MacDonnell B3-Spot 195	277.273	5553.97	0.752972	17.1371	1.36151	0.40293	2.78002	0.0501021	2.42379	0.871864	315.148	7.45484	343.771	8.10737	543.015	29.7511	315.148	7.45484	NA
MacDonnell B3-Spot 111	197.774	34109.4	1.87372	18.464	1.28714	0.374946	3.55179	0.0502322	3.31036	0.932026	315.947	10.2068	323.313	9.83499	377.667	28.9327	315.947	10.2068	NA
MacDonnell B3-Spot 125	260.698	31225.8	0.964118	19.0083	1.18982	0.372127	2.90683	0.0513242	2.65217	0.912392	322.647	8.34653	321.229	8.0049	311.953	27.0647	322.647	8.34653	NA
MacDonnell B3-Spot 152	177.958	20852.7	2.16284	18.8256	1.21791	0.378094	2.79283	0.0516461	2.51328	0.899905	324.62	7.95658	325.635	7.78042	333.886	27.5881	324.62	7.95658	NA
MacDonnell B3-Spot 208	615.128	18583.7	4.82798	18.8348	1.35558	0.391167	2.52951	0.0534577	2.13561	0.844279	335.715	6.98609	335.222	7.222	332.793	30.7174	335.715	6.98609	NA
MacDonnell B3-Spot 126	286.662	19126.5	1.16443	18.9505	1.2353	0.423417	2.92461	0.0582207	2.65091	0.906417	364.796	9.40189	358.491	8.83373	318.854	28.1009	364.796	9.40189	NA
MacDonnell B3-Spot 25	584.754	37382.3	0.394922	18.646	1.35653	0.431017	2.81432	0.0583133	2.46581	0.876166	365.36	8.75854	363.898	8.60723	355.602	30.6253	365.36	8.75854	NA
MacDonnell B3-Spot 102	70.3335	48511.6	0.628126	18.4386	1.69396	0.437719	3.32076	0.0585614	2.85621	0.860107	366.871	10.186	368.643	10.2661	380.756	38.0862	366.871	10.186	NA
MacDonnell B3-Spot 224	112.602	7840.04	1.47038	19.1862	1.27218	0.428447	3.0443	0.0596448	2.76574	0.908498	373.465	10.0356	362.073	9.27175	290.694	29.0703	373.465	10.0356	NA
MacDonnell B3-Spot 18	429.612	7772.04	12.5007	19.0716	0.904963	0.447378	2.40814	0.0619084	2.23163	0.926704	387.221	8.38695	375.441	7.5581	304.357	20.6127	387.221	8.38695	NA
MacDonnell B3-Spot 272	419.243	193021	1.31885	18.0155	1.08271	0.48232	2.27171	0.0630478	1.99709	0.879116	394.134	7.63544	399.663	7.50556	432.709	24.1281	394.134	7.63544	NA
MacDonnell B3-Spot 305	367.253	48696.3	5.42746	18.2998	1.18998	0.477861	2.62531	0.0634507	2.34013	0.891373	396.577	9.00072	396.605	8.61964	397.72	26.6741	396.577	9.00072	NA
MacDonnell B3-Spot 20	313.207	29503.2	1.25602	18.3885	1.48126	0.47568	3.63461	0.0634671	3.31908	0.913187	396.676	12.7691	395.104	11.8968	386.874	33.2645	396.676	12.7691	NA
MacDonnell B3-Spot 112	137.454	8015.27	1.47227	18.6614	1.34516	0.470373	3.21149	0.0636905	2.9162	0.908052	398.03	11.2563	391.446	10.432	353.724	30.3808	398.03	11.2563	NA
MacDonnell B3-Spot 35	973.442	72055.9	1.51484	18.0477	1.04176	0.488252	2.34983	0.0639372	2.10629	0.896356	399.526	8.1597	403.719	7.82786	428.73	23.2253	399.526	8.1597	NA
MacDonnell B3-Spot 210	62.5473	3992.38	2.70557	19.0832	3.86042	0.461765	4.92512	0.0639382	3.05843	0.620986	399.532	11.8485	385.485	15.7989	303.016	88.0036	399.532	11.8485	NA
MacDonnell B3-Spot 17	242.648	23581	1.58643	17.7028	1.05622	0.503101	3.1239	0.0646226	2.93993	0.941107	403.677	11.5039	413.799	10.6172	471.617	23.3948	403.677	11.5039	85.5942
MacDonnell B3-Spot 167	816.826	30357.3	2.49702	18.278	0.978057	0.48805	2.52661	0.0647262	2.32963	0.922037	404.304	9.12951	403.581	8.41444	400.398	21.9133	404.304	9.12951	100.976
MacDonnell B3-Spot 215	293.295	10110.7	1.63607	18.3896	1.14485	0.486662	3.0016	0.0649362	2.7747	0.924405	405.575	10.9068	402.633	9.97729	386.745	25.7118	405.575	10.9068	104.869
MacDonnell B3-Spot 119	886.654	34157.2	1.10734	18.1047	0.875928	0.496006	2.20707	0.0651577	2.02581	0.917873	406.916	7.98856	408.995	7.43032	421.701	19.5519	406.916	7.98856	96.494
MacDonnell B3-Spot 307	84.923	7281.1	2.01288	18.4488	1.73464	0.487161	3.08929	0.065212	2.55632	0.827477	407.245	10.0885	402.974	10.2759	379.521	38.9876	407.245	10.0885	107.305
MacDonnell B3-Spot 10	136.122	4244.22	1.47177	19.241	2.65587	0.469831	3.85317	0.0655929	2.79164	0.724505	409.55	11.0776	391.072	12.5067	284.21	60.7347	409.55	11.0776	144.101
MacDonnell B3-Spot 38	497.04	131412	3.54446	17.8962	0.87295	0.506023	2.31236	0.0657083	2.14125	0.926004	410.247	8.51076	415.772	7.8892	447.489	19.4199	410.247	8.51076	91.6777
MacDonnell B3-Spot 4	153.436	102469	1.24507	17.4148	1.26841	0.524075	2.79873	0.0662216	2.4948	0.891404	413.352	9.98865	427.87	9.77218	507.815	27.8958	413.352	9.98865	81.3981
MacDonnell B3-Spot 71	644.551	21288.7	1.50343	18.0552	0.992532	0.507029	2.37195	0.0664236	2.1543	0.908242	414.573	8.65003	416.449	8.10317	427.806	22.1313	414.573	8.65003	96.9067
MacDonnell B3-Spot 289	50.0043	2258.65	0.67883	17.9295	2.37471	0.517505	3.67897	0.067324	2.8099	0.763775	420.013	11.4257	423.483	12.7398	443.365	52.8351	420.013	11.4257	94.733
MacDonnell B3-Spot 191	630.75	51498.5	3.66615	18.14	1.2639	0.511887	3.23689	0.0673752	2.97993	0.920617	420.323	12.1257	419.717	11.1283	417.342	28.2342	420.323	12.1257	100.714
MacDonnell B3-Spot 115	183.899	10011	1.97656	18.4338	1.21542	0.506116	3.30163	0.0676943	3.06977	0.929775	422.25	12.5467	415.834	11.2659	381.346	27.3094	422.25	12.5467	110.726
MacDonnell B3-Spot 52	242.596	33874.9	1.01978	17.5744	1.1255	0.53123	3.1469	0.0677409	2.93874	0.933854	422.531	12.0189	432.626	11.0859	487.686	24.8224	422.531	12.0189	86.64
MacDonnell B3-Spot 36	196.794	25335.1	1.80399	17.7436	1.33841	0.527648	3.75835	0.0679318	3.51196	0.934442	423.684	14.4012	430.248	13.1817	466.509	29.6468	423.684	14.4012	90.8199
MacDonnell B3-Spot 185	109.859	30886.5	2.56331	18.0253	1.1595	0.519919	3.31699	0.0679995	3.10773	0.936912	424.092	12.7555	425.098	11.5215	431.5	25.8594	424.092	12.7555	98.2833
MacDonnell B3-Spot 132	259.059	18339.3	2.40004	18.2577	1.08724	0.513641	2.50873	0.0680447	2.2609	0.90121	424.365	9.28547	420.895	8.64434	402.878	24.3495	424.365	9.28547	105.333
MacDonnell B3-Spot 158	332.752	32111.6	1.08183	18.0737	1.11995	0.519054	2.81589	0.0680688	2.58359	0.917504	424.51	10.6143	424.519	9.77007	425.518	24.9825	424.51	10.6143	99.7633
MacDonnell B3-Spot 192	86.1038	47350.6	0.799868	17.831	1.28694	0.530492	2.89785	0.0686345	2.5964	0.895976	427.924	10.7499	432.136	10.1992	455.6	28.5797	427.924	10.7499	93.9253
MacDonnell B3-Spot 281	248.474	25461.8	3.16472	17.3073	1.02364	0.548158	3.23801	0.0688371	3.07195	0.948715	429.146	12.7539	443.789	11.6417	521.376	22.4643	429.146	12.7539	82.3102
MacDonnell B3-Spot 62	149.309	3313.86	1.88793	19.509	1.14455	0.486865	2.72902	0.0689178	2.47741	0.907802	429.633	10.2968	402.772	9.07371	252.489	26.3382	429.633	10.2968	170.159
MacDonnell B3-Spot 302	69.2292	4479.9	1.78765	18.6196	1.45182	0.510619	2.81957	0.0689853	2.41706	0.857245	430.039	10.0552	418.865	9.6776	358.749	32.7458	430.039	10.0552	119.872
MacDonnell B3-Spot 65	136.978	6046.08	0.995255	18.5184	1.28675	0.513612	2.9629	0.0690123	2.66891	0.900775	430.203	11.107	420.875	10.209	371.04	28.9705	430.203	11.107	115.945
MacDonnell B3-Spot 64	573.416	60441	0.817522	17.5184	0.953576	0.549087	2.56191	0.0697947	2.37783	0.928148	434.919	10.0005	444.398	9.22086	494.729	21.0185	434.919	10.0005	87.9104
MacDonnell B3-Spot 146	439.851	53739.8	0.446742	17.7811	1.21183	0.543062	2.82371	0.0700643	2.55045	0.903227	436.543	10.7652	440.441	10.0909	461.811	26.8791	436.543	10.7652	94.5285
MacDonnell B3-Spot 56	142.805	25349.8	1.25149	17.6685	1.19951	0.549337	3.37882	0.0704249	3.15873	0.934863	438.715	13.3968	444.563	12.1649	475.881	26.5251	438.715	13.3968	92.19
MacDonnell B3-Spot 69	458.884	30170.6	60.4275	18.0521	0.947006	0.538683	2.64033	0.0705583	2.46466	0.933465	439.518	10.4716	437.556	9.3861	428.189	21.115	439.518	10.4716	102.646
MacDonnell B3-Spot 174	668.896	101019	1.04122	18.0569	0.85717	0.538826	2.16608	0.0705959	1.98926	0.918369	439.745	8.45597	437.65	7.70143	427.595	19.1143	439.745	8.45597	102.841
MacDonnell B3-Spot 175	256.618	117631	1.20248	17.8728	1.29546	0.544498	2.87299	0.0706116	2.56434	0.89257	439.839	10.9028	441.386	10.2846	450.405	28.7736	439.839	10.9028	97.6541
MacDonnell B3-Spot 204	61.0271	32840.5	1.65575	17.5041	1.45018	0.556806	3.59759	0.0707183	3.29236	0.915157	440.481	14.0179	449.446	13.0658	496.516	31.9669	440.481	14.0179	88.7145
MacDonnell B3-Spot 86	281.647	15366.6	1.82515	18.4526	0.935356	0.528248	2.66224	0.0707266	2.49251	0.936247	440.532	10.6135	430.646	9.344	379.057	21.0357	440.532	10.6135	116.218
MacDonnell B3-Spot 242	203.741	22380.1	1.58697	18.0662	1.39085	0.540397	3.68916	0.0708384	3.41693	0.926209	441.205	14.5713	438.686	13.142	426.442	31.0424	441.205	14.5713	103.462
MacDonnell B3-Spot 226	45.7128	2631.05	1.07092	19.7059	2.0826	0.497743	3.20005	0.0711689	2.42962	0.759246	443.194	10.4061	410.173	10.7987	229.292	48.1321	443.194	10.4061	193.288
MacDonnell B3-Spot 244	510.546	22577.8	0.988141	18.0959	1.19965	0.542576	2.60597	0.0712408	2.31343	0.88774	443.627	9.91781	440.121	9.30735	422.78	26.7732	443.627	9.91781	104.931
MacDonnell B3-Spot 190	308.42	11709.2	1.93283	18.4022	1.11316	0.534431	2.70101	0.0713589	2.46096	0.911126	444.337	10.5666	434.746	9.5524	385.205	25.0076	444.337	10.5666	115.351
MacDonnell B3-Spot 68	162.758	18010	1.04479	18.0223	1.47089	0.547374	3.40703	0.0715783	3.07316	0.902007	445.658	13.2331	443.275	12.2381	431.876	32.7851	445.658	13.2331	103.191
MacDonnell B3-Spot 279	381.833	24511.9	1.23719	17.6132	1.13352	0.561409	2.97307	0.0717472	2.7485	0.924466	446.673	11.8612	452.443	10.8546	482.853	25.0384	446.673	11.8612	92.5071
MacDonnell B3-Spot 303	91.5438	5669.36	1.46303	18.3912	2.17831	0.539465	3.3112	0.071988	2.49379	0.753138	448.122	10.7956	438.072	11.7823	386.549	48.9277	448.122	10.7956	115.929
MacDonnell B3-Spot 225	647.428	32238.4	2.32666	17.8354	1.01774	0.558562	2.62421	0.0722839	2.41882	0.921731	449.901	10.5112	450.59	9.54967	455.07	22.5859	449.901	10.5112	98.8641
MacDonnell B3-Spot 3	1135.13	189016	1.44514	17.5009	0.947881	0.569405	2.13825	0.0723053	1.91667	0.896375	450.029	8.33141	457.63	7.87742	496.937	20.872	450.029	8.33141	90.5607
MacDonnell B3-Spot 55	563.817	37823.9	1.87026	18.011	1.1219	0.561762	2.73108	0.073414	2.49	0.91173	456.691	10.9782	452.673	9.97505	433.264	24.9995	456.691	10.9782	105.407
MacDonnell B3-Spot 147	472.641	97300.9	1.90547	17.6515	1.07336	0.575669	2.57125	0.0737298	2.3365	0.908701	458.587	10.3427	461.674	9.53883	478.002	23.7284	458.587	10.3427	95.9384
MacDonnell B3-Spot 153	59.0637	6789.25	1.72773	18.0889	1.54186	0.56269	3.14453	0.0738531	2.74058	0.871537	459.328	12.1502	453.276	11.4974	423.649	34.4111	459.328	12.1502	108.422
MacDonnell B3-Spot 235	191.069	2.61624e+06	1.5229	17.395	1.18466	0.635312	3.47684	0.080186	3.2688	0.940162	497.233	15.6425	499.4	13.716	510.32	26.0234	497.233	15.6425	97.4356
MacDonnell B3-Spot 41	281.468	55987.8	1.03708	16.9125	1.10161	0.673602	2.91445	0.0826605	2.69824	0.925812	511.984	13.2802	522.9	11.9113	571.809	23.9538	511.984	13.2802	89.5375
MacDonnell B3-Spot 313	108.62	7375.19	1.324	17.3688	1.37648	0.670742	3.0425	0.0845306	2.71332	0.891806	523.109	13.633	521.163	12.403	513.616	30.2387	523.109	13.633	101.848
MacDonnell B3-Spot 117	68.71	4240.68	2.31328	18.2188	1.54621	0.652818	3.13773	0.0862979	2.73031	0.870154	533.605	13.9824	510.212	12.5845	407.654	34.5997	533.605	13.9824	130.897
MacDonnell B3-Spot 148	42.9097	3195.66	1.95913	18.2622	4.06636	0.651732	5.1804	0.0863594	3.20956	0.619558	533.97	16.4475	509.544	20.7579	402.33	91.0848	533.97	16.4475	132.719
MacDonnell B3-Spot 254	128.356	14494.5	1.62055	17.4572	1.33067	0.688709	3.02082	0.0872365	2.71195	0.897753	539.172	14.0273	532.024	12.51	502.456	29.3087	539.172	14.0273	107.307
MacDonnell B3-Spot 154	75.0316	11046.3	1.47754	16.9803	1.23592	0.73123	2.93183	0.0900922	2.65859	0.906804	556.082	14.1643	557.275	12.5745	563.077	26.9114	556.082	14.1643	98.7577
MacDonnell B3-Spot 287	46.741	3705.16	1.9512	17.5576	3.67016	0.715871	4.60731	0.0911986	2.78518	0.604514	562.622	15.0057	548.226	19.52	489.802	80.9963	562.622	15.0057	114.867
MacDonnell B3-Spot 121	233.095	18284.2	4.89059	16.8688	1.16002	0.757366	2.72198	0.0926998	2.46243	0.904645	571.484	13.4667	572.489	11.9118	577.425	25.1913	571.484	13.4667	98.9711
MacDonnell B3-Spot 33	321.552	18257.5	1.94783	16.9508	1.12875	0.762331	3.13227	0.0937609	2.92182	0.932812	577.741	16.1463	575.354	13.7585	566.903	24.587	577.741	16.1463	101.912
MacDonnell B3-Spot 169	163.378	13412.9	1.22195	16.847	1.24904	0.796738	2.93899	0.0973925	2.66036	0.905197	599.11	15.2203	594.987	13.2337	580.264	27.1236	599.11	15.2203	103.248
MacDonnell B3-Spot 30	42.353	9754.23	2.22885	16.7987	1.68606	0.807111	3.46524	0.0983779	3.02739	0.873645	604.896	17.4797	600.832	15.7162	586.492	36.5864	604.896	17.4797	103.138
MacDonnell B3-Spot 159	50.0533	3300.02	2.83523	17.1596	3.5939	0.799799	4.98801	0.099581	3.45891	0.693446	611.953	20.1934	596.715	22.5105	540.187	78.6023	611.953	20.1934	113.285
MacDonnell B3-Spot 181	55.412	34434.8	1.65651	16.4682	1.31703	0.878267	2.89956	0.104945	2.58319	0.89089	643.321	15.8159	640.046	13.7676	629.422	28.397	643.321	15.8159	102.208
MacDonnell B3-Spot 6	173.837	15334.4	1.69371	16.6653	1.21611	0.868003	2.63198	0.104959	2.33418	0.886853	643.408	14.2931	634.482	12.4187	603.734	26.3252	643.408	14.2931	106.571
MacDonnell B3-Spot 221	453.166	17263.9	2.58635	14.9604	1.97977	0.97295	3.44248	0.105614	2.81623	0.818082	647.225	17.3423	689.983	17.2392	832.882	41.2888	647.225	17.3423	77.7091
MacDonnell B3-Spot 300	783.396	2.14626e+06	1.9723	15.9918	1.20155	0.961377	2.49609	0.111552	2.18786	0.876515	681.756	14.1542	684.009	12.4235	692.34	25.6032	681.756	14.1542	98.4713
MacDonnell B3-Spot 227	210.15	70301.4	5.92568	15.7693	1.08928	1.03583	2.62371	0.118519	2.38691	0.909745	722.036	16.3042	721.842	13.5556	722.142	23.0989	722.036	16.3042	99.9852
MacDonnell B3-Spot 286	115.952	12587.4	1.23926	14.419	0.950365	1.44349	2.49483	0.151021	2.30673	0.924602	906.684	19.5106	907.172	14.966	909.237	19.5856	909.237	19.5856	99.7192
MacDonnell B3-Spot 46	182.059	16329.3	1.46472	14.3395	0.996123	1.54918	2.62189	0.161185	2.42529	0.925017	963.358	21.7023	950.166	16.1801	920.646	20.4976	920.646	20.4976	104.639
MacDonnell B3-Spot 278	27.4144	19150	1.66863	14.2134	1.38837	1.59594	3.41224	0.164589	3.11702	0.913482	982.23	28.3981	968.622	21.3037	938.747	28.4632	938.747	28.4632	104.632
MacDonnell B3-Spot 43	33.998	4464.02	0.220528	14.1852	2.61908	1.54329	3.87296	0.158843	2.8531	0.736673	950.346	25.2106	947.817	23.8673	942.835	53.6753	942.835	53.6753	100.797
MacDonnell B3-Spot 83	39.0543	3597.04	1.89517	14.0666	1.43008	1.63504	3.52417	0.166881	3.22097	0.913965	994.904	29.6953	983.804	22.2074	960.027	29.223	960.027	29.223	103.633
MacDonnell B3-Spot 45	72.1735	19113.7	0.955405	13.9981	1.19693	1.60986	3.08327	0.163511	2.84147	0.921575	976.257	25.7418	974.055	19.3137	969.966	24.4239	969.966	24.4239	100.649
MacDonnell B3-Spot 198	71.4043	13404	3.47291	13.991	0.98361	1.67712	3.13218	0.170256	2.97373	0.949412	1013.52	27.8897	999.89	19.9264	970.999	20.0768	970.999	20.0768	104.379
MacDonnell B3-Spot 130	117.772	16073.5	3.13283	13.9862	1.25603	1.63971	2.6354	0.166401	2.31684	0.879121	992.25	21.307	985.602	16.6237	971.696	25.6003	971.696	25.6003	102.115
MacDonnell B3-Spot 290	64.8207	42043.7	2.16453	13.9817	1.04773	1.60137	3.07496	0.162458	2.89096	0.940162	970.421	26.0451	970.745	19.2225	972.346	21.3613	972.346	21.3613	99.802
MacDonnell B3-Spot 276	126.32	9094.93	2.89991	13.9782	1.10557	1.69051	2.89119	0.171458	2.67146	0.924	1020.14	25.2057	1004.96	18.4475	972.906	22.5508	972.906	22.5508	104.855
MacDonnell B3-Spot 176	102.586	7593.13	2.83737	13.9615	1.32398	1.68854	2.77939	0.171054	2.44378	0.879253	1017.91	23.0112	1004.21	17.7263	975.296	26.9709	975.296	26.9709	104.37
MacDonnell B3-Spot 310	127.428	37542.4	1.48108	13.9471	0.973912	1.57195	2.59047	0.159079	2.40042	0.926636	951.656	21.2377	959.198	16.0776	977.398	19.848	977.398	19.848	97.3663
MacDonnell B3-Spot 23	129.422	13284.5	4.17741	13.9145	1.26646	1.56442	3.05308	0.157946	2.77801	0.909905	945.354	24.4273	956.218	18.9139	982.202	25.7904	982.202	25.7904	96.2485
MacDonnell B3-Spot 211	85.6249	32988.8	2.15737	13.9143	1.09566	1.6452	2.15138	0.166099	1.85148	0.860599	990.584	17.0008	987.709	13.5873	982.233	22.293	982.233	22.293	100.85
MacDonnell B3-Spot 246	88.8058	35293	2.49342	13.9045	0.894462	1.70474	3.03672	0.171989	2.902	0.955637	1023.06	27.4533	1010.31	19.4366	983.679	18.1924	983.679	18.1924	104.003
[truncated: 202 more rows]

[truncated: 6 more sheets: McGee Unit 1, PC Crapps, Poison Springs #1, Rizer #1, St Regis Paper Co B1, Superior McManus 1]
