# Supplementary material
Source: publisher figshare collection journal article supplement (https://gsapubs.figshare.com/articles/dataset/_/12542714)
Supplement: Supplementary file 1 [file 2]

Frederick, B.C., Blum, M.D., Snedden, J.W., and Fillon, R.H., 2020, Early Mesozoic synrift Eagle Mills Formation and coeval siliciclastic sources, sinks, and sediment routing, northern Gulf of Mexico basin: GSA Bulletin, <https://doi.org/10.1130/B35493.1>.

## Data Repository

**Table DR1.** Kolmogorov-Smirnov (K-S) P-value results assessed as a first pass to examine whether samples were not statistically distinguishable from parent populations with the same distribution (Gehrels, 2012; Saylor and Sundell, 2016). K-S test statistics were calculated using Microsoft Excel macros from the Arizona LaserChron's collection of online analytical tools (see <https://sites.google.com/a/laserchron.org/laserchron>).

**Table DR2.** Kolmogorov-Smirnov (K-S) D-value results assessed as a first pass to examine whether samples were not statistically distinguishable from parent populations with the same distribution (Gehrels, 2012; Saylor and Sundell, 2016). K-S test statistics were calculated using Microsoft Excel macros from the Arizona LaserChron's collection of online analytical tools (see <https://sites.google.com/a/laserchron.org/laserchron>).

**Table DR3.** The youngest distribution of DZ U-Pb ages within a sample were also interpreted to define the maximum depositional age (MDA) of that sample (Gehrels, 2014). MDAs that approximate true depositional age can prove problematic in pre-salt GoM samples. Cawood et al. (2012) suggested that DZ U-Pb samples dominated by older U-Pb ages may reflect underlying amagmatic basement history.

**Figure DR1.** Location of the Gulf Coast Magnetic Anomaly (purple line) on magnetic anomaly map of the study area, southern USA. Well name abbreviations defined in Table 1. DZ—detrital zircon.

**Figure DR2.** Map above shows regional basement crustal sources and the position of Laurentia, Gondwana, and Yucatán/Maya blocks in Pangea (based upon Pindell and Kennan, 2009; Lawver et al., 2014). Red box highlights regional source lithologies shown in the inset below. Basement ages are non-unique with historical geological constraint providing relative reconstruction of continental source terranes. Lithologies constrained by the prior works of Clift et al. (2018), Lawton et al. (2016), Fildani et al. (2016), Dickinson and Gehrels (2009a), Cordani et al. (2009), Cardona et al. (2010), and Gehrels et al. (2011). Am-Wich—Amarillo-Wichita Uplift.

**Figure DR3.** (A) Contribution of different source terrane populations to the composite detrital zircon (DZ) U-Pb record of the Eagle Mills Formation and associated coeval units (N = 16, n = 3154) collected during this study (USA). (B) Normalized kernel density estimate (KDE) plots for the composite DZ U-Pb record of the west, central, and eastern Gulf of Mexico (GoM), respectively, including published Late Triassic El Alamar River/Potosi Fan DZ samples (CH06-01, LB06-1, RC06-1, SM06-1) from Barboza-Gudiño et al. (2010).

**Figure DR4.** Trends in cumulative detrital zircon (DZ) age distributions west to east across the northern Gulf of Mexico, USA. Well name abbreviations defined in Table 1.

**Figure DR5.** Trends in cumulative detrital (DZ) zircon age distributions north to south across the northern Gulf of Mexico, USA. Well name abbreviations defined in Table 1.

**Figure DR6.** Detrital zircon (DZ) mix results with Alico Land Development Co. “daughter” mixture of tributary “parent” components of PC Crapps (47.6%), Hernasco (44.9%), St Regis (2.4%), and JT Stalvey (5.1%). Kernel density estimate (KDE) curves to explain South Florida Basin (USA) facies and paleodrainage. Resultant mean cross correlation indicates an excellent 0.961 resultant model fit. PDPs—Probability Density Plots; CDFs—Cumulative Distribution Functions.

**Figure DR7.** Detrital zircon (DZ) mix results with MacDonnell B3 “daughter” mixture of tributary “parent” components of Amoco Stumberg (66.6%), Crossett Lumber (11.4%), Superior McManus (7.7%), LV Ray (1.4%), GD Royston (5%), Poison Springs (3.3%), SM06-1 (3%), and RC06-31 (1.7%). Kernel density estimate (KDE) curves to identify paleodrainage relationships between regional wells. Resultant good mean cross correlation coefficient model fit of 0.825. PDPs—Probability Density Plots; CDFs—Cumulative Distribution Functions.

**Figure DR8.** Detrital zircon (DZ) mix results of Potosi Fan “daughter” mixtures (RC06-31 and CH06-1) of tributary “parent” components. Kernel density estimate (KDE) curves identify paleodrainage relationships between regional wells. El Alamar paleoriver sample LB06-1 identified by Barboza-Gudiño et al. (2010) with >70% Permian–Triassic DZ age distribution implies significant secondary influx from proximal East Mexico Arc magmatic sources. Resultant good mean cross correlation coefficient model fit of  $0.805 \pm 0.003$ . PDPs—Probability Density Plots; CDFs—Cumulative Distribution Functions.

**Figure DR9.** Detrital zircon (DZ) mix results for St Regis Paper Co sample (daughter) with PC Crapps, JT Stalvey, Cecil Pate, and Rizer 1 samples as parent modeling inputs. The DZmix modeling algorithm quantifies source mixing proportions through a combination of inverse Monte Carlo modeling and optimized forward modeling (Sundell and Saylor, 2017). PDPs—Probability Density Plots; CDFs—Cumulative Distribution Functions.

**Figure DR10.** Detrital zircon (DZ) mix results for Crossett Lumber E1 sample (daughter) with Poison Springs 1, GD Royston, and McGee Unit samples as parent modeling inputs. The DZmix modeling algorithm quantifies source mixing proportions through a combination of inverse Monte Carlo modeling and optimized forward modeling (Sundell and Saylor, 2017). PDPs—Probability Density Plots; CDFs—Cumulative Distribution Functions.

**Figure DR11.** Detrital zircon (DZ) mix results for GD Royston sample (daughter) with Poison Springs 1, Crossett Lumber E1, and McGee Unit samples as parent modeling inputs. The DZmix modeling algorithm quantifies source mixing proportions through a combination of inverse Monte Carlo modeling and optimized forward modeling (Sundell and Saylor, 2017). PDPs—Probability Density Plots; CDFs—Cumulative Distribution Functions.

**Figure DR12.** Detrital zircon (DZ) mix results for McGee Unit sample (daughter) with Poison Springs 1, Crossett Lumber E1, and GD Royston samples as parent modeling inputs. The DZmix modeling algorithm quantifies source mixing proportions through a combination of inverse Monte Carlo modeling and optimized forward modeling (Sundell and Saylor, 2017). PDPs—Probability Density Plots; CDFs—Cumulative Distribution Functions.



## REFERENCES CITED

- Cawood, P.A., Hawkesworth, C.J., and Dhuime, B., 2012, Detrital zircon record and tectonic setting: *Geology*, v. 40, p. 875–878, <https://doi.org/10.1130/G32945.1>.
- Clift, P.D., Heinrich, P., Dunn, D., Jacobus, A., and Blusztajn, J., 2018, The Sabine block, Gulf of Mexico: Promontory on the North American margin?: *Geology*, v. 46, p. 15–18, <https://doi.org/10.1130/G39592.1>.
- Dickinson, W.R., and Gehrels, G.E., 2009a, U-Pb ages of detrital zircons in Jurassic eolian and associated sandstones of the Colorado plateau: Evidence for transcontinental dispersal and intraregional recycling of sediment: *Geological Society of America Bulletin*, v. 121, p. 408–433, <https://doi.org/10.1130/B26406.1>.
- Fildani, A., McKay, M.P., Stockli, D., Clark, J., Dykstra, M.L., Stockli, L., and Hessler, A.M., 2016, The ancestral Mississippi drainage archived in the late Wisconsin Mississippi deep-sea fan: *Geology*, v. 44, p. 479–482, <https://doi.org/10.1130/G37657.1>.
- Gehrels, G.E., 2012, Detrital Zircon U-Pb Geochronology : Current Methods and New Opportunities, in *Tectonics of Sedimentary Basins: Recent Advances*, John Wiley and Sons, 2012, p. 45–62, <https://doi.org/10.1002/9781444347166.ch2>.
- Gehrels, G., 2014, Detrital Zircon U-Pb Geochronology Applied to Tectonics: *Annual Review of Earth and Planetary Sciences*, v. 42, p. 127–149, <https://doi.org/10.1146/annurev-earth-050212-124012>.
- Gehrels, G.E., Blakey, R., Karlstrom, K.E., Timmons, J.M., Dickinson, B., and Pecha, M., 2011, Detrital zircon U-Pb geochronology of Paleozoic strata in the Grand Canyon, Arizona: *Lithosphere*, v. 3, p. 183–200, <https://doi.org/10.1130/L121.1>.
- Lawver, L.A., Dalziel, I.W.D., Norton, I.O., Gahagan, L.M., and Davis, J., 2014, The PLATES 2014 Atlas of Plate Reconstructions (550 Ma to Present Day), PLATES Progress Report No. 374-0215: Austin, Texas, USA, University of Texas Institute for Geophysics, Technical Report No. 202, 220 p.
- Pindell, J.L., and Kennan, L., 2009, Tectonic evolution of the Gulf of Mexico, Caribbean and northern South America in the mantle reference frame: An update, *in* James, K.H., Lorente, M.A., and Pindell, J.L., eds., *The Origin and Evolution of the Caribbean Plate: Geological Society of London Special Publication 328*, p. 1–55, <https://doi.org/10.1144/SP328.1>.
- Saylor, J.E., and Sundell, K.E., 2016, Quantifying comparison of large detrital geochronology data sets: *Geosphere*, v. 12, p. 203–220, <https://doi.org/10.1130/GES01237.1>.
- Sundell, K.E., and Saylor, J.E., 2017, Unmixing detrital geochronology age distributions: *Geochemistry Geophysics Geosystems*, v. 18, p. 2872–2886, <https://doi.org/10.1002/2016GC006774>.

Table 1

## K-S P-values using error in the CDF

|                     | MacDonnell B3 | McGee Unit 1 | Creel 1      | Crossett Lumber E1 | GD Royston | Hernasco 1 | JT Stalvey | PC Crapps | Poison Springs 1 | St Regis Paper Co | Superior McManus | Rizer 1 | LV Ray Gas Unit 1-2 | Alico Land Dev Co | Cecil Pate 1 |
|---------------------|---------------|--------------|--------------|--------------------|------------|------------|------------|-----------|------------------|-------------------|------------------|---------|---------------------|-------------------|--------------|
| MacDonnell B3       |               | 0.000        | <b>0.124</b> | 0.000              | 0.000      | 0.000      | 0.000      | 0.000     | 0.000            | 0.000             | 0.000            | 0.000   | 0.000               | 0.000             | 0.000        |
| McGee Unit 1        | 0.000         |              | 0.000        | <b>0.175</b>       | 0.000      | 0.000      | 0.000      | 0.000     | <b>0.057</b>     | 0.000             | 0.000            | 0.000   | 0.000               | 0.000             | 0.000        |
| Creel 1             | <b>0.124</b>  | 0.000        |              | 0.001              | 0.000      | 0.000      | 0.000      | 0.000     | 0.000            | 0.000             | 0.000            | 0.000   | 0.000               | 0.000             | 0.000        |
| Crossett Lumber E1  | 0.000         | <b>0.175</b> | 0.001        |                    | 0.000      | 0.000      | 0.000      | 0.000     | 0.016            | 0.000             | 0.000            | 0.000   | 0.000               | 0.000             | 0.000        |
| GD Royston          | 0.000         | 0.000        | 0.000        | 0.000              |            | 0.000      | 0.000      | 0.000     | 0.018            | 0.000             | 0.000            | 0.000   | 0.000               | 0.000             | 0.000        |
| Hernasco 1          | 0.000         | 0.000        | 0.000        | 0.000              | 0.000      |            | 0.000      | 0.000     | 0.000            | 0.000             | 0.000            | 0.000   | 0.000               | 0.000             | 0.000        |
| JT Stalvey          | 0.000         | 0.000        | 0.000        | 0.000              | 0.000      | 0.000      |            | 0.044     | 0.000            | 0.007             | 0.000            | 0.000   | 0.000               | 0.000             | 0.000        |
| PC Crapps           | 0.000         | 0.000        | 0.000        | 0.000              | 0.000      | 0.000      | 0.044      |           | 0.000            | 0.001             | 0.000            | 0.000   | 0.000               | 0.000             | 0.000        |
| Poison Springs 1    | 0.000         | <b>0.057</b> | 0.000        | 0.016              | 0.018      | 0.000      | 0.000      | 0.000     |                  | 0.000             | 0.000            | 0.000   | 0.000               | 0.000             | 0.000        |
| St Regis Paper Co   | 0.000         | 0.000        | 0.000        | 0.000              | 0.000      | 0.000      | 0.007      | 0.001     | 0.000            |                   | 0.000            | 0.000   | 0.000               | 0.000             | 0.000        |
| Superior McManus    | 0.000         | 0.000        | 0.000        | 0.000              | 0.000      | 0.000      | 0.000      | 0.000     | 0.000            | 0.000             |                  | 0.000   | 0.000               | 0.000             | 0.000        |
| Rizer 1             | 0.000         | 0.000        | 0.000        | 0.000              | 0.000      | 0.000      | 0.000      | 0.000     | 0.000            | 0.000             | 0.000            |         | 0.000               | 0.000             | 0.000        |
| LV Ray Gas Unit 1-2 | 0.000         | 0.000        | 0.000        | 0.000              | 0.000      | 0.000      | 0.000      | 0.000     | 0.000            | 0.000             | 0.000            | 0.000   |                     | 0.000             | 0.000        |
| Alico Land Dev Co   | 0.000         | 0.000        | 0.000        | 0.000              | 0.000      | 0.000      | 0.000      | 0.000     | 0.000            | 0.000             | 0.000            | 0.000   | 0.000               |                   | 0.000        |
| Cecil Pate 1        | 0.000         | 0.000        | 0.000        | 0.000              | 0.000      | 0.000      | 0.000      | 0.000     | 0.000            | 0.000             | 0.000            | 0.000   | 0.000               | 0.000             |              |

## K-S P-values for no error

|                     | MacDonnell B3 | McGee Unit 1 | Creel 1      | Crossett Lumber E1 | GD Royston | Hernasco 1 | JT Stalvey | PC Crapps | Poison Springs 1 | St Regis Paper Co | Superior McManus | Rizer 1 | LV Ray Gas Unit 1-2 | Alico Land Dev Co | Cecil Pate 1 |
|---------------------|---------------|--------------|--------------|--------------------|------------|------------|------------|-----------|------------------|-------------------|------------------|---------|---------------------|-------------------|--------------|
| MacDonnell B3       |               | 0.000        | <b>0.042</b> | 0.000              | 0.000      | 0.000      | 0.000      | 0.000     | 0.000            | 0.000             | 0.000            | 0.000   | 0.000               | 0.000             | 0.000        |
| McGee Unit 1        | 0.000         |              | 0.000        | 0.075              | 0.000      | 0.000      | 0.000      | 0.000     | <b>0.044</b>     | 0.000             | 0.000            | 0.000   | 0.000               | 0.000             | 0.000        |
| Creel 1             | <b>0.042</b>  | 0.000        |              | 0.001              | 0.000      | 0.000      | 0.000      | 0.000     | 0.000            | 0.000             | 0.000            | 0.000   | 0.000               | 0.000             | 0.000        |
| Crossett Lumber E1  | 0.000         | 0.075        | 0.001        |                    | 0.000      | 0.000      | 0.000      | 0.000     | 0.008            | 0.000             | 0.000            | 0.000   | 0.000               | 0.000             | 0.000        |
| GD Royston          | 0.000         | 0.000        | 0.000        | 0.000              |            | 0.000      | 0.000      | 0.000     | 0.009            | 0.000             | 0.000            | 0.000   | 0.000               | 0.000             | 0.000        |
| Hernasco 1          | 0.000         | 0.000        | 0.000        | 0.000              | 0.000      |            | 0.000      | 0.000     | 0.000            | 0.000             | 0.000            | 0.000   | 0.000               | 0.000             | 0.000        |
| JT Stalvey          | 0.000         | 0.000        | 0.000        | 0.000              | 0.000      | 0.000      |            | 0.013     | 0.000            | 0.004             | 0.000            | 0.000   | 0.000               | 0.000             | 0.000        |
| PC Crapps           | 0.000         | 0.000        | 0.000        | 0.000              | 0.000      | 0.000      | 0.013      |           | 0.000            | 0.001             | 0.000            | 0.000   | 0.000               | 0.000             | 0.000        |
| Poison Springs 1    | 0.000         | <b>0.044</b> | 0.000        | 0.008              | 0.009      | 0.000      | 0.000      | 0.000     |                  | 0.000             | 0.000            | 0.000   | 0.000               | 0.000             | 0.000        |
| St Regis Paper Co   | 0.000         | 0.000        | 0.000        | 0.000              | 0.000      | 0.000      | 0.004      | 0.001     | 0.000            |                   | 0.000            | 0.000   | 0.000               | 0.000             | 0.000        |
| Superior McManus    | 0.000         | 0.000        | 0.000        | 0.000              | 0.000      | 0.000      | 0.000      | 0.000     | 0.000            | 0.000             |                  | 0.000   | 0.000               | 0.000             | 0.000        |
| Rizer 1             | 0.000         | 0.000        | 0.000        | 0.000              | 0.000      | 0.000      | 0.000      | 0.000     | 0.000            | 0.000             | 0.000            |         | 0.000               | 0.000             | 0.000        |
| LV Ray Gas Unit 1-2 | 0.000         | 0.000        | 0.000        | 0.000              | 0.000      | 0.000      | 0.000      | 0.000     | 0.000            | 0.000             | 0.000            | 0.000   |                     | 0.000             | 0.000        |
| Alico Land Dev Co   | 0.000         | 0.000        | 0.000        | 0.000              | 0.000      | 0.000      | 0.000      | 0.000     | 0.000            | 0.000             | 0.000            | 0.000   | 0.000               |                   | 0.000        |
| Cecil Pate 1        | 0.000         | 0.000        | 0.000        | 0.000              | 0.000      | 0.000      | 0.000      | 0.000     | 0.000            | 0.000             | 0.000            | 0.000   | 0.000               | 0.000             |              |

## Average K-S P-values using Monte-Carlo

|                     | MacDonnell B3 | McGee Unit 1 | Creel 1      | Crossett Lumber E1 | GD Royston | Hernasco 1 | JT Stalvey | PC Crapps | Poison Springs 1 | St Regis Paper Co | Superior McManus | Rizer 1 | LV Ray Gas Unit 1-2 | Alico Land Dev Co | Cecil Pate 1 |
|---------------------|---------------|--------------|--------------|--------------------|------------|------------|------------|-----------|------------------|-------------------|------------------|---------|---------------------|-------------------|--------------|
| MacDonnell B3       |               | 0.000        | <b>0.060</b> | 0.000              | 0.000      | 0.000      | 0.000      | 0.000     | 0.000            | 0.000             | 0.000            | 0.000   | 0.000               | 0.000             | 0.000        |
| McGee Unit 1        | 0.000         |              | 0.000        | <b>0.075</b>       | 0.000      | 0.000      | 0.000      | 0.000     | <b>0.044</b>     | 0.000             | 0.000            | 0.000   | 0.000               | 0.000             | 0.000        |
| Creel 1             | <b>0.060</b>  | 0.000        |              | 0.001              | 0.000      | 0.000      | 0.000      | 0.000     | 0.000            | 0.000             | 0.000            | 0.000   | 0.000               | 0.000             | 0.000        |
| Crossett Lumber E1  | 0.000         | <b>0.075</b> | 0.001        |                    | 0.000      | 0.000      | 0.000      | 0.000     | 0.009            | 0.000             | 0.000            | 0.000   | 0.000               | 0.000             | 0.000        |
| GD Royston          | 0.000         | 0.000        | 0.000        | 0.000              |            | 0.000      | 0.000      | 0.000     | 0.009            | 0.000             | 0.000            | 0.000   | 0.000               | 0.000             | 0.000        |
| Hernasco 1          | 0.000         | 0.000        | 0.000        | 0.000              | 0.000      |            | 0.000      | 0.000     | 0.000            | 0.000             | 0.000            | 0.000   | 0.000               | 0.000             | 0.000        |
| JT Stalvey          | 0.000         | 0.000        | 0.000        | 0.000              | 0.000      | 0.000      |            | 0.022     | 0.000            | 0.004             | 0.000            | 0.000   | 0.000               | 0.000             | 0.000        |
| PC Crapps           | 0.000         | 0.000        | 0.000        | 0.000              | 0.000      | 0.000      | 0.022      |           | 0.000            | 0.001             | 0.000            | 0.000   | 0.000               | 0.000             | 0.000        |
| Poison Springs 1    | 0.000         | <b>0.044</b> | 0.000        | 0.009              | 0.009      | 0.000      | 0.000      | 0.000     |                  | 0.000             | 0.000            | 0.000   | 0.000               | 0.000             | 0.000        |
| St Regis Paper Co   | 0.000         | 0.000        | 0.000        | 0.000              | 0.000      | 0.000      | 0.004      | 0.001     | 0.000            |                   | 0.000            | 0.000   | 0.000               | 0.000             | 0.000        |
| Superior McManus    | 0.000         | 0.000        | 0.000        | 0.000              | 0.000      | 0.000      | 0.000      | 0.000     | 0.000            | 0.000             |                  | 0.000   | 0.000               | 0.000             | 0.000        |
| Rizer 1             | 0.000         | 0.000        | 0.000        | 0.000              | 0.000      | 0.000      | 0.000      | 0.000     | 0.000            | 0.000             | 0.000            |         | 0.000               | 0.000             | 0.000        |
| LV Ray Gas Unit 1-2 | 0.000         | 0.000        | 0.000        | 0.000              | 0.000      | 0.000      | 0.000      | 0.000     | 0.000            | 0.000             | 0.000            | 0.000   |                     | 0.000             | 0.000        |
| Alico Land Dev Co   | 0.000         | 0.000        | 0.000        | 0.000              | 0.000      | 0.000      | 0.000      | 0.000     | 0.000            | 0.000             | 0.000            | 0.000   | 0.000               |                   | 0.000        |
| Cecil Pate 1        | 0.000         | 0.000        | 0.000        | 0.000              | 0.000      | 0.000      | 0.000      | 0.000     | 0.000            | 0.000             | 0.000            | 0.000   | 0.000               | 0.000             |              |

Supplemental Table 1: Kolmogorov-Smirnov (K-S) P-value results assessed as a first pass to examine whether samples were not statistically distinguishable from parent populations with the same distribution (Gehrels, 2012; Saylor and Sundell, 2016). K-S test statistics were calculated using Microsoft Excel macros from the Arizona LaserChron's collection of online analytical tools (see <https://sites.google.com/a/laserchron.org/laserchron>).

Table 2

| D-values using error in the CDF             |               |              |         |                    |            |            |            |           |                  |                   |                  |         |                     |                   |              |
|---------------------------------------------|---------------|--------------|---------|--------------------|------------|------------|------------|-----------|------------------|-------------------|------------------|---------|---------------------|-------------------|--------------|
|                                             | MacDonnell B3 | McGee Unit 1 | Creel 1 | Crossett Lumber E1 | GD Royston | Hernasco 1 | JT Stalvey | PC Crapps | Poison Springs 1 | St Regis Paper Co | Superior McManus | Rizer 1 | LV Ray Gas Unit 1-2 | Alico Land Dev Co | Cecil Pate 1 |
| MacDonnell B3                               |               | 0.254        | 0.108   | 0.242              | 0.326      | 0.706      | 0.354      | 0.365     | 0.232            | 0.492             | 0.259            | 0.641   | 0.268               | 0.563             | 0.467        |
| McGee Unit 1                                | 0.254         |              | 0.211   | 0.118              | 0.230      | 0.935      | 0.585      | 0.596     | 0.122            | 0.726             | 0.492            | 0.876   | 0.499               | 0.794             | 0.698        |
| Creel 1                                     | 0.108         | 0.211        |         | 0.221              | 0.340      | 0.738      | 0.378      | 0.390     | 0.234            | 0.530             | 0.301            | 0.680   | 0.292               | 0.587             | 0.496        |
| Crossett Lumber E1                          | 0.242         | 0.118        | 0.221   |                    | 0.271      | 0.946      | 0.595      | 0.607     | 0.168            | 0.733             | 0.500            | 0.882   | 0.510               | 0.804             | 0.708        |
| GD Royston                                  | 0.326         | 0.230        | 0.340   | 0.271              |            | 0.781      | 0.402      | 0.424     | 0.147            | 0.552             | 0.324            | 0.713   | 0.318               | 0.618             | 0.529        |
| Hernasco 1                                  | 0.706         | 0.935        | 0.738   | 0.946              | 0.781      |            | 0.631      | 0.549     | 0.829            | 0.520             | 0.473            | 0.581   | 0.765               | 0.287             | 0.552        |
| JT Stalvey                                  | 0.354         | 0.585        | 0.378   | 0.595              | 0.402      | 0.631      |            | 0.138     | 0.464            | 0.208             | 0.257            | 0.475   | 0.318               | 0.397             | 0.452        |
| PC Crapps                                   | 0.365         | 0.596        | 0.390   | 0.607              | 0.424      | 0.549      | 0.138      |           | 0.475            | 0.242             | 0.353            | 0.584   | 0.384               | 0.292             | 0.555        |
| Poison Springs 1                            | 0.232         | 0.122        | 0.234   | 0.168              | 0.147      | 0.829      | 0.464      | 0.475     |                  | 0.610             | 0.375            | 0.760   | 0.379               | 0.673             | 0.578        |
| St Regis Paper Co                           | 0.492         | 0.726        | 0.530   | 0.733              | 0.552      | 0.520      | 0.208      | 0.242     | 0.610            |                   | 0.256            | 0.491   | 0.483               | 0.288             | 0.418        |
| Superior McManus                            | 0.259         | 0.492        | 0.301   | 0.500              | 0.324      | 0.473      | 0.257      | 0.353     | 0.375            | 0.256             |                  | 0.405   | 0.314               | 0.314             | 0.237        |
| Rizer 1                                     | 0.641         | 0.876        | 0.680   | 0.882              | 0.713      | 0.581      | 0.475      | 0.584     | 0.760            | 0.491             | 0.405            |         | 0.664               | 0.550             | 0.335        |
| LV Ray Gas Unit 1-2                         | 0.268         | 0.499        | 0.292   | 0.510              | 0.318      | 0.765      | 0.318      | 0.384     | 0.379            | 0.483             | 0.314            | 0.664   |                     | 0.588             | 0.527        |
| Alico Land Dev Co                           | 0.563         | 0.794        | 0.587   | 0.804              | 0.618      | 0.287      | 0.397      | 0.292     | 0.673            | 0.288             | 0.314            | 0.550   | 0.588               |                   | 0.521        |
| Cecil Pate 1                                | 0.467         | 0.698        | 0.496   | 0.708              | 0.529      | 0.552      | 0.452      | 0.555     | 0.578            | 0.418             | 0.237            | 0.335   | 0.527               | 0.521             |              |
| D-values for no error                       |               |              |         |                    |            |            |            |           |                  |                   |                  |         |                     |                   |              |
|                                             | MacDonnell B3 | McGee Unit 1 | Creel 1 | Crossett Lumber E1 | GD Royston | Hernasco 1 | JT Stalvey | PC Crapps | Poison Springs 1 | St Regis Paper Co | Superior McManus | Rizer 1 | LV Ray Gas Unit 1-2 | Alico Land Dev Co | Cecil Pate 1 |
| MacDonnell B3                               |               | 0.282        | 0.128   | 0.249              | 0.334      | 0.711      | 0.356      | 0.366     | 0.267            | 0.492             | 0.268            | 0.641   | 0.270               | 0.563             | 0.467        |
| McGee Unit 1                                | 0.282         |              | 0.211   | 0.137              | 0.241      | 0.935      | 0.586      | 0.596     | 0.126            | 0.726             | 0.500            | 0.876   | 0.501               | 0.794             | 0.697        |
| Creel 1                                     | 0.128         | 0.211        |         | 0.221              | 0.348      | 0.745      | 0.386      | 0.390     | 0.237            | 0.531             | 0.316            | 0.680   | 0.298               | 0.588             | 0.501        |
| Crossett Lumber E1                          | 0.249         | 0.137        | 0.221   |                    | 0.279      | 0.946      | 0.597      | 0.607     | 0.181            | 0.733             | 0.508            | 0.883   | 0.512               | 0.804             | 0.708        |
| GD Royston                                  | 0.334         | 0.241        | 0.348   | 0.279              |            | 0.782      | 0.407      | 0.426     | 0.158            | 0.557             | 0.337            | 0.718   | 0.322               | 0.619             | 0.533        |
| Hernasco 1                                  | 0.711         | 0.935        | 0.745   | 0.946              | 0.782      |            | 0.648      | 0.583     | 0.832            | 0.536             | 0.487            | 0.586   | 0.772               | 0.323             | 0.557        |
| JT Stalvey                                  | 0.356         | 0.586        | 0.386   | 0.597              | 0.407      | 0.648      |            | 0.158     | 0.465            | 0.219             | 0.265            | 0.478   | 0.334               | 0.416             | 0.465        |
| PC Crapps                                   | 0.366         | 0.596        | 0.390   | 0.607              | 0.426      | 0.583      | 0.158      |           | 0.475            | 0.242             | 0.361            | 0.586   | 0.409               | 0.307             | 0.557        |
| Poison Springs 1                            | 0.267         | 0.126        | 0.237   | 0.181              | 0.158      | 0.832      | 0.465      | 0.475     |                  | 0.610             | 0.388            | 0.761   | 0.380               | 0.673             | 0.580        |
| St Regis Paper Co                           | 0.492         | 0.726        | 0.531   | 0.733              | 0.557      | 0.536      | 0.219      | 0.242     | 0.610            |                   | 0.256            | 0.493   | 0.509               | 0.302             | 0.425        |
| Superior McManus                            | 0.268         | 0.500        | 0.316   | 0.508              | 0.337      | 0.487      | 0.265      | 0.361     | 0.388            | 0.256             |                  | 0.406   | 0.325               | 0.318             | 0.246        |
| Rizer 1                                     | 0.641         | 0.876        | 0.680   | 0.883              | 0.718      | 0.586      | 0.478      | 0.586     | 0.761            | 0.493             | 0.406            |         | 0.694               | 0.553             | 0.338        |
| LV Ray Gas Unit 1-2                         | 0.270         | 0.501        | 0.298   | 0.512              | 0.322      | 0.772      | 0.334      | 0.409     | 0.380            | 0.509             | 0.325            | 0.694   |                     | 0.602             | 0.534        |
| Alico Land Dev Co                           | 0.563         | 0.794        | 0.588   | 0.804              | 0.619      | 0.323      | 0.416      | 0.307     | 0.673            | 0.302             | 0.318            | 0.553   | 0.602               |                   | 0.523        |
| Cecil Pate 1                                | 0.467         | 0.697        | 0.501   | 0.708              | 0.533      | 0.557      | 0.465      | 0.557     | 0.580            | 0.425             | 0.246            | 0.338   | 0.534               | 0.523             |              |
| Two std devs. of P-values using Monte-Carlo |               |              |         |                    |            |            |            |           |                  |                   |                  |         |                     |                   |              |
|                                             | MacDonnell B3 | McGee Unit 1 | Creel 1 | Crossett Lumber E1 | GD Royston | Hernasco 1 | JT Stalvey | PC Crapps | Poison Springs 1 | St Regis Paper Co | Superior McManus | Rizer 1 | LV Ray Gas Unit 1-2 | Alico Land Dev Co | Cecil Pate 1 |
| MacDonnell B3                               |               | 0.000        | 0.058   | 0.000              | 0.000      | 0.000      | 0.000      | 0.000     | 0.000            | 0.000             | 0.000            | 0.000   | 0.000               | 0.000             | 0.000        |
| McGee Unit 1                                | 0.000         |              | 0.000   | 0.062              | 0.000      | 0.000      | 0.000      | 0.000     | 0.018            | 0.000             | 0.000            | 0.000   | 0.000               | 0.000             | 0.000        |
| Creel 1                                     | 0.058         | 0.000        |         | 0.000              | 0.000      | 0.000      | 0.000      | 0.000     | 0.000            | 0.000             | 0.000            | 0.000   | 0.000               | 0.000             | 0.000        |
| Crossett Lumber E1                          | 0.000         | 0.062        | 0.000   |                    | 0.000      | 0.000      | 0.000      | 0.000     | 0.006            | 0.000             | 0.000            | 0.000   | 0.000               | 0.000             | 0.000        |
| GD Royston                                  | 0.000         | 0.000        | 0.000   | 0.000              |            | 0.000      | 0.000      | 0.000     | 0.006            | 0.000             | 0.000            | 0.000   | 0.000               | 0.000             | 0.000        |
| Hernasco 1                                  | 0.000         | 0.000        | 0.000   | 0.000              | 0.000      |            | 0.000      | 0.000     | 0.000            | 0.000             | 0.000            | 0.000   | 0.000               | 0.000             | 0.000        |
| JT Stalvey                                  | 0.000         | 0.000        | 0.000   | 0.000              | 0.000      | 0.000      |            | 0.028     | 0.000            | 0.003             | 0.000            | 0.000   | 0.000               | 0.000             | 0.000        |
| PC Crapps                                   | 0.000         | 0.000        | 0.000   | 0.000              | 0.000      | 0.000      | 0.028      |           | 0.000            | 0.000             | 0.000            | 0.000   | 0.000               | 0.000             | 0.000        |
| Poison Springs 1                            | 0.000         | 0.018        | 0.000   | 0.006              | 0.006      | 0.000      | 0.000      | 0.000     |                  | 0.000             | 0.000            | 0.000   | 0.000               | 0.000             | 0.000        |
| St Regis Paper Co                           | 0.000         | 0.000        | 0.000   | 0.000              | 0.000      | 0.000      | 0.003      | 0.000     | 0.000            |                   | 0.000            | 0.000   | 0.000               | 0.000             | 0.000        |
| Superior McManus                            | 0.000         | 0.000        | 0.000   | 0.000              | 0.000      | 0.000      | 0.000      | 0.000     | 0.000            | 0.000             |                  | 0.000   | 0.000               | 0.000             | 0.000        |
| Rizer 1                                     | 0.000         | 0.000        | 0.000   | 0.000              | 0.000      | 0.000      | 0.000      | 0.000     | 0.000            | 0.000             | 0.000            |         | 0.000               | 0.000             | 0.000        |
| LV Ray Gas Unit 1-2                         | 0.000         | 0.000        | 0.000   | 0.000              | 0.000      | 0.000      | 0.000      | 0.000     | 0.000            | 0.000             | 0.000            | 0.000   |                     | 0.000             | 0.000        |
| Alico Land Dev Co                           | 0.000         | 0.000        | 0.000   | 0.000              | 0.000      | 0.000      | 0.000      | 0.000     | 0.000            | 0.000             | 0.000            | 0.000   | 0.000               |                   | 0.000        |
| Cecil Pate 1                                | 0.000         | 0.000        | 0.000   | 0.000              | 0.000      | 0.000      | 0.000      | 0.000     | 0.000            | 0.000             | 0.000            | 0.000   | 0.000               | 0.000             |              |

Supplemental Table 2: Kolmogorov-Smirnov (K-S) D-value results assessed as a first pass to examine whether sam-  
ples were not statistically distinguishable from parent populations with the same distribution (Gehrels, 2012; Saylor  
and Sundell, 2016). K-S test statistics were calculated using Microsoft Excel macros from the Arizona LaserChron’s  
collection of online analytical tools (see <https://sites.google.com/a/laserchron.org/laserchron>).

**Table 3**

| Well ID                | Sample Depth (ft) | County/State  | Youngest Grain (Ma) | MDA (Ma) | MDA err (Ma) | Raw DZ ct | QC DZ ct | DZ % Pb-loss |
|------------------------|-------------------|---------------|---------------------|----------|--------------|-----------|----------|--------------|
| Alico Land Dev Co 19-2 | 15640-16000       | Hendry/FL     | 198.1               | 201.5    | 2.44         | 234       | 234      | 0            |
| Amoco Stumberg*        | 19715-19743       | Dimmit/TX     | 293.3               | 339.0    | 3.9          | 293       | 241      | 17.7         |
| Cecil Pate #1*         | 4250-4520         | Crisp/GA      | 199.1               | 271.7    | 2.53         | 262       | 248      | 5.34         |
| Creel #1               | 4406-4734         | Barbour/AL    | 304.2               | 326.7    | 4            | 281       | 272      | 3.2          |
| Crossett Lumber E1     | 7870-9590         | Ashley/AR     | 97.7                | NA       | NA           | 196       | 191      | 2.55         |
| GD Royston #1*         | 3800-5200         | Hempstead/AR  | 338.8               | 411.1    | 10.75        | 296       | 293      | 1.01         |
| Hernasco #1            | 7700-8470         | Hernando/FL   | 518                 | 554.7    | 6.21         | 257       | 256      | 0.38         |
| JT Stalvey Jr #1       | 5200-5480         | Lowndes/GA    | 240.4               | 267.1    | 2.6          | 229       | 224      | 2.23         |
| LV Ray Gas Unit 1-2*   | 13700-13756       | Upshur/TX     | 403.1               | 554      | 13.2         | 161       | 155      | 1.88         |
| MacDonnell B3          | 10677-10691       | Cass/TX       | 301.2               | 312.1    | 8.03         | 299       | 299      | 0            |
| McGee Unit #1          | 14947-14953       | Scott/MS      | 428                 | 462.6    | 10.8         | 293       | 290      | 1.03         |
| PC Crapps #1           | 6500-8380         | Lafayette/FL  | 519.1               | 539.9    | 1.44         | 245       | 243      | 0.82         |
| Poison Springs #1*     | 5600-7200         | Ouachita/AR   | 101.66              | 409.8    | 4.04         | 286       | 279      | 2.44         |
| Rizer #1*              | 6006-6008         | Colleton/SC   | 80.7                | 283.6    | 7.37         | 302       | 293      | 3.07         |
| St Regis Paper Co B1*  | 16140-16920       | Santa Rosa/FL | 257.4               | 412.2    | 4.72         | 116       | 113      | 2.58         |
| Superior McManus DC #1 | 20400-21644       | Gonzales/TX   | 231.8               | 251.1    | 3.47         | 249       | 247      | 0.81         |

**Notes:**

\* - More than 40 Ma between MDA and youngest grain

Supplemental Table 3: The youngest distribution of DZ U-Pb ages within a sample were also interpreted to define the maximum depositional age (MDA) of that sample (Gehrels, 2014). MDAs that approximate true depositional age can prove problematic in pre-salt GoM samples. Cawood et al. (2012) suggested that DZ U-Pb samples dominated by older U-Pb ages may reflect underlying amagmatic basement history.

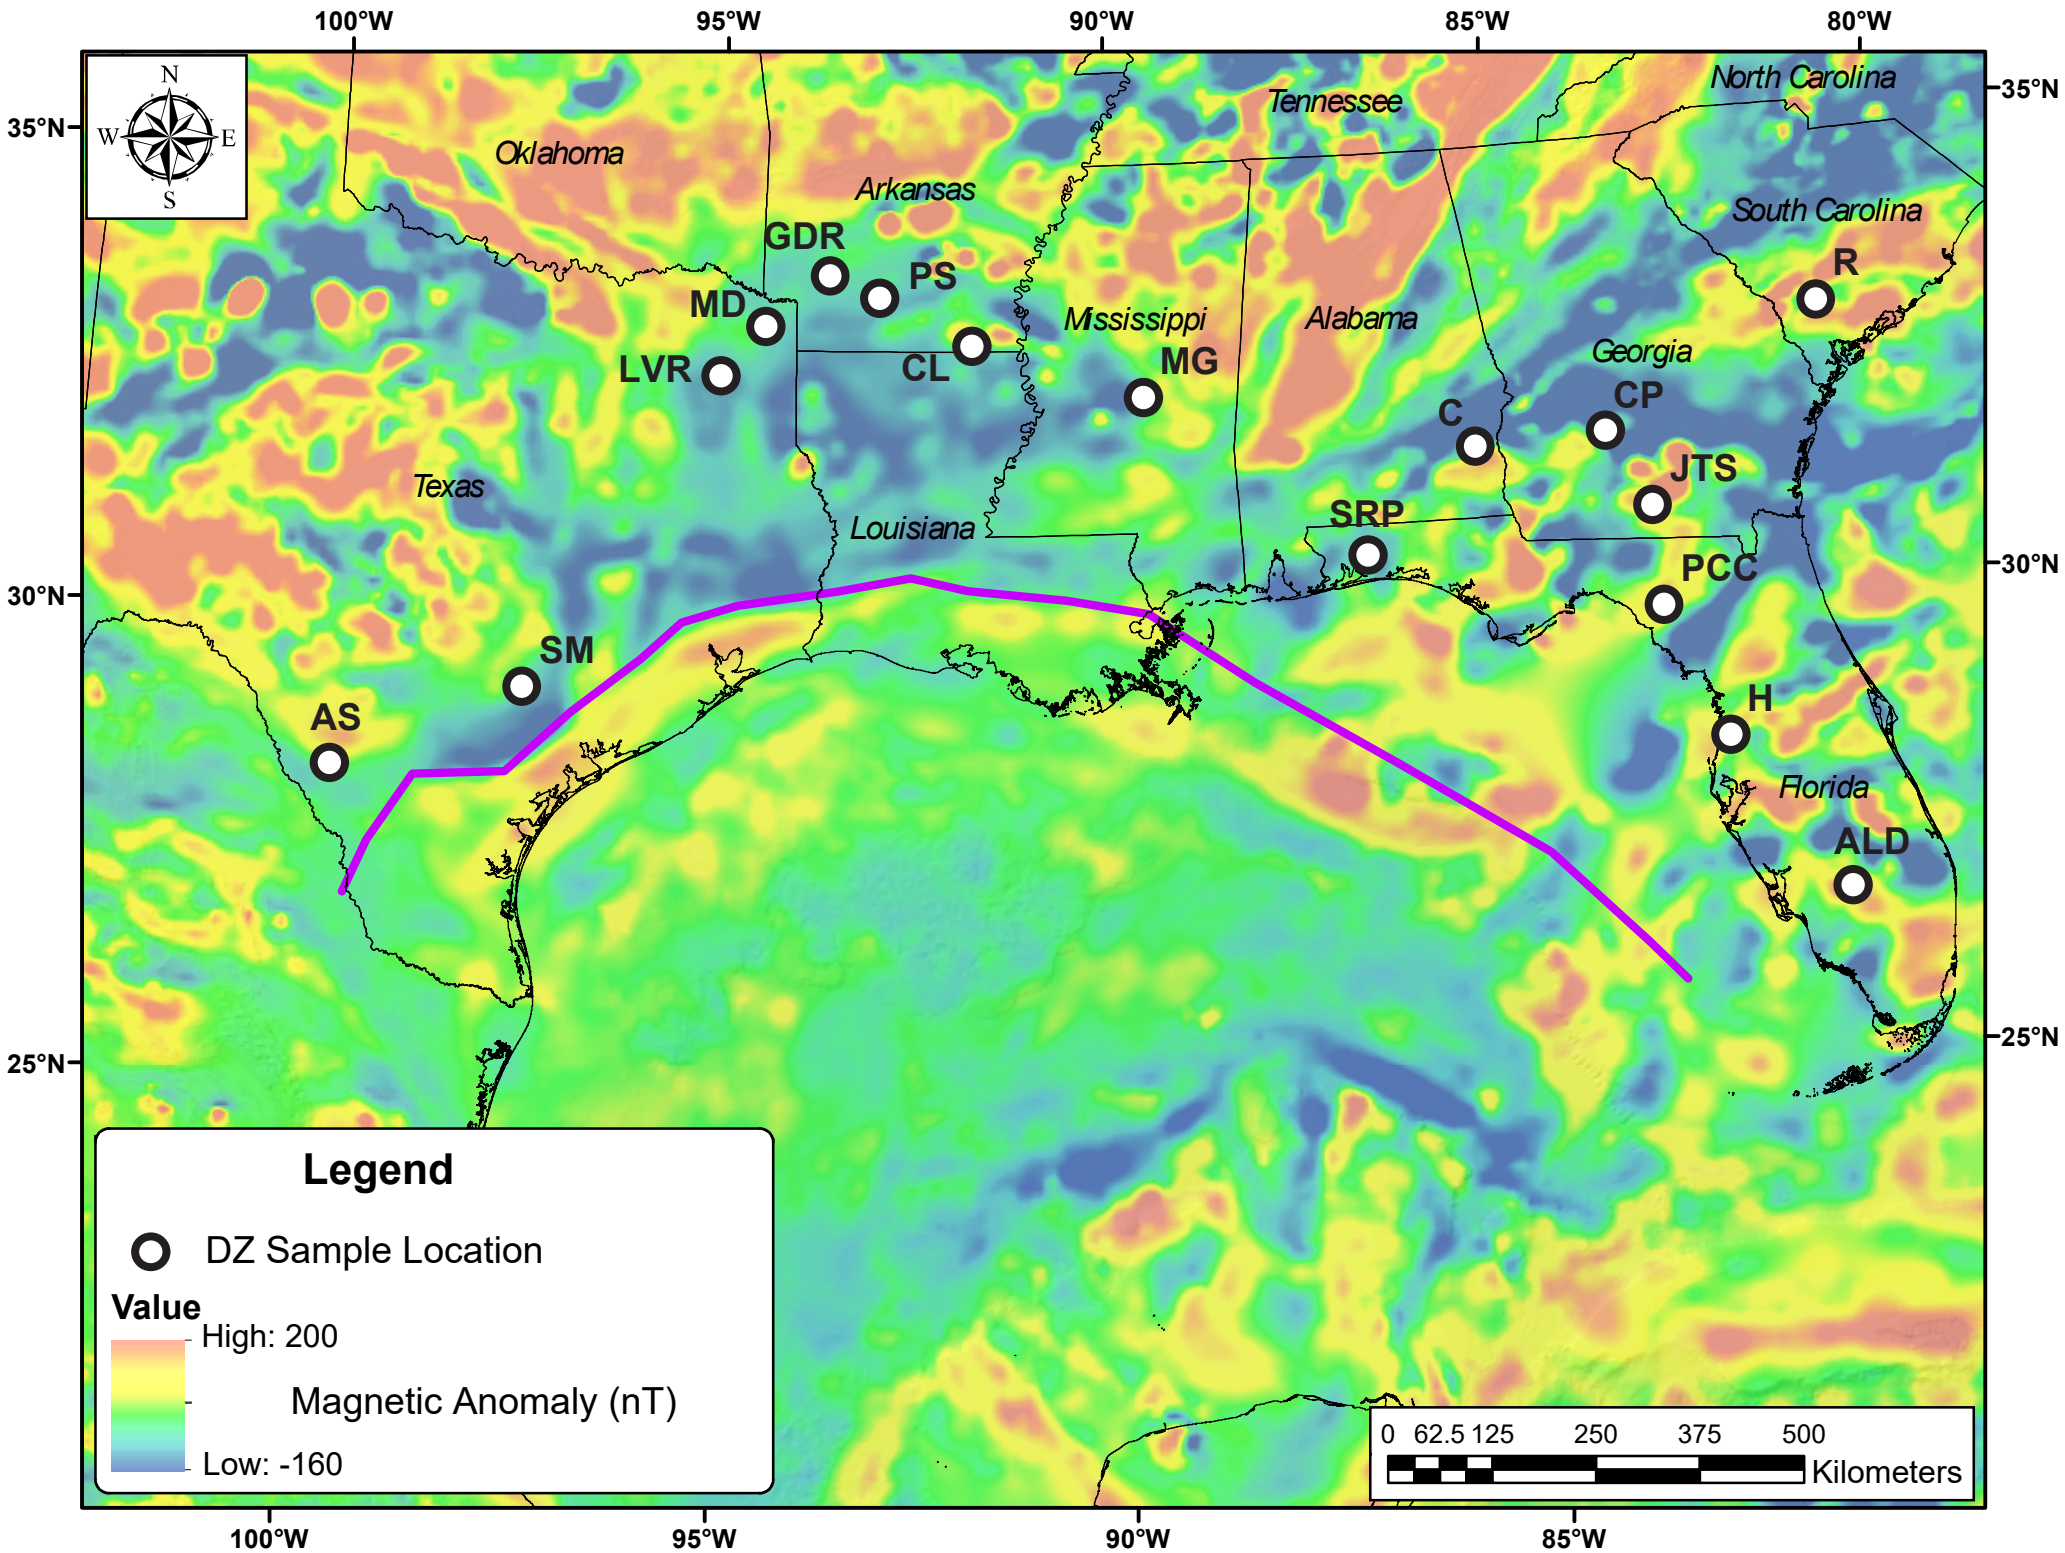

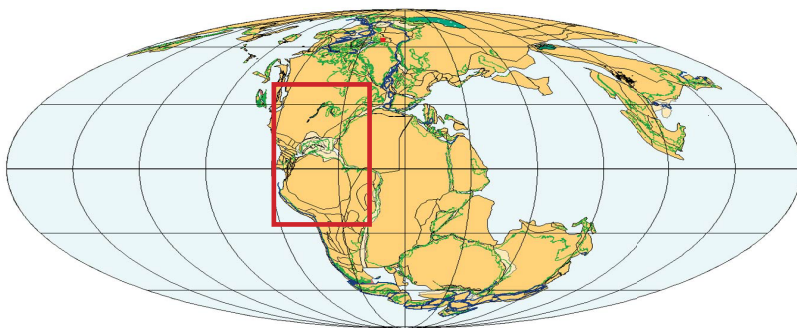

200Ma (Hettangian)

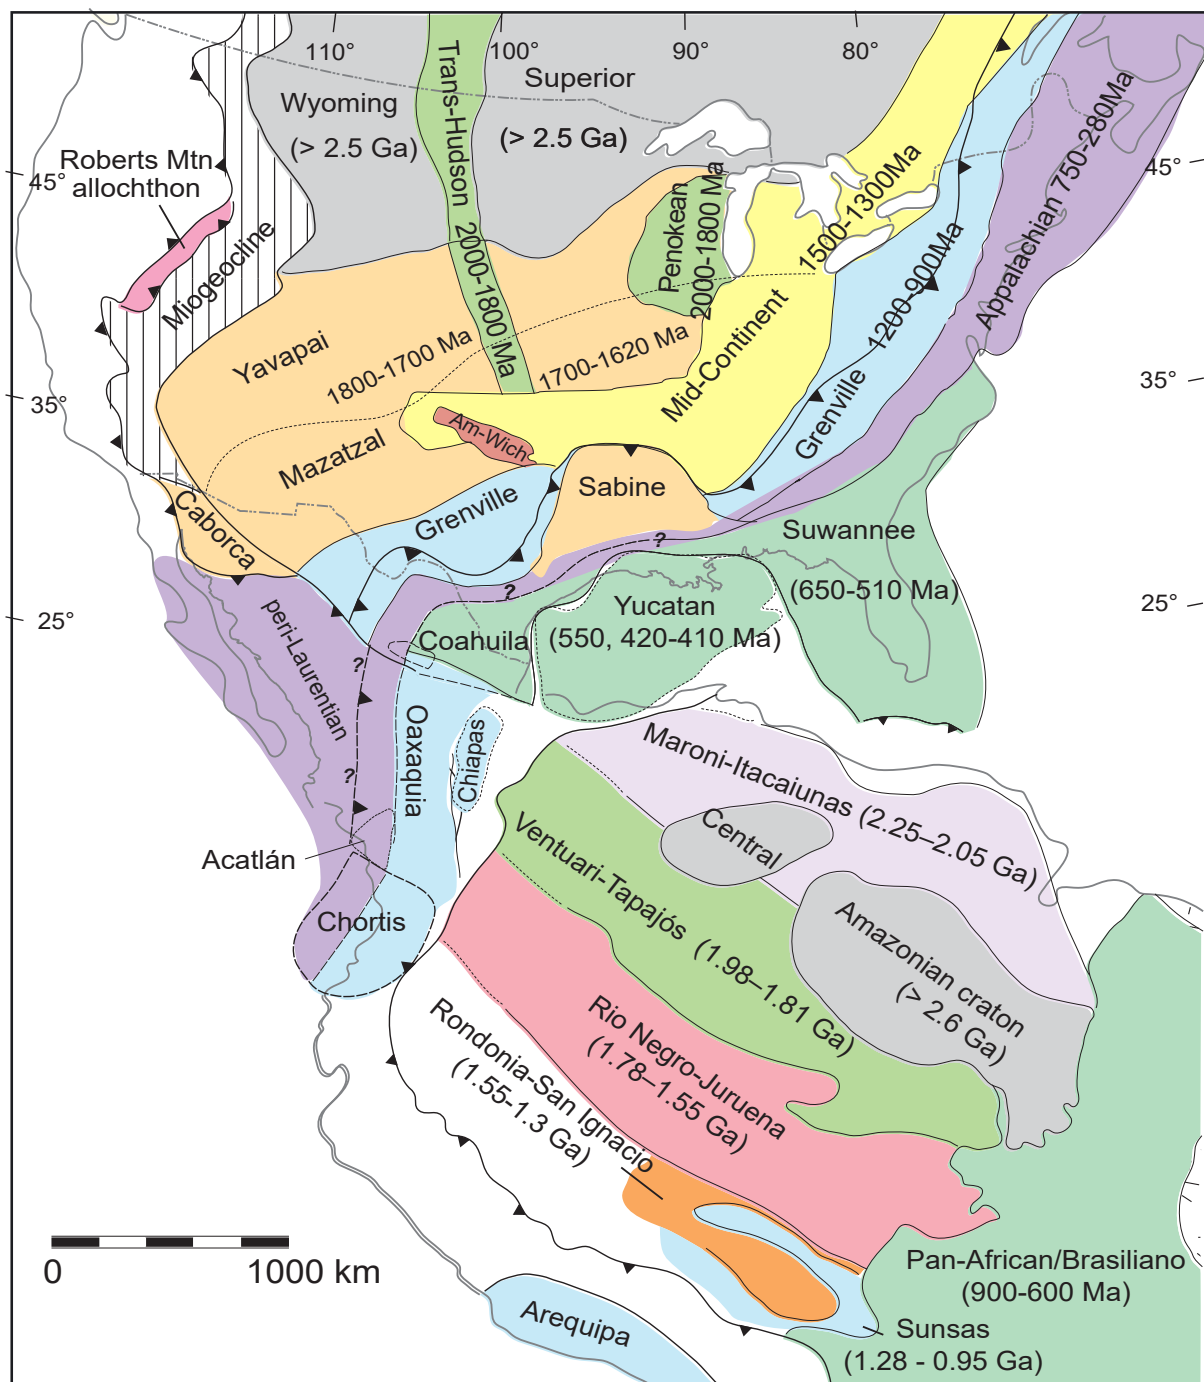

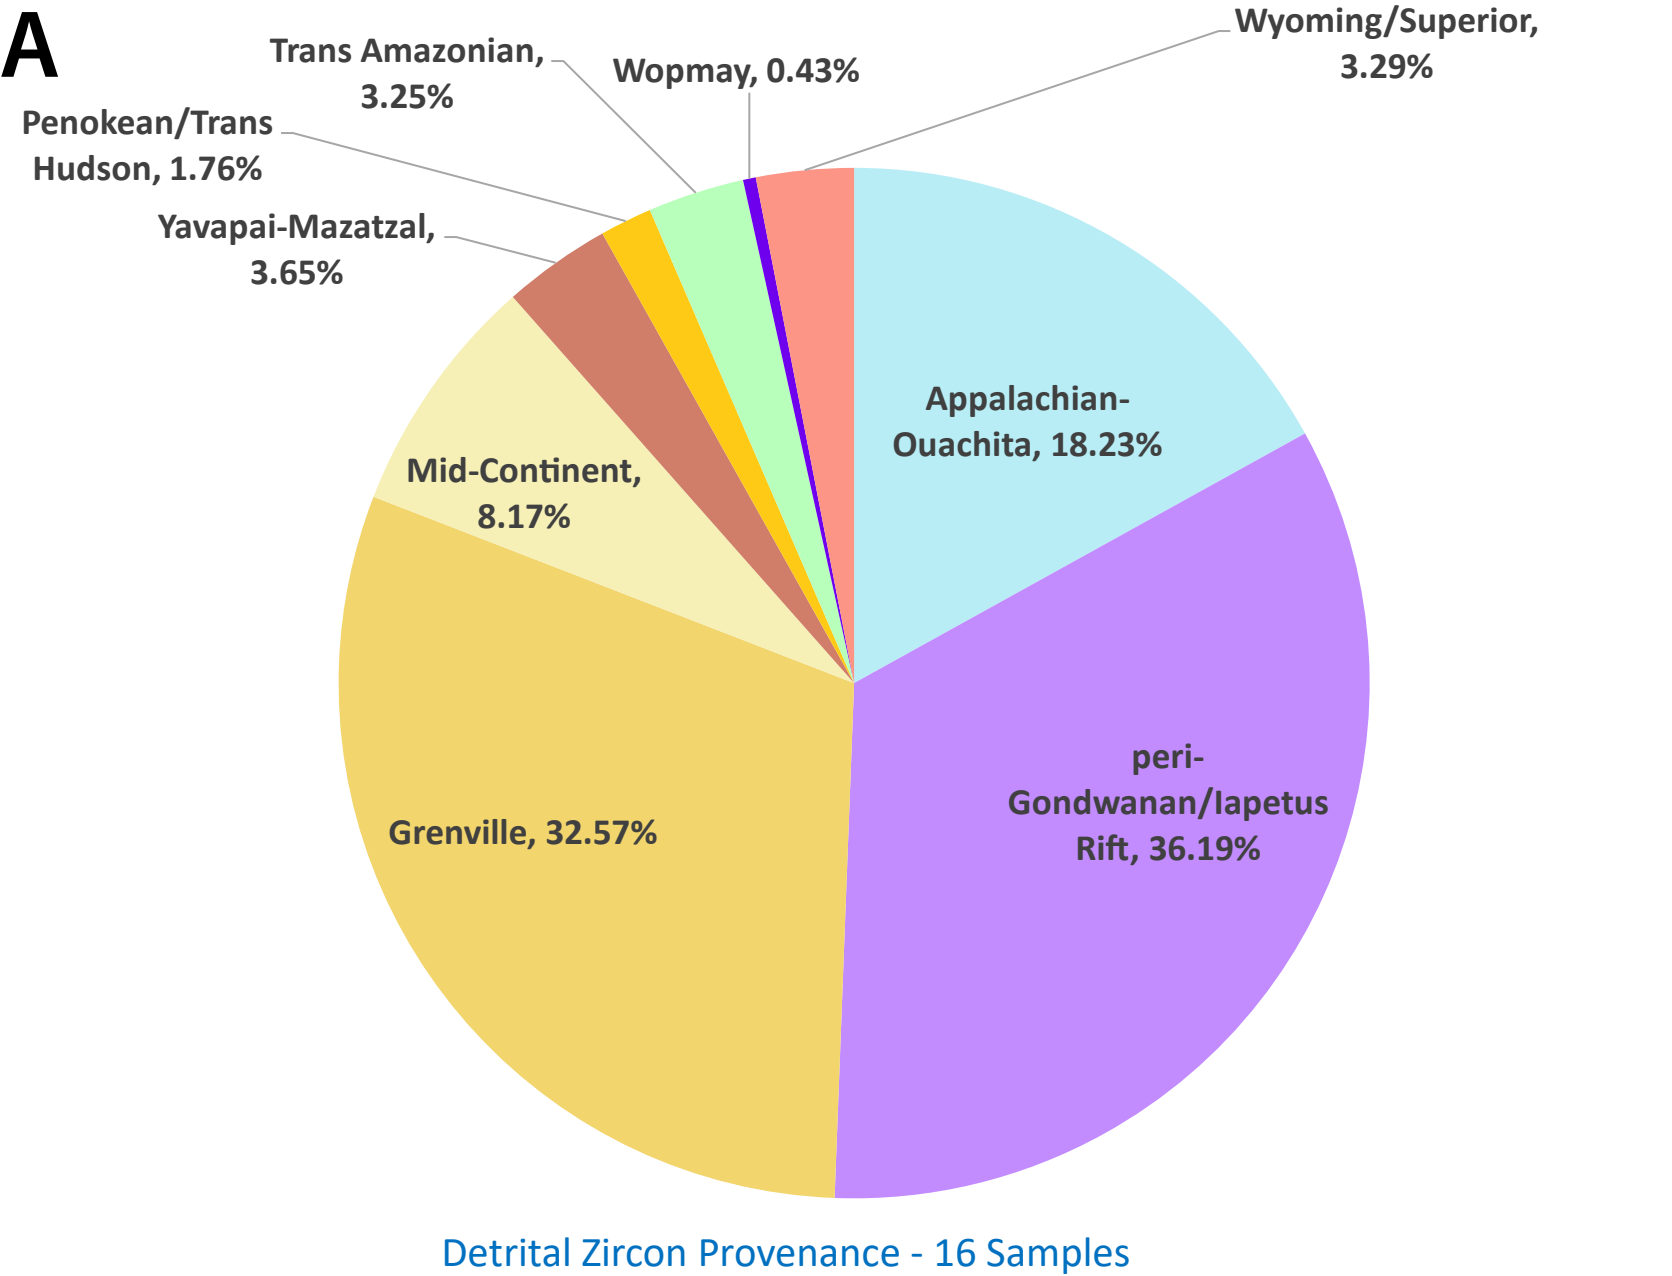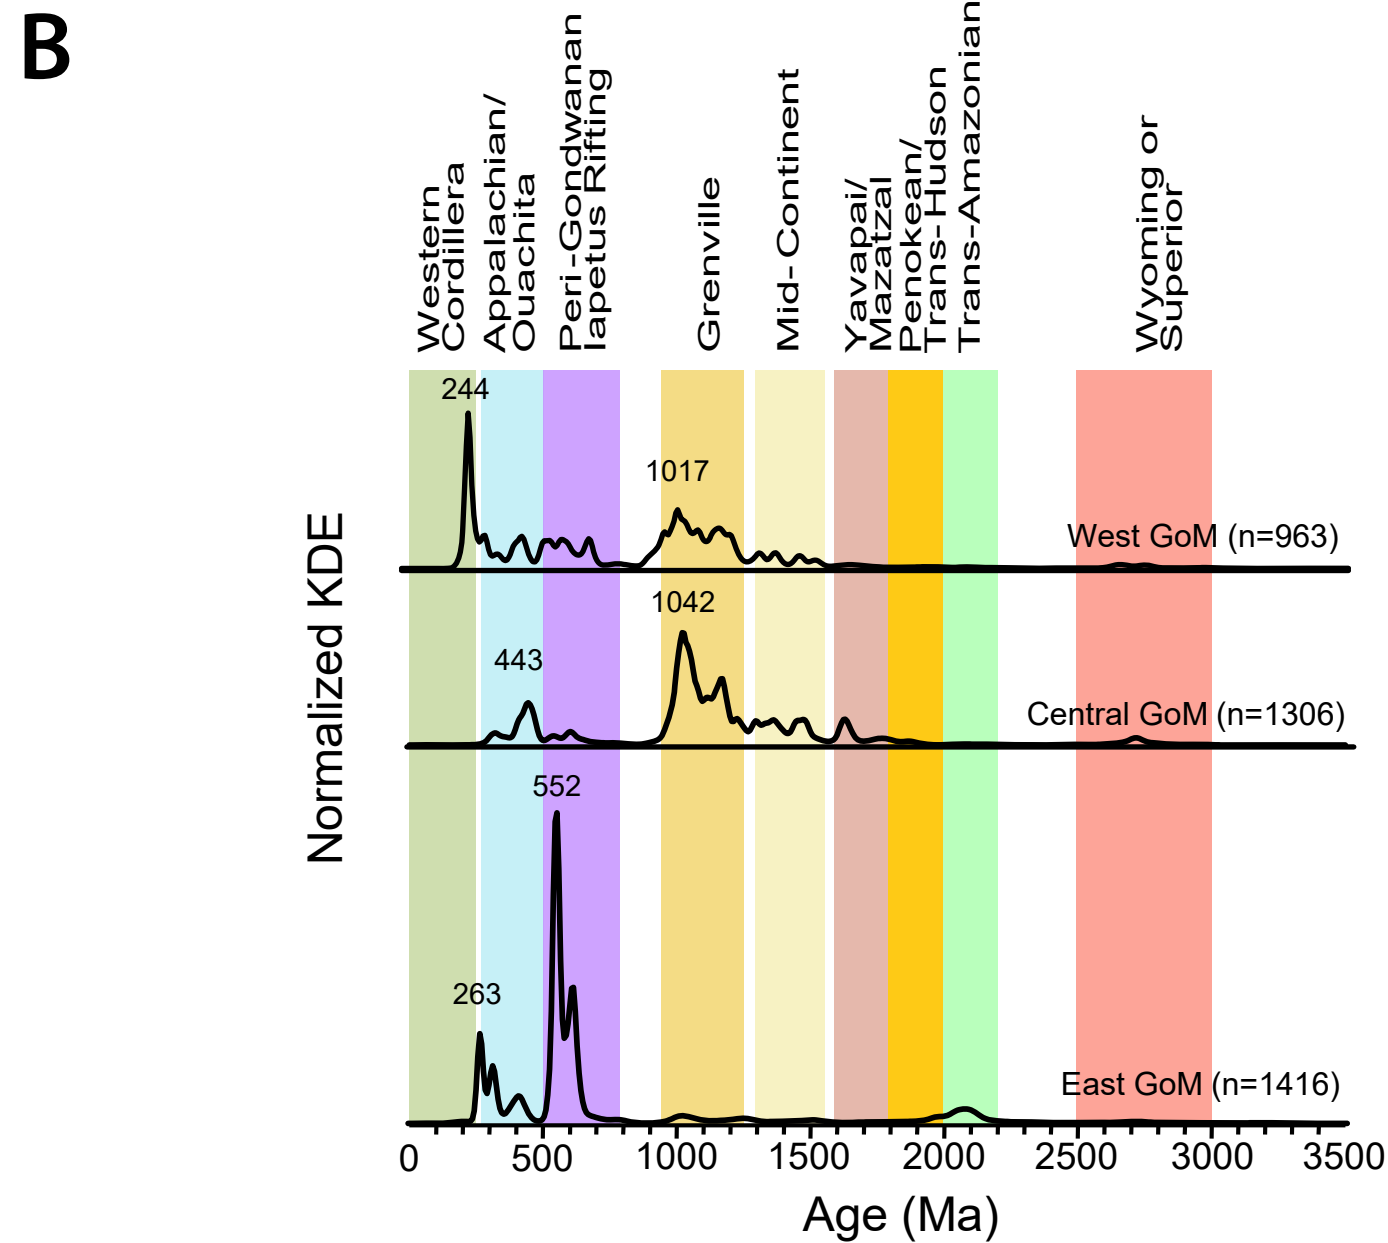

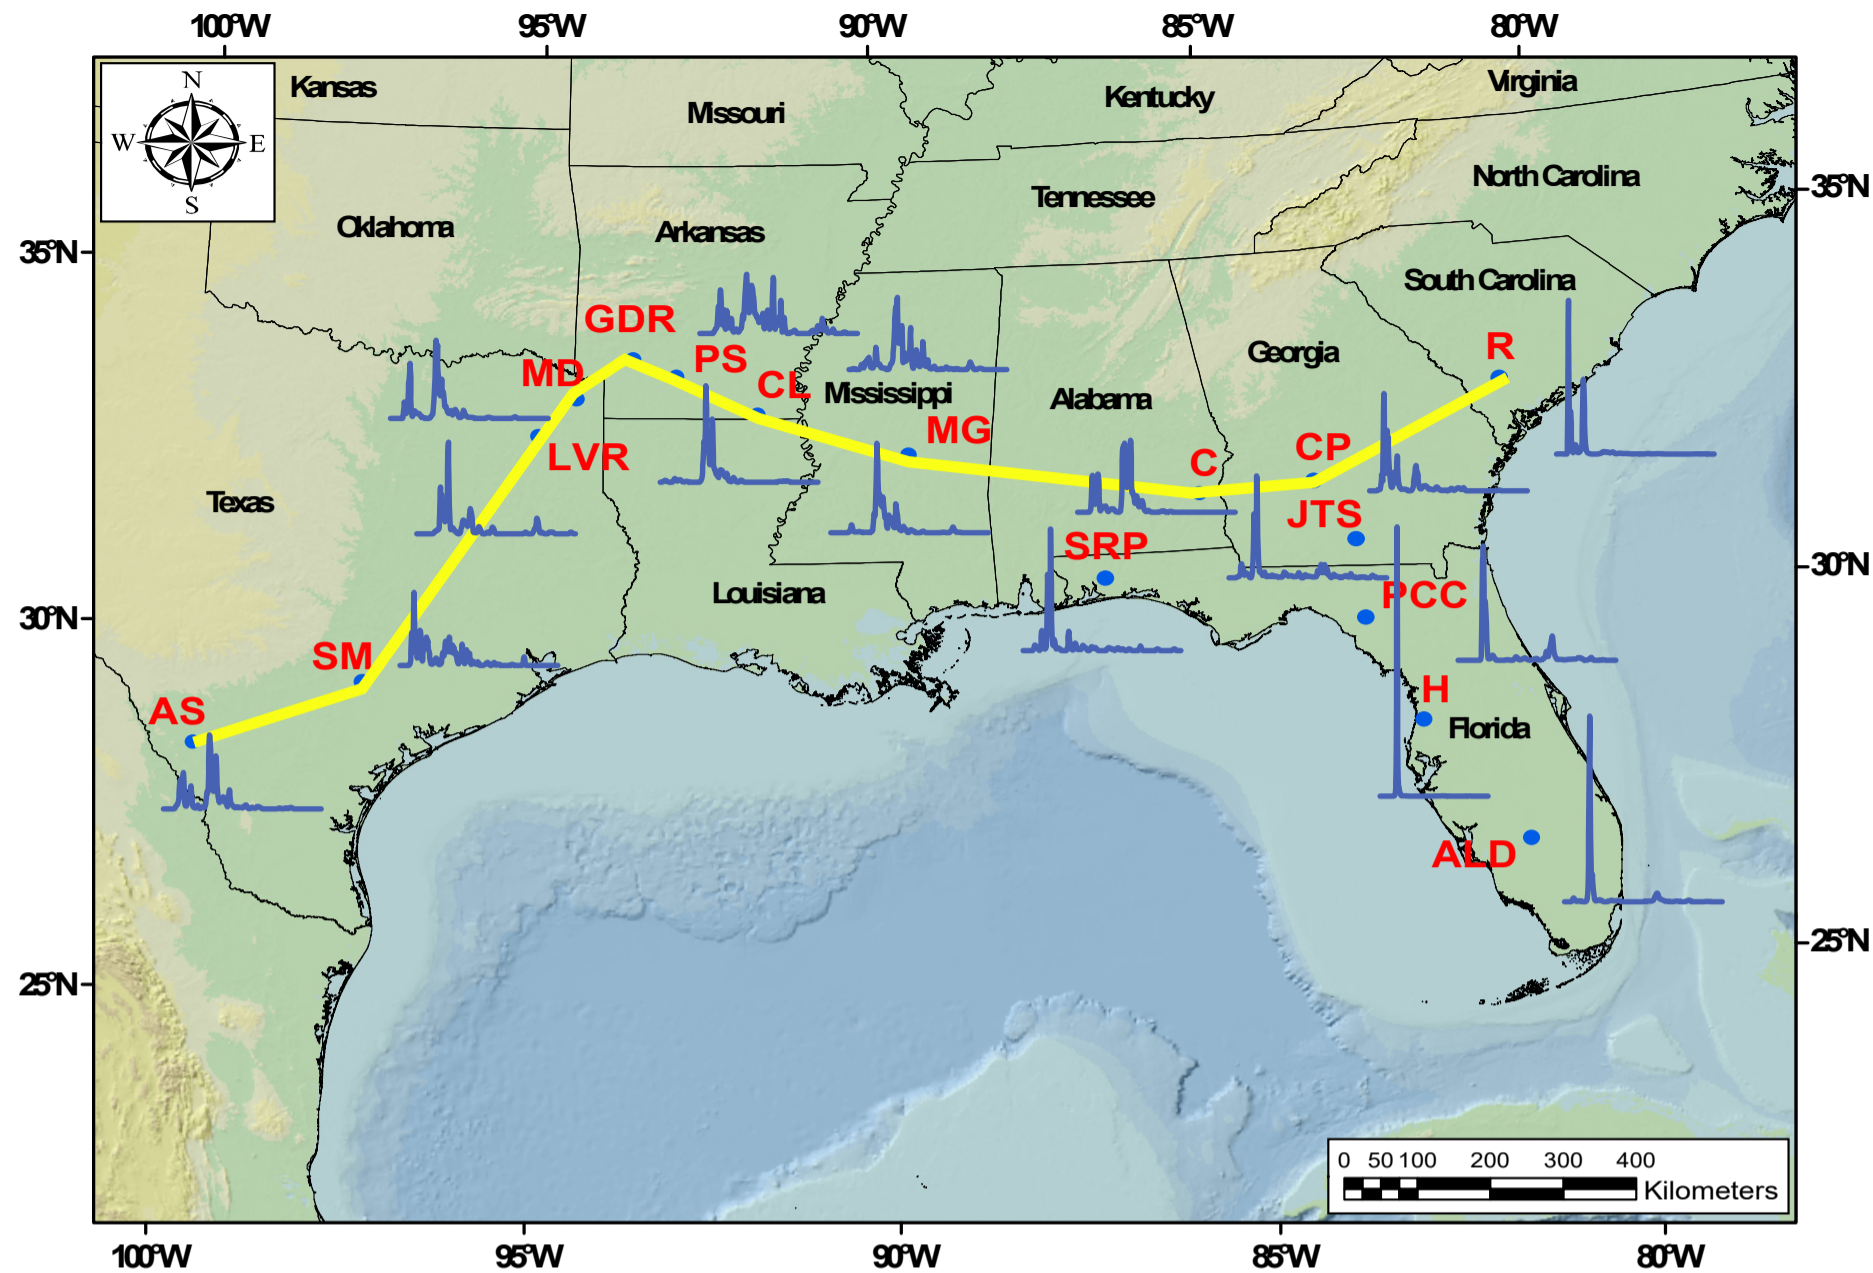

Detrital Zircon Provenance - Crustal Source Terrane Cumulative %

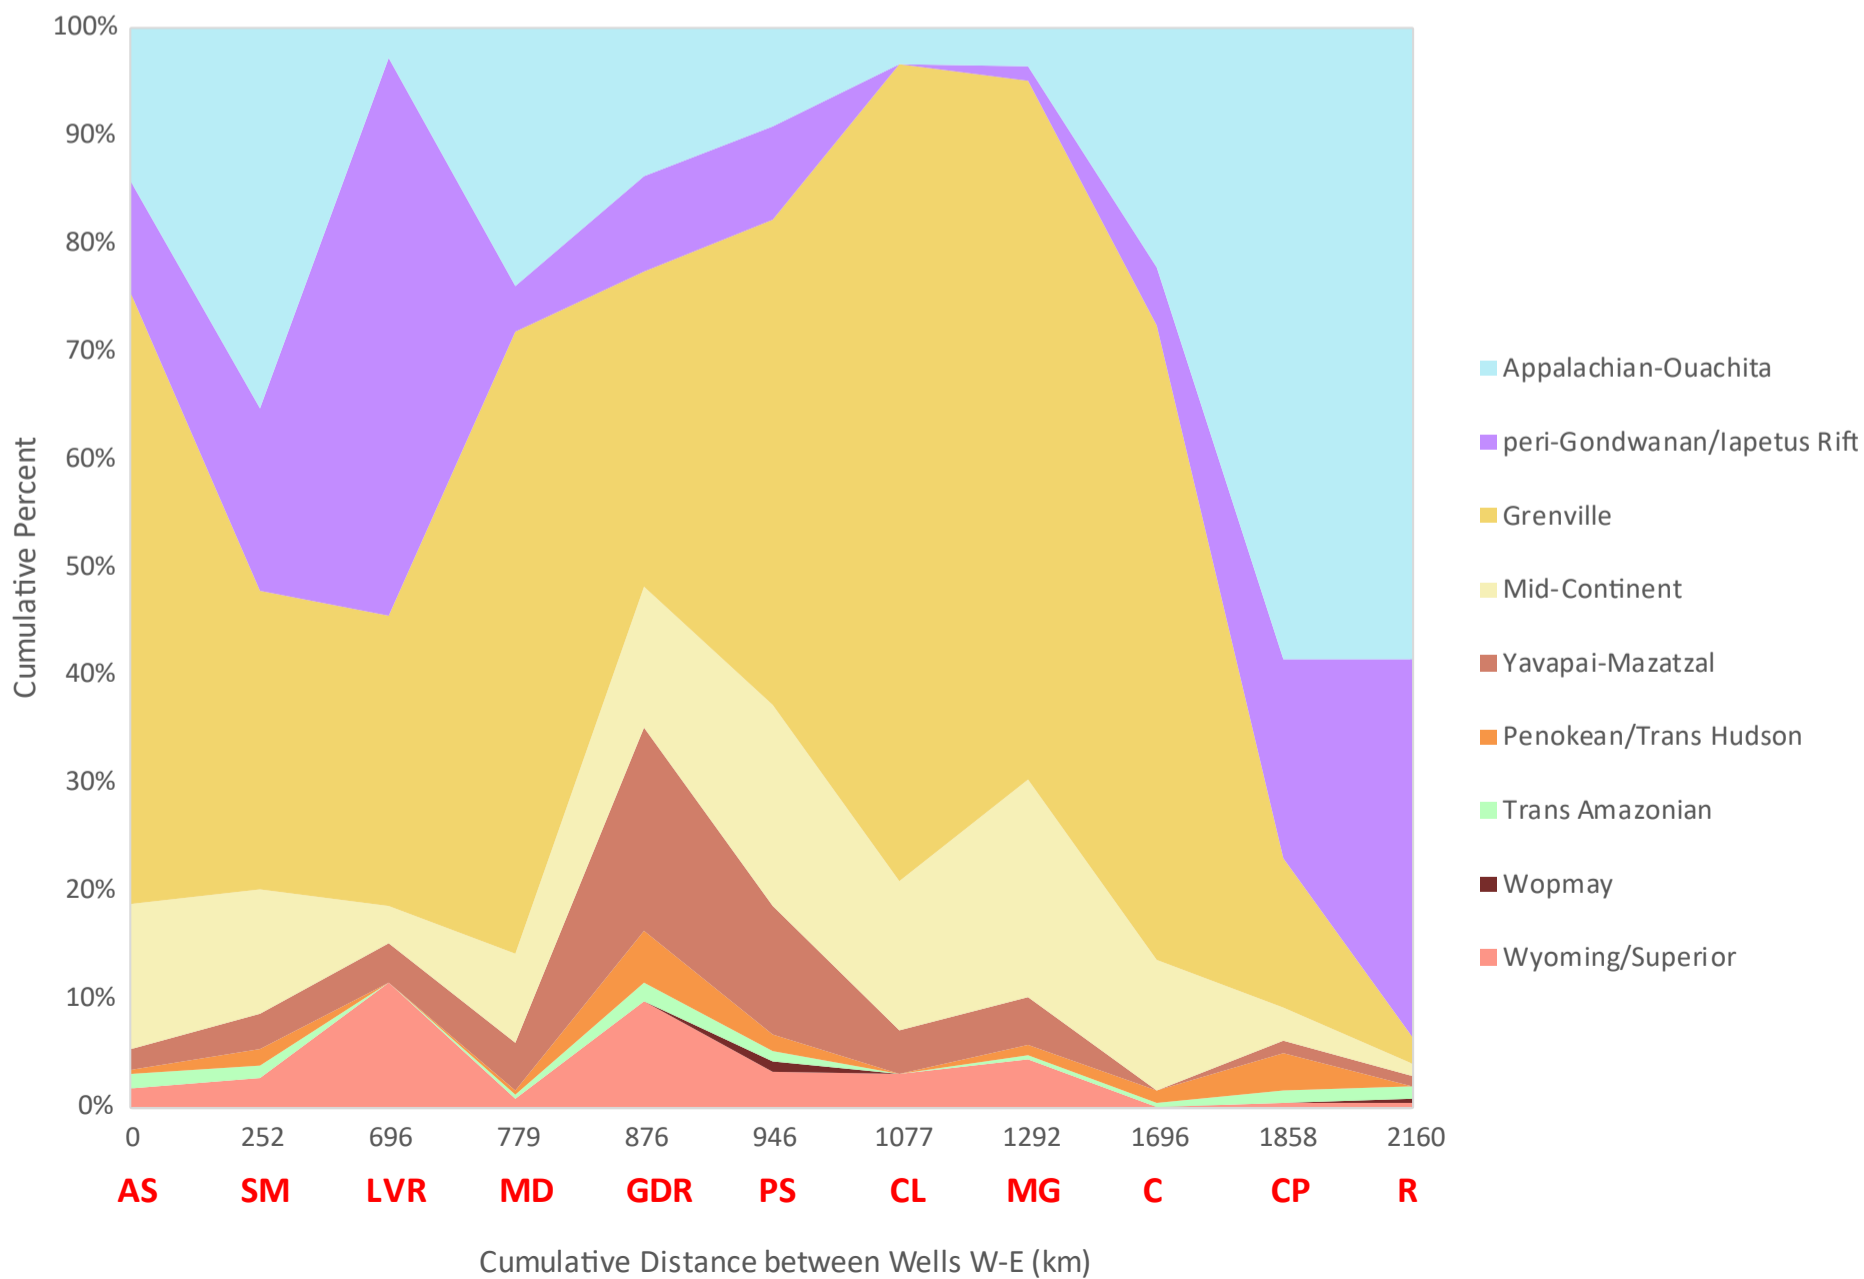

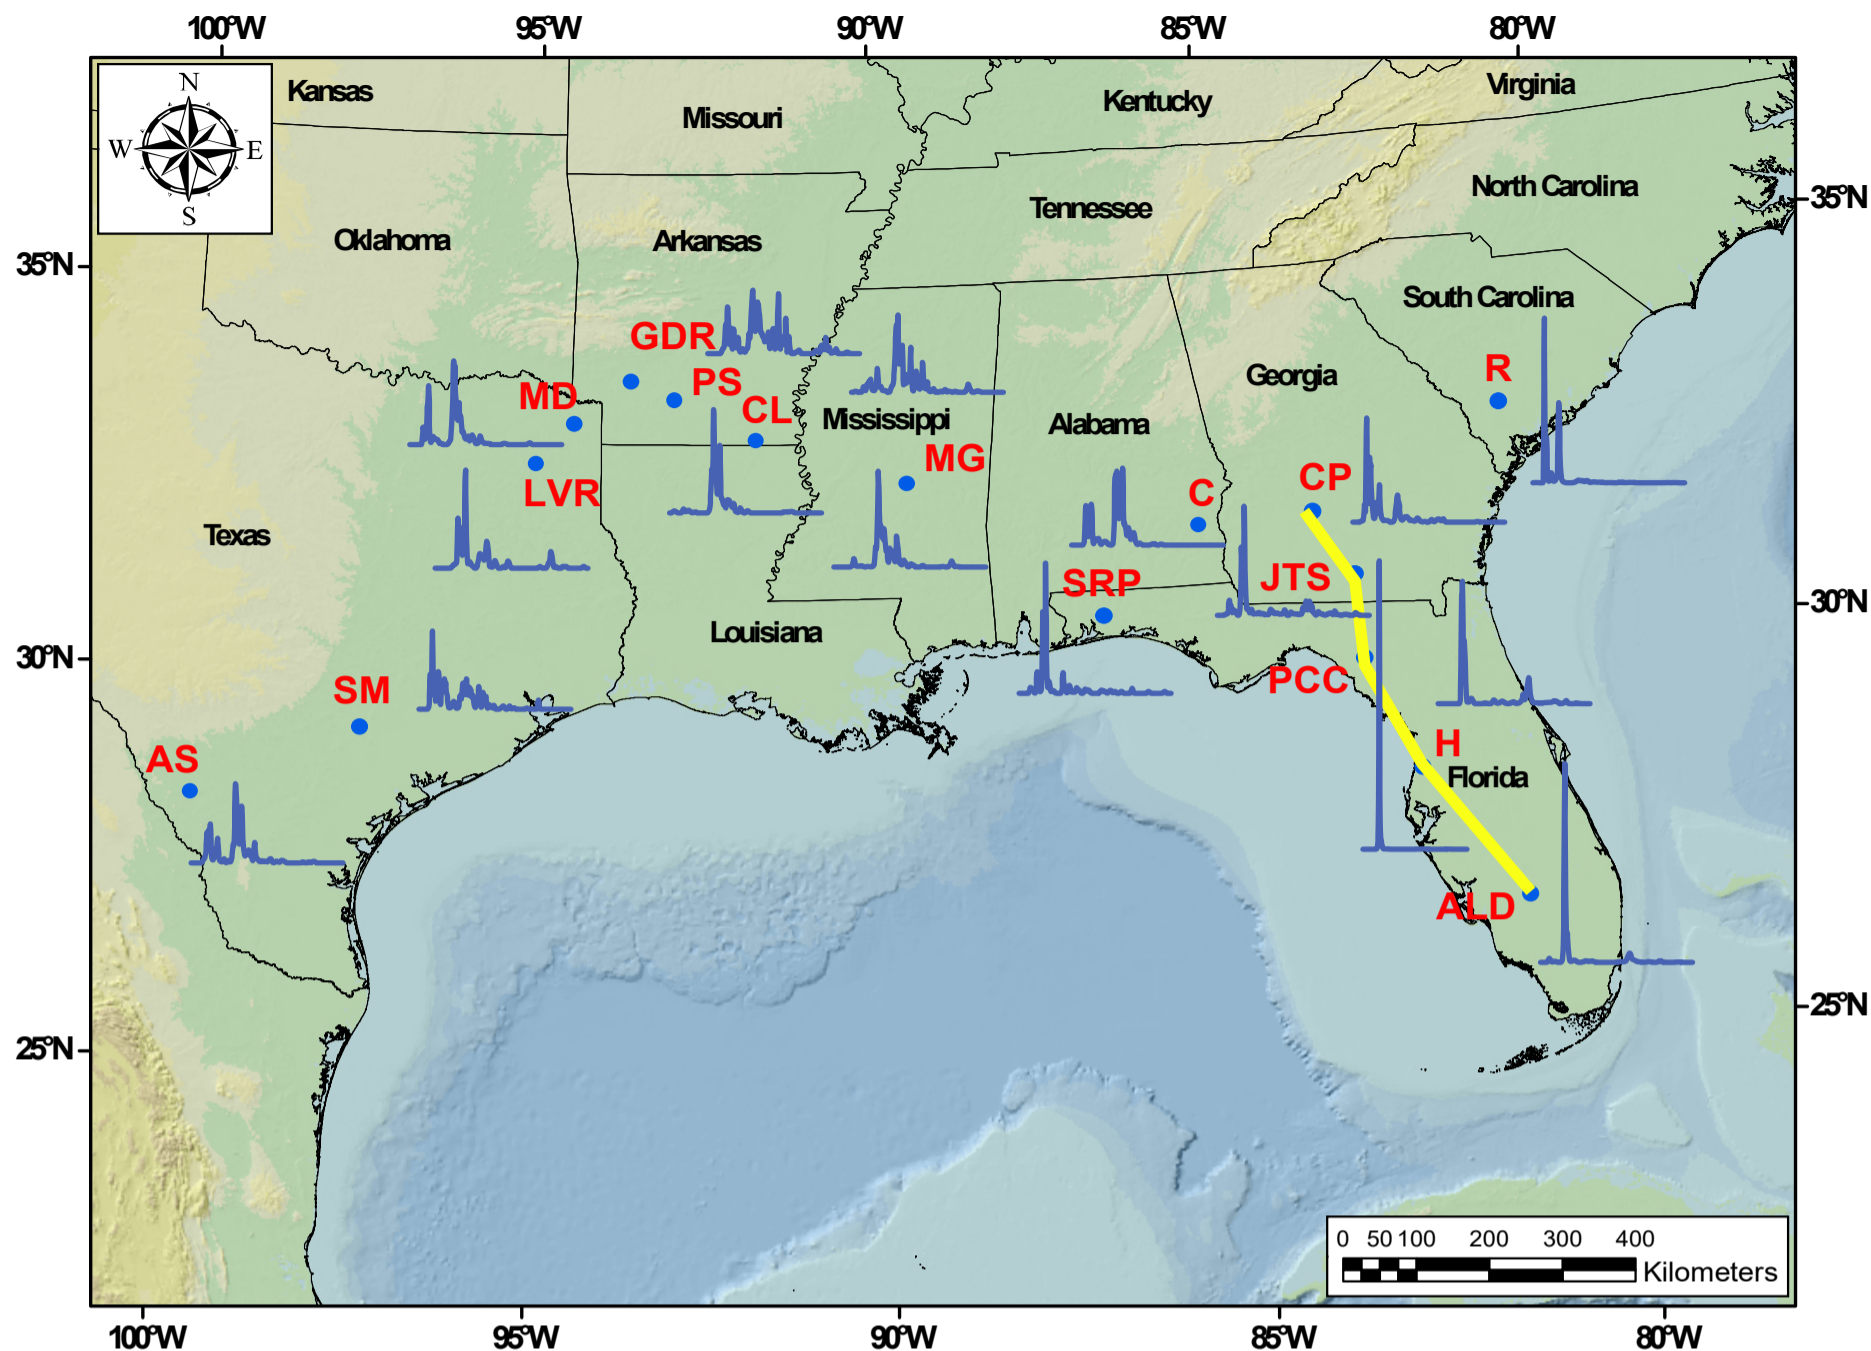

Detrital Zircon Provenance - Crustal Source Terrane Cumulative %

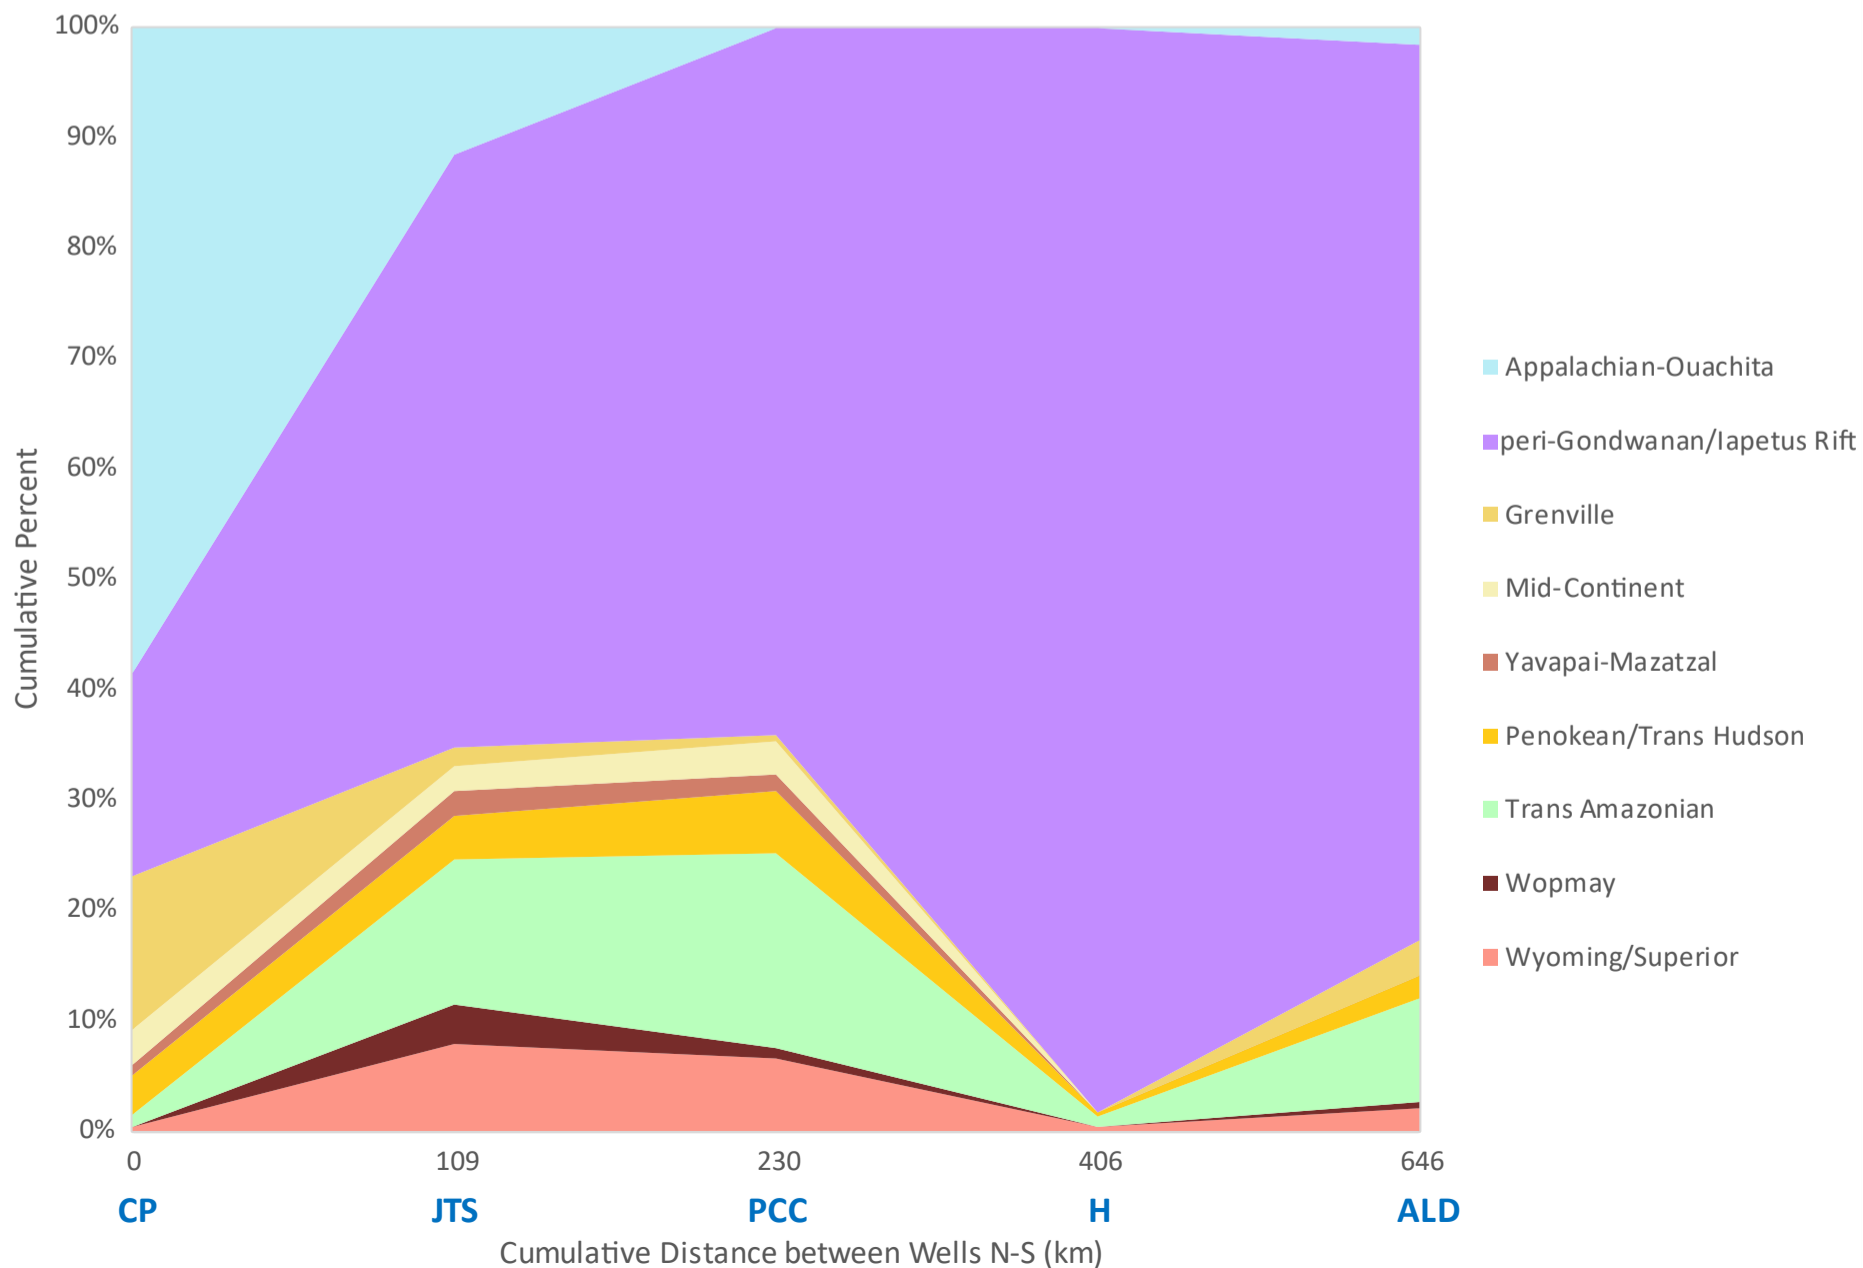

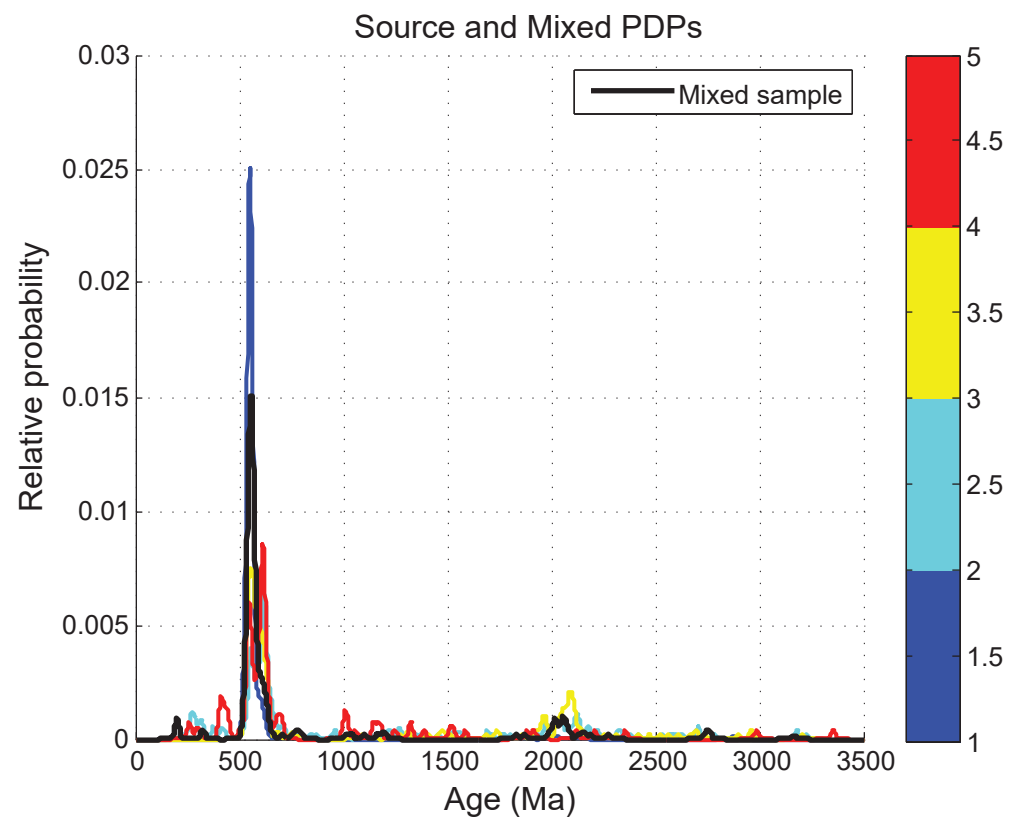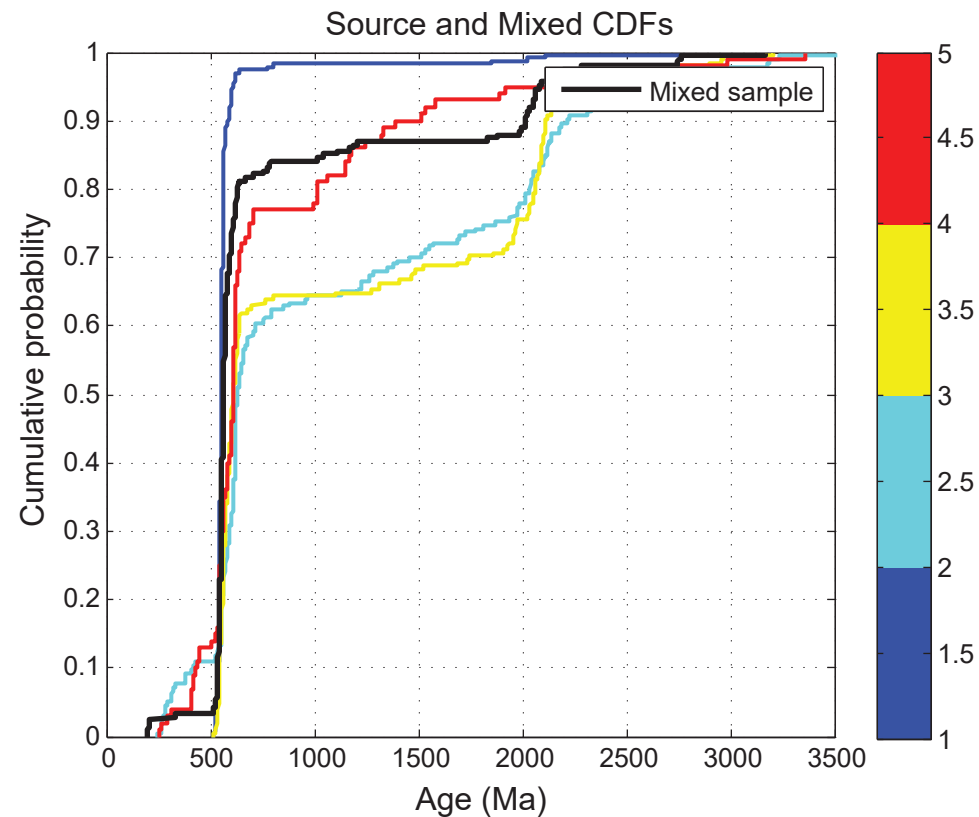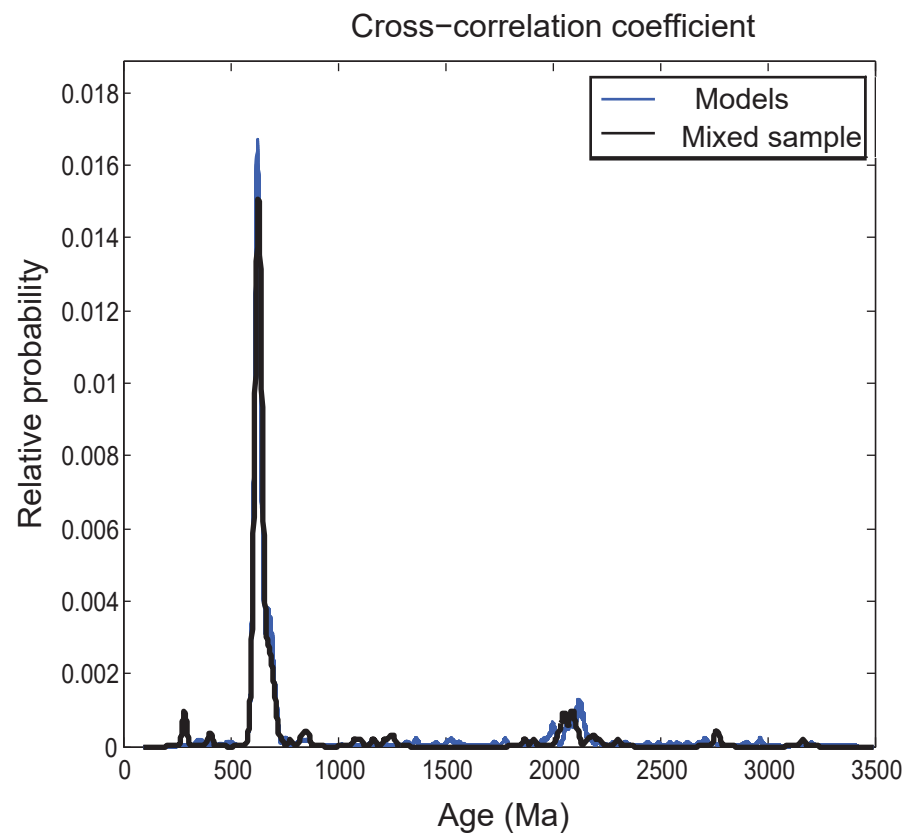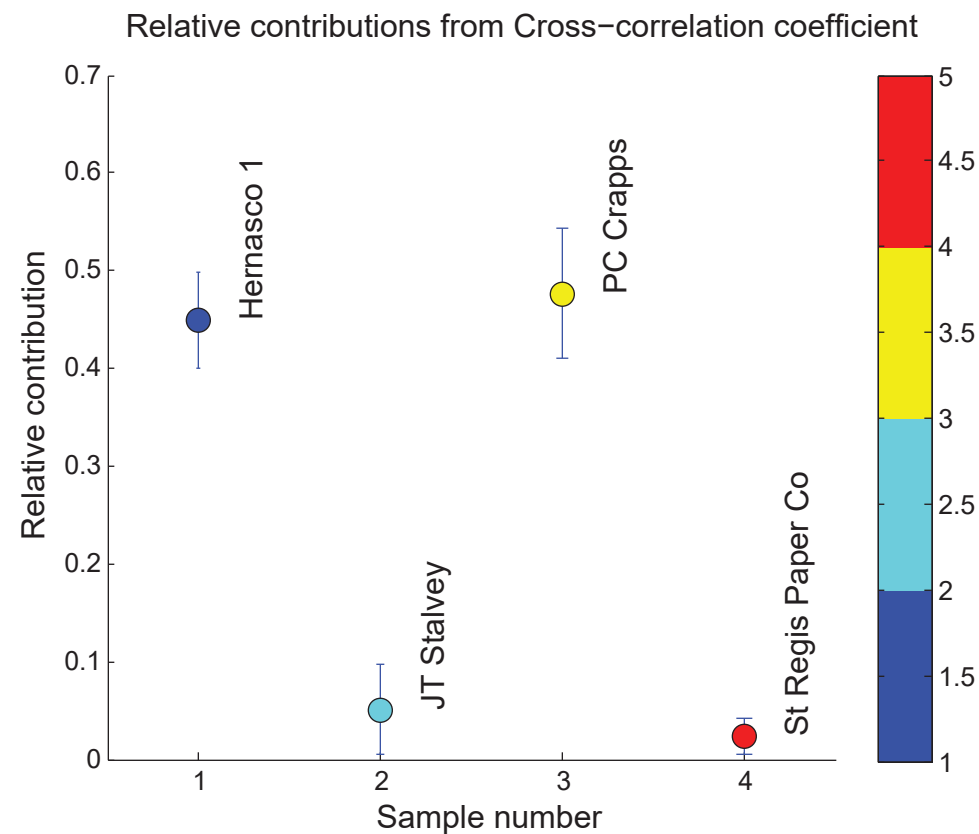

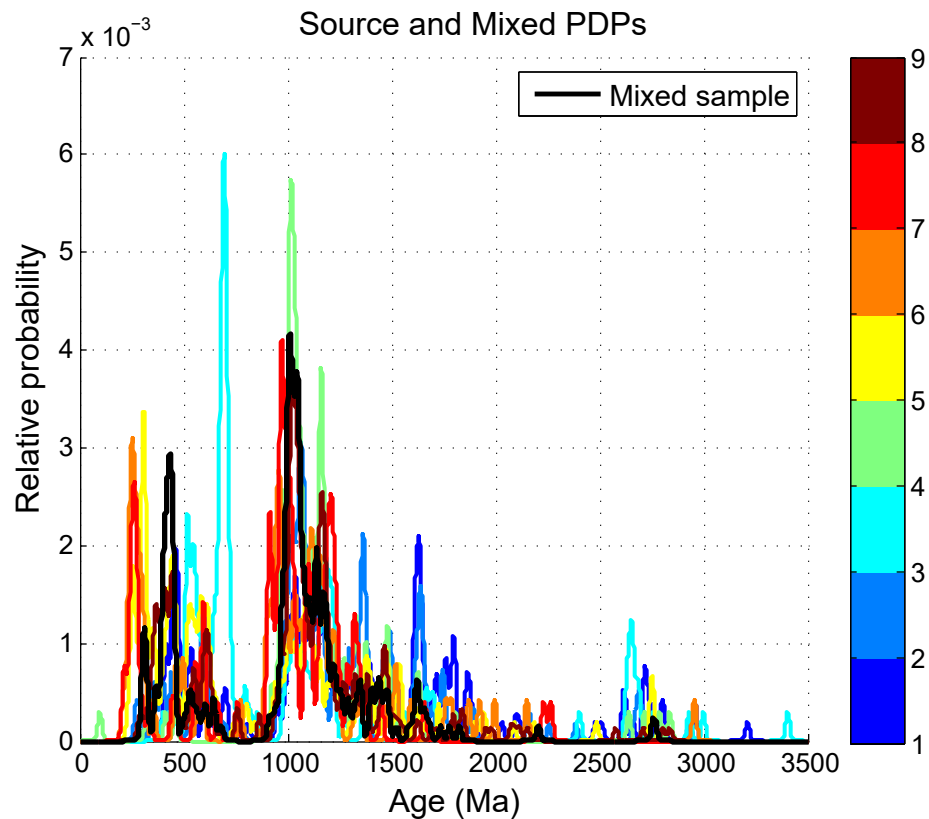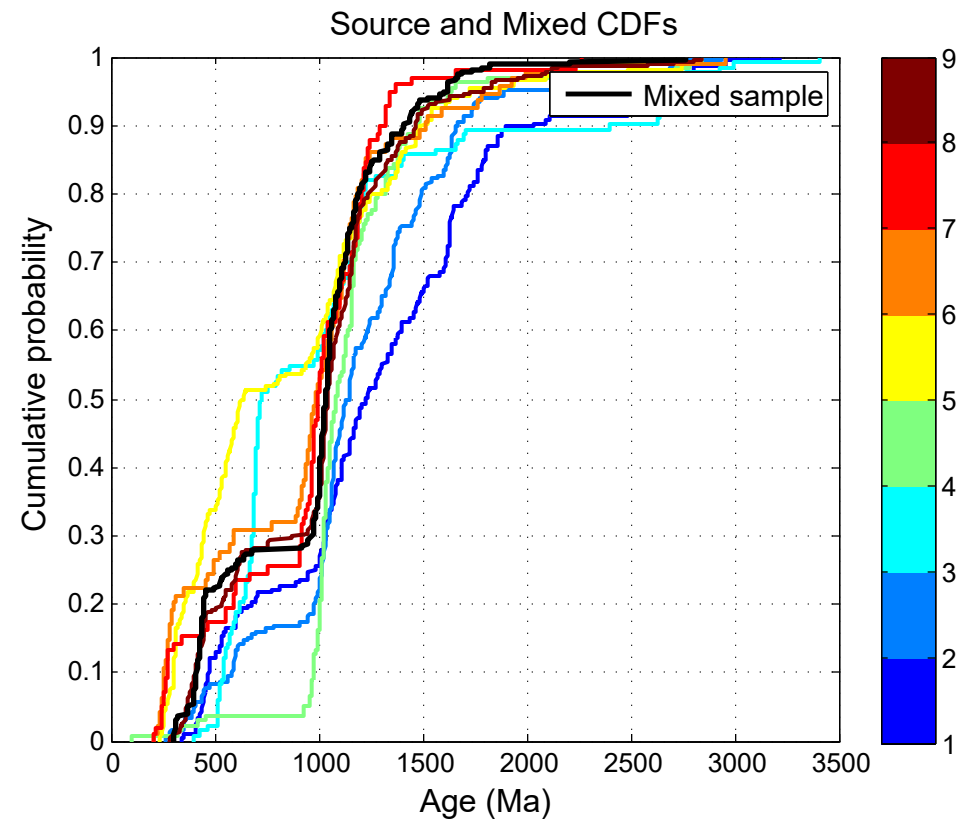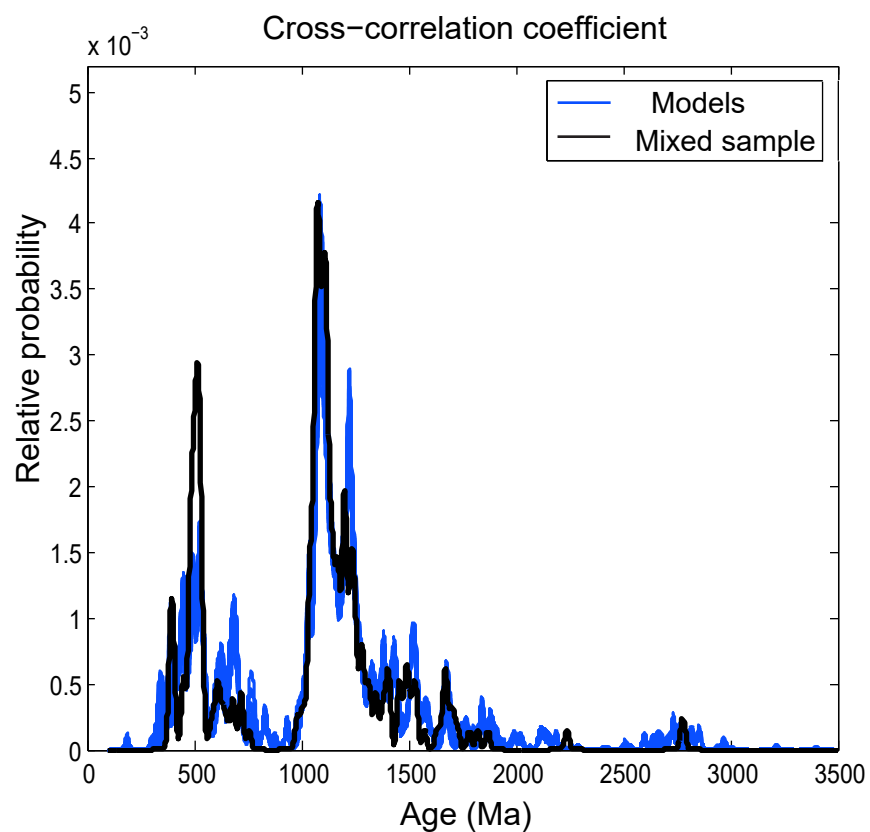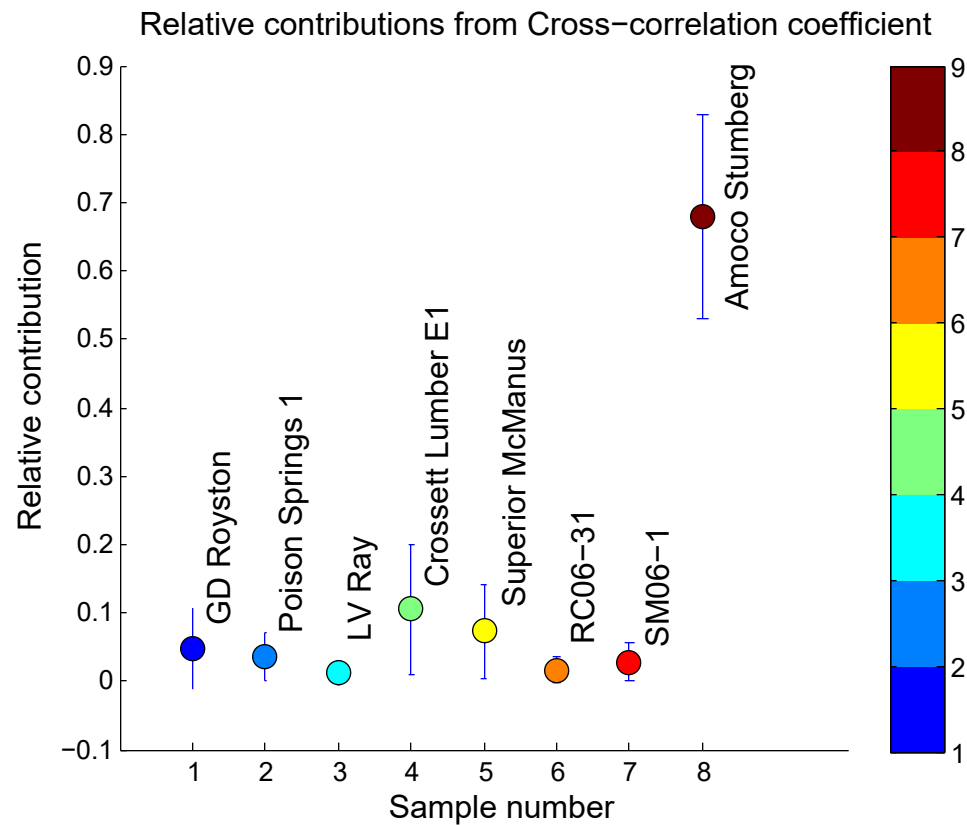

A) RC06-31 DZ Mix analysis

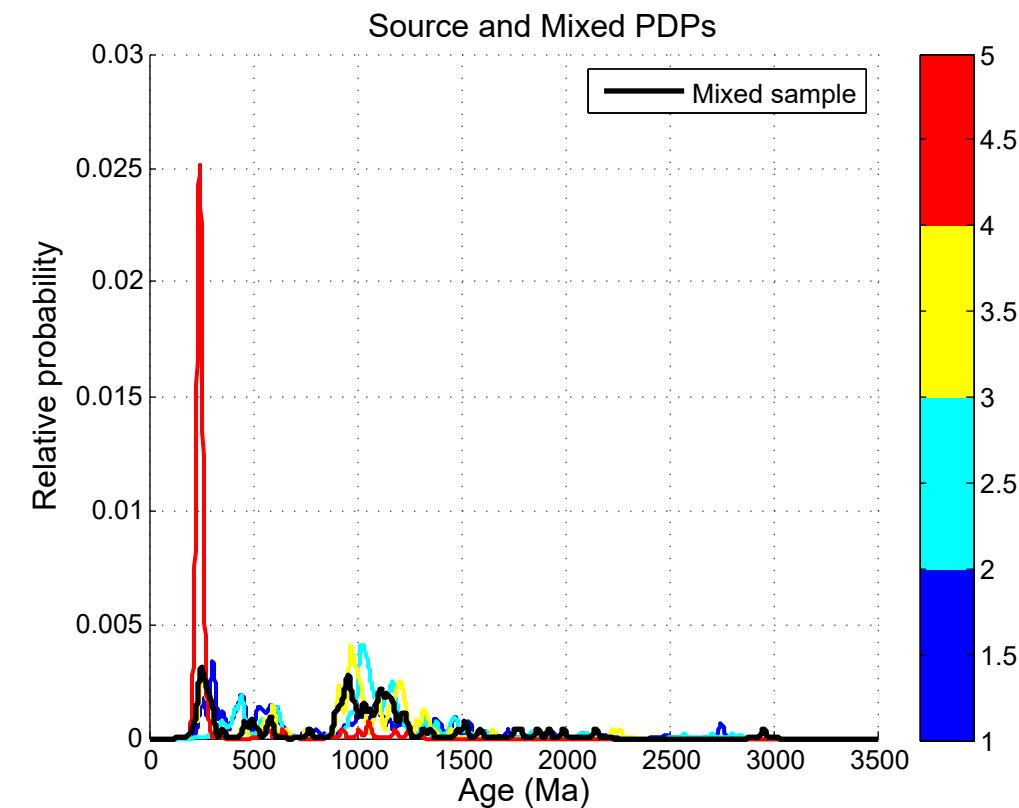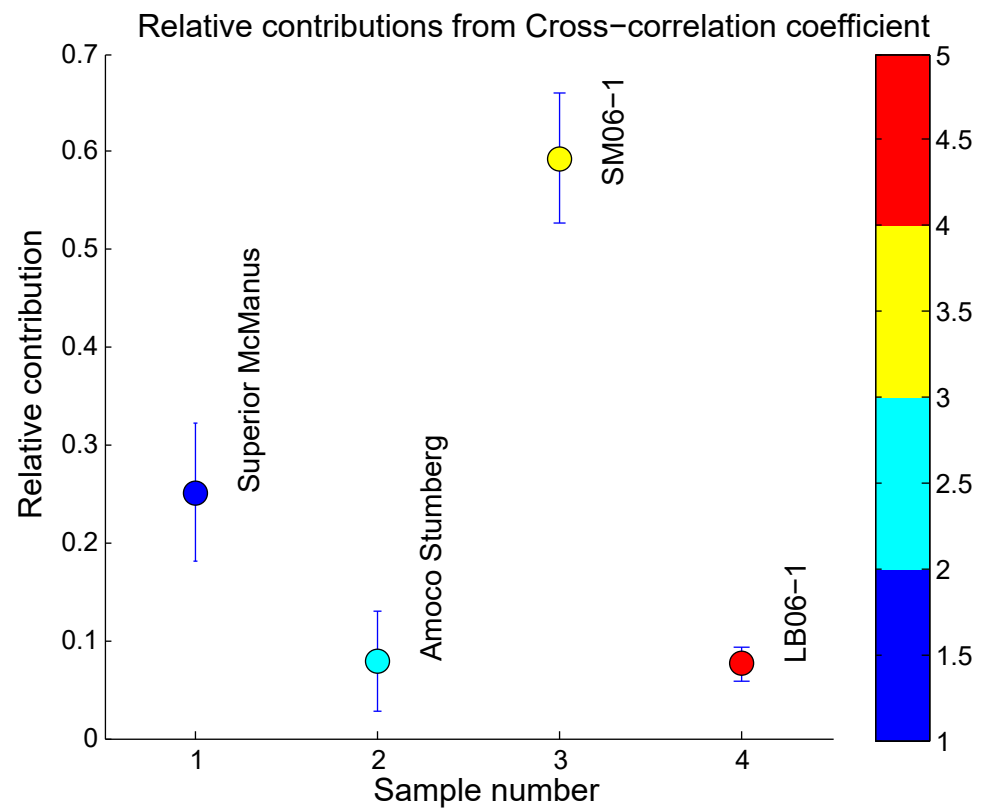

B) CH06-1 DZ Mix analysis

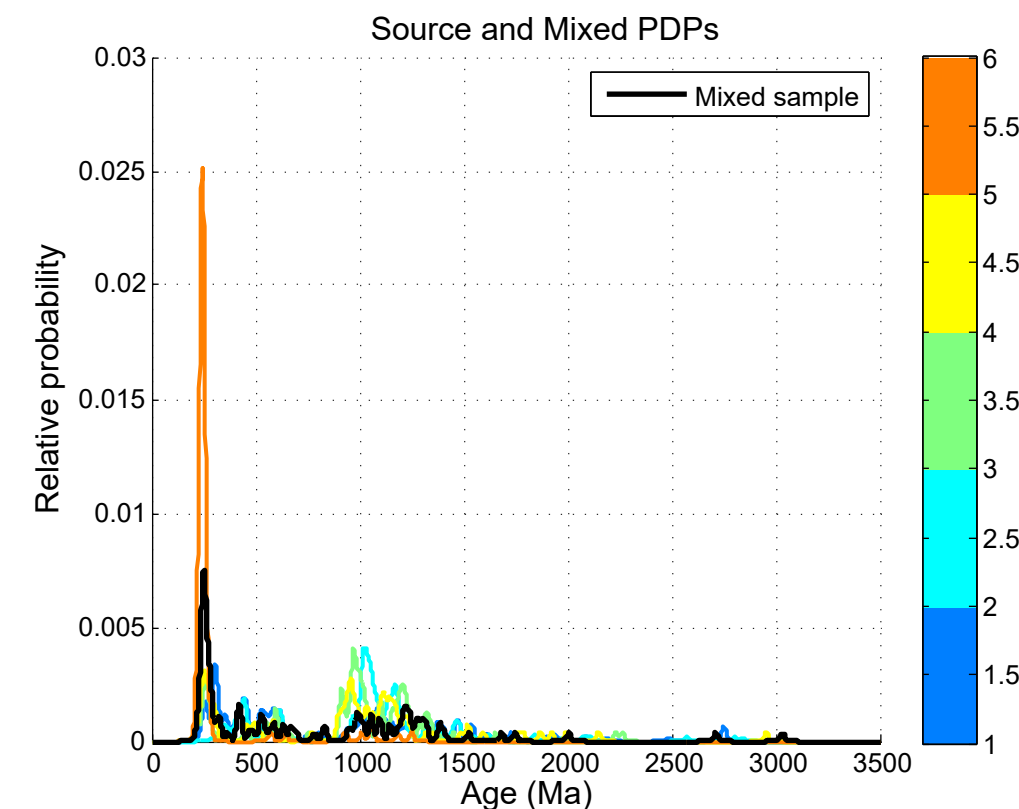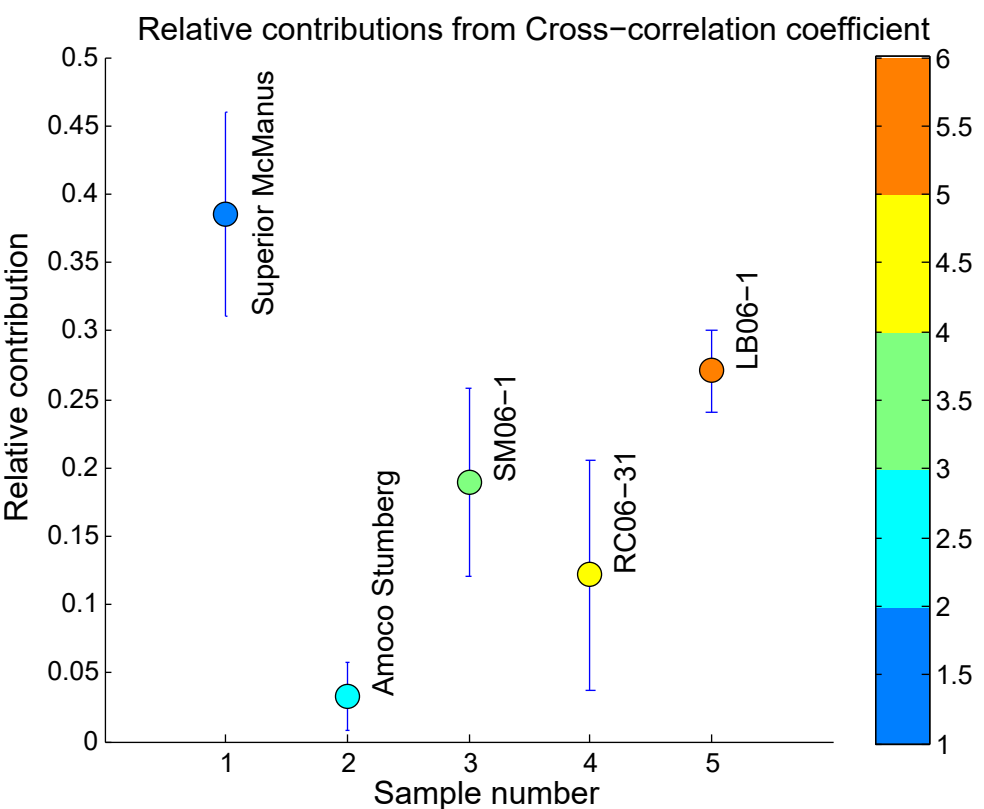

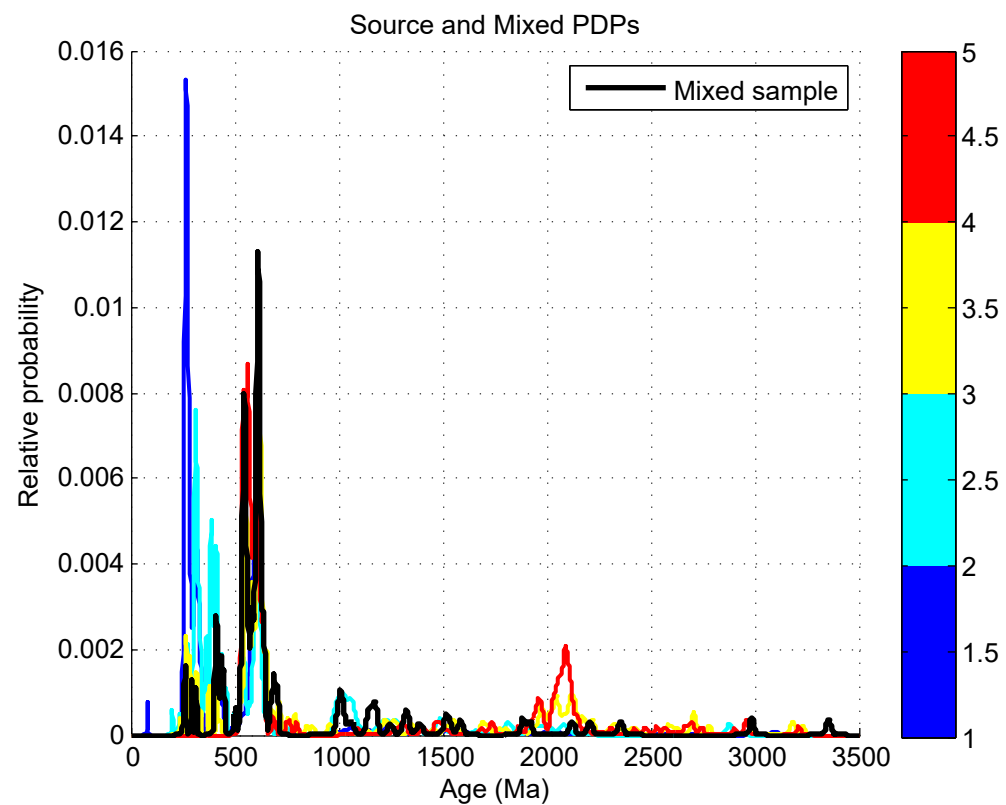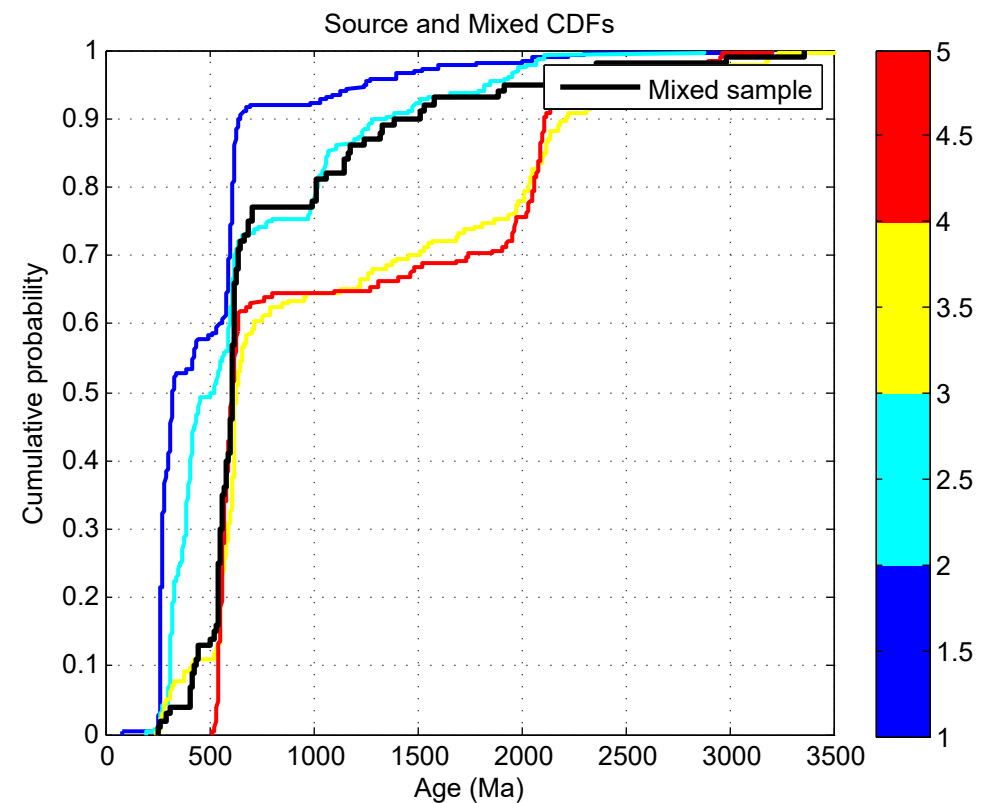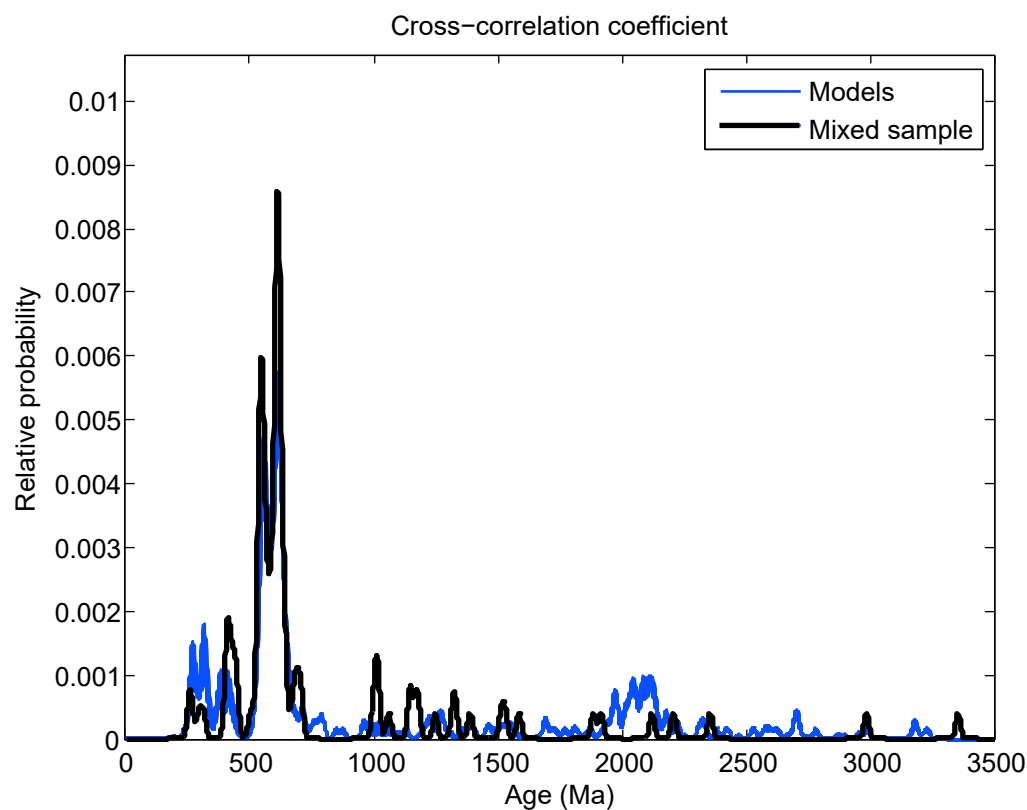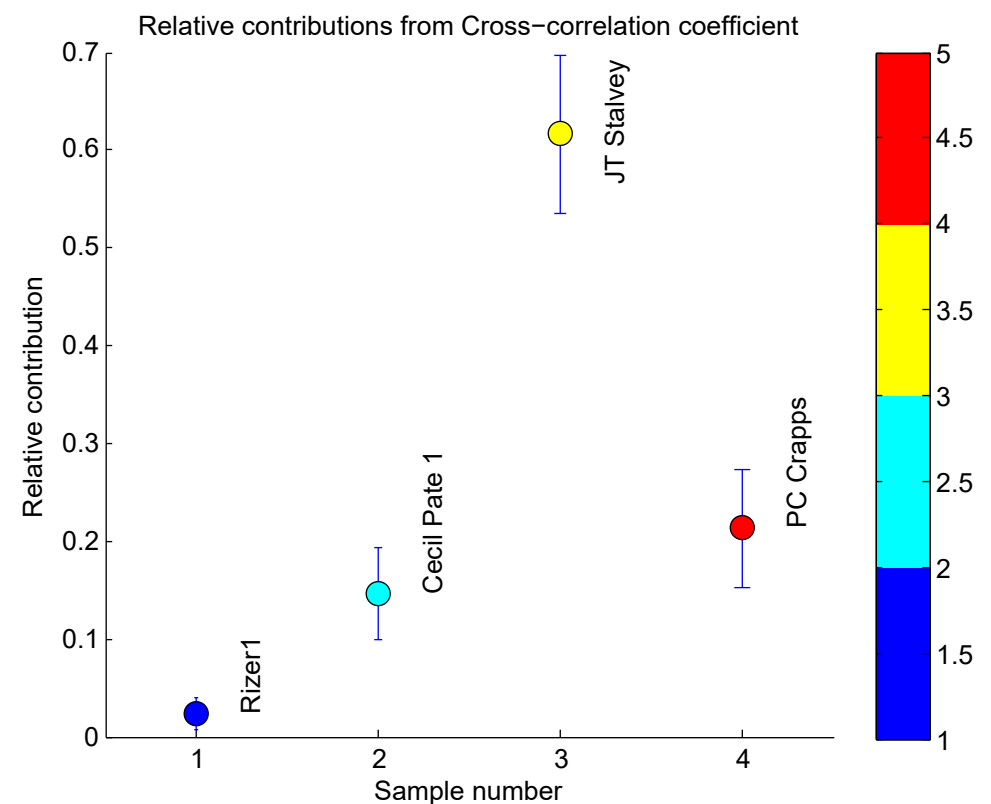

Supplemental Figure A: DZ Mix results for St Regis Paper Co sample (daughter) with PC Crapps, JT Stalvey, Cecil Pate, and Rizer 1 samples as parent modeling inputs. The DZMix modeling algorithm quantifies source mixing proportions through a combination of inverse Monte Carlo modeling and optimized forward modeling (Sundell and Saylor, 2017).

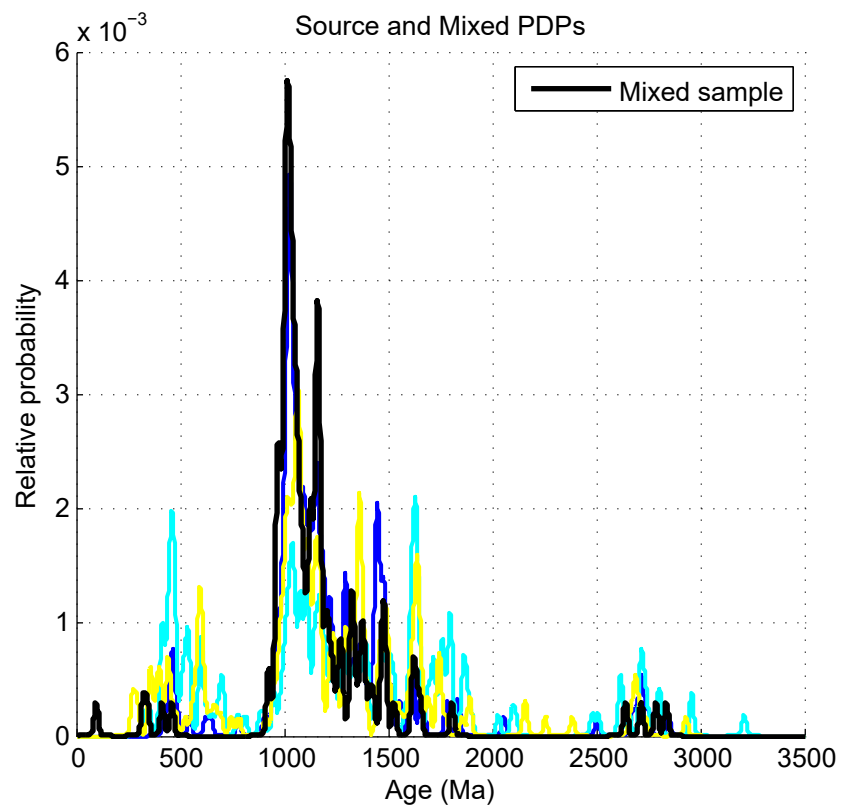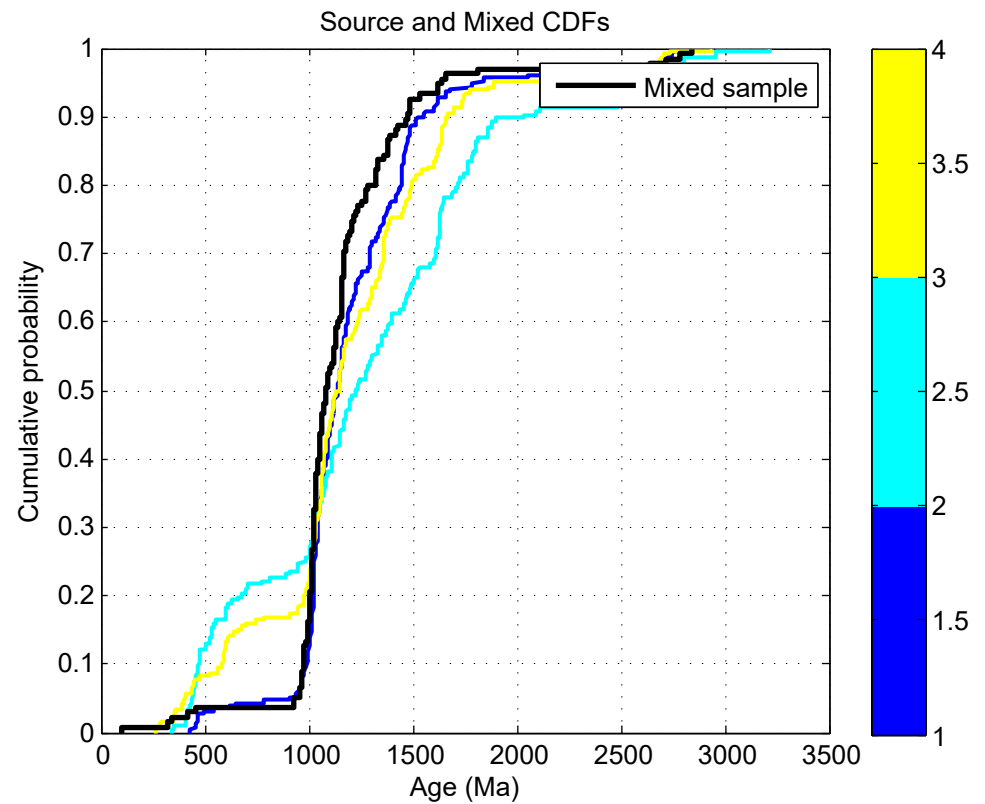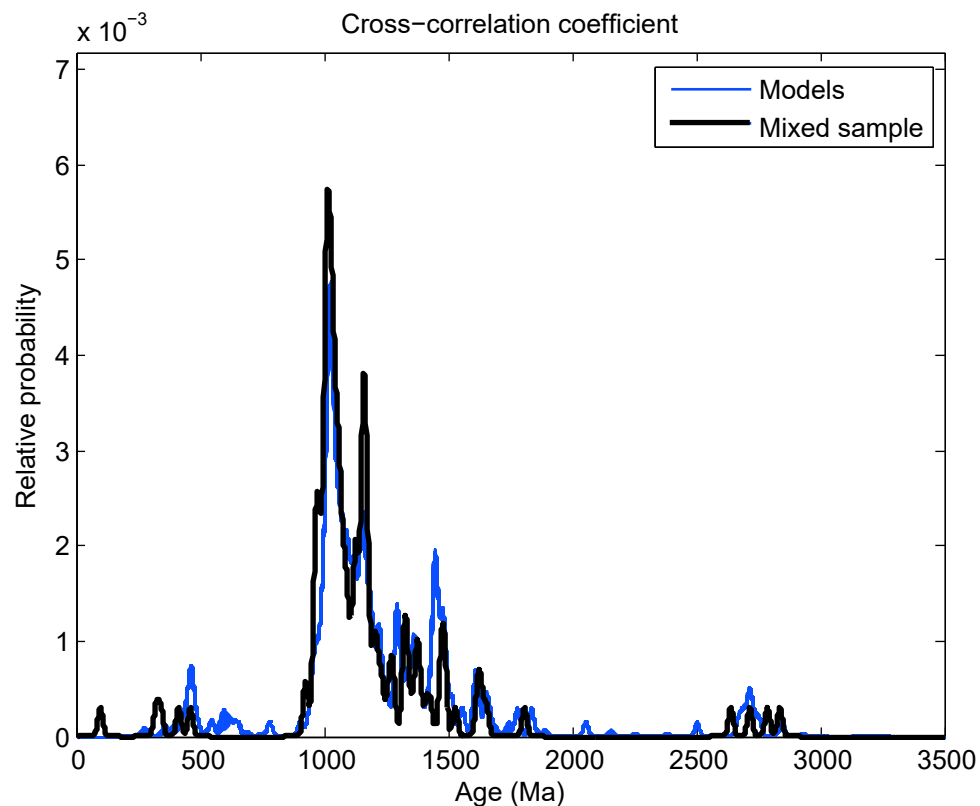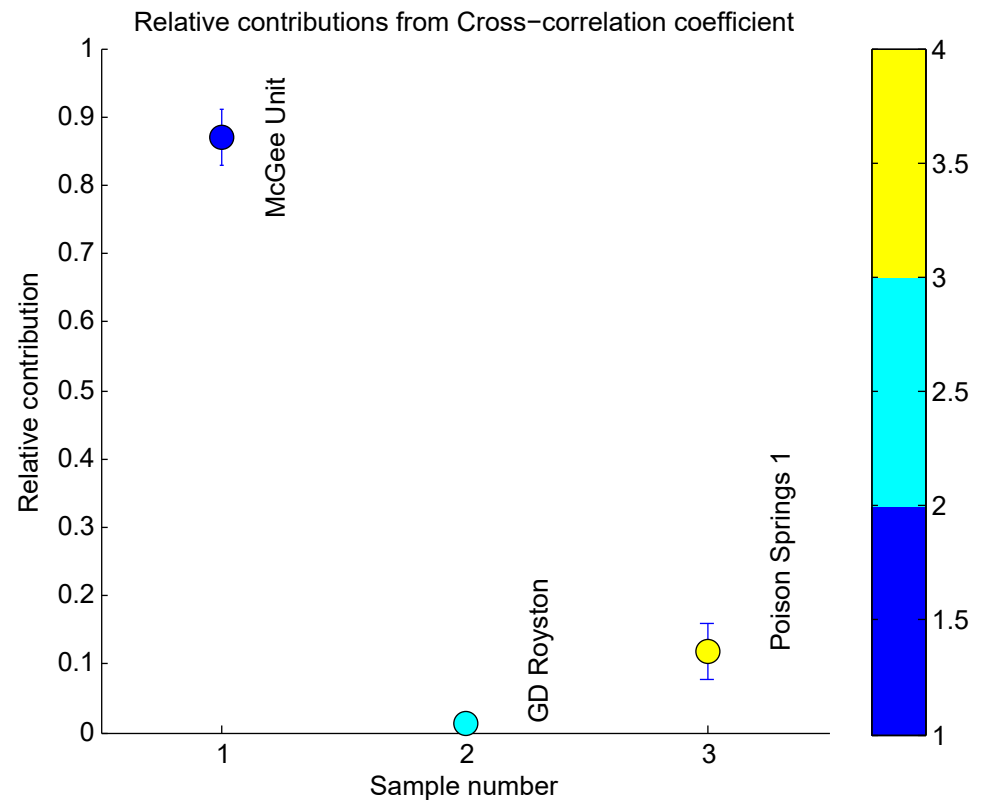

Supplemental Figure B: DZ Mix results for Crossett Lumber E1 sample (daughter) with Poison Springs 1, GD Royston, and McGee Unit samples as parent modeling inputs. The DZMix modeling algorithm quantifies source mixing proportions through a combination of inverse Monte Carlo modeling and optimized forward modeling (Sundell and Saylor, 2017).

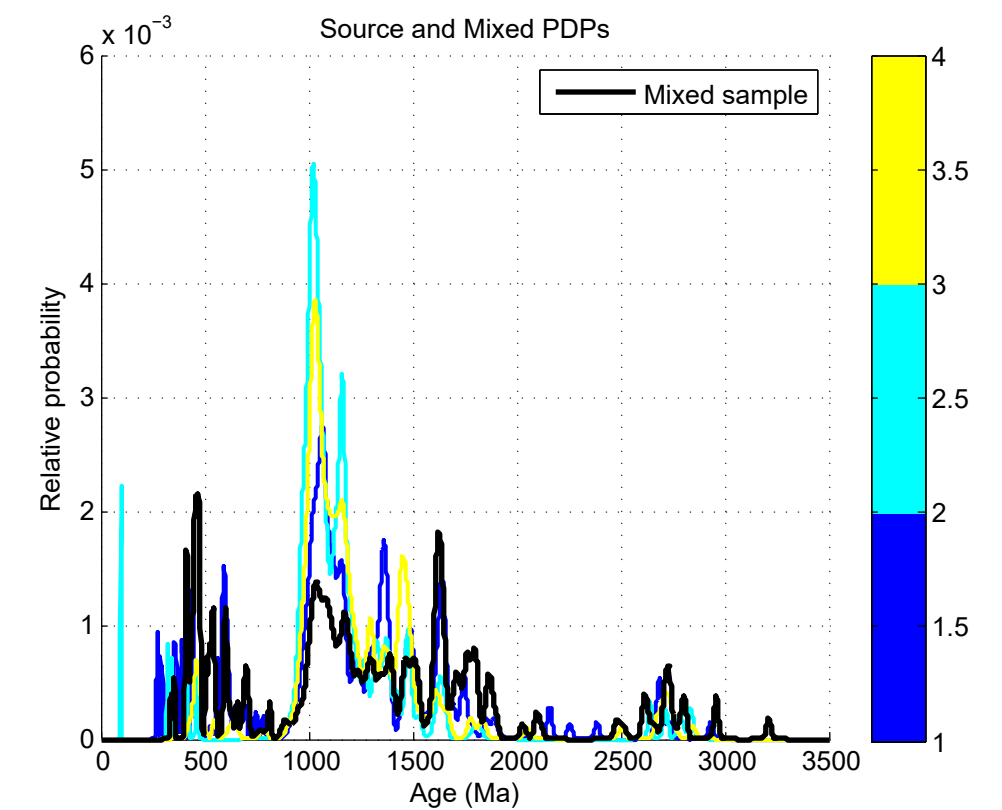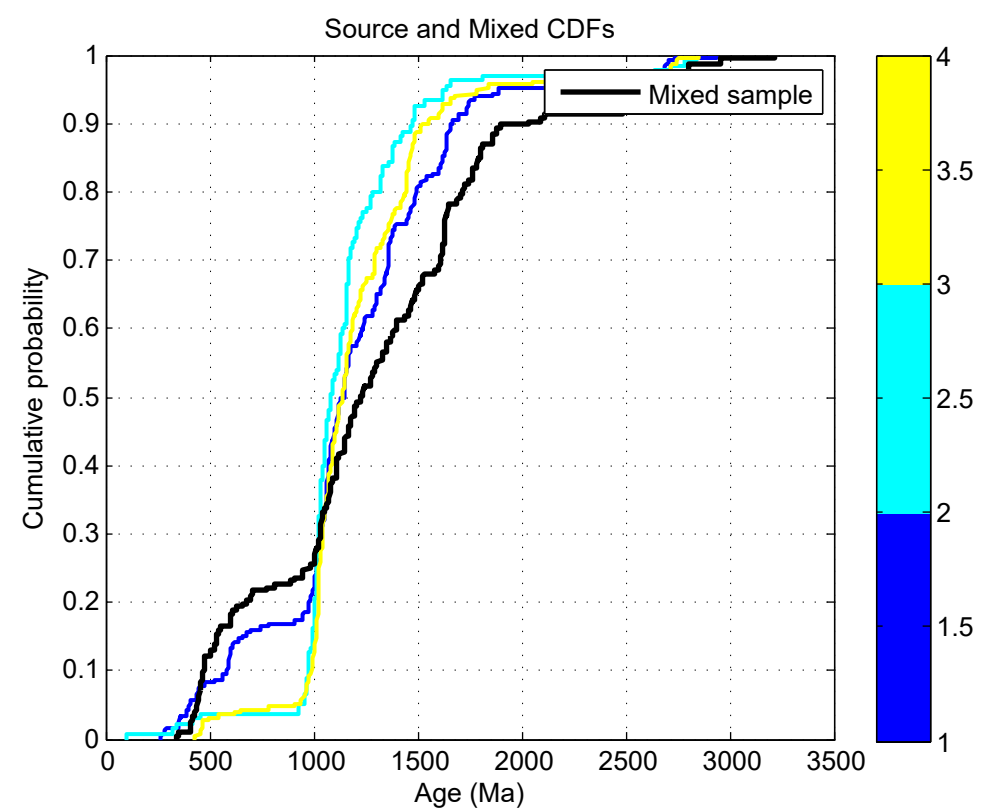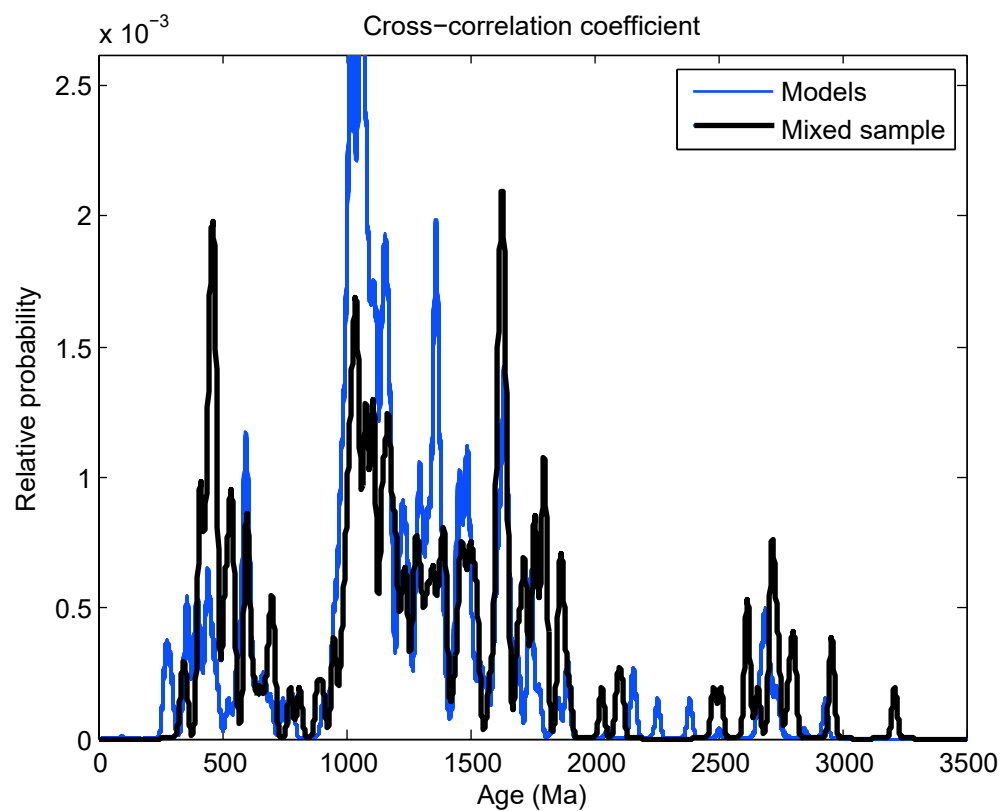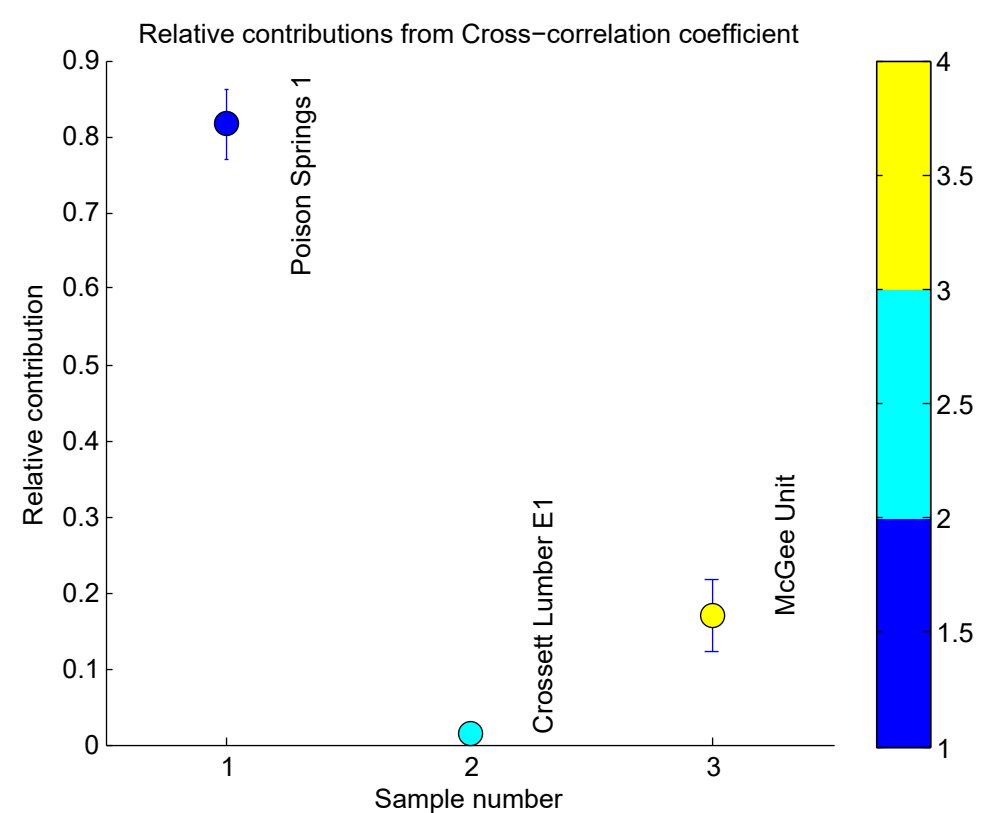

Supplemental Figure C: DZ Mix results for GD Royston sample (daughter) with Poison Springs 1, Crossett Lumber E1, and McGee Unit samples as parent modeling inputs. The DZMix modeling algorithm quantifies source mixing proportions through a combination of inverse Monte Carlo modeling and optimized forward modeling (Sundell and Saylor, 2017).

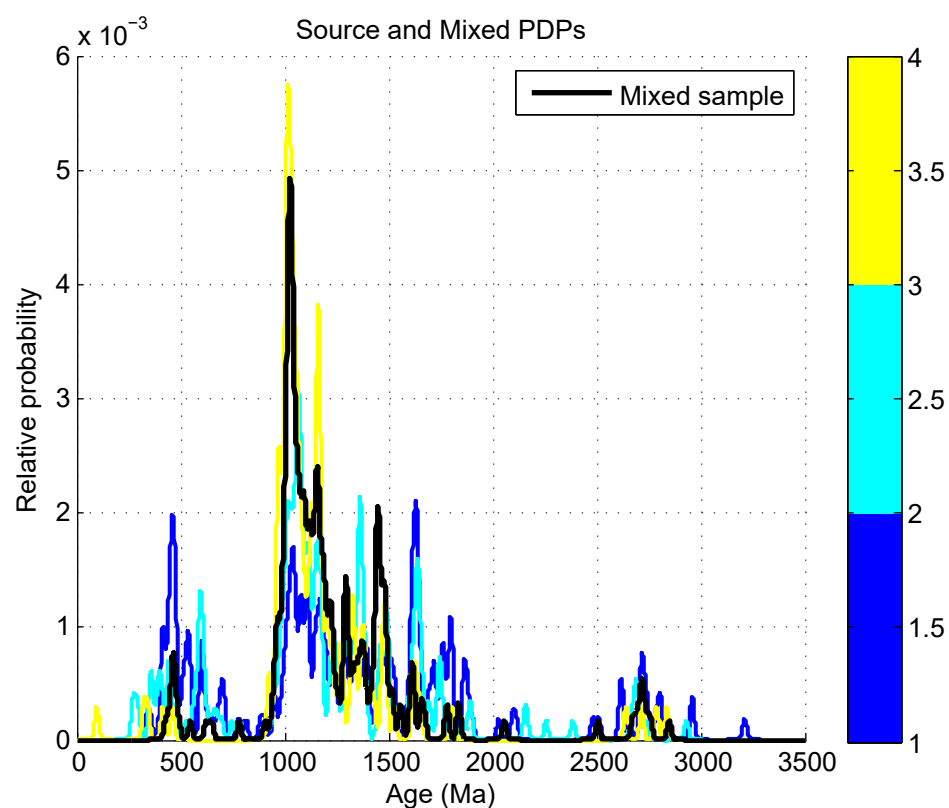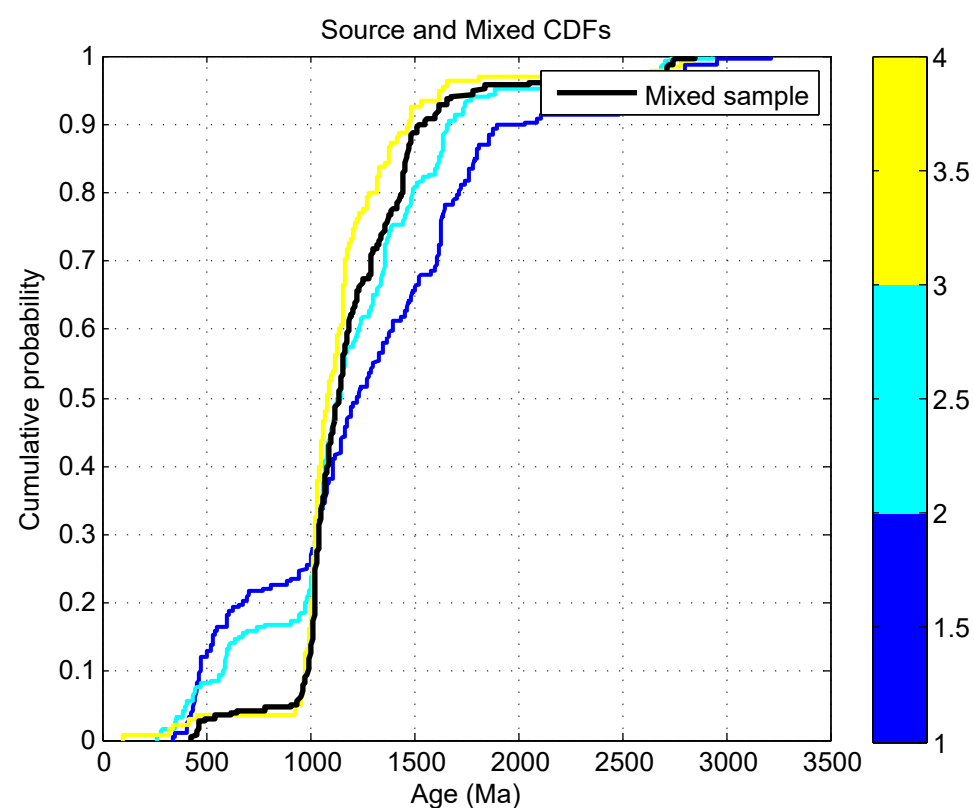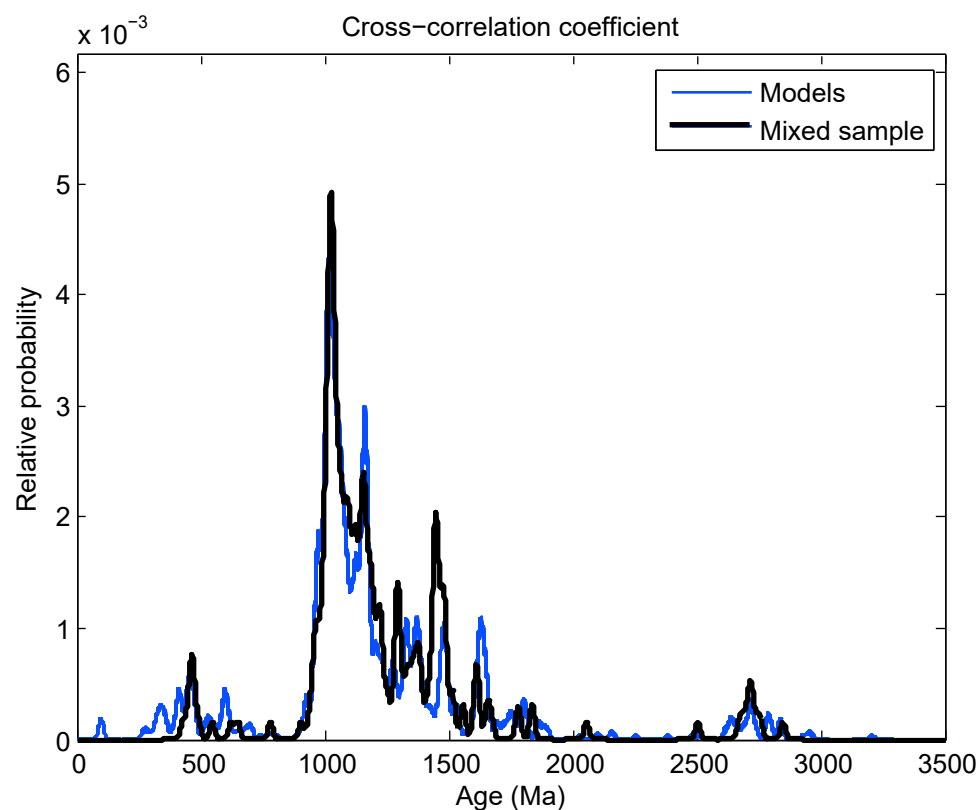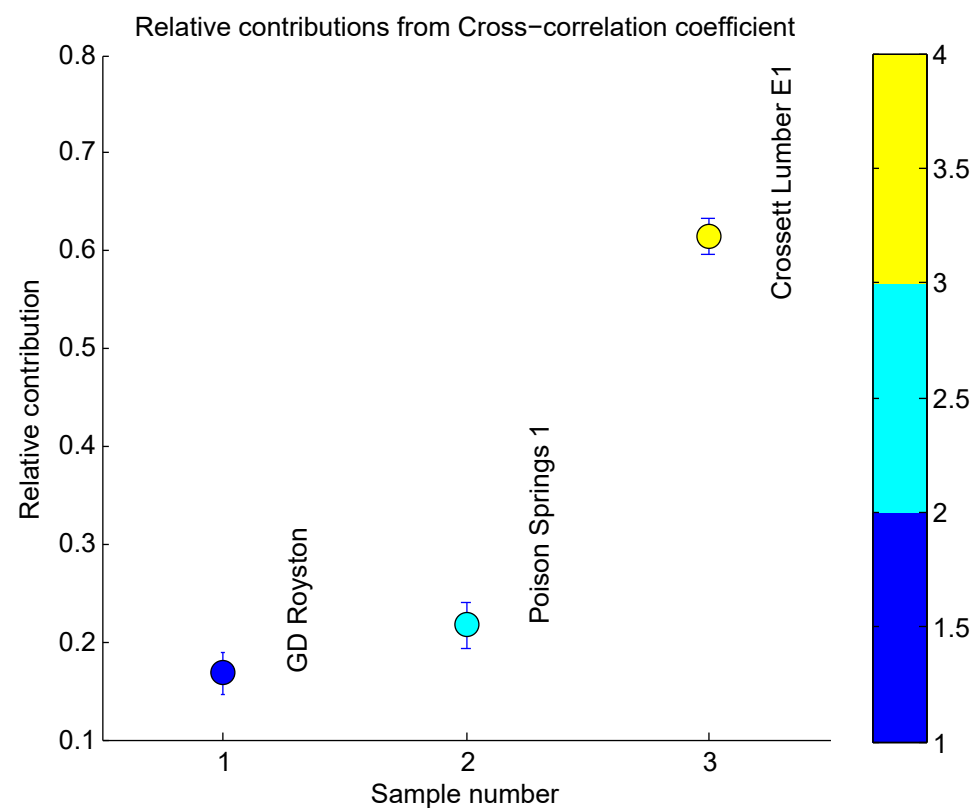

Supplemental Figure D: DZ Mix results for McGee Unit sample (daughter) with Poison Springs 1, Crossett Lumber E1, and GD Royston samples as parent modeling inputs. The DZMix modeling algorithm quantifies source mixing proportions through a combination of inverse Monte Carlo modeling and optimized forward modeling (Sundell and Saylor, 2017).
